# Supplementary material for: The Transcriptional Landscape and Hub Genes Associated with Physiological Responses to Drought Stress in Pinus tabuliformis
Source: MDPI journal article supplement (doi:10.3390/ijms22179604), 2021-09-04
Supplement: s1 [file s1]

## Supplementary Figures:

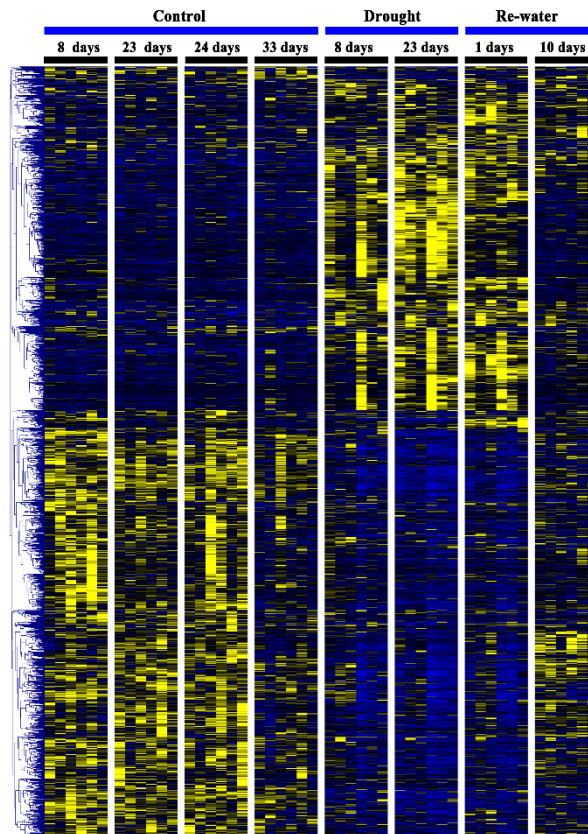

**Figure S1.** Differentially expressed genes in response to control, drought and recovery. Heatmap illustrates the Expression profiles of differentially expressed genes between control (Control: 8, 23, 24, and 33 days; Drought: 8 and 23 days; Recovery: 1<sup>st</sup> and 10 days), Drought (8 and 23 days), and Re-watering (24 and 33 days). Different colors represent different significance levels (Yellow: up-regulated genes and Blue: down-regulated genes).

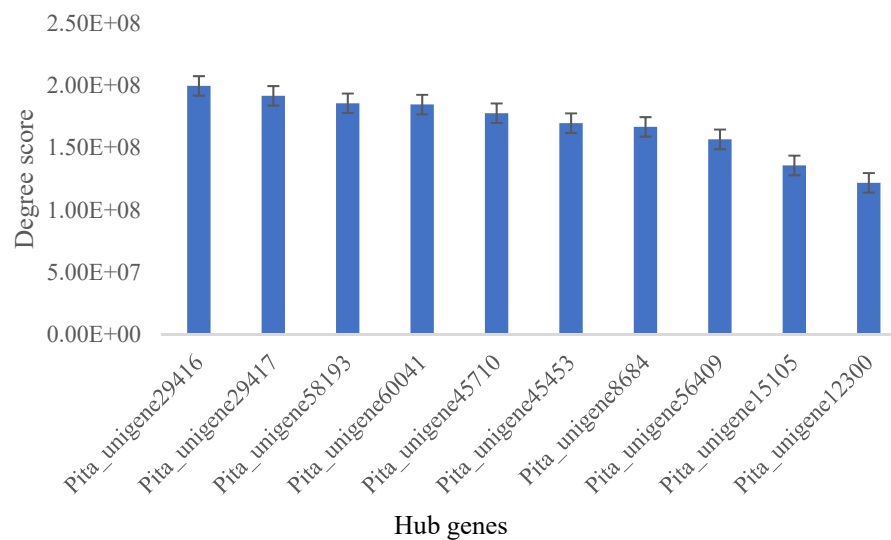

**Figure S2:** The bar graph shows top 10 ranked genes in every module were considered to be hub genes, analysis with cytoHubba by degree centrality with a degree score.

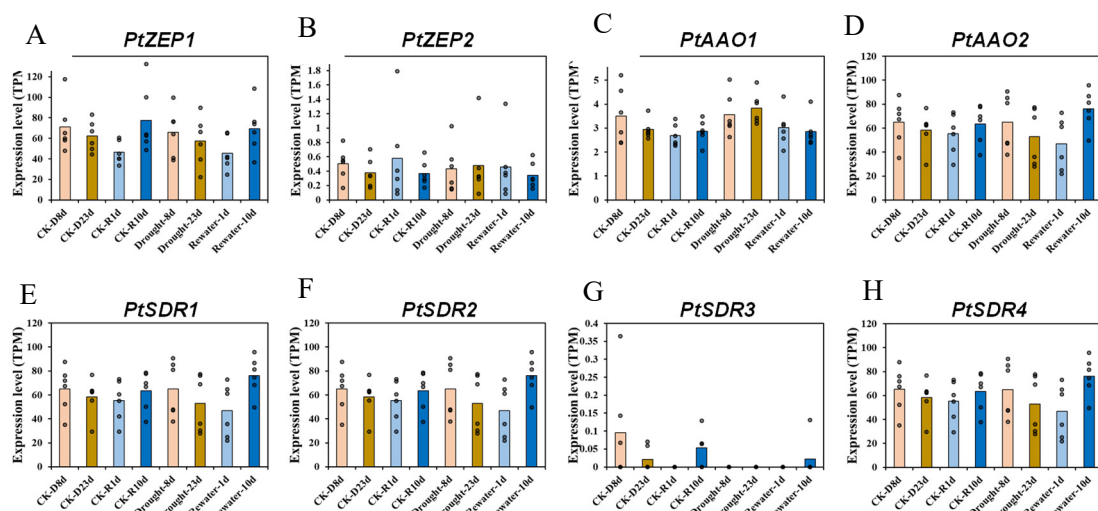

**Figure S3:** The expression profiles of genes coding key enzymes of the ABA pathway, as zeaxanthin epoxidase (ZEP) (A&B), ABA aldehyde oxidase (AAO) (C&D), ABA-deficient 2 which belongs to short-chain dehydrogenase/reductase (SDR) family (E, F, G, & H).

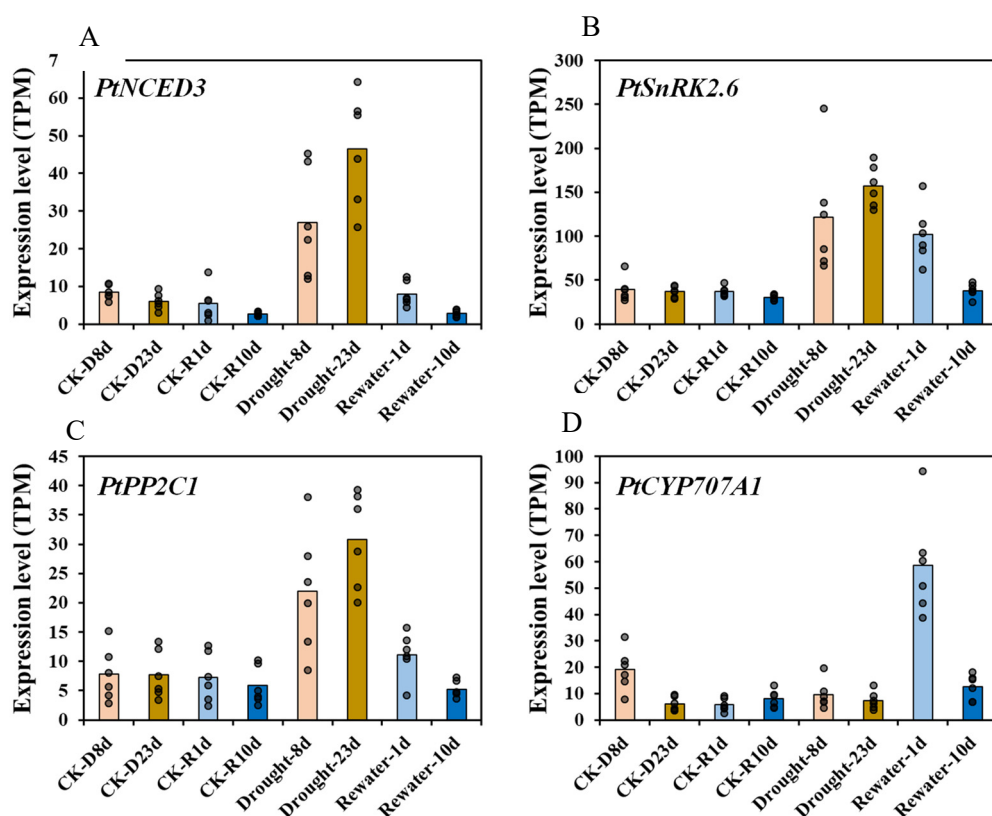

**Figure S4:** The expression profiles of genes A: *PtNCED3*, B: *PtSnRK2.6*, C: *PtPP2C1* and D: *PtCYP707A1*. *PtSnRK2.6* encodes calcium-independent ABA-activated protein kinase, *PtPP2C1* (*Pita\_unigene2135*) encodes a serine/threonine phosphatase activity PP2C protein, which are highly induced by ABA under drought stress. The CYP707A family with ABA 8'-

hydroxylase activity, involved in ABA catabolism, was significantly upregulated after rewater 1 days.

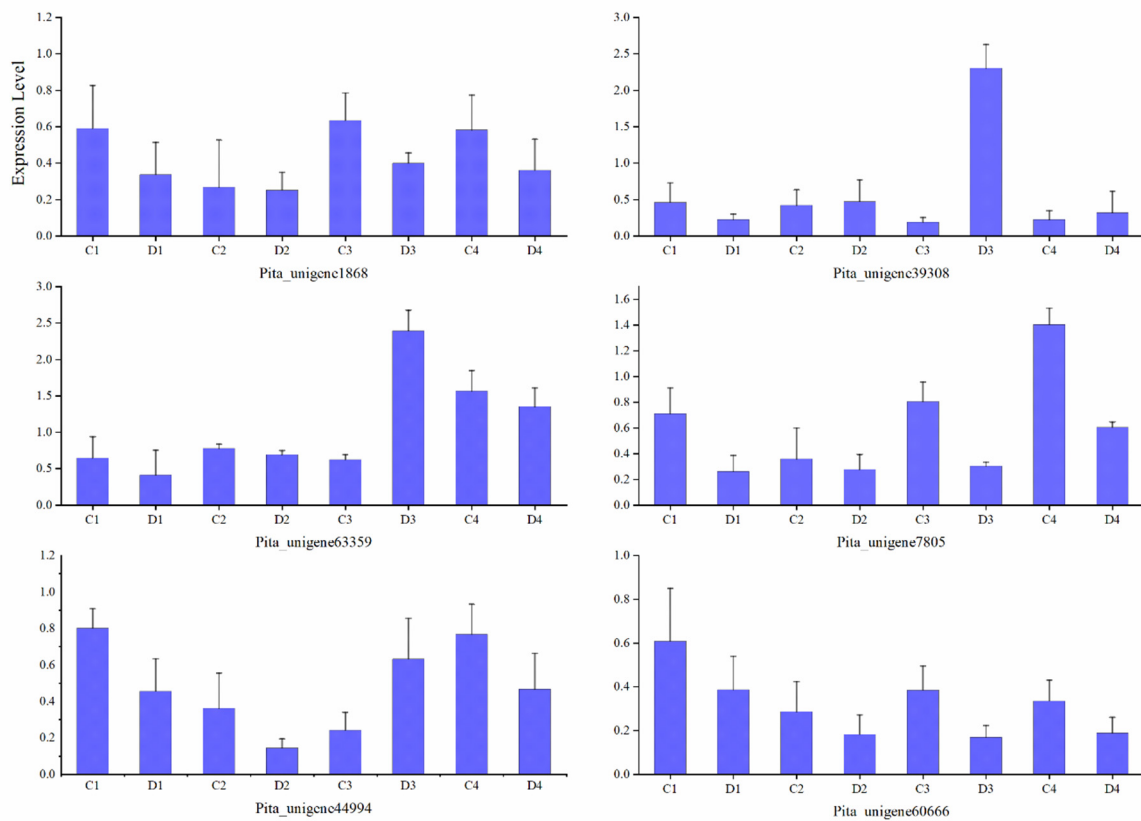

**Figure S5:** Differentially expressed genes were analysed by qRT-PCR. The expression responses of six transcription factors to control and drought treatment. Four-time points (8 days of drought, 23 days of drought, and 24 hours of re-watering and 10 days of recovery) with six biological replicates were analysed using qRT-PCR. Fold changes [ $\log_2(\text{ratio})$ ] of transcript expression levels (Y-axis) in response to drought stress were investigated across a time interval of control, mild drought, severe drought, and rewatering stages (X-axis).

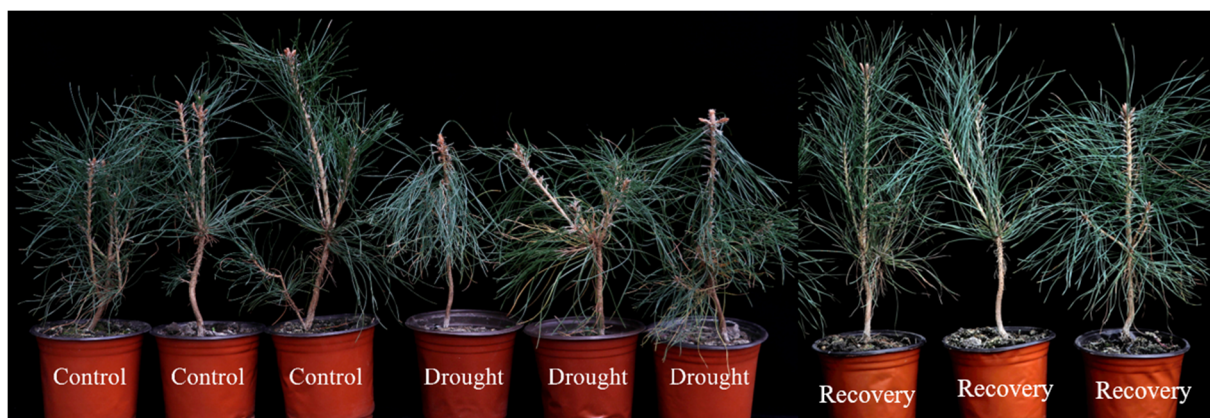

**Figure S6:** Morphological responses of *Pinus tabulaeformis* seedlings under control, drought and recovery stages.
