# Supplementary material for: The Transcriptional Landscape and Hub Genes Associated with Physiological Responses to Drought Stress in Pinus tabuliformis
Source: Int J Mol Sci. 2021 Sep 4;22(17):9604. doi: 10.3390/ijms22179604 (PMC8431770; doi:10.3390/ijms22179604)
Supplement: Supplementary file 1 [file ijms-22-09604-s001.zip]

Archive with 6 entries (6 files):
- S1 DEGs in response to control, drought and recovery. .xlsx
- S2 ABA-related DEGs.xlsx
- S3 Transcription factors  .xlsx
- S4 Protein kinases .xlsx
- S5 Transcriptional regulators .xlsx
- Supplementary Figures.pdf
