# Supplementary material for: The Transcriptional Landscape and Hub Genes Associated with Physiological Responses to Drought Stress in Pinus tabuliformis
Source: Int J Mol Sci. 2021 Sep 4;22(17):9604. doi: 10.3390/ijms22179604 (PMC8431770; doi:10.3390/ijms22179604)
Supplement: Supplementary file 1 [file ijms-22-09604-s001.zip › S1 DEGs in response to control, drought and recovery. .xlsx]

## Sheet: Expression
Deferentially expressed genes in response to control, drought and recovery.
target_id	C1-1	C2-1	C3-1	C4-1	C5-1	C6-1	C1-2	C2-2	C3-2	C4-2	C5-2	C6-2	C1-3	C2-3	C3-3	C4-3	C5-3	C6-3	C1-4	C2-4	C3-4	C4-4	C5-4	C6-4	D1-1	D2-1	D3-1	D4-1	D5-1	D6-1	D1-2	D2-2	D3-2	D4-2	D5-2	D6-2	R1-1	R2-1	R3-1	R4-1	R5-1	R6-1	R1-2	R2-2	R3-2	R4-2	R5-2	R6-2
PtTFL2	515.022	550.104	779.353	484.43	541.755	438.809	485.978	502.323	652.139	540.978	581.01	579.519	577.147	440.621	658.543	657.203	521.23	501.606	608.89	356.622	711.048	554.015	583.441	585.396	301.068	422.11	512.31	111.496	296.962	406.887	211.573	314.943	411.32	72.1501	218.681	222.567	217.615	337.524	448.223	166.737	204.911	353.093	422.85	505.305	617.891	431.111	519.329	490.254
PtRLK7	0.530942	1.7102	0.921867	0.918787	2.35079	0.660335	0	0.493814	0.106868	0.210824	0.611762	0.237279	0.505135	0.293372	1.98231	1.45573	0.252395	0.754682	0.222006	0.146268	0.717002	0.451968	0.269994	0.288928	0.927749	0.542233	0.23556	0.429357	0.376635	0.0752999	0.0293685	0.400547	0.252509	0.118146	0.0131742	0.167646	0.725175	0.791116	0.214782	0.317598	0.0167811	0.642148	0.515093	0.408785	0.154231	0.415349	0.417644	0.254243
PtRLK3	1.25208	1.66279	1.8527	1.46878	1.14514	0.592743	0.457635	0.698648	0.798843	0.354321	0.248037	0.205432	0.718873	0.773123	0.90557	1.63627	0.521667	0.545442	0.441218	0.00234216	0.679189	0	0.235376	0.704828	0.600422	1.08066	0.566891	0.252354	0.545221	0.978179	0.632539	0	0.00436068	0.0607265	0.411162	7.63094e-10	0	0	1.53978	0.0705943	0.20609	0.0151883	0.820316	0.307456	0.930413	0.7897	0.257051	0.0713408
PtRLK25	3.1871	2.67938	3.4777	2.39952	3.43396	2.74331	2.58767	1.74203	1.80842	1.54266	1.94319	1.7792	2.20737	1.15781	1.96126	2.60506	1.18472	3.42074	1.4504	1.49068	0.98358	1.03838	1.27042	0.608205	1.13061	2.71975	2.37279	0.0405283	0.854955	1.10053	0.650401	0.963338	0.576881	0.182557	0.290497	0.39429	1.28242	1.47547	1.44471	0.487086	0.649395	0.736527	1.34735	1.24654	1.32323	1.02662	1.42982	1.01388
PtRLK20	0.0346544	0.114031	0.410268	0.215572	0.106866	0.221509	0.0581428	0.222898	0.280357	0.303987	0.34117	0.184331	0.642152	0.429211	0.266838	0.221721	0.27732	0.380156	0.225131	0.131121	0.174777	0.307655	0.152446	0.130737	0.169613	0.304707	0.127647	0	0.0819541	0.0324651	0.20334	0.106246	0.150753	0.0221971	0.0999195	0.0637001	0.117254	0.253014	0.209773	0.167672	0.107123	0.133988	0.066371	0.0809963	0	0	0.0232087	0.0270958
PtPLP2	0.28403	0.403542	2.62423	0.29633	3.08995	0.628777	0.608076	1.01903	0.870312	0.720286	0.452846	0.373265	0.583524	0.933752	4.56953	1.04502	0.371448	1.39157	0.409577	0.216962	1.23687	0.178417	0.349391	0.229352	0.68443	0.27661	0.448041	0.261991	0.312766	0.25218	0.526785	0.227303	0.484588	0.338147	0.141215	0.360659	0.6305	0.110938	1.0715	0.181157	0.182761	0.259656	0.516282	0.274445	0.274896	0.269197	0.47517	0.281841
PtPK8	1.42347	1.60709	0.630359	0.194075	1.36293	0	0.0127893	0	0.378291	0.7071	0.332694	0.0316953	0.316783	0.429932	0.729454	1.17835	0.378567	0.145615	0.000938753	0.111041	0.795529	0.130457	0.443571	0.202111	0.591918	0.160267	0.836843	0.622383	0.773377	0	0.532262	0	0.476532	0	0.43109	0.0940897	0.213284	0	1.41374e-09	0	8.64366e-07	0.214628	1.04094	0.871451	0.886365	0.6037	0.613467	0.334175
PtPK3	2.85728	6.01672e-05	1.04158	4.58076	3.16254	4.38269	9.73961e-09	7.55331	5.98438e-07	1.8612	5.54723	1.86446	0.0299044	9.91058e-05	1.52372	2.55524e-06	1.03839	0.00628049	5.02133	3.43912	0.000590373	1.88948e-05	4.49985	0.0550379	0.000531587	0.141401	0.00319071	0.0537564	1.57397	5.68541e-06	1.47129	0.0051537	0.254383	2.65655	0.00421839	0.149179	1.62404	7.53831	2.57119	0.11973	3.44454	1.87135	0.276086	0.0465587	0.0108351	4.9279e-05	1.3666	2.95007
PtPIN4	2.37763	0.771388	1.9366	1.98404	1.40688	2.20719	3.85193	2.80838	2.01177	3.31068	2.52617	2.6879	3.13465	2.24984	1.09662	2.22309	4.17567	3.09888	2.36218	1.80441	1.03844	1.51725	2.21397	3.2212	0.99198	1.13236	0.911637	0.857739	2.41561	0.568685	1.32714	0.79301	1.20979	0.480465	3.34124	0.589989	1.10436	0.837297	1.84048	0.915098	4.24112	0.555426	0.845986	0.925101	1.14195	1.00685	2.83169	0.445733
PtMYB5	2.16114	1.15491	3.41339	8.55708	4.37186	3.28764	2.38934	2.26322	2.20123	4.24759	2.96394	1.29114	5.35092	2.14414	1.49092	3.94381	0.92049	2.17311	8.98549	1.68694	3.02341	4.21493	3.15895	1.71464	1.40862	2.11763	5.84242	1.51987	2.23242	1.4609	0.491599	0.780575	2.40427	1.23083	0.40375	0.803899	1.43188	1.19942	1.64587	1.4711	0.365061	1.1203	2.13168	3.04509	4.37331	4.75551	1.36935	3.97259
PtKO1	8.11366	0.824803	1.00243	1.64941	4.93783	1.38778	0.903825	3.53243	2.8671	1.54113	2.6317	1.9514	0.00792018	0	1.51895	3.02345	0	0.388023	3.24836	3.50515	0.000176404	0.386958	2.2847	3.16466	0.000732438	8.86723	8.06301	1.63333	2.33846	7.00274	0	13.7093	8.29589	0.836967	2.79133	4.36225	0.938136	2.3915	6.39174	2.50184	3.27397	2.09515	0.475942	10.5965	9.42954	2.58243	2.24618	7.86349
PtKAO1	23.6437	17.5396	27.4184	66.886	25.6718	11.2317	23.6093	17.5826	28.8946	62.2493	24.9662	11.9346	73.5481	28.6341	24.9898	30.5075	19.6542	38.0719	24.1206	14.1901	16.9683	18.276	16.9597	7.74378	11.8097	16.5939	13.4348	1.97087	4.3744	4.00994	10.862	16.1434	16.2177	0.633455	3.5501	5.53408	10.3037	14.6858	12.3809	1.41974	1.1738	13.0523	21.8965	21.9781	20.4721	15.0634	15.0417	16.632
PtHP1,histidine	1.73682	6.65932	24.9266	6.51702	16.1103	24.7591	0.896332	3.37821	4.79791	5.66695	6.0827	20.0798	3.32468	4.35094	7.3849	7.29015	21.1751	5.21477	1.6702	1.13846	2.39155	3.28246	4.04927	14.979	6.48312	3.68538	5.67784	1.72046	4.15239	1.26799	3.44241	2.98486	4.91099	9.16876e-07	1.60447	1.30538	3.7307	4.51916	4.08296	1.20738	1.54997	2.16269	2.89383	2.94245	3.81548	3.30377	7.05313	2.21078
PtGA2ox5	3.74392	7.07562	24.9371	13.2337	14.4544	1.87698	6.90867	2.75434	3.4187	5.84019	4.41301	0.132178	5.09326	3.95432	11.0939	7.80962	0.226814	7.7348	1.82895	0.950109	2.00289	2.11334	1.98176	0.195067	1.18704	0.995667	0.310711	0.277348	7.07076	0.597792	0.18455	0.380732	0.110732	0.218926	2.8242	0.0471723	0.313777	0.86276	0.363632	0.0940904	1.77085	0.495011	0.0741092	0.547761	0.340923	0	6.47262	0.486849
PtGA2ox2	10.014	20.722	26.6546	35.2986	22.192	29.6	21.9252	9.70605	27.8934	48.6827	57.026	30.4364	41.3216	8.10924	25.1169	26.7984	32.153	22.6858	35.367	5.72178	21.1211	24.6779	14.7902	26.534	29.3975	18.6288	19.3311	0.188172	5.77588	10.6402	22.7137	6.19259	10.4941	0.152642	3.09018	6.32675	15.7832	11.1316	11.0473	0.257875	2.33959	8.83572	42.0783	23.1889	20.1312	2.29418	12.5316	14.0518
PtGA2ox12	4.31052	1.55201	12.9233	0.131876	0.144813	0.427844	0.651851	16.2484	7.72176	1.60167	2.83243	0.282896	0.0782905	0.737605	3.95009	2.39204	0.721168	0.167398	0.44288	3.06853	1.2764	2.97153	24.1399	3.6032	1.29802	2.54484	8.33489	12.7691	1.20634	0.530859	13.9693	7.54648	1.71767	14.0147	0.832135	4.64471	3.64838	7.33177	31.924	11.8923	0.914127	3.32582	1.27516	7.50214	24.362	2.00756	16.1362	1.86643
PtGA2ox10	9.23649	38.8828	47.1557	100.99	13.6425	45.4627	151.672	107.959	239.723	406.733	168.531	166.149	199.44	85.4626	77.0815	68.7187	211.418	130.816	337.981	12.0756	45.1477	52.3037	139.93	139.655	28.6547	50.2028	15.5754	1.59884	6.26768	4.1776	116.69	68.747	55.2472	2.47531	5.70026	18.9476	31.3776	58.4625	70.9876	5.0927	1.19785	17.4746	251.426	314.079	33.0381	596.43	102.378	70.1402
PtGA2ox1	4.12627	9.58735	20.5724	8.3825	5.23158	12.6141	7.52415	10.1548	6.54317	7.95008	5.53022	9.76196	9.74663	9.6687	7.91018	4.97944	10.3936	6.91874	4.60289	6.61601	9.07396	2.53888	4.94265	6.44857	1.87735	3.73359	6.75977	3.14013	0.809842	5.19848	0.45264	0.757502	2.10422	1.29298	0.171223	1.30265	0.552641	0.303015	1.95993	1.27217	0.287899	1.556	2.68093	3.49367	8.74727	3.54056	1.91637	5.53343
PtBEBT1	11.5476	7.05639	7.52644	7.07773	5.77694	8.43021	7.12155	11.6419	11.2105	8.94489	16.2778	8.98324	9.5673	11.4325	12.7026	10.7129	12.7621	8.09038	10.8041	19.129	10.3842	8.61478	9.49406	10.163	14.1988	10.0168	10.2131	13.4359	13.6363	7.15457	28.4028	20.9077	23.7954	18.6262	22.7781	23.2964	46.166	31.4829	29.065	49.8682	31.8488	29.5673	17.7778	17.1372	14.4333	15.59	18.8321	16.0717
PtAUX4	1.92088	1.10551	3.86813	2.76796	4.10331	6.07807	1.47489	1.25097	1.27678	0.816863	0.612104	0.964993	0.601551	2.76551	1.05471	1.89633	0.803326	4.08843	0.392621	1.50907	0.66632	0.336716	0.91557	0.808483	1.20194	1.60971	0.622965	0.409931	1.30691	0.564363	0.390208	0.559857	0.0354212	0.110084	0.555247	1.12273	0.485972	0.384464	0.0656548	0.319542	0.211257	0.236872	1.38015	2.84521	0.792391	3.39367	0.421418	1.08614
Pita_unigene9997	1.57043	3.77	2.6883	0.631873	2.24863	1.60416	4.99829	13.6041	13.2794	2.86765	7.42357	2.56182	1.58502	9.12063	14.2052	3.47251	2.76275	2.76989	3.1979	6.80721	9.84687	8.14006	5.50506	2.25734	37.0037	14.2557	11.6659	45.9285	21.6705	16.591	74.0408	49.5767	36.2088	55.1081	65.8412	63.0768	13.9367	24.4153	22.216	20.64	18.895	13.6516	20.2143	21.4093	16.5991	26.9201	23.1223	15.4005
Pita_unigene9976	3.55209	1.93218	2.61626	1.98524	1.77664	0.829215	1.8773	2.93987	1.40023	1.4597	1.57173	0.715646	1.61588	2.17166	0.944196	1.87249	0.450639	2.43479	2.07171	2.89562	1.49071	1.65091	1.81708	0.927187	1.31875	0.0842552	0.716853	0.801129	0.474591	0.784408	1.09754	0	1.57085	0.501707	0.523807	0.996476	0.381211	0.343585	1.5661	0.508697	1.11736	0.614005	0.5309	0.588729	0.923055	0.447428	0.838927	0.497353
Pita_unigene9949	15.997	25.5085	3.06357	5.79141	18.4408	15.9549	2.30258	1.67416	6.54301	2.13276	1.85498	4.40486	4.46089	1.9109	19.9226	7.39781	5.34794	5.08647	1.91472	1.24365	24.9999	4.57779	4.56978	3.06197	70.1773	4.66762	6.73305	64.0532	11.994	3.78381	64.0854	8.51279	4.3437	26.4355	11.1246	20.4363	21.8362	4.41503	2.64829	9.72892	5.82728	6.9128	12.7997	1.00281	1.52924	3.37427	7.99563	2.92545
Pita_unigene9932	10.8665	20.1373	20.3556	0.0817556	1.72177	0.231741	0.444944	3.58798	15.5156	1.71586	0.0760062	1.04382	0.0748375	0.751433	20.7469	27.9343	2.15981	0.292759	5.84002	0.23255	0.585185	2.50966	59.8693	2.94544	5.57936	2.51132	9.26185	54.6814	18.9535	2.29296	3.97727	11.0443	3.95469	35.8022	7.32266	5.9639	25.7302	14.8913	57.5695	38.8847	50.1982	29.3618	4.14493	1.91861	25.3933	31.384	68.5853	0.730238
Pita_unigene98	0	2.35622	0	1.63223	0.766192	0.77653	0	0.781738	3.50327	3.72875	1.51734	1.60991	0.749574	0	0.709208	0.776561	0.668648	2.22736	2.19399	0	0.733785	0	1.50979	0.685975	0	0.828517	0	0	0	0	0	0	0	0	0	0.722446	0.752161	0	0	0	0	0.764027	2.26339	1.52398	0	4.94777	2.37834	0.737149
Pita_unigene9790	7.54242	1.73725	0.804581	1.06075	1.6207	5.41272	5.19189	2.45004	0.645545	0.967413	0.422854	3.41094	1.9375	2.66118	1.754	1.72282	1.66717	7.23099	1.75442	4.3265	0.675434	2.24886	5.3911	3.54596	16.7506	5.62704	2.40527	23.9967	5.58852	5.07816	9.21794	7.81571	2.71539	15.7749	10.5315	5.41455	6.132	5.59527	1.6117	6.90551	5.39766	3.18245	6.40998	1.99882	2.0221	5.14063	4.06016	1.74411
Pita_unigene9728	3.51731	0.874779	4.76231	1.11801	0.584443	0.960624	3.40826	0.77754	0.956063	1.85303	1.79653	2.19288	1.95511	2.6291	1.22835	0.771713	2.78074	5.67573	1.17892	1.15684	1.81929	0.801804	6.20135	3.06414	1.95242	0.625354	1.25698	0.0986011	1.02262	2.76171	2.18316	0.910507	1.81567	0.171545	0.841203	1.35701	1.12443	0.223417	1.28651	0.500913	0.0906922	0.751162	3.09	0.954781	2.22573	1.0376	2.25896	1.18461
Pita_unigene9724	15.8607	2.34129	11.6643	1.79033	46.0691	45.8546	11.2751	8.62596	2.44248	1.57128	7.07581	21.8504	1.35646	8.11637	2.37913	23.7648	29.1433	13.9666	1.27845	6.77543	3.37814	19.3021	21.0597	31.7829	8.45133	1.47168	16.0332	0.332416	3.33246	0.910862	1.19501	0.584174	2.73705	0	0.717215	0.12362	0.861586	0.818686	2.25968	0.244551	0.137354	0	12.0429	0.963609	9.52411	4.04504	4.26517	0.131808
Pita_unigene9720	2.22666	1.5254	1.35236	0.607735	2.25904	1.44631	1.39707	1.30927	0.456074	0.388642	1.80655	0.770731	0.500121	1.41389	0.899553	2.1723	1.1201	2.21189	0.255945	1.31622	0.757621	1.49706	1.62518	0.954571	3.30782	2.40196	2.29991	7.81483	1.00303	2.46496	3.35928	4.55655	2.78522	3.91569	0.938514	3.61978	3.38488	1.82994	4.00917	3.34352	0.321729	1.713	1.36186	0.934239	2.49572	1.747	0.346687	1.24975
Pita_unigene971	2.18553	1.89725	3.55718	10.604	1.63077	0.687476	4.17846	0.887009	0.567083	6.00232	0.30332	0.324503	6.28173	1.03802	3.70353	0.559071	0.0531093	6.66947	3.20113	0.868745	0.117758	0	2.82	0	2.52847	0	0.695276	0.311371	0.773644	0	0.378235	0	0.553	0.0607246	0.0609757	0.0585626	0.244125	0	0.6392	0.107976	0.176191	0	0.844365	0	0.63268	0.0563357	1.4005	0
Pita_unigene9701	4.85768	26.8344	8.50346	10.6826	19.366	4.58901	6.94235	8.01407	24.8942	9.34741	24.2694	4.55035	15.7564	5.49939	32.312	26.9192	6.1414	6.09637	5.50767	4.38583	22.1794	14.7875	3.82151	2.82955	12.5984	1.69871	4.97644	1.36991	4.78821	2.76333	4.66604	1.88289	5.3347	0.914267	4.1374	1.2599	7.23452	1.84042	3.89152	1.4129	3.35878	2.22732	18.3331	2.07801	2.65277	2.60156	5.2343	1.69268
Pita_unigene9639	0	5.63452	0	0	0	0	0	0	7.73778	0	0	0	0	0	8.857	0	0	0	0	0	6.01072	0	0	0	13.7319	2.96727	31.4605	26.4747	13.405	0	5.05798	5.28531	26.5207	6.94757	4.65178	0	11.4337	2.54401	22.5359	12.5726	4.33141	0	9.37702	3.42063	17.0824	12.0208	6.37751	0
Pita_unigene9632	1.96112	8.37419	10.5244	6.19364	15.4427	4.40784	3.92367	2.83276	3.48082	2.55483	5.91598	2.24952	1.94138	3.6156	9.22532	4.50907	1.96807	4.78228	1.43925	3.1378	4.78167	1.63678	3.50268	1.27943	3.25643	0.347614	0.450437	0.484852	0.356286	0.307065	0.793391	0.842713	0.356917	0.0780258	0	0.528437	4.50079	3.05317	3.62033	0.766548	1.13568	13.779	22.5996	8.76242	4.85043	10.2248	5.39179	11.2871
Pita_unigene9631	0.827842	0.823362	1.23801	1.0752	2.89887	2.2304	0.486424	1.22944	0.917842	0.882787	0.499837	1.05442	0.196645	0.539182	4.16775	2.03959	0	0.861958	0.479449	0.612425	0.288148	0.188261	0.59054	0.179991	5.49668	2.87021	2.28013	14.4017	3.15788	0.973006	6.2141	6.8314	3.50844	11.338	8.02805	3.06552	2.94397	3.51236	2.50915	3.17623	1.72529	1.58155	0.0990136	0.80869	0.614789	0	0.929626	0.28711
Pita_unigene9598	0.958924	0.0329426	0.0608224	0.27433	0.389453	0.0650627	0.28119	0.262325	0.26448	1.03341	0.255027	0.236328	0.220153	0.171872	0.207994	0.325933	0.278206	0.37181	0.0920447	0.194587	0.153842	0.211235	0.31612	0.028783	0.329906	0.209613	0.45657	0.755702	0.692656	0.15496	2.48688	0.64771	0.287886	2.09458	0.85768	0.212919	2.17386	0.675257	0.600279	0.733923	1.37966	0.351051	0	0.0641754	0.293797	0.147269	0.630611	0.061653
Pita_unigene9589	0	0	2.10653	0.16242	1.42439	2.99511	0.29269	1.6339	0	0	0.604332	1.50227	0	1.21526	0.557665	1.44434	2.03688	0.286488	0.42019	1.19287	0	1.52605	0	1.45527	5.85022	2.18055	5.63141	4.07204	3.1304	6.21022	6.31338	3.18815	4.62437	6.00822	1.09388	5.51944	6.75366	2.94416	5.08315	6.12015	2.43589	5.93371	4.62795	2.17831	5.53281	3.11717	1.29845	4.09098
Pita_unigene9573	0.735648	1.60461	0.29437	0.456168	2.39292	0.573024	0.624528	0.0872388	1.03847	0.314623	1.27162	1.38727	0.179605	0.0742622	1.41902	1.58393	0.686925	0.326316	0.656301	0	1.05792	1.64255	0.37914	0.742825	1.31145	0.925747	2.81992	2.6268	1.48846	1.8054	1.24863	1.22216	5.53269	2.07394	2.1238	2.81745	1.67944	2.42262	4.93694	1.38358	1.84474	2.65228	1.06084	0.876408	2.11987	1.14795	0.824251	0.912822
Pita_unigene9501	0.501988	0.908982	0.461717	0.662778	2.15732	0.269167	0.387715	17.9604	1.66224	24.4209	15.0517	2.84124	16.9244	10.0851	1.51614	8.41097	3.59701	0.55465	7.74699	38.0828	5.77245	51.444	12.2915	12.1531	10.0635	5.65063	13.0583	13.5868	7.00866	4.75056	67.0242	38.2058	15.8566	46.4091	55.9966	23.7443	48.6566	33.7916	42.0954	21.3436	48.0157	13.3201	27.3497	18.4883	28.8493	17.9572	49.7847	10.4505
Pita_unigene9378	4.25758	3.33855	2.84697	1.86319	4.82747	1.07984	1.14754	5.01599	2.62777	1.93381	3.57394	6.4537	0.919044	3.33225	4.43391	2.46992	1.80287	4.41218	2.51552	5.19509	2.84007	5.70711	2.6236	3.91205	24.7353	18.3251	1.3298	1.77427	2.19326	3.88941	28.8632	18.1694	5.96317	3.50173	5.35866	8.1736	37.328	16.1672	3.4045	2.87222	4.39566	2.06435	29.8446	18.9433	2.43767	2.39412	3.16764	3.94724
Pita_unigene9354	6.60319	6.98376	2.68903	1.64797	2.78209	3.68791	1.57657	1.91881	4.47532	2.57896	2.34449	3.58589	0.362697	1.4951	3.92647	2.15706	2.34354	2.86547	1.74548	1.92422	4.76418	3.12448	4.73968	3.76384	6.24442	6.7943	8.23359	5.72298	11.5248	5.37037	6.9983	17.2484	10.5189	5.71864	10.3545	4.28362	7.37731	5.5943	6.39385	2.83409	4.83509	3.26166	6.10482	3.77213	6.3542	2.53456	3.93655	1.74186
Pita_unigene9338	0.30796	0.530097	0.327615	0.371292	0.286615	0.600515	0.471017	0.26624	0.319323	0.49227	0.529505	0.362236	0.179511	0.718568	1.10377	0.435744	0.512186	0.26965	0.21291	0.465599	0.451573	0.135622	0.25849	0.0422728	0.194164	0.268047	0.254636	0.207438	0.216335	0.0430219	0	0.291573	0.0474278	0.125115	0.0398933	0.0880372	0.260262	0.323959	0.284729	0.301283	0.251984	0.273686	0.321833	0.211306	0.241446	0.044936	0.180679	0.230516
Pita_unigene9312	9.30728	5.49928	1.97302	2.01566	4.25626	5.49529	4.73688	4.28047	7.42827	2.38395	2.03334	4.85802	5.25979	9.21653	10.3193	4.93284	15.1906	11.0319	2.939	6.96661	5.45338	4.63484	4.45105	4.35158	5.28208	5.72444	2.89693	37.9005	14.2631	2.80866	13.4505	22.8298	8.78386	50.5001	33.7894	25.2082	10.2635	9.72235	10.1472	12.8563	15.3224	13.8968	1.68008	4.44235	3.59761	2.80978	5.20192	2.75543
Pita_unigene9255	0	0	0	1.18582	0.353629	0.1469	0	0	0.138927	0.15228	0	0.147038	0.513178	0.140124	0.158745	0.153774	0.136766	0.142012	0.149843	0	0	0	0	0.222968	0	0.151272	0	0	0	0.152524	0	0.158961	0	0.299353	0	0.132275	0	0	0	0	0	0	0	0.137624	0	0.133092	0	0.121567
Pita_unigene9222	18.1423	11.0547	13.8998	7.91148	10.4784	17.4234	11.5874	9.8773	8.98147	11.0864	11.0602	13.2921	11.7169	12.2337	14.108	13.7497	8.55998	13.4348	7.56639	21.2431	7.39856	11.2703	9.66341	8.77119	45.0071	28.7521	20.8315	139.73	38.5096	27.3981	89.47	96.5499	38.1151	147.439	111.279	81.8884	29.0579	18.5373	24.7619	27.3477	19.982	14.7925	8.42115	10.4238	9.45681	8.07427	9.82446	5.32353
Pita_unigene9214	5.26331	3.76315	4.14323	4.26147	7.81967	6.13822	8.28786	4.68563	7.22682	6.54725	11.4737	7.29972	4.86201	3.31458	3.98362	8.65425	7.35806	6.3003	7.4054	6.72865	4.2251	11.6524	4.79156	7.56462	5.35739	1.67326	6.49482	7.07139	1.08074	1.67826	5.59592	1.0597	6.10764	6.56208	0.962092	1.10483	4.81309	1.13891	5.95933	6.9901	1.19907	2.56697	5.36953	1.80178	8.04043	8.62411	2.28461	1.87153
Pita_unigene918	4.20069	4.10641	2.98627	3.285	1.55443	3.30766	1.63639	1.71946	1.98083	1.89938	0.729703	1.85859	2.56722	1.57116	4.095	1.44179	1.999	2.87521	1.47741	2.09176	1.07972	0.353387	1.56274	1.12836	2.42346	2.83054	4.24622	0.523453	1.49689	2.16329	0.788068	0.854841	1.16804	0.1514	0.117672	0.598554	2.29053	1.96959	2.65567	2.19824	0.876556	1.88534	1.38776	1.15376	2.07187	0.705939	1.19004	1.81988
Pita_unigene9107	3.50919	1.49627	7.379	1.04109	1.57974	2.86777	2.20235	2.56536	3.48481	0.633298	6.69451	4.17401	1.42917	5.87198	1.64683	6.09226	4.50814	4.8107	0.929396	1.39874	0.465591	2.05379	4.69509	1.59886	13.2256	3.37748	3.76889	29.2446	46.9207	10.205	25.8729	18.1249	12.957	41.957	46.8484	9.03267	37.4448	9.11041	29.0237	19.8079	13.4699	11.9243	2.2388	1.66127	0.826624	9.64109	7.09915	1.54881
Pita_unigene9094	2.77298	3.19386	2.31795	2.00564	6.27619	0.69321	1.57884	2.98389	4.47396	4.00551	5.99305	3.12965	1.69085	1.39615	4.49817	4.86754	0.525333	3.13203	5.41238	3.8033	5.38575	4.091	1.86002	2.59496	2.7568	1.2639	0.837661	1.55605	0.854945	0.562586	0	1.91521	2.57493	2.92783	0.746393	1.17842	0.745581	1.13185	2.58619	2.15068	1.45262	1.5789	0.315141	0.845223	3.6194	1.05846	0.831802	1.35386
Pita_unigene9084	1.31495	4.28947	0	1.17364	0	0.366681	2.46131	0	2.16061	1.42657	0	0.954677	1.24861	0	1.67536	0.185021	0.152128	2.57253	0.869302	0	1.73964	0.170315	2.13383	0.326285	2.07496	2.22847	5.16548	1.84101	5.40123	5.49328	1.2619	1.35585	2.68264	1.06509	2.15215	1.92683	0.707695	1.05819	5.28679	0.320038	3.82614	6.91739	0.359232	0.184579	2.23735	0.162158	2.23623	1.55081
Pita_unigene908	8.17968	14.7845	6.60726	12.9906	6.86967	7.08821	6.40823	7.70826	14.0842	14.6118	8.96848	7.33702	12.6785	6.97373	11.989	6.86134	6.55668	6.45914	15.2618	7.60949	13.3995	8.78666	7.65455	8.25726	3.58734	15.4955	0.774673	0.999836	8.11513	0.0353707	1.32502	14.0807	0.655361	0.719808	7.57344	0.105417	1.70037	12.3592	0.767647	0.992103	6.26493	0.111296	1.30102	14.0938	0.787104	1.24292	7.38457	0
Pita_unigene9071	6.51855	10.2989	6.85637	6.87091	8.70933	7.79788	13.3378	9.76412	12.2456	11.791	10.0911	10.3465	11.6464	7.77949	13.1578	11.8927	13.9585	11.6381	8.68578	4.15777	9.07793	7.23986	8.21016	6.8318	8.0407	6.94612	10.2906	4.16611	6.65903	3.86993	5.76134	4.54859	7.52881	4.02173	5.57614	2.74892	4.79461	5.8323	6.27206	6.13054	3.43635	2.62764	8.62229	7.11159	8.91998	5.62788	5.91013	5.23507
Pita_unigene9063	2.35733	1.07866	3.45097	1.1971	1.36599	0.994505	1.91044	3.88906	0.940854	2.59681	4.40505	2.28465	1.44159	3.64565	0.540679	2.08664	2.06933	1.69321	1.87518	4.26715	0.671699	2.10833	2.00205	2.5758	4.69447	6.47282	7.75246	13.086	7.26543	4.9804	12.0898	9.27435	14.6245	14.0502	19.7657	7.91525	4.97642	7.83504	8.25084	16.7385	9.92638	3.97535	1.9349	5.17768	5.10365	8.02965	4.39758	1.90814
Pita_unigene9052	0.977039	1.38956	0.681509	0.549643	1.03232	0.764646	0	0.628431	1.15223	0.433467	0.337085	0.452628	0.426909	0.571848	0.98286	0.467976	0.816734	0.5139	0.202816	1.17667	0.514602	0.295587	0.335187	0	0.254059	0	0	0.847676	0.953233	0	0.614657	0.112557	0.347184	0.318817	0.868191	0	0.307303	0.239372	0.111312	0.451	0.608555	0	0.107803	0	0.419057	0.499586	1.08861	0
Pita_unigene9034	2.78534	3.0193	6.33024	7.30482	7.50098	5.61894	2.89715	4.20192	16.65	9.32419	4.08833	6.07743	15.4216	4.81004	31.3229	5.6617	3.91589	10.0887	2.9885	0.293507	4.68041	1.38364	1.59322	2.06541	3.35558	1.5909	0.59516	1.39813	3.05396	0.141153	2.09857	1.74416	0.47288	0.124789	1.3914	0	0.885914	1.01202	0.884849	0.533606	1.19331	0.942899	0.554227	2.6967	0.573483	1.86261	8.74806	0.398877
Pita_unigene9031	2.36444	4.33067	1.2627	2.13592	3.67324	2.1004	1.11663	0.907519	2.57545	1.26413	2.50043	1.16796	2.93782	1.25562	2.80921	2.48089	2.30705	1.17817	2.12293	0.823209	1.45465	0.939455	1.53069	1.62648	1.43718	1.20958	1.08804	0.984755	1.89711	0.321771	0.372258	0.94363	1.57767	0.219493	0.512792	0.350962	0.908077	1.94658	1.57667	0.781262	0.636427	0.698792	1.78915	1.3329	0.941436	2.03587	2.37229	0.461914
Pita_unigene9017	5.28517	2.79198	7.18612	8.20036	5.92984	2.75583	6.4207	2.91583	3.79709	11.6221	2.92528	4.54994	10.0516	1.95165	4.91061	7.74569	5.12494	8.80775	15.8593	5.18895	6.75358	6.3711	9.08605	5.71953	2.59731	3.59934	7.06151	0.638513	4.09054	1.59474	1.38935	3.07998	2.503	0.836926	0.838376	1.01577	2.97498	6.51419	3.05783	1.21592	1.36331	2.56762	9.41566	15.628	11.5761	5.87797	8.84744	9.88227
Pita_unigene9	1.21824	1.99443	8.02015	1.99396	10.2853	1.6037	0.743408	1.07412	2.35152	0.922025	1.03277	0.704841	0.692566	0.746875	13.0634	3.72481	0.443245	2.38141	0.359788	0.279066	1.06144	0.401696	1.08277	0.196793	1.81479	0.9651	1.16152	0.202763	0.458643	0.797325	0.483392	1.00387	0.575916	0.00811718	0.273391	0.465301	0.210899	1.14035	0.907721	0.0269924	0.0879516	0.660879	0.883855	2.19747	1.50476	0.450769	1.91768	0.965953
Pita_unigene8976	4.74432	5.77886	1.77756	1.98468	2.52792	2.08497	0.600492	1.0523	1.38301	0.974603	0.410021	0.361108	1.48076	1.28975	3.49168	1.25603	0.5308	1.51583	0.787847	1.97185	1.7766	1.16106	0.540031	0.431212	3.13636	7.59444	2.27815	7.81397	10.3143	7.97849	2.5472	9.41946	3.01327	6.39831	10.5941	6.01254	1.21129	1.93287	0.855913	1.44973	2.29657	1.22316	0.406632	1.17228	0.980295	0.250185	2.47984	1.18303
Pita_unigene8972	16.2072	16.0343	21.3764	18.1094	8.47022	8.60995	35.787	10.4605	18.5697	27.3151	19.0366	9.75928	17.5279	9.0567	15.2169	19.2198	9.32483	25.8249	15.7722	7.28458	15.097	12.0215	35.839	5.47504	11.5741	18.2296	15.9658	1.66424	3.63357	15.0104	9.54297	10.4455	9.75676	0.0894437	1.5276	6.0932	9.79661	9.6318	14.4387	0.967137	0.996276	7.22764	26.9699	27.9878	22.791	15.2235	14.4234	13.9889
Pita_unigene8925	0.857458	0.838354	0.61733	0	0.892394	0.593707	0.489931	0.402769	0.728134	0.689524	0.402998	0.145836	0.303077	0.274696	0.330071	0.17826	0.0499995	0.262086	0.353668	0.86638	0.583641	0.701327	0.188043	0.507819	2.25073	1.30398	1.03288	1.33537	1.18682	0.64151	1.99374	0.665247	1.89844	1.7194	1.54516	1.21451	1.54294	0.613541	1.06898	0.876389	1.07597	1.01792	1.71191	0.552461	1.38017	1.15945	0.699101	1.03521
Pita_unigene8905	15.565	33.7697	55.3164	16.0375	10.1284	73.6989	77.6482	2.9022	42.2168	10.9561	6.21534	48.6295	9.17441	4.69689	27.3309	6.46029	87.111	76.8673	12.4668	4.97004	25.4135	2.84527	44.7976	31.1262	49.7637	15.0374	70.7903	7.5787	14.0776	2.56229	27.2179	8.69577	116.917	6.23562	15.696	2.8779	40.8675	12.2649	89.0686	41.9346	9.67642	6.98114	149.376	100.407	118.605	87.6681	44.026	23.9761
Pita_unigene8900	6.89054	8.49043	22.5001	14.1672	24.4509	15.4915	8.62844	14.0621	12.4164	10.4932	9.24384	10.7937	8.45933	9.97926	34.0545	17.3941	10.6828	13.4823	11.1262	8.05331	8.51579	9.18195	7.34959	10.1535	8.07971	4.91253	6.62383	1.78283	7.21418	4.49252	3.43749	3.31174	6.27862	1.29721	3.19936	5.0279	6.1923	6.18238	8.92444	1.43109	3.66988	8.4828	9.65246	11.9166	18.6072	9.35148	20.3216	14.1007
Pita_unigene8894	8.29976	5.48801	7.60227	2.16535	3.13187	2.35041	8.32162	4.24406	8.03132	3.70735	2.79517	2.3935	3.87347	6.90389	7.33022	4.97028	2.13868	8.48955	3.38199	6.69938	6.74648	1.89298	11.6454	2.00589	25.738	4.68041	23.0295	32.4125	13.1609	18.9881	21.9117	4.14716	22.6499	26.8307	17.4115	20.8693	19.3945	3.16205	13.7985	21.59	6.78808	11.3122	27.0486	1.92067	16.5323	11.675	7.32541	10.5132
Pita_unigene8857	2.79387	8.78849	2.85699	5.48954	9.59462	5.61057	2.03682	1.07466	3.02455	5.5945	2.85363	1.10565	2.94798	1.21515	34.0933	7.49346	0.379723	4.84221	0.862488	0.461172	5.17898	0.563438	0.294246	0.539573	5.31705	1.83391	0.711593	0.457333	0.541214	2.04723	0.149441	0.800683	1.19173	0.588372	0	0	1.3195	0.876226	0.46818	0.132257	0.143739	1.47219	2.07763	1.21755	0.923379	0.943224	1.54342	0.142767
Pita_unigene8832	3.73537	2.0604	12.8029	5.19078	9.9948	2.83476	4.65732	9.8469	6.42429	8.27767	10.2605	5.4839	8.27991	7.05771	4.44087	9.81024	2.51087	6.23358	9.02847	8.25238	2.11354	6.77276	4.31815	3.24331	4.35562	5.16216	6.65646	2.23496	3.43735	0.979973	1.7902	4.4941	9.5863	1.17511	2.37637	0.19377	6.04841	8.87795	6.25779	2.65181	2.49781	0.391264	3.57136	7.55443	4.9475	0.893229	0.822486	1.9002
Pita_unigene8780	18.931	25.1969	58.0894	16.2859	35.2376	69.8463	16.372	85.9683	25.1078	20.6164	59.7767	45.3806	16.1003	107.798	21.0529	33.9676	59.6106	22.8963	18.6842	94.0098	30.1602	46.6956	21.7041	62.3727	103.806	38.9191	85.1212	184.581	166.591	48.7511	106.166	63.3447	115.079	135.699	207.73	116.837	58.1169	36.7386	57.0026	89.2208	145.346	68.3123	32.4017	17.5008	58.0963	63.457	74.0885	57.826
Pita_unigene8767	1.52707	0.0487145	0	0	2.33872	0.0471313	1.11637	0	0.0429248	0	2.61673	0.0996437	0	0	0	1.55234	0	1.26263	0.0919455	0.0465975	0	2.10123	1.77509	0	30.4397	3.54451	29.1354	0.557429	15.7723	15.1051	39.3429	4.74777	35.0951	0.792572	19.9745	16.1058	39.642	4.24175	38.4953	0.764062	22.7785	16.9694	25.6778	3.92722	27.8629	0.629648	19.9193	13.4348
Pita_unigene8760	0.670922	0.669274	0.287199	0.496967	0.627538	0.390718	0.982853	0.447816	0.689146	0.847183	0.533663	0.31683	0.820473	0.369073	0.675365	0.979405	0	0.592284	0.444677	0.159801	0.781935	0.540119	0.311663	0.172926	0.380319	0.158158	0.180158	0.190497	0.490345	0.121933	0.185582	0.180974	0	0.122668	0.276244	0.107157	0.34523	0	0.181355	0.383075	0.226616	0.266055	0.330784	0.225783	0.359267	0.482768	0.693099	0.364091
Pita_unigene8738	51.3966	68.1985	96.6248	64.9105	47.618	64.1301	73.0092	71.1124	92.0212	92.0377	105.345	77.4112	40.1951	60.3794	57.027	59.6229	54.1056	41.2991	52.4107	36.8403	69.1824	62.8796	54.8478	65.5264	41.2211	91.5938	80.0632	8.29985	30.9562	79.7578	16.091	38.8368	37.075	4.56001	14.3498	27.8245	26.1712	75.4123	61.015	31.7567	24.7839	39.1856	65.1718	105.468	73.7737	82.0197	81.7958	51.3186
Pita_unigene8718	2.12444	0	0.29327	0.110377	0.106347	0.104058	0	0.105165	0.094213	0.805569	0.410515	0.108227	1.61479	0.368996	0.570371	0.418739	0.175335	0.491338	0.0984318	0.419193	0	1.35263	0.20203	0	0.822796	1.24702	0.975172	12.4742	2.13021	4.09563	1.6457	1.09573	0.697226	31.6696	1.11903	2.55721	2.82004	2.04294	3.10002	10.9587	1.96778	0.710024	0.101632	0	0.525972	1.02444	2.22626	0.0982125
Pita_unigene8707	14.5804	2.07682	10.2324	6.13888	5.72825	8.80094	10.5736	16.0841	1.94152	6.62453	5.7094	11.0725	6.72095	16.0375	1.95629	5.99248	9.50404	12.7868	5.7086	21.4704	3.27733	8.24581	11.9659	13.0052	18.3928	9.07002	6.58786	32.9724	21.8295	9.00631	33.6251	11.9935	11.5934	21.4099	37.9041	24.8304	13.8083	9.39594	6.71756	11.9183	19.1859	8.1397	12.6848	6.09995	6.56462	6.00234	11.2114	8.23901
Pita_unigene870	1.8236	5.42555	0.238889	10.511	5.17186	1.68457	2.13113	0.395931	2.53199	6.84086	4.19537	3.17734	4.82838	0	4.63532	7.06463	2.85564	1.74141	1.32341	0.20756	0.861092	0.916194	0.892857	0.912443	1.48888	1.16768	0.521784	0.183545	2.25234	0.735745	3.76013	3.34073	0.754251	0	0.607286	0.882936	1.95884	3.95895	0.623324	0.546333	2.24469	2.2038	1.38161	3.5119	1.66146	4.37134	7.78977	2.01791
Pita_unigene8684	0.580627	0.257873	0.346231	0.245057	0.431934	0.299326	0.348804	0.188797	0.241246	0.517214	0.148254	0.0314061	0.364203	0.119194	0.491533	0.181909	0	0.144164	0.199786	0.0340908	0.143113	0.163315	0.432838	0	2.94894	1.68636	0.610407	21.2084	3.47991	0.789178	8.56197	6.08071	0.850867	50.3377	17.7114	1.96218	2.04617	0.520922	0.636914	1.30128	2.0713	0.326656	0.112323	0.417774	0.204325	0.0822346	1.6103	0.0547034
Pita_unigene8664	2.4743	2.15545	1.66438	1.0231	2.90376	1.36729	2.75151	0.550862	1.13626	0.873254	2.07657	0.535259	0.458634	0.129904	2.39128	2.72185	0.91386	4.41727	0.636465	0.134448	0.465042	1.58532	5.74581	0.646036	1.19298	0.917896	0.768235	0.128399	1.2023	0.380383	1.15055	0.296793	0.674789	0.116735	0.161359	0.666719	0.415515	0.665419	0.606832	0	0.319971	0.51268	0.928771	1.20845	2.36168	0.516093	3.09601	1.17719
Pita_unigene8653	2.03331	0.252531	1.36737	1.49524	1.02607	1.61133	3.82495	2.06173	0.911414	1.72531	3.22501	2.61749	1.65404	0.73492	0.0784522	3.18414	2.58162	3.28926	1.33071	0.326403	0.728138	0.554456	1.71423	0.671683	0.819525	0.101478	0.31468	1.0807	0.611547	0.634181	0.849508	0.92814	0.673349	0.207867	0.598839	0.281548	0.579927	0.517339	1.3409	0	0.427023	0.658656	0.823206	0.183215	0.683683	0.544821	0.327707	0.485222
Pita_unigene8620	0.327532	0.1492	0	0.128853	0	0	0.275856	0	0.61531	0	0.275108	0	0.187033	0.346892	1.41425	0.131816	0.63106	0.184961	0.214085	0	0.40125	0.380053	0.218877	0	0.32168	1.04494	0.257137	1.55589	0.472478	0.21125	0.340928	1.09527	0.115541	0.390553	0	0.0930431	0.320521	0.752911	0.191565	0.0882993	0	0.680125	0.316991	0.329328	0	0.48065	0.285447	0.832094
Pita_unigene8613	41.192	51.3643	0.279131	118.456	0	30.6146	83.7194	0.559799	74.741	141.116	0.301655	37.5842	141.57	0.522918	74.6597	0	61.3245	88.4908	75.9656	0	66.9508	0	84.4391	40.8747	5.47133	0	0	0	0	0	0	0.271838	0	0	0.537987	0	0	0	0	0.23838	0	0.527381	0.296386	0	0	0	0	0
Pita_unigene8573	431.553	656.604	853.126	609.02	939.141	928.33	1691.84	2933.97	2263.21	1882.8	3086.91	2026.32	1700.91	3617.53	2167.95	2876.57	2221.45	1699.37	1422.31	1958.2	2107.51	2433.63	1929.16	2130.38	2788.81	1300.62	1071.55	2494.63	3282.79	1908.36	5522.28	2992.35	3651.79	3235.77	6011.76	4816.29	4422.13	2921.9	2736.76	3667.19	4833.35	4400.74	2345.35	1530.03	1798.75	2030.31	2811.21	2296.74
Pita_unigene8559	1.75356	1.21625	2.10875	1.6185	2.89914	1.60703	0.443036	1.8059	0.596218	0.699738	1.1764	1.02745	1.34794	1.46267	0.96349	1.78674	1.18259	1.13336	1.56552	2.60501	2.14095	1.35398	1.57064	1.16844	3.98066	2.52419	1.49263	8.3669	4.48523	6.22658	1.84466	2.58347	1.41975	9.56757	3.43027	5.25814	5.8621	2.8414	2.46353	4.7419	5.13063	6.63717	1.95327	0.980581	2.51617	1.19435	2.03305	2.6713
Pita_unigene8525	18.3127	29.9705	25.7208	23.3788	23.1151	22.7858	31.1371	25.8664	36.1308	27.6216	30.0913	28.6998	38.3675	32.3207	39.2151	28.5309	33.0203	29.572	16.6285	20.0389	36.8536	17.7416	18.8915	16.1259	16.4558	14.466	15.2296	16.7399	17.6413	12.9633	8.97284	9.04527	12.7286	14.5419	10.4715	7.02394	25.7681	21.0068	18.5663	31.1126	19.0064	19.3039	18.9996	13.1685	13.9744	15.2595	16.0956	14.6836
Pita_unigene8509	0.196382	0.457391	1.35868	0.20383	0.324098	0.578428	0.308523	0.454031	0.232492	0.124019	0.757974	0.2671	0.124455	0.567668	0.4721	0.45254	0.109199	0.73181	0.2428	0.836792	0	0.133367	0.249716	0	1.95741	0.486231	0.971719	0.0779618	0.316592	0.398917	0.764205	0.472501	0.499796	0	0.313975	0.39082	2.74408	3.31057	2.42592	0.522145	0.363984	2.54927	0.877177	0.888806	0.482566	0.522448	1.0796	0.583338
Pita_unigene8450	4.52563	8.84937	4.69007	2.31545	0.595275	0.901831	1.75846	3.37262	12.4546	1.11837	1.00379	1.55038	0.754826	3.23406	40.5856	6.92094	2.32826	1.60433	1.05973	2.64028	2.27427	1.78402	2.75474	1.0936	4.3231	1.47804	1.77153	1.44495	1.35865	1.73704	2.02143	11.1932	3.46744	0.53625	0.432094	1.79761	2.82452	3.90643	3.70864	0.495829	0.429328	1.13762	0.762379	0.283832	0.180621	0.686348	0.873777	0.228266
Pita_unigene8379	5.48953	12.8145	8.3625	8.58599	16.2492	11.4272	3.5634	9.90686	13.6412	7.06769	15.3021	7.79212	8.19763	10.0344	16.6771	18.6835	9.3569	5.01445	7.87763	6.60904	16.5154	11.8925	2.49919	5.48688	41.3501	16.8325	19.8106	29.9291	64.8959	33.8612	41.504	21.799	29.3307	17.1876	60.0435	30.0874	40.753	21.4976	20.4521	20.5351	55.3439	23.9716	5.95366	8.33115	5.71823	4.30729	12.4735	11.2619
Pita_unigene8360	171.454	91.0609	49.8	83.6195	38.3993	143.233	89.1806	100.324	77.0101	78.0114	98.119	140.606	89.7599	105.664	45.9125	56.9724	193.458	72.8118	85.931	112.587	75.7552	95.8867	159.295	277.023	180.085	110.818	190.79	878.925	296.498	187.886	485.419	319.246	152.987	1696.04	572.967	400.569	237.828	113.67	161.425	438.024	350.607	136.124	178.263	124.347	143.613	265.839	198.532	91.1772
Pita_unigene8356	1.36494	2.19401	0.953685	0.579149	2.31713	0.211472	1.22015	0.822002	0.843906	1.12739	1.55228	0.746614	0.781717	0.576338	1.07158	3.17216	0.302893	1.20792	0.669121	0.560661	2.03475	1.3222	0.465134	0.305756	1.11805	1.24604	0.982645	0.053724	0	0	0.175197	0.608017	0.789693	0	0.0519235	0.0248394	0.283275	0.430905	0.248952	0.0740876	0	0.0521988	0.683118	1.25722	0.169551	0.395173	0.162792	0.526585
Pita_unigene8323	0.843067	0.475787	0.488357	0.550881	0.609594	0.260837	1.57653	0.210492	0.37193	0.653753	0.665767	1.01038	0.65625	0.184092	0.438871	0.685153	0.933034	1.18971	1.18184	1.28856	0.444303	0.822887	2.53013	2.05257	0.669348	1.25128	2.96073	10.1851	1.34337	0.099618	2.80067	5.82324	10.5082	21.3477	4.55924	1.47064	0.828661	3.59657	4.85717	2.88709	3.04966	0.408692	0.508245	4.15377	6.29476	1.87143	0.585225	0.456156
Pita_unigene8232	8.24934	1.4089	1.46109	4.60582	4.04412	3.07045	1.11479	1.2332	2.74035	3.68946	3.10976	1.15544	1.77037	1.39743	1.78337	3.7879	1.45778	1.77226	6.07412	3.05764	2.31346	4.69211	1.87001	2.47074	6.03021	3.39562	4.48025	7.34531	7.45087	3.4609	10.5173	6.71133	8.09588	7.68869	11.8535	6.29785	4.50096	2.80604	6.12867	3.9244	6.38309	2.55458	5.76352	3.50549	5.22684	3.67375	6.15796	3.93161
Pita_unigene8217	11.0288	10.2436	8.14245	13.7856	8.26319	5.35334	8.67412	11.1038	9.52369	18.2653	13.4346	5.88119	14.73	7.96035	7.52165	11.2842	6.84182	6.88849	20.0907	12.6758	6.93408	12.1446	7.73301	6.73471	0.185051	24.9027	0.0776054	0.0899332	2.78754	0	0.0846511	24.0903	0.0455921	0	4.07578	0.151682	0.0803445	25.8751	0	0.0738847	4.1745	0.122998	0.120001	28.541	0	0.080742	3.27224	0.115957
Pita_unigene8215	0.550607	0.877153	2.38039	1.1998	2.85647	1.62283	0.675232	1.20056	0.244516	0.156461	1.91211	0.898923	0.471154	1.24104	0.790585	1.845	0.497459	0.359735	0.255335	0.811459	0.767902	0.803115	0.228577	0.622853	1.50888	0.641789	0.354496	0.76429	0.672539	2.06641	3.64715	0.113545	0.300064	0.972013	1.37392	1.52241	6.02398	3.74478	5.2161	11.558	10.6152	12.194	0.263537	0.588949	1.36023	1.80578	2.52242	0.61439
Pita_unigene8202	4.76131	4.25628	0.648973	1.89713	2.39371	0.940799	3.57574	1.57574	2.15249	2.62112	4.9386	1.90657	2.57066	1.06856	3.2619	4.46617	0.262908	1.91079	3.99868	1.20815	2.88512	2.66322	0.689363	0.468927	1.78067	1.65789	0.510747	0	0.362272	0.330367	1.38382	0.545593	1.28062	0.169908	0	0.323644	0.168527	1.22953	0.589315	0.452001	0.178149	0.855262	2.30875	1.53697	0.729542	1.10727	0.629715	0.990221
Pita_unigene8183	5.22722	4.47455	3.24586	2.98757	4.76579	3.84861	4.20362	3.43454	3.4157	3.06731	4.37052	3.53631	2.50758	2.05059	4.01731	4.00775	2.62003	3.81694	3.77321	5.75727	3.26468	4.16097	3.69759	2.64495	6.51498	5.34983	4.69024	36.6638	4.32925	5.58738	5.17793	6.26378	4.37271	23.0313	5.90435	4.63965	8.1577	7.83444	5.54421	25.8258	11.4766	7.21273	3.12321	3.91969	3.65914	1.99459	2.46864	4.19116
Pita_unigene8165	2.4634	1.6634	1.49802	1.48257	2.27557	1.1872	1.81717	0.867257	1.24835	1.07851	1.07196	1.12299	0.970281	0.6765	1.54902	1.30564	1.00825	2.22933	1.09415	0.739247	0.99893	0.822685	1.88941	0.714988	1.02835	1.39558	0.597821	0.145046	0.99448	0.63248	0.492773	1.0922	0.446206	0.178335	0.420241	0.364854	0.518072	0.917281	0.681668	0.169656	0.343947	0.641049	0.900573	1.19304	1.16267	0.687281	0.798938	1.02718
Pita_unigene8164	1.76731	1.76958	0.961354	1.18455	4.1296	2.32665	0	0	0	0	0.308118	0.837986	1.79852	0.554438	2.51042	2.60028	1.19551	2.28138	0	1.1857	1.54998	2.76129	0.891453	1.62954	0.290789	0.492732	0.694368	4.66014	2.25387	0	0.801593	0.803495	1.37866	3.03126	0.936836	0.265715	0.647524	0	2.19776	0.217568	0.465761	0.41133	0.543827	0.230715	0.650334	0.478329	0.287584	0.250927
Pita_unigene8163	1.18094	0.956768	0.761261	0.793921	0.889865	0.851812	0.694393	0.851894	0.575631	0.540205	0.162942	0.652597	1.04793	0.992469	0.97638	1.37314	0.409255	1.48562	0.71586	0.518291	0.634202	0.562558	0.67459	0.470418	2.11745	1.23524	0.947638	2.17542	0.8579	0.969071	2.4008	1.91494	0.92115	2.06219	1.49421	1.63565	1.60787	1.41255	0.620754	0.958493	0.548494	1.32948	0.96022	1.05219	0.529414	0.506737	0.467536	0.931631
Pita_unigene8130	68.2137	159.752	54.8522	73.1966	290.769	96.6139	52.6019	95.596	54.6865	26.1823	91.7547	46.0875	24.8494	81.3942	132.657	114.265	39.0867	51.9587	8.13243	35.3979	51.498	45.1459	13.5098	12.475	80.5211	24.1212	20.3652	154.919	22.7535	3.42256	25.157	21.0841	5.50415	61.2219	9.01427	0.932249	1.17254	22.1784	3.54093	32.0209	4.32366	2.66671	68.4659	37.8311	4.80002	109.509	41.1521	10.6534
Pita_unigene812	12.2699	4.45869	12.3472	7.28636	13.2661	10.9083	17.4107	17.1368	13.5847	8.09826	13.06	17.6216	14.3039	10.9627	18.6876	15.4852	11.5706	23.5023	8.61111	7.84275	14.9639	7.98137	15.7231	7.44401	8.97985	11.4633	14.659	0.50305	7.47282	0	7.0704	10.3681	14.1189	1.0281	6.9508	6.7555	5.26378	10.562	13.6973	1.19923	6.70846	2.05686	4.43646	11.6073	14.5375	0.162947	7.46468	5.16948
Pita_unigene810	1.78825	2.12003	0.893345	1.33796	1.74231	4.18944	3.16651	1.77646	2.83018	1.79509	2.79103	3.78227	1.95185	1.10178	2.74896	5.00709	3.53844	3.51244	0.82456	0.615067	3.39348	1.91452	3.18077	2.60356	0.662307	1.0084	2.45585	0.866528	1.97197	1.79229	0.417918	0.663435	2.13076	0.806424	0.665229	1.68611	0.369118	0.711867	2.07933	1.54303	0.263119	0.550427	1.01315	1.05333	2.23687	1.11162	1.28282	0.323932
Pita_unigene8097	5.17443	2.77838	3.63663	2.11165	3.33239	3.59782	8.55396	5.01278	5.00843	2.42315	2.24356	8.48265	1.49242	4.0325	2.86907	2.23462	5.39329	8.13519	1.6715	3.82814	3.08086	1.53682	5.82514	5.46356	2.1897	3.69795	3.68929	1.67119	1.42021	2.6733	1.47192	1.8584	3.29587	0.333913	0.836855	1.44718	2.4332	3.9537	4.15971	1.88511	1.5088	2.06831	2.61568	3.90202	3.50504	3.03843	1.16471	2.37788
Pita_unigene8060	14.3818	32.9652	18.2196	21.9311	32.5205	18.9535	27.5341	35.94	40.2719	28.2026	21.058	27.4125	30.762	45.1244	52.8445	26.1704	27.4284	26.2788	13.278	19.9684	66.7803	14.1403	14.6808	19.1535	25.6396	29.0396	19.6615	20.2472	11.4452	10.8937	10.4966	26.277	15.6151	12.1902	9.62198	11.6354	6.77738	27.2331	15.0621	19.9122	9.47018	10.2419	25.2977	22.1591	11.8472	27.9617	12.4417	13.0676
Pita_unigene8042	8.54123	3.51908	3.06133	3.12772	3.38496	1.96759	5.94928	19.9092	5.67623	7.75564	1.53787	5.61184	7.1108	14.7269	13.7007	6.50129	1.72975	10.6831	15.7656	59.5403	14.291	8.40797	11.2765	9.17634	15.6345	11.1916	5.36973	15.6837	6.94348	19.634	17.3652	46.548	39.665	48.5143	43.4786	32.5063	40.3838	38.3969	23.7621	59.4006	43.475	30.3241	13.7834	30.4624	21.084	10.7139	11.5631	34.9864
Pita_unigene804	49.904	72.684	101.094	53.2091	55.0915	54.0232	113.725	92.3268	124.688	107.674	270.606	132.828	111.075	110.426	85.5798	156.951	81.4652	137.284	62.9137	29.9061	80.438	90.5093	99.822	76.0684	50.9597	92.3549	72.2186	17.965	44.3369	33.7908	43.2441	94.1885	104.393	15.8701	63.9088	45.0574	30.6203	59.7396	54.7029	15.7959	22.2494	34.5831	126.187	169.836	95.8656	98.2938	109.498	61.7832
Pita_unigene7981	0.18647	2.22845	0.900437	0.483614	0.551085	1.23724	0.572045	0.600767	1.201	0.309074	1.16894	0.285473	0.310303	0.565627	1.33939	0.643246	0.547111	0.305032	0.389192	0.503482	1.43076	0.552697	0.222608	0.567982	2.06629	3.99669	2.31607	0.740151	3.45765	2.36093	0.909143	1.92258	1.8281	0.580809	2.68541	0.815735	0.621256	2.22012	1.97377	0.437642	1.94465	0.538801	0.624811	1.99298	2.21036	0.496786	2.33695	1.12816
Pita_unigene7975	9.36603	2.89566	1.33428	1.55352	0.677498	0.925323	3.78682	1.84657	2.06242	2.31567	0.858699	1.53179	2.20983	1.52253	1.0753	1.14597	0.466438	4.79159	3.65463	2.32792	1.23283	1.52844	3.97388	1.35357	1.23211	4.27834	1.45533	2.61432	1.7326	3.92424	2.3757	5.05383	2.02632	3.68452	2.72655	3.8489	3.85016	5.26575	2.93699	5.44271	4.67326	6.17571	1.74131	2.35266	0.854669	2.97099	2.71087	2.47919
Pita_unigene7962	0.447148	1.19738	1.87624	0.75343	1.97219	0.770098	0.158496	0	0.248404	0.264658	0.350206	0.0856145	0.0265833	0.0242063	2.286	0.523411	0.259003	0.340743	0	0.0547975	0.0520187	0	0.026728	0.0486572	0.867598	0.118026	0.077191	0.0833509	0.26834	0.47137	0.0273139	0.0288111	0.182421	0.0805114	0	0	0.213093	0.0634249	0.225523	0.143158	0.0777432	0.458891	0.080282	0.216854	0.386173	0.299065	0.982216	0.0782081
Pita_unigene7955	19.5793	11.0192	20.756	11.3336	12.9561	13.4449	10.5168	6.8395	5.75848	4.76603	11.558	8.05518	6.91533	9.37324	9.12156	11.8906	8.40154	15.4695	2.72434	3.75084	4.25534	3.09759	5.43163	3.21303	4.71951	7.85319	8.07164	2.08168	2.95139	3.5414	1.9092	1.82645	2.28513	0.589595	1.17266	1.58854	2.61815	4.28165	4.87568	3.22263	1.25322	2.2001	2.45461	3.44241	3.19944	2.44253	2.61738	2.56006
Pita_unigene7949	137.009	148.786	131.195	138.629	104.592	126.032	115.214	55.4392	85.914	84.8053	64.1035	80.8888	102.864	64.7739	86.2769	83.8123	67.1011	95.314	65.6757	45.1586	60.1837	55.0228	53.0684	47.3428	64.0955	83.8407	115.705	44.8341	59.5037	114.07	20.6824	52.2633	58.7947	7.21754	21.356	51.1222	43.1471	49.6553	55.1855	44.9091	41.6213	87.7957	45.2869	32.9662	65.9362	43.6286	39.4955	76.3487
Pita_unigene7883	0.149634	0.172484	1.26461	0.153436	1.52503	0.295462	0.279546	0.486047	0.414282	0.37494	0.209188	0.180165	0.275759	0.506496	2.23831	0.522309	0.175408	0.672957	0.193977	0.102121	0.545219	0.0853898	0.168734	0.116665	0.35709	0.143561	0.217213	0.132894	0.128817	0.120467	0.249491	0.108025	0.262823	0.181954	0.0670641	0.171384	0.298996	0.0530444	0.568468	0.0964809	0.0852931	0.123839	0.244966	0.146504	0.153283	0.148988	0.250122	0.122314
Pita_unigene7872	0.237357	0.889353	0.86858	0.830422	3.88529	0.921601	1.0347	1.07905	1.18838	0.954138	0.270704	0.513844	0.958035	0.799478	4.33287	1.55068	0.727753	1.27086	0.261815	1.14898	0.593975	0.548962	0.39212	0.829822	2.39671	1.44787	1.09773	4.32982	1.67456	1.34553	5.07572	2.0151	0.882907	6.12539	2.33146	5.95084	1.3928	0.838477	0.974891	1.16825	1.48305	0.929181	0.449583	0.544448	0.365413	0.46561	1.03321	0.535072
Pita_unigene7865	2.71901	1.63722	2.06635	1.70295	2.69538	1.22715	1.25018	1.68582	1.93057	1.78802	1.54671	0.810036	1.29338	0.866555	2.61524	2.95959	1.30769	1.70286	1.36697	1.07291	1.17778	2.03476	1.62639	1.15078	4.77454	3.42481	2.12163	5.58025	3.4453	3.51943	5.61644	4.57426	3.34624	4.50116	4.15658	3.86851	5.38439	4.02959	3.56279	5.75607	3.90504	5.42416	2.71238	2.23248	1.71391	2.61526	2.61857	2.22167
Pita_unigene7829	1.54193	1.13099	1.04271	1.52796	0.481421	1.6217	2.65488	0.128054	0.18849	0	0	1.52459	0.312275	1.85335	0.687517	0	3.16004	0.000146085	0.352413	0	0	0	0	0	0	0	1.18162	0	0	0	0	0	0.281403	0	0	0.0602788	0.646625	0.541394	0.0821426	0.451784	0	0.768874	0	0	0	0.927572	0.38823	0.103366
Pita_unigene7805	7.32227	5.95621	3.79443	5.83164	4.01845	5.72589	6.32529	3.47557	5.86279	5.07952	6.76432	4.89377	4.16754	1.25152	3.33249	5.53948	3.41041	4.71951	6.5525	2.5831	4.98676	5.12476	4.52902	6.82064	2.57092	4.58766	4.60105	1.43204	1.0798	4.30517	1.9598	2.81787	2.41614	1.03726	1.08892	2.32803	1.07951	3.50753	5.19737	2.68425	1.38612	3.27548	5.77551	6.56644	5.90992	6.72411	3.8242	4.12529
Pita_unigene7801	0.809077	0.536621	2.89503	1.12047	1.25462	0.705089	0.845912	1.3354	0.717939	0.76672	1.12844	1.09963	0.854281	0.702216	0.8857	1.5946	0.745045	1.58465	1.08321	1.68309	0.75134	0.245472	1.02704	0.547362	1.19408	0.861465	0.0825735	0.177682	1.09748	0	0.348826	0.278174	0.687573	0.0857725	0.0861441	0.166234	1.53587	0.712323	0.362022	0.0766622	0.249889	0.172074	1.37644	1.31563	0.97868	0.553588	0.359296	0.666136
Pita_unigene7782	4.5988	6.54899	5.579	3.36672	15.898	2.86705	3.1441	3.51834	12.144	7.8269	2.82731	2.12987	8.44113	2.63228	15.4344	10.1974	2.24369	5.12607	2.615	1.44348	8.24595	2.85216	0.596431	1.36349	7.51787	3.45708	4.98965	0	0.364523	0.491406	0.80978	2.04847	1.6005	0	0	0.0967695	1.58579	4.96654	1.26226	0.712912	0.193623	0.598954	15.9005	6.53505	2.58749	3.85002	1.25186	2.41629
Pita_unigene7725	1.87193	6.66908	9.59785	6.88005	20.5922	1.73879	0.637099	1.13	5.47088	1.77894	0.895805	0.231474	0.879068	0.613872	30.8468	4.05358	0.545073	1.75648	0.67695	0.282501	1.27784	0.678588	2.15532	0.301235	3.99116	1.35265	1.14877	0.128733	0.621889	1.10704	0.189815	0.400668	0.105733	0.0310859	0.0933414	0.0297899	0.274462	0.470804	0.484435	0	0.295064	1.36244	1.32143	3.91601	5.15479	3.01274	9.02616	1.92222
Pita_unigene7681	0.669567	0.84759	1.4627	0.276074	0.991474	0.744094	0.881104	2.70874	1.4687	2.18653	3.4529	1.15732	1.12566	1.59478	1.81879	2.38556	1.1219	1.08031	0.578092	2.28688	0.238935	1.1949	1.33144	0.505565	0.723464	0.886077	0.982849	8.30062	1.47967	1.07838	3.41749	2.80032	1.00158	17.7742	2.44152	1.59006	7.44939	4.0917	9.0367	16.0661	6.3705	2.22722	1.94152	2.41842	1.96561	4.87716	4.83389	0.24848
Pita_unigene7602	0.63824	2.40396	1.12648	1.57596	2.45214	1.01532	0.196424	1.59441	1.16768	0.791589	1.26118	0.310739	1.40644	2.40927	2.80588	2.19796	0.876773	0.660283	0.467977	0.477414	1.98591	0.78386	0.21744	0.309947	1.02412	1.55197	0.682591	0.533475	0.563752	0	0.997018	0.923534	0.878292	0.38244	0.425323	0.226698	0.419567	1.99718	1.26443	0.14455	0.36322	0.449369	0.53787	0.733189	0.996562	0.162604	0.153075	0.26097
Pita_unigene7598	0.142588	0.635672	2.57681	0.752851	2.2136	0.311504	0.149893	0.265368	0.643775	0.131283	0	0.0405051	0.225147	0	7.30171	0.68801	0	0.422346	0.147249	0	0.305562	0	0.0758297	0	0.345521	0.0839179	0	0	0.0516517	0.186007	0.0774488	0	0.0432018	0	0	0	0	0.0450046	0.0800182	0	0	0.30467	0.0504028	0	0	0.376131	0.876884	0.480513
Pita_unigene7568	37.4477	26.1659	27.5705	49.3416	40.4721	59.7423	45.6422	29.3747	29.7701	44.5071	24.6195	53.7432	69.5826	18.1158	46.0783	45.7924	56.7576	37.0529	46.4272	22.0478	47.4591	35.2851	44.3788	43.6347	10.3539	18.262	16.9526	2.26869	12.1601	21.0986	13.3021	12.7642	3.88301	2.75768	6.23029	13.3624	15.5236	9.08429	7.48103	0.604912	1.99002	12.2131	16.2876	16.226	33.8733	9.31931	19.405	22.7259
Pita_unigene7565	14.6535	10.9681	16.4025	19.1214	12.8902	15.1746	16.4423	10.0955	10.9712	11.1293	15.7319	11.8989	13.6276	8.26668	9.39214	8.53837	10.3154	13.1819	11.3276	6.46956	10.1144	8.44729	13.2471	8.74245	33.5483	25.4091	19.4177	50.8504	38.3602	17.4161	39.6338	47.8905	28.4095	72.0336	76.6717	28.0931	14.6511	12.3837	9.52302	12.5848	15.7625	7.72321	8.02899	10.6107	8.32969	11.9506	15.1082	8.19267
Pita_unigene755	0	0.558358	0.616148	0.258206	0	0.00805183	0	0	1.99558	1.27	0.962832	0.907648	0	1.93671	3.37894	4.08704	1.61013	0.00239845	0	0	0.548755	0	0	0	1.4059	0	0.198248	0.695603	0.533955	2.56053	3.15501	0	1.34954	0	0.391542	3.55414	1.74949	0	0	0	1.45777	2.47457	1.43567	1.56282	1.10625	2.56493	2.07913	2.057
Pita_unigene7540	0.565891	0.698122	1.80912	1.39704	2.69327	0.556951	0.967977	0.32072	0.598816	0.842127	1.19484	0.275182	0.897152	0.443455	1.40498	1.38127	0.204387	0.657229	0.475129	0.211333	0.677159	0.541188	0.360835	0.258047	1.19513	0.540498	0.446597	0.133963	0.0940897	0.37874	0.579486	0.444486	0.43971	0.02588	0.181262	0.123874	0.282542	0.458691	0.299012	0.0230068	0.0999517	0.182224	0.309646	0.313617	0.425536	0.0721081	0.351804	0.175979
Pita_unigene7493	10.2995	1.71823	1.81337	0.0682014	1.3014	2.51599	1.23875	8.91127	1.89873	6.97337	3.73431	2.84311	2.73037	9.24557	1.93724	5.36832	5.0662	1.10183	0.36558	5.27354	1.31462	5.54584	7.20641	1.21952	6.29352	6.80807	4.25845	11.2005	4.39785	15.8952	40.2426	13.2941	3.79858	77.448	35.0028	19.9365	36.1352	7.46553	81.3605	68.2352	10.3948	8.51693	1.99204	2.64342	5.04991	7.64851	16.5925	1.4646
Pita_unigene7473	27.4362	25.9689	40.2399	23.2866	33.6468	22.7146	22.1599	43.1844	21.6007	25.3439	25.5725	21.0336	23.8212	25.5957	15.7091	33.6391	20.2612	24.8466	31.6861	43.3489	13.1322	31.013	21.2842	20.1407	2.19243	1.80974	17.938	11.6548	25.6931	3.28549	2.29389	1.3866	18.2388	7.94434	22.0484	2.28866	1.72865	2.56861	14.0948	10.9221	20.3126	1.88956	2.66543	3.95853	20.6386	24.9193	36.7801	3.40056
Pita_unigene7413	61.076	50.5797	55.1607	44.3512	24.469	38.3235	125.198	57.2915	80.6893	66.0931	79.9221	75.9908	67.9414	67.3107	49.9021	100.027	143.584	93.505	42.897	31.1293	54.1221	64.4075	95.7046	60.4688	32.6979	28.5343	45.8589	16.3481	48.8998	33.2868	42.8412	25.7814	35.8557	15.4392	27.6052	33.4687	47.7857	24.3273	78.5591	24.7367	25.5138	40.0801	98.3238	45.7823	73.2872	113.808	96.6847	67.7633
Pita_unigene7402	5.42431	6.53406	1.26198	1.54423	1.63338	2.85885	3.07361	1.56114	5.25532	1.83594	1.3438	1.99476	1.86724	0.952164	7.69498	2.25017	2.48277	4.00518	1.58636	0.966604	4.79873	1.50118	2.99396	2.12592	0.801897	2.25176	0.957459	0.521312	2.43136	1.55688	0.44288	1.82951	0.664939	0.285783	1.90768	1.04354	0.77163	2.62084	1.40227	1.13342	3.09102	2.52432	1.53366	1.80865	0.638608	1.01189	3.82328	1.06398
Pita_unigene7395	138.728	129.382	147.923	187.925	215.173	288.121	226.505	281.135	219.828	259.743	308.076	443.144	259.604	367.548	351.828	282.184	387.97	226.028	271.33	240.729	345.921	347.918	324.566	481.176	367.852	366.812	179.78	1161.29	685.248	183.335	724.603	904.078	675.524	1616.23	1391.51	811.851	686.566	447.166	387.315	886.911	1142.92	489.013	188.884	334.197	302.519	367.899	407.449	268.117
Pita_unigene7383	0.387453	3.53814	7.79122	3.13485	4.7086	7.39874	5.2911	10.9034	5.93828	10.5047	29.4153	12.8371	7.3662	11.1215	5.27539	14.9725	18.2188	6.86307	4.52228	2.46212	2.00829	4.66444	4.4923	8.03163	6.86039	2.0545	1.57918	0.687717	3.57009	0.889613	7.74648	4.79918	3.58724	0.920499	1.44643	2.64673	7.21423	4.73953	4.74914	0.388286	0.605351	2.09778	19.329	16.1252	2.75136	12.132	10.6387	1.76335
Pita_unigene7353	0.274024	0.0682588	32.875	23.5286	35.1203	35.9473	0.0648365	22.0671	0.183968	22.7332	30.6749	27.2147	24.1391	21.3354	0.321136	32.0716	23.8743	0.202298	20.1088	28.039	0.450689	32.1286	0.193395	22.7205	0.0783441	0.729721	0.126763	0.27261	0.240398	0.256453	0.136513	0.359414	0.442193	0.335521	0.614568	0.316417	0.326633	0.623159	0.629361	0.175707	0.255022	0.19646	0.337839	0.605711	0.0690106	0.311587	0.21279	0.128951
Pita_unigene7349	0	0.751682	0.66616	0.336867	0	0	1.65961	0.819681	1.45592	0.50412	0	0	2.68325	1.61919	0.606337	0	3.21157	0	0	0.824024	1.54933	0	0	1.37077	1.19991	1.51016	2.12174	0.887121	2.26435	1.44551	0.996436	1.64466	1.06921	0.308829	1.41531	1.32541	0.228783	1.40293	2.12399	0.76774	1.51816	2.25516	1.54588	0.432151	1.67904	1.39472	0.657331	2.2611
Pita_unigene7328	0	3.53026	0.0153876	2.77954	0	2.96426	2.43347	0.000172336	1.41606	1.57053	0	0	2.58505	2.35759	1.77935	1.38956	7.23509	1.30773	0	0	0.650767	0.379822	0.457102	0.77359	1.74751	1.82423	2.16817	4.18169	1.78581	3.35319	3.35557	0	0	0.918045	0	0.732511	0	0.00763243	0.188861	1.34442	0.175057	3.55901	0.189434	9.70136e-06	0	1.69836	1.44488	0.33523
Pita_unigene7302	2.41161	2.81464	2.64299	2.4489	3.36609	5.25498	4.0186	7.51505	2.74055	5.20875	5.15229	7.53037	5.53837	13.4743	3.36495	6.50214	14.0984	4.02552	8.22012	6.4637	7.59712	8.53833	9.76135	13.5956	21.1228	5.58347	2.55327	28.771	9.8427	4.23574	62.2232	18.8558	6.0384	30.0462	12.4349	20.7035	62.8502	16.9771	7.66911	23.8635	15.2561	14.6304	27.1072	13.9962	10.9122	14.3652	13.1321	9.65117
Pita_unigene7298	1.6652	50.9006	46.5016	6.8928	112.063	56.3726	5.37152	29.2281	41.0526	6.82973	79.8773	37.7636	8.21703	30.7199	80.3781	94.8401	46.0833	6.96218	5.73308	13.8867	46.16	33.6982	4.26423	20.5069	11.266	3.29564	4.29902	59.9204	32.4619	33.0214	5.84755	5.19037	5.65772	27.8253	21.335	22.8618	2.73428	1.25108	1.30717	15.4621	6.97387	19.8884	0.608115	2.11485	4.34122	15.8463	13.3802	20.6906
Pita_unigene7249	6.68901	4.83485	4.56013	4.03525	6.60941	3.8342	4.10692	5.62468	4.31305	4.03734	5.01655	4.97087	3.498	4.09279	5.29458	5.60425	2.33761	5.35832	3.82852	4.75086	3.73974	4.13426	3.46047	2.75739	12.1482	11.9355	7.5559	12.0402	6.12334	9.93873	17.2235	23.4251	14.0042	12.9828	15.6989	12.727	4.77461	7.12054	4.78588	5.27681	4.62778	4.00647	2.51507	5.08854	3.64215	3.50895	3.01256	3.18934
Pita_unigene7225	1.70564	0.338638	5.6602	1.42921	3.1886	7.00175	0.63868	1.3419	0.604281	4.22643	3.98444	7.26812	3.2419	1.79349	2.42251	4.69694	9.17094	1.52642	1.57698	0.682673	0	1.54548	1.59633	1.77637	0.751891	1.12021	0.941348	0	2.07849	0.323498	0	1.05198	0	0.639452	0.650453	0.641331	0.949332	0.37987	0	1.15787	0.31627	0.639644	1.62966	0.6745	0	1.16036	1.67982	1.23994
Pita_unigene7179	1.85865	1.38752	4.27443	0.757893	3.61606	4.56181	1.37647	1.64428	2.47539	0.880336	4.16347	2.30218	0.504806	0.518092	4.64325	4.64449	2.60159	1.6076	0.184655	0.848608	0.802007	1.51201	1.83574	2.0213	2.35241	0.915796	1.3426	2.43244	4.74801	1.49554	3.35769	0.342243	1.37573	9.26875	3.05637	2.26591	6.81508	2.40673	7.08855	13.4781	8.05848	6.82061	1.71544	0.904626	2.29695	3.93227	6.51151	1.60273
Pita_unigene715	0.254022	0.508381	0.19086	0.294335	0.421335	0.566478	0.381335	0.381208	0.442259	0.225436	0.582478	0.273726	0.392912	0.214061	0.308087	0.183332	0.446924	0.336684	0.219316	0.141193	0.227678	0.169156	0.144021	0.600834	1.32535	0.210822	1.71691	0.526877	1.84779	1.81847	1.28101	0.712712	1.757	0.248589	2.69213	1.75347	2.89621	0.396027	2.2201	0.607221	3.0889	2.26707	1.26434	0.749325	2.23734	0.783477	2.35458	1.98176
Pita_unigene7095	9.14138	3.4855	5.00833	4.23686	3.44515	3.49205	6.05613	13.332	4.5422	8.25685	6.48775	4.16452	7.11465	6.69645	2.73312	5.24251	6.6901	6.20539	7.39315	26.7696	3.98975	9.71514	6.72127	6.92444	6.2466	11.3783	17.1312	17.739	7.39934	20.8704	14.2685	17.4703	23.5535	30.1046	12.4729	24.8291	44.5566	28.6522	48.3407	62.4988	44.1459	43.2812	7.47907	15.9672	25.1041	14.431	11.355	15.1451
Pita_unigene708	87.4485	82.8003	330.127	167.702	78.9551	154.233	174.069	211.953	86.1572	114.407	104.736	199.599	125.154	283.484	85.9164	86.7982	246.849	152.623	70.0781	150.341	123.16	72.3014	234.651	125.226	12.9954	31.852	52.5322	60.9758	68.9282	251.971	5.79752	10.747	22.5869	40.0816	28.4254	122.28	7.87371	17.7751	26.4511	9.60343	50.415	80.106	19.7551	44.4511	31.8673	137.479	80.6776	185.456
Pita_unigene7046	39.002	65.2549	67.5296	20.9428	36.115	70.3759	16.2768	22.681	17.9451	8.65861	13.2709	16.8339	13.8488	29.5847	42.9872	21.0733	14.567	32.4678	6.8947	57.4204	20.3534	11.1409	14.5881	8.06098	51.7364	34.245	69.7767	142.798	68.2692	125.604	34.0166	56.7591	56.0908	44.5682	66.4558	54.6449	87.9419	72.5804	104.157	45.7434	104.813	140.406	12.8318	10.9199	30.3672	5.50648	24.2815	23.8107
Pita_unigene7010	13.5593	18.7034	6.97094	23.3675	11.2998	15.7851	6.30932	1.93437	3.89927	7.8776	1.2992	5.72408	10.7938	1.59234	8.95759	2.64854	6.8281	6.98764	6.90329	2.17229	4.75969	2.99793	2.78543	4.14275	1.48647	4.57324	7.28623	2.88899	4.79292	9.31165	0.590329	1.63836	1.60518	2.20734	2.10433	2.15222	0.347063	0.414382	1.10606	0.624848	1.1314	3.37571	1.98666	0.956129	4.23692	3.62994	1.82671	2.59378
Pita_unigene6966	5.46481	1.85905	3.14827	2.11999	2.47388	1.36755	3.69246	3.93272	2.3798	3.9202	2.86598	2.84786	3.9136	2.42085	4.34117	4.01111	1.84921	5.73159	3.36633	3.04052	2.60642	3.1244	4.22725	1.36578	1.83308	1.30638	2.30895	0.696142	0.360286	1.09316	1.03378	1.13648	2.47127	0.739536	0.670913	0.374353	3.05852	2.0426	4.5192	2.55277	1.12907	1.06405	1.50351	1.13323	3.7399	1.13918	0.70627	0.707264
Pita_unigene6954	4.09045	3.96663	1.03522	4.67499	1.94335	0.801542	2.59598	0.708744	2.44906	3.00478	1.08663	1.25041	3.30357	1.33199	5.03415	1.31018	1.18279	2.27207	2.08472	1.00861	3.60703	2.04655	1.45909	0.53361	1.24486	0.763502	1.22055	0.403793	0.534972	1.4423	0.297177	0.527426	1.67745	0	0.391789	0.18932	0.387928	0.347115	1.02919	0.0871913	0.378879	0.879283	0.587078	0.399535	1.51885	0.269183	0.20417	0.472934
Pita_unigene6953	5.41333	42.5539	48.2133	57.8281	44.5675	32.8661	51.7572	29.498	44.6652	25.4834	41.2747	10.8446	56.4696	61.7107	43.5915	50.8544	68.7358	115.693	35.9578	11.7972	29.2974	30.143	89.0103	17.7261	52.3658	24.7357	30.1521	1.2283	15.517	2.55734	76.0551	22.6347	29.7024	1.11548	5.95746	11.426	30.4297	10.6281	31.4803	4.13732	0.719079	11.5524	116.58	26.7245	22.2968	92.8954	49.3073	24.0274
Pita_unigene6938	1.68396	0.888452	0.364543	0.360849	0.605217	1.02674	0.587582	0.929988	0.464065	0.612084	0.527144	0.759271	0.212832	0.904268	0.602725	0.929088	0.879515	0.926858	0.293677	0.511689	0.366788	0.998627	0.523182	0.584338	1.51609	1.59966	0.913319	0.889392	0.649722	2.90936	3.32991	2.10094	0.917899	0.644771	0.668941	1.71385	2.8913	2.17114	2.27525	3.12012	0.945168	2.0647	0.856994	0.624125	0.603342	0.865189	0.699151	0.556751
Pita_unigene6925	2.6548	1.69774	1.74488	1.77279	1.79806	3.25249	1.78371	1.50211	1.00935	0.898547	1.28188	2.1259	1.98202	2.05766	2.46209	3.8308	3.06054	3.51545	1.0544	0.560718	1.23246	1.63926	1.8047	1.23692	8.39493	11.4149	0.957765	17.1394	3.47214	14.4379	9.65198	10.5623	1.96879	17.088	3.27016	8.76998	4.85766	6.00923	3.91306	7.35713	0.527015	3.627	1.5423	4.1645	1.7832	2.91612	0.662909	1.18303
Pita_unigene6913	17.7806	15.7034	25.8576	17.1607	8.27798	23.9428	16.8219	23.5756	16.9434	15.5438	13.7141	27.6374	16.664	24.2061	15.2583	11.379	25.234	17.6734	17.197	25.4175	20.3374	16.0712	22.9901	31.7171	8.37207	1.38747	6.66965	8.92306	17.7818	18.0954	9.61834	1.99081	6.96285	3.65208	7.97504	11.6688	11.5436	1.98951	6.96223	5.2577	10.1282	12.921	14.9895	4.0893	14.3716	14.943	18.2115	22.3625
Pita_unigene6894	17.2972	18.7898	7.49385	12.8357	12.9087	10.7519	30.8109	10.4964	29.0711	22.1186	73.2347	30.9082	23.2855	5.32374	17.6463	44.7041	19.1545	29.8693	18.3907	5.30329	11.3474	15.8172	14.4007	15.1679	8.44983	2.95024	5.61271	6.35751	8.32661	8.94765	8.75528	4.04293	10.0121	5.76431	8.19998	7.70226	21.8201	11.0185	21.6119	10.152	22.296	18.599	10.8037	10.8767	17.9448	14.2872	18.2206	10.9941
Pita_unigene6869	3.5311	9.25718	8.84447	5.14097	2.42827	3.45092	7.52494	4.77322	8.23173	6.65694	9.70464	9.2085	7.70543	6.11123	10.7433	9.06279	6.95086	8.09115	5.85041	2.14394	7.8836	4.59082	5.71784	3.68482	3.68149	3.28956	5.4368	0.485505	2.52534	4.70041	3.34338	4.04161	7.11493	0.54456	3.13352	3.57374	4.94156	3.56172	4.94787	0.468028	1.75078	4.84202	9.06795	7.80388	6.06189	3.85125	6.00461	3.13355
Pita_unigene6867	3.82771	2.91114	0.0509265	7.70405	9.8177	3.12574	3.01656	0.109753	3.15628	5.84262	9.54985	2.36775	5.59754	0.0479802	3.61121	10.0038	1.65539	2.99865	5.18497	0.0547354	4.46561	7.66203	3.01874	3.18415	0.386455	0.453932	0.101681	5.38418	0.250269	0.211167	0.558909	0.280383	0	6.17622	0.0531509	0.263185	0.0525693	0.220644	0.111098	3.86137	0.0523465	0.267109	0.055536	0.249548	0	1.87428	0	0
Pita_unigene6859	0.11488	0.0969158	0.897319	0.201444	0.504824	0.295492	0.348158	0.605559	0.515558	0.489111	0.807193	0.0519015	0.0925009	0.14514	1.95089	0.954507	0.165014	0.394099	0.0902509	0.281398	0.0717236	0.0927476	0.150759	0	3.64668	0.83031	0.503782	2.96192	0.321202	0.620211	5.66763	2.37581	1.89856	2.52838	1.23896	1.06514	2.67924	2.29124	2.08778	1.09833	0.196371	0.755854	0.0975713	0.376204	0.0958443	0.064055	0.252288	0.0594802
Pita_unigene6803	1.95733	2.02579	1.76538	0.975516	0.000333284	0.88957	1.51314	1.28825	2.42627	1.1406	2.32158	1.88393	0.52781	1.62967	1.62497	1.59557	0.874266	2.40455	1.41492	1.36442	1.17394	0.962506	1.77142e-08	0.868468	0.616804	1.03202	0.57922	0.955107	0.221154	1.23395	0.000425539	0.504439	1.06402	0.73415	1.95583e-07	0.232689	0.694382	1.36731	1.37577	0.806083	0.506177	0.964802	0.429226	0.784286	0.687782	0.975431	0.88189	3.29362e-08
Pita_unigene6756	1.36583	4.00375	7.07063	4.57373	8.28652	2.14915	2.91163	2.39893	4.057	3.84372	2.10715	1.23495	1.37317	1.11581	5.08283	2.73093	0.655605	3.32398	1.04994	0.804133	1.70628	1.21049	1.5662	1.7662	3.50345	3.09468	3.55546	1.2401	1.83906	1.2805	1.63778	2.53469	2.71913	1.19776	0.974452	1.00564	1.04065	0.752463	1.61332	0.233167	0.361793	1.2794	1.68132	2.65228	2.46625	1.21499	1.68346	1.59962
Pita_unigene6742	182.907	38.0534	69.9046	82.6836	72.7603	64.6988	144.162	64.5695	109.765	91.1602	107.886	63.9223	99.9266	71.6662	82.5048	102.735	94.6613	214.743	34.2994	37.2117	57.3689	61.1153	104.94	46.7796	30.3845	71.2369	32.5386	1.38763	10.3573	8.20863	29.8718	72.5122	69.6072	0.517851	7.03733	17.2942	29.7515	104.421	52.9547	2.41112	2.38339	47.0938	50.6457	121.551	62.6185	41.3877	33.6675	97.8637
Pita_unigene6705	0.349408	2.91918	2.27409	0.111474	0.368702	1.3491	0.889257	0.426522	2.77133	0.305436	2.69438	2.36045	0.178967	0.558705	2.10203	1.64264	1.42704	0.781604	0.0498844	0.158089	1.00061	0.588863	0.257074	0.678547	0.625823	0.340481	0.989875	0.106894	0.0234616	0.050368	0.210179	0.138543	0.789427	0	0.0258277	0.172974	0.102478	0.122002	0.433804	0	0.0249233	0.129825	0.978011	2.42423	0.344853	1.53435	1.21464	0.376126
Pita_unigene6700	30.9309	33.215	37.9863	50.121	54.2667	39.0175	75.2173	123.365	104.707	78.4694	122.919	84.417	74.9353	159.607	104.957	101.242	87.2728	69.8851	100.049	144.308	81.467	124.786	101.372	135.565	91.0723	119.623	55.8257	468.754	151.339	169.169	280.949	495.802	220.404	687.494	610.255	766.694	119.093	230.903	127.673	341.22	240.645	246.125	50.4796	150.464	85.2989	134.381	154.244	156.047
Pita_unigene6691	6.00607	7.81767	8.74579	11.9956	9.56438	3.19248	8.5875	5.94284	9.48399	11.4834	6.37489	3.53822	10.288	7.23493	9.01814	8.75585	4.44285	11.7017	5.95784	5.18726	7.9596	6.59145	9.01596	1.98966	5.89221	3.90256	3.74004	2.57161	3.68027	2.54219	6.04604	3.31338	2.94859	1.79143	2.14336	2.05718	3.87141	3.62141	2.31164	1.43572	1.89882	1.60973	8.20183	3.4087	2.68198	4.55166	2.95834	1.88335
Pita_unigene6680	6.06493	5.64015	4.37985	3.38022	4.25053	3.64518	7.42619	3.82566	9.75079	6.7415	4.78615	5.62671	5.90985	3.86663	11.5635	8.20047	4.95351	7.11721	5.02119	4.1843	5.40691	8.36397	8.23144	4.10018	25.2136	10.3501	12.0807	108.293	31.664	29.4796	48.9036	27.7006	10.9226	75.0549	39.3102	30.4303	26.3311	7.67171	10.8119	38.7541	20.2109	15.9712	12.5238	7.89221	6.04143	7.60566	7.28472	5.12985
Pita_unigene6626	1.95317	2.38434	1.32077	0.702919	0.489584	1.73793	1.19573	0.580821	0.605236	0.759266	1.19484	0.383161	0.882518	2.32041	0.439778	1.26888	2.6117	1.4756	0.417759	1.60602	1.256	0.958837	1.31726	1.05916	1.19411	2.9736	0.890959	2.11347	4.01076	1.5468	2.00544	2.93654	1.17866	5.47187	3.86068	1.71552	1.82144	3.47608	1.87946	3.7963	1.84123	1.17474	1.42754	1.56183	1.4397	1.5156	1.51708	0.460356
Pita_unigene6625	6.8158	2.01788	1.60395	2.71044	2.18632	1.15945	4.79076	0.84396	2.43856	3.03499	0.897095	2.23784	1.85834	1.47818	1.45775	1.40761	0.837178	2.59224	0.861667	1.14357	1.22322	1.05801	4.18108	1.14541	1.62929	2.17209	1.85065	0.919522	0.807694	1.30953	0.926519	1.27802	0.930103	0.221976	0.44556	0.670123	0.515044	1.51758	0.936007	0.33032	0.143536	0.59406	1.33431	3.0191	1.26505	1.31634	0.491168	1.39781
Pita_unigene6528	6.39478	6.33481	4.40284	8.52172	3.19312	3.3384	8.03223	6.12848	8.31775	10.2517	4.75327	6.82045	10.3632	5.35454	5.10349	3.76782	7.35883	7.76259	10.3749	5.11673	8.17681	3.65104	7.205	8.11607	2.17802	3.66252	2.86074	1.77445	2.55674	3.9181	1.43019	1.95207	2.02209	0.994067	1.16674	4.53611	1.46338	2.55316	1.15287	2.43967	1.85488	4.0325	7.38845	5.72159	4.51493	10.0498	2.4737	5.66011
Pita_unigene6515	2.33883	2.90198	3.69025	3.32819	4.44383	2.75393	2.36332	5.57237	3.36335	3.82163	3.93377	2.64627	3.62094	5.5204	4.41212	4.15901	1.91515	2.8413	3.40486	9.41541	2.62531	4.06161	2.69838	2.31567	8.00948	5.3225	3.33619	30.0371	6.04513	4.14582	15.5401	11.5591	7.83014	33.1568	14.9638	8.17664	11.7838	8.11966	7.19449	15.7997	11.3762	4.21126	3.24976	2.9566	3.73345	5.34293	3.38614	2.78225
Pita_unigene6503	0.293115	0	0.386953	0	0.417735	0.160195	0.56166	0.730125	0.406652	0.187146	0.380777	0.202004	0.116085	0.110415	0.192183	0.389757	0.0889982	0.0922481	0.113252	0	0.321854	0	0.189441	0	0.744278	0.49336	0	0	0.213056	0	0	0.135396	0.309588	0	0	0.0747478	0	0.738706	0	0.104193	0.0572837	0.114545	0.408992	0.191222	0.280931	0	0.776531	0.184988
Pita_unigene650	0.95628	0.564302	2.63906	0.607802	1.81474	0.562689	0.361161	0.613441	0.224236	0.382391	0.609973	0.215796	0.198436	0.436541	0.413347	0.861356	0.184108	0.679033	0.164103	0.727078	0.0412808	0.154403	1.20089	0.529846	0.588059	0.039364	1.36299	0.984598	0.620666	0	0.547576	0.39619	2.2849	2.81069	0.824601	0.439654	5.23601	2.83167	10.7186	4.0074	2.56826	4.56139	0.124046	0.817122	6.56536	1.02059	4.81118	0.408697
Pita_unigene6480	0.364794	0.974114	2.29303	0.700053	2.28339	0.323971	0.283476	0.108132	1.06749	0.555237	1.24872	0.160756	0.201302	0.15072	0.926302	1.13533	0.19041	0.287805	0.597277	0.632669	0.572889	0.711137	0.140863	0.105636	0.800186	2.72768	0.348739	0.698973	1.47866	1.95814	0.623495	1.22193	0.0726138	0.484071	0.563008	1.22229	1.41176	3.34241	1.4383	0.378581	1.01536	1.24022	1.0533	1.49499	0.901116	0.869459	1.49093	1.11489
Pita_unigene6432	2.44708	6.98884	11.1205	8.11383	15.801	6.12747	10.8968	8.32058	8.39945	9.57425	6.51121	6.84818	6.82633	9.57854	9.28691	7.08342	8.86058	13.8984	3.54137	4.54367	5.67059	2.63767	5.51062	2.92437	4.56385	7.71918	5.74979	11.4197	11.8673	5.76411	7.06971	9.30967	5.87091	6.66896	6.43285	9.38664	3.03473	3.79954	5.22868	2.60658	2.83295	4.4985	2.6325	6.89777	3.18452	4.6493	6.54102	3.79948
Pita_unigene64290	1.18758	2.44381	5.01563	5.21787	4.15594	3.4272	3.63249	3.09876	3.35198	6.57194	2.94785	3.98312	4.8572	3.84234	4.27524	4.27793	4.64079	3.10418	5.2101	2.13542	1.81336	1.77847	1.83611	2.54259	1.88253	4.0828	2.7205	1.46534	1.46634	1.4173	0.546742	3.20839	2.85235	1.22539	1.10572	1.27209	0.714975	3.40417	2.98207	1.00934	0.747704	1.50531	2.6377	5.35976	2.27953	8.68654	3.94107	2.6707
Pita_unigene64283	18.6222	34.9669	66.9429	34.5038	60.0175	68.6429	12.0352	26.258	26.2911	20.6996	12.2387	35.1374	26.9968	34.782	31.0382	47.4318	39.8855	31.0119	10.1531	23.0618	28.544	23.4999	10.195	26.3369	14.7542	28.8044	40.5866	6.77513	46.1875	10.5129	1.73886	18.9891	16.7969	1.80272	10.2363	8.76454	10.2554	26.4125	20.3863	4.79599	6.76254	9.67108	16.9857	24.6891	24.6735	21.9157	14.2733	13.3646
Pita_unigene64213	3.77437	0.956553	1.4616	1.51074	3.21712	2.24751	3.37857	2.3311	3.11895	4.45244	3.73452	2.53531	2.64519	2.38059	1.2793	2.51288	2.47916	3.28848	3.25639	1.2989	0.893417	1.57117	1.96244	1.21043	2.4958	3.07826	1.46288	4.40837	4.76807	8.71985	4.07461	5.05175	2.48618	6.92726	6.07501	10.8118	5.48887	5.52162	3.73982	8.19648	13.8449	12.0148	1.07785	3.05223	1.24206	1.2976	5.35039	6.26572
Pita_unigene64203	1.18386	0.729664	0	0.233993	0.501151	0	2.07382	0	1.00136	1.17477	1.90342	0	1.07196	0	0.910555	1.50009	0.0471351	0.999483	1.25482	0	1.15307	1.49028	2.25961	0	0.437154	1.49367	1.55544	1.73251	1.96734	2.48612	0.384337	1.56944	0.737401	1.5652	2.38043	2.59819	0.5899	1.72526	1.30667	1.2988	2.03778	1.73496	0.323784	0.986848	0.83566	1.49864	0.903607	1.20549
Pita_unigene6420	0	0.199137	0.564287	0	0.200116	0.34926	0.474672	0.140829	0.0887903	0.845308	1.22297	0.179756	0.190226	0.137181	0.244177	0.991104	0.619896	0.401692	0	0.561154	0.278768	0.570798	1.33319	0.123709	0.127291	0.320197	0	1.36184	0.564258	1.98095	0.167108	1.05723	0.65667	8.6592	5.51805	6.65856	0.82791	1.72031	2.32774	5.47396	5.27912	3.02652	0	0.0977526	0.285422	0	1.41195	0.146075
Pita_unigene64186	72.8031	58.3168	82.4665	80.2904	65.0939	88.6846	138.491	85.802	88.9204	95.5385	98.4278	123.537	99.4758	57.7047	62.9114	102.743	111.314	128.097	89.017	32.1459	85.1982	53.0831	84.2197	92.8176	21.6594	104.305	43.0811	0.914575	2.13182	4.61814	3.86898	53.6732	16.8741	0.268843	0.230753	2.8382	5.91121	40.6963	13.9306	0.375994	0.519768	6.17742	143.356	195.401	44.015	63.7865	16.4706	53.7904
Pita_unigene64160	23.1083	20.3402	10.8915	11.6738	3.38384	5.96734	17.2369	13.5954	22.4383	17.423	16.9425	10.9923	25.314	17.9119	24.0197	16.1019	17.3648	17.5113	11.8244	6.37663	16.8556	6.52311	17.2839	6.20155	15.6123	9.79989	36.0086	7.97889	7.40698	31.2687	15.2686	7.39469	37.2705	14.2738	4.30837	16.1294	26.2753	11.5406	77.6731	32.8792	6.20601	43.4532	30.1659	12.241	42.393	75.2546	33.1793	18.8452
Pita_unigene64143	2.18572	1.9824	3.47911	1.04602	4.64173	5.28568	2.2514	4.75243	1.81823	0.875726	2.62013	2.87783	1.25278	6.18925	2.36771	2.43075	2.04354	4.3627	0.468068	12.1704	1.0171	2.34675	2.27799	1.71699	10.5748	2.81069	5.28892	26.3519	7.9985	2.02186	16.3502	9.01328	14.2367	25.024	19.1176	11.1307	16.9331	7.69508	8.16894	27.2494	12.5244	5.60266	1.4758	1.19592	3.81683	2.224	1.35066	2.87533
Pita_unigene64127	141.409	87.1403	55.6908	58.2534	39.8688	44.7347	85.4552	95.395	96.3393	64.7999	62.725	82.1174	54.0763	88.1215	78.6477	52.4496	55.0457	73.4595	47.736	60.9677	54.5522	46.6952	48.2351	45.7258	146.295	204.869	91.1108	157.37	85.1443	298.18	228.13	274.668	140.315	264.724	198.916	235.826	191.034	219.324	166.954	286.225	202.597	240.617	69.6372	84.0198	49.8099	133.248	56.7015	39.2177
Pita_unigene64119	2.46988	3.54141	5.47253	3.06623	5.40568	2.28202	3.42875	2.74586	3.85745	2.6227	2.95874	1.71918	1.63718	3.14507	5.54712	5.97552	2.10706	3.85423	1.56242	2.01939	4.00386	2.39012	1.71671	1.75892	3.77466	1.85936	1.06771	1.0779	0.947143	0.491147	2.84952	2.16058	1.09994	0.718006	1.00642	0.895367	7.27157	4.11755	1.77362	1.34164	2.4287	2.49049	3.9055	3.23333	1.25635	2.56421	2.89125	1.91783
Pita_unigene64101	1.65124	4.94585	1.89911	8.43166	2.83207	1.83254	1.92481	1.33269	3.35422	6.83113	1.02076	1.86635	6.81079	1.31682	4.58507	2.42523	2.31369	1.60811	3.64027	0.383493	5.46486	1.87189	1.5017	0.924317	2.5484	2.03867	3.29772	0.287015	1.46835	1.72996	0.900639	0.62859	1.75556	1.01711	0.519424	0.801104	0.500733	1.25705	0.984246	0.210157	0.837068	0.997796	1.61445	1.22893	2.16497	1.25667	1.53138	1.51658
Pita_unigene64092	0.200075	1.15587	1.39853	0.70558	1.4559	0.511552	0.0377895	0.27772	0.21333	0.151592	0.887444	0.367629	0.342494	0.381397	0.862615	0.828251	0.33604	0.262139	0.334114	0.471214	0.521145	0.146021	0.15294	0.104483	0.399149	0.55011	1.32569	0.317869	0.244447	0.0750339	0.0781013	0.288787	0.435686	0.268637	0.115288	0	0.15243	0.136155	0.16139	0.27324	0	0.308635	0.459736	0.660548	0.948379	0.569405	0.642261	0.298193
Pita_unigene64087	0.100932	0.536284	0.495084	0.348909	2.27884	0.430281	0.063576	0.200179	0.478395	0.382352	0.518974	0.103052	0.287997	0.524634	1.75344	0.132651	0.226419	0.283701	0.0624347	0.0659986	0.093916	0.399138	0.289467	0.146429	0.969699	1.27976	0.309692	0.802292	1.14522	0.220741	1.80726	1.63023	0.36616	0.548908	3.10274	0.371401	0.352599	1.7176	0.542895	0.114883	1.21659	0.129874	0.289927	0.457102	0.830383	0.149823	0.607831	0.250904
Pita_unigene64007	0.139357	0.24295	0.0961262	0.0937235	0.228068	0.0685433	0.0329142	0	0.185764	0.00646633	0.339026	0.0355695	0.0758721	0	0.324959	0.0811261	0	0	0	0	0	0.12473	0	0	0.0772389	0	0.0443532	0.0692242	0.737964	0.0979689	0.51032	0.0718361	0.151679	0.47518	0.752002	0.256422	1.19302	0.27752	0.203544	0.268285	0.281125	0.605082	0.0333579	0	0.343969	0	1.19975	0.0324725
Pita_unigene64006	0	0	0.21757	0.101077	0	0.101948	0	0.257084	0.0921538	0	0.150107	0.0529358	0	0	0	0	0	0	0	0	0.0482361	0	0	0	0.260647	0.0549443	0	3.3589	0.226304	0.048663	0.556051	0.277084	0.597156	5.32315	2.69393	0.0477966	0.197446	0.0588081	0.309391	1.45897	0.54248	0	0	0	0	0	0.155959	0
Pita_unigene63988	1.09528	1.20441	0.513097	0.396956	1.22205	0.0814509	0.547721	0.0575961	0.663038	0.410982	0.336158	0	0.220853	0.0503884	1.31511	0.43153	0	0.928846	0.484732	0	0.380738	0.158804	1.15295	0	0.257324	0	0.343306	0	0	0	0	0	0	0	0	0	0.0653385	0	0.117044	0	0	0	0	0	0.229581	0	0	0
Pita_unigene63975	9.62593	7.94723	13.3003	7.75849	12.6263	7.64304	9.47105	4.43579	7.06116	6.85252	14.2636	4.82682	4.09752	5.85769	7.08704	14.6494	5.40076	10.4161	3.30197	1.67654	3.23507	4.88413	4.98953	1.52238	3.63561	8.18502	16.1828	0.725629	7.32637	14.3055	1.75402	1.6794	8.11354	0.600569	0.936188	4.69428	2.84267	4.60272	11.9783	0.624187	1.23361	12.2402	3.58643	6.91994	4.777	1.3558	4.32939	7.10679
Pita_unigene63974	0.840043	0.156836	0.482929	0.490277	0.155413	0.154769	0.495372	0.520392	0.186538	0.198919	0.202572	0	0.0998409	0.136533	0.0471233	0.0517445	0.087887	0.245128	0.048697	0.103147	0	0	0.751799	0	1.04703	1.77967	0.338059	0.937244	1.46588	1.23136	0.511588	2.2195	0.743789	0.502864	3.17481	1.45136	0.149873	0.178558	0.423336	0.448033	0.145996	0.353664	0.0502602	0	0.155628	0.0465641	0.841821	0.0976703
Pita_unigene63973	8.27619	4.05789	5.34657	0.967795	5.00737	2.57706	2.85392	5.85254	6.29358	19.2565	8.55394	4.07671	5.57934	5.41659	7.16701	6.32778	6.84658	2.35398	2.8507	12.0848	6.35927	11.8106	9.05123	5.69729	9.19772	5.88654	7.01002	9.55376	4.42258	18.1634	30.3423	10.5018	5.14138	36.8374	23.1778	32.5008	29.7456	13.196	24.9202	37.9433	28.1338	21.6814	6.04757	3.18056	8.07841	7.60203	18.0595	5.98359
Pita_unigene63931	10.8372	3.14469	7.23687	2.15841	2.38903	5.22425	4.55654	12.5515	3.56242	4.22335	3.83492	17.3109	3.32447	7.58269	4.04398	5.10229	8.63002	4.7104	1.50485	5.88836	1.54875	3.64669	6.63492	9.10987	5.76988	7.15545	5.17889	19.7005	5.16841	44.6501	17.2016	11.9891	7.45847	35.8259	8.01638	52.1671	15.529	12.9037	23.3253	33.8669	9.03194	109.424	3.82278	4.37135	6.12023	15.5366	6.04272	8.84479
Pita_unigene63922	2.55849	0.960445	0.299034	0.787506	0.324521	0.310448	4.70072	1.63229	2.74846	6.81145	0.490366	2.26318	6.42509	0.528528	2.05325	4.22232	1.01442	2.10957	6.49654	0.248661	1.31063	2.15917	1.36405	0.756492	0.0700323	0.939061	0.241891	0.324867	0.233983	0.356096	0.628374	1.05568	0.206871	0.618311	0	0.249433	0.327846	0.168098	0.290199	0.22356	0	0.455734	0.444222	1.42761	0.542539	1.06137	0.542371	0.935894
Pita_unigene63916	3.65269	5.53685	4.45349	0.519672	3.72648	5.35768	3.938	2.78463	6.45547	0.817139	4.27293	6.11755	0.550019	3.18328	6.41265	4.01041	8.41807	5.66253	0.375251	1.2486	3.29969	3.32197	2.63306	3.25754	1.3491	0.911601	2.04698	0.826515	0.437557	3.62279	1.766	0.942575	0.867104	1.22634	0.0880262	1.32005	2.95043	1.44354	2.6637	1.28334	0.46935	4.42886	2.71146	1.41255	2.35946	2.77131	0.716512	3.1497
Pita_unigene63909	11.2097	22.7094	20.9735	26.2447	6.98933	15.526	34.0316	24.5752	29.1559	31.2959	39.7319	22.861	33.4559	27.0872	27.4461	27.5183	56.0737	22.0626	21.0883	11.8373	24.3563	19.2342	22.1009	17.9588	13.3734	19.0967	18.2645	6.21195	12.6954	11.7363	17.2612	19.3626	21.9074	4.21105	9.5393	16.9103	6.27789	9.93643	13.1936	6.11195	6.00738	13.7038	36.9403	28.6202	15.7529	38.0174	33.6209	20.0512
Pita_unigene63907	71.1759	59.1678	46.4887	37.7684	43.1734	54.0124	24.4605	30.2426	29.0892	17.8219	14.077	31.3092	23.7526	29.5773	27.4715	25.1586	14.1996	23.208	21.5274	33.2524	32.8879	31.9821	21.4838	25.9245	175.765	117.243	107.503	298.432	130.227	172.605	153.333	178.695	106.591	154.575	205.816	137.499	23.9436	16.0294	16.2496	39.9719	29.5699	20.3725	39.9088	23.5617	29.1263	30.1913	27.3787	35.794
Pita_unigene63901	1.05133	2.30523	1.37557	0.918665	3.45642	2.14014	1.79095	2.29192	3.95193	2.65666	7.59537	4.48851	2.85422	3.1851	2.61753	8.10225	5.5017	1.86536	1.91162	1.34505	2.90367	5.18281	1.51969	3.14292	0.951153	0.679771	1.82584	0.384794	1.00012	1.81106	0.912629	0.883811	3.23085	0.45547	0.953054	2.58581	1.24097	1.18147	4.5368	0.627488	1.81447	4.14884	1.57628	0.89035	4.15516	0.969102	4.09309	4.11449
Pita_unigene63891	0.660157	0.204696	0.503941	0.145456	0.345443	1.33961	0.686045	0.672621	0	0.808512	0.67037	2.00545	0.555852	0.250732	0	0.755363	1.61102	1.21434	0.350437	0.391944	0	0.785539	0.453822	1.85103	2.52433	2.85886	0.705755	1.9026	1.15346	2.22416	1.39453	4.20789	1.00043	1.14948	1.7489	1.12683	2.00919	3.55795	0.567061	2.59543	1.16828	1.50479	2.07055	2.50629	0.656314	2.11776	1.36227	1.41219
Pita_unigene63882	63.4714	44.4456	34.9405	35.0277	40.5342	47.4035	76.7336	90.0628	64.4087	56.6382	36.0897	57.4928	41.1687	80.7641	80.456	44.965	44.3951	76.8292	86.1563	156.921	81.9989	76.3389	87.9317	70.7707	118.755	70.6159	63.2534	209.87	93.0919	107.236	161.184	158.446	136.42	299.844	221.451	183.499	210.027	149.735	125.805	376.855	201.037	189.844	80.6653	87.1698	107.863	87.104	100.485	143.996
Pita_unigene63875	27.4377	5.44989	6.87476	7.44849	15.7333	17.6532	10.1075	17.1678	11.2155	17.3965	43.9615	15.0304	14.3089	12.464	11.4393	21.3886	26.8464	12.6074	4.28085	16.2893	6.86171	27.6894	13.9576	11.421	55.2699	57.0346	20.9212	39.6614	32.8389	98.403	91.8061	45.008	19.8674	84.5245	85.2621	55.7987	58.1841	21.3762	49.9346	28.3744	34.524	17.8896	6.50667	7.09587	10.9036	9.76688	26.2168	6.46672
Pita_unigene63833	0	0	0.995536	0.182358	0.228902	0	0.505406	0	0.326396	0.197968	0	0	0.220934	0	1.10175	0.567204	0	0.874005	0.129302	0.332371	0	0	0.714012	0.286504	0.959257	0.346678	0.320678	0.443843	1.52491	0	0.58939	0.624454	0.936223	0.995	2.01526	0.534856	0.47635	0.989467	1.47511	0.466394	0.893793	0.32958	0.222309	0.915326	0.44716	0	0.989372	0.20651
Pita_unigene63793	0	0	0.571696	0.362475	0.997242	0	0	0.330419	0	0.385117	0.319778	0	0.22071	0.310053	0	0.318439	0	0	0.469252	0.457593	0	0.523279	0	0	0.439436	0.667829	0.453273	0.399599	0.487263	0.484839	1.15323	0.592911	1.11095	0.59237	0.887497	0.740008	0.486831	0.256742	1.11285	0.208432	0.282567	0.481602	0.0850702	0.424798	0.362616	0.235142	0.137685	0.245527
Pita_unigene63779	73.7638	68.2863	20.2505	50.1288	71.179	47.2514	62.4057	41.0793	62.8171	50.5353	59.2671	65.9602	47.9479	30.6446	64.0364	80.5826	54.1011	60.3377	50.5537	28.0161	63.8767	45.0582	29.5157	60.3814	44.3968	38.7154	30.8281	34.5642	19.298	25.8394	23.0718	29.6791	28.0385	24.477	12.6445	18.921	15.3788	31.9331	22.8797	35.9179	18.1921	22.0824	73.3771	67.6999	37.8149	86.3417	58.8959	36.7052
Pita_unigene63770	0.55152	0	0.243924	0.433619	1.16855	0.477067	0.356379	0.166504	0	0.575586	0	0.643195	0.540137	0.565497	0.520088	0.484922	0.122357	0.191006	0.713408	0.179909	0.500062	0.495374	0.271881	0.170799	0.430951	0.653666	0.612742	0.461469	0.923029	0.859993	1.07628	0.194145	0.459373	0.33453	0.256232	0.451983	0	0	0	0	0.325984	0	0.32597	0.215331	0.859258	0.591045	0.522184	0.633217
Pita_unigene63663	1.29808	1.98488	1.48564	1.64513	0.848399	0.823225	1.25416	0.572175	1.48708	1.01076	2.00208	2.003	1.04266	0.449749	2.9433	1.96197	1.50645	2.00172	0.562129	0.339391	1.10067	0.783828	0.74483	0.853782	0.986573	0.852871	0.451478	0.198185	0.428047	0.135156	0.535608	0.416339	0.847365	0.138491	0.332604	0.212201	1.09969	1.34201	0.960192	0.714188	0.508213	0.668604	1.04962	1.03531	0.293963	0.925883	1.15857	0.295961
Pita_unigene63617	0.547045	0.310422	1.57017	0.758889	0.390901	0.829962	0.710529	0.650034	0.565884	1.22613	0.239825	0.896029	0.612669	0.66303	0.618222	0.399727	0.530583	0.422577	0.388549	0.305062	0.209954	0	0.107836	0.23418	0.238669	0.229404	0.118873	0	0.0815429	1.12473	0.367165	0.158046	0.36067	0.144325	0	0.286123	0.256801	0.0610955	0.227565	0.0642108	0.0997743	0.43531	0.15454	0	0.27756	0.15787	0.85966	0.251614
Pita_unigene63607	107.018	156.652	84.3402	89.5585	110.684	68.0634	105.802	62.1618	128.262	84.4118	94.4436	73.9987	103.723	39.3752	173.915	123.341	61.2782	105.807	81.2191	28.0079	171.025	67.7687	58.6353	46.2446	98.434	34.2249	67.7625	22.1761	43.3236	50.308	62.1671	31.9022	47.4546	11.3984	35.5345	29.5042	64.4282	27.1714	51.5259	21.7092	28.7582	43.7746	98.8338	42.1637	53.4785	29.0937	33.9157	51.462
Pita_unigene63595	19.4592	9.40575	24.673	5.25855	8.42858	11.5789	35.8455	20.7589	23.0134	16.6094	27.3384	25.8302	3.73071	11.4603	9.43477	11.9373	13.9349	16.962	5.46829	6.94002	10.8648	9.08794	21.4395	25.1777	1.19702	13.5832	12.3707	1.06259	3.67798	13.2666	0.827037	3.23473	7.89712	1.29715	1.69608	7.14702	1.6976	18.2174	16.7591	3.64784	4.94989	15.4569	3.18511	50.4054	22.7507	25.3062	23.4259	17.2043
Pita_unigene63539	1.58632	1.58023	1.69649	0.95654	1.23237	1.45142	0.801495	0.658442	1.24573	0.663835	2.95227	1.01688	0.280689	0.799066	1.19314	1.09088	1.05423	0.898156	0.51342	0.398129	0.480517	0.572234	0.740429	0.610101	1.10407	1.98883	2.17306	1.75888	2.18939	0.968329	3.06137	3.27094	2.20874	4.31792	3.75604	4.03968	1.22991	2.17606	4.27819	1.03919	0.957699	1.63689	0.635794	1.11018	0.546392	1.8058	2.25806	0.515654
Pita_unigene63520	4.65934	4.45608	4.42485	1.4784	8.24178	5.48827	2.32534	10.9102	4.54368	2.71959	3.22733	3.06005	4.57602	11.0817	7.90335	6.89931	4.07504	3.53685	2.1197	38.7423	7.92114	10.9548	6.47415	5.84239	10.7592	5.35524	11.2086	33.1548	14.4736	25.7641	16.6362	11.2167	17.6118	44.2766	17.1466	22.1543	66.3714	13.9299	41.7987	57.6972	46.2819	32.1672	7.68577	2.65415	20.528	8.30197	7.2579	11.296
Pita_unigene63497	0.684291	16.5487	16.118	0.201721	0	0	1.52786	20.1428	23.1395	1.04891	0	0	2.04493	19.36	20.2191	0	0	1.62907	0	17.9306	21.3141	0	1.87275	0.181126	18.333	17.2439	23.0924	13.4641	30.0412	30.1925	25.8666	21.4104	24.7794	14.6694	41.0622	27.5633	27.8899	26.2467	39.5354	17.2569	55.9872	32.5334	22.4564	16.2007	18.1722	11.9679	38.1753	17.7548
Pita_unigene63495	3.94906	12.2858	28.4814	15.6382	11.9453	12.2936	5.82228	19.5376	14.1131	18.6357	9.8468	12.7291	8.84551	14.5539	11.558	10.6664	9.38286	6.12029	12.8106	9.60325	11.0765	6.3174	5.28214	9.24798	3.85786	6.15763	7.96332	1.87811	2.32475	4.94034	1.87639	3.4256	3.79789	0.805137	0.679235	2.80046	3.47501	11.0652	13.8049	3.11951	2.04148	10.7211	5.63197	6.68318	8.00847	7.03587	4.95863	14.6042
Pita_unigene63464	6.94009	2.97947	8.30398	2.5745	5.37608	4.21768	17.9798	8.7195	6.80734	5.68453	11.4199	10.7005	4.54126	8.18901	4.38018	13.3324	7.53947	19.0955	3.56034	5.46616	2.67894	7.84905	11.6302	5.67247	6.51185	3.51415	2.80621	1.10036	2.05812	2.80101	8.37147	3.29987	4.58732	1.36877	3.05431	4.31298	3.78012	3.66362	2.77292	1.14015	1.40328	3.10444	10.48	4.39813	3.15157	3.89333	2.97698	6.80547
Pita_unigene63451	2.4453	4.38485	2.02408	9.23829	4.93974	10.3434	5.61041	1.0392	5.58789	9.92503	5.38871	11.8051	10.6983	0.90792	4.36281	3.71872	9.6354	7.9842	4.37565	0.788136	5.13546	1.88074	2.57116	4.22655	2.55573	6.79268	3.21539	1.04114	16.6947	1.24428	0.784585	5.22212	3.68812	0.972105	8.75817	0.674923	2.29627	3.88363	1.62054	0.238561	1.55466	0.572995	2.37478	6.06897	1.68999	1.39965	10.1668	3.02803
Pita_unigene63426	2.44908	2.36349	3.80157	2.99286	5.70623	2.40958	1.57893	3.13493	2.9082	2.29085	3.37538	2.2211	1.63002	2.58923	2.52386	3.68589	2.71265	2.38541	2.29999	1.69774	2.44249	3.21294	1.70493	2.05974	1.5203	1.73078	1.34256	0.686811	1.0073	0.717723	0.695071	1.36537	1.46498	0.494772	0.788234	0.659563	1.0123	1.53837	2.17117	0.475698	0.343063	1.12523	1.41829	3.06475	3.27384	2.30781	2.57664	1.80401
Pita_unigene63386	0.465936	0.824814	1.28572	0.537147	0.459648	0.508728	0.976983	0.56446	1.51751	0.784579	0.599232	1.2151	0.443025	0.807756	0.975836	0.45921	0.65009	0.87027	0.576226	0.305109	1.25165	0.236015	0.197695	0.315359	0.401511	1.26118	0.523843	0.102694	0	0.388527	0.1009	0.320275	0.507726	0.148768	0.198772	0.0954019	0	0.880368	0.156541	0.220896	0.143962	0.0996491	0.644278	1.05685	0.358057	0.780681	0.207534	0.240792
Pita_unigene63359	4.74779	1.80058	1.18318	0.889378	1.44212	1.08504	1.36053	1.97453	1.87847	2.52372	2.89379	2.53341	1.5733	1.24707	1.62421	1.57005	1.16048	0.861438	1.42116	1.92234	0.256542	2.20862	2.92891	2.23978	1.29044	2.07052	1.38174	2.34418	0.614932	6.08567	4.66867	2.99998	1.73314	3.02885	1.41262	4.73267	4.23249	3.89251	8.46525	5.83144	2.32897	6.09226	1.11454	1.81277	2.26774	2.56613	3.47495	1.88524
Pita_unigene63329	0.290374	0	0.26816	0.482124	0.746067	0.855671	0.492949	0.460431	0.103151	0.331053	0.504237	0.711037	0.33128	0.15105	0.364748	0.228935	1.31044	0.70427	0.107718	0.228289	0.48591	0.317608	0.387911	1.11171	0.192993	5.6744	1.12158	0.805887	0.455988	0.435968	1.35719	10.1798	1.26622	1.00063	1.05884	0.481852	0.497146	4.73916	0.994876	0	0.107651	0.167515	0.555907	4.34954	0.918324	0.102884	1.27975	0.593811
Pita_unigene63265	1.14286	1.72853	4.08783	0.965949	1.91588	2.2058	3.35726	1.93041	3.79841	1.9243	4.24504	2.76521	0.442786	2.38417	3.68744	3.21244	3.44588	4.19728	0.863899	1.03864	0.669347	0.888063	2.46673	1.65779	1.07894	1.20896	2.14226	0.168084	0.66489	0.317521	0.991115	1.48379	1.7516	0.324683	0.406466	1.05215	1.20913	2.54423	2.43257	0.758687	0.313928	3.34522	1.41838	1.56221	2.38285	1.1664	1.99533	1.65557
Pita_unigene63227	4.5434	3.88028	3.8151	3.59916	5.39393	2.80495	4.32703	3.16264	3.13537	2.43193	4.95083	3.37157	3.30168	2.34668	5.2761	5.45215	2.80533	4.47273	1.78073	1.90903	2.88896	2.16381	3.0767	1.76877	3.84844	3.66488	2.18244	0.691888	1.47797	1.50728	1.65479	2.44378	1.93417	0.785859	0.86771	0.674643	3.17378	5.89205	3.74473	1.56603	1.91023	2.28952	4.06893	3.78162	2.78536	2.37129	3.88215	2.36909
Pita_unigene63211	0.930478	1.83575	1.02804	0.642922	1.97443	0.463088	0.943024	0.881641	3.4981	0.568232	4.09683	1.00134	0.736368	0.3557	1.9789	2.89275	0.487659	0.488277	1.15601	0.331141	1.97697	2.12504	0.837461	0.609256	0.517112	0.283885	0.220754	0.434866	0.71667	0.600439	0.515407	0.728996	0.199053	0.468542	0.914458	0.318393	0.616241	0.330132	0.413471	0.710322	0.735074	0.765365	0.655772	0.731112	0.434222	2.02768	1.6038	0.358458
Pita_unigene63165	5.02372	3.83659	2.83996	2.97103	0.98906	2.044	3.36957	3.16663	3.85935	5.46746	0.706464	2.30107	3.06638	3.37583	3.24774	1.08142	1.4386	4.47117	2.56519	3.54933	2.36316	0.558826	2.93203	2.16688	6.5848	6.80032	2.99466	25.629	6.226	16.8675	8.20286	7.3027	4.99205	18.646	8.17564	11.7554	14.3519	8.53138	6.11065	27.0453	11.1129	13.3191	4.91416	5.002	4.52628	6.74387	8.36098	3.59489
Pita_unigene63120	1.99049	0.94376	2.42329	0.960484	3.90252	1.03134	0.721781	0.653053	2.32874	1.42832	1.6199	2.27741	0.72669	0.563765	2.72668	1.79888	1.02124	2.65966	0.249786	0.0596793	0.632719	0.174472	2.0462	0.346702	1.82535	0.581187	0.889322	0.890579	0.997357	4.30351	2.09613	1.41458	1.11735	1.10773	1.51621	2.35027	5.8573	4.34107	6.69687	13.5347	8.1372	21.9578	0.193261	0.827394	0.97833	1.32619	2.68389	0.960331
Pita_unigene63107	23.0174	6.0326	5.00647	8.13363	52.8502	55.3547	36.3314	8.50302	5.99808	6.21798	62.9581	78.2118	6.46657	5.79023	5.92124	53.8304	77.3663	33.5516	4.50176	6.10651	6.01258	70.2508	37.5063	88.6203	4.78581	7.42567	6.46892	4.84422	5.52955	4.75211	5.81215	6.55125	4.27875	5.9482	6.82257	4.21603	5.53502	7.8268	7.65689	4.60819	4.85713	4.98673	7.51924	6.62444	7.89702	6.32778	7.24155	4.44345
Pita_unigene63095	27.7623	8.89752	9.69564	7.7181	13.1749	7.34172	21.7201	28.6945	14.4882	13.3742	11.6557	18.3584	11.8249	22.1539	11.0939	15.229	16.4389	14.0351	10.9161	24.0141	9.80689	19.681	15.8292	18.4219	15.3882	22.5869	10.4428	19.2294	17.4203	45.6011	29.1529	24.6611	12.5391	46.3917	41.0588	41.1154	41.2242	37.9378	47.9301	45.4121	52.8809	62.974	10.4683	16.0064	10.0793	22.3027	12.8373	12.9946
Pita_unigene63047	0.15404	0.0767971	0	0.0798706	0.151387	0.845033	0.18183	0.267239	0.137026	0.072848	0.185628	0.320303	0.109881	0.133308	0	0	0.381168	0	0	0.150656	0.0618607	0	0.21753	0.240744	0.787945	0.967836	0.895949	0.735021	1.18464	1.09207	0.467203	1.40474	0.513503	0.148355	1.84566	0.561097	0	0	0.0776505	0.0657901	0.107092	0	0	0.400451	0.0758659	0.121713	0.11589	0
Pita_unigene63030	1.71963	4.19755	2.80638	0.748288	2.41026	1.52592	1.20353	3.40864	1.57657	1.68139	5.83276	1.64145	1.68771	3.12581	2.68809	4.48292	2.22681	1.55312	0.411584	2.83416	0.670476	1.66876	0.847081	1.15846	15.4246	23.3371	18.112	5.22478	7.45313	69.5871	12.8597	25.1666	13.1204	5.25825	8.73084	16.3098	3.32465	4.08708	3.29834	2.93474	1.18255	2.56113	2.17713	2.31954	3.06974	0.786641	1.00036	1.44422
Pita_unigene63025	2.30367	1.06514	0.0523216	0.300139	0	0.995225	0.714435	2.83741	2.84655	1.43896	2.31278	7.47608	0.569926	0.992737	1.5191	1.58434	7.11759	0.811053	6.19194	1.37071	1.58081	4.57042	3.97552	18.589	0.587703	0.306277	0.665391	4.47445	10.7851	3.60397	5.18148	0.736153	4.94965	24.0158	25.3713	11.1254	18.9524	2.04337	18.5381	14.6725	33.6597	18.1484	5.26722	0.51542	22.4505	19.9663	51.8859	13.3711
Pita_unigene62985	1325.88	3108.66	464.106	6959.85	8011.85	4186.49	2216.91	604.043	3086.78	5267.94	2686.15	2560.26	5546.76	782.382	4768.93	2790.99	1846.69	2378.94	4601.79	605.044	4793.93	2471.09	1770.59	2119.13	1652.91	845.711	619.761	1688.39	3460.2	1521.93	423.822	551.815	328.991	713.89	1320.97	1468.74	343.756	429.759	236.377	322.561	2368.24	907.801	1309.17	714.105	556.174	741.141	3172.19	2306.11
Pita_unigene6296	8.97572	10.6094	7.52155	7.03412	10.9834	13.6519	17.7821	57.1472	34.4181	24.1802	30.542	30.9084	28.6433	58.4163	33.2523	35.8594	50.3869	27.7767	26.9802	101.351	43.3822	59.2851	33.0482	60.3423	25.9093	21.9787	11.1604	69.3752	30.0792	21.6555	89.3574	65.9292	59.2881	127.043	114.781	113.458	111.161	88.0034	48.7511	155.984	151.116	90.8464	44.9159	39.3171	38.5276	70.4624	38.898	42.2511
Pita_unigene6295	0.23456	0.700784	1.46706	1.26535	1.15544	0.783912	2.21402	1.16261	1.08356	1.95503	1.85498	0.861821	2.67653	1.46367	0.926633	1.20214	0.825785	1.18392	1.13143	0.73698	0.261779	0.128349	1.61286	0.408262	2.44321	0.943455	1.72642	4.56193	3.64321	3.47582	4.11684	3.4825	3.67937	6.02443	5.35964	4.75263	3.39377	1.38302	2.17538	3.08283	2.87015	1.35545	1.2126	0.501405	0.834131	1.20807	1.12879	0.436634
Pita_unigene62948	1.96976	0.436047	1.13225	1.74026	0	0.85108	1.89516	1.26594	0.835316	2.48734	1.16383	3.67629	3.04257	0.548624	0	0.778187	4.35463	1.43469	1.30416	0.624366	0.169689	0.695508	1.91751	3.20678	0.323465	0.490136	0.772186	0.424677	0	0.376137	0.676659	0.827355	0.360473	0.255964	0.0680057	0.100694	0.625442	0.785107	5.29697	0.76403	0	0.598185	0.31433	0.460314	1.98091	1.105	0.183016	0
Pita_unigene62927	0.684093	2.4208	1.02105	0.443378	0.923134	1.00884	0.926014	2.07147	1.85865	1.90969	1.72701	1.08947	0.732002	2.51265	3.22963	0.969021	1.34504	1.79492	0.514876	1.55196	2.12904	0.894605	1.1406	1.37422	4.06404	2.39076	1.07338	4.36364	5.08574	2.23909	4.7485	5.05577	0.650103	5.01636	5.71419	4.90715	2.67966	3.38508	1.26355	1.63955	3.91963	1.76707	1.67379	1.32996	0.505363	2.08894	3.95604	0.873572
Pita_unigene62881	0.819862	1.18776	1.05238	1.44569	1.49176	1.29979	0.425815	0.186761	0.291385	0.660019	0.286591	0.359643	0.740705	0.238972	1.32547	0.591939	0.542151	0.630941	0.228183	0.281616	0.305066	0.18698	0.483943	0.178393	0.499759	0.390416	0.339511	0.447711	0.152012	0.488553	0.267977	0.21132	0.13391	0.0393108	0.0787338	0.264144	0.220724	0.464927	0.119028	0.0699786	0.0689926	0.389529	0.532955	0.218038	0.242901	0.328048	0.110507	0.45817
Pita_unigene62880	0.438321	0.233643	0.760064	0.323341	0.45875	0.0844375	0.232077	0.1797	0.308461	1.13016	0.544251	0.296958	0.614124	0.311503	0.391689	0.287226	0.351174	0.637878	0.676674	5.72765	0.200394	0.668526	0.281286	0.0832139	0.211005	0.269246	1.63871	0.0404825	0.12571	0.198062	0.105142	0.21414	0.163466	0	0.0618853	0.179479	0.687808	0.408723	0.362994	0.0885951	0.0398787	0.806668	0.534778	0.253996	0.135899	0.0761317	1.86388	0.291303
Pita_unigene62821	5.6074	12.6734	29.2417	26.3052	18.4079	19.1694	21.0305	16.7236	15.8099	19.8127	25.9125	11.2961	15.0686	18.0457	9.54275	14.0327	14.4207	26.0155	20.6245	7.13455	15.1908	17.2078	25.9341	10.481	11.0757	21.4242	30.0098	1.20938	18.7203	5.67115	6.4646	7.13892	20.399	1.12129	5.33627	7.68048	14.665	24.1594	29.2448	8.57217	5.06229	16.7606	19.5587	38.5249	19.9424	21.3807	43.013	22.823
Pita_unigene62810	27.2372	32.901	37.0883	22.629	36.5745	27.0622	18.4675	21.2651	30.3276	26.7666	52.8098	34.0111	13.8473	17.4869	23.3792	30.7638	15.5789	16.196	15.0087	14.7759	36.0842	30.3289	21.8493	21.1563	75.5166	69.4897	53.7756	87.0984	65.4544	37.6635	85.7215	91.3287	70.4886	103.201	99.7672	77.1618	55.6266	49.8655	56.6364	97.1087	38.5478	33.715	23.8692	18.7958	22.7295	35.7976	32.1094	19.3735
Pita_unigene62807	1.92154	2.32347	10.991	9.21936	3.2422	6.53862	4.69713	2.62055	1.82539	3.30766	3.87344	5.06387	6.31347	5.58771	2.15973	4.05328	4.50018	7.23552	5.66821	3.1783	1.45025	3.44969	3.81299	2.24641	0.321528	0.539626	0.945637	0.170478	0.298685	1.92029	0	0	0.185678	0	0.164522	0.156847	2.63939	0.493174	0.345307	0	0	3.56388	2.61296	2.3063	3.25092	0.920732	0.312833	2.56062
Pita_unigene62747	10.1941	12.5573	16.5944	22.4605	9.81236	13.4902	10.925	12.0471	7.00475	17.2728	27.1284	10.2755	20.0426	9.28244	7.96078	11.9103	11.4009	12.2389	13.6899	5.07881	11.4558	4.51797	6.19644	8.33504	11.1566	16.1373	8.57453	1.87712	6.45292	5.15876	5.4083	4.93586	7.15957	1.59429	4.28659	3.71484	5.0583	14.0783	12.745	2.25209	4.16738	5.1241	7.51564	11.7882	7.588	8.99437	17.6539	4.85836
Pita_unigene62738	0.252326	0.376981	0.309437	0.348979	0.372393	0.289452	0.277966	0.250164	0.186825	0.15932	0.0405532	0.214635	0.239958	0.145767	0.377694	0.20725	0.176486	0.511454	0.273099	0.0412758	0.117357	0.19181	0.241064	0.47582	0.559287	0.444849	0.386984	1.33601	1.57808	0.906954	0.69752	0.56366	0.412159	0.604858	1.13075	0.387153	1.20132	0.572331	0.678413	0.789675	1.36455	1.01333	0.362366	0.571813	0.2492	0.448614	0.67488	0.274151
Pita_unigene62707	0	0.0425748	2.16238	0.133022	2.7437	0.336228	0.161442	0.550927	1.58237	0.364367	0.675469	0.436321	0	0.037042	3.53804	0.337052	0.968519	0.199923	0.396553	0.167828	0	0.0389916	3.63028	0.48364	0.287419	0.633089	1.18001	0.0848678	0.14921	0	0.208509	0.0440717	0	0	0	0	0	0.0484773	0.732652	0	0.0396279	0.0823906	0.245548	0	2.19532	0	1.32901	0
Pita_unigene62645	3.52116	1.2108	1.58075	1.26096	1.23726	1.85478	1.50411	0.581836	1.0056	0.476418	0.88929	0.984141	0.19932	0.544862	1.24238	0.371847	0.668509	1.37258	0.155554	0.287995	0.350936	0.573579	1.12135	0.401319	0.603943	0.487747	0.655755	0	0.219487	0.432359	0.0817978	0.0432185	0.0456474	0	0	0.07718	0.0798307	0.190163	1.01434	0.107336	0	0.363628	0.52173	1.22135	1.32477	0.670771	1.00907	0.780774
Pita_unigene62640	0	0	0.331532	0	0	0	0	0.0714876	0	0	0	0	0	0.0624608	0	0	0	0	0	0.0707259	0	0	0	0	0.199785	0.876298	0	1.61135	0.220224	1.14888	0.0703913	0.483127	0	0.17293	0.103874	0.862358	0.0686764	0.449803	0	0.400018	0.0334213	0.452072	0.069028	0.13996	0	0.192525	0.0723459	0.571091
Pita_unigene62623	0.71647	0.749424	0.527161	0.148613	0.668551	0.493328	0.169208	1.20776	0.254677	0.678544	0.449007	0.292587	0.27257	0.682803	1.70584	1.20055	0.0903541	0.536817	0.232666	0.175715	0.0333306	0.359571	0.547853	0.0311817	20.2915	0.719388	1.25296	50.6396	49.7123	4.86918	71.1809	11.3385	10.3333	75.6878	154.916	12.0638	93.6411	6.05505	8.77867	37.0017	106.617	14.7227	1.0976	0.139089	0.530554	0.60591	2.87594	0.300475
Pita_unigene62617	11.1369	4.63044	5.75019	6.57029	6.46767	5.3388	7.25259	6.78113	4.8681	4.7269	6.12269	4.5536	5.21982	4.50991	4.63624	5.23187	4.57484	8.74684	2.73816	4.96456	4.14789	4.90583	8.15868	1.78226	29.7588	7.35931	7.46477	55.847	13.4286	5.33142	67.6215	14.9479	13.3605	60.1442	23.3925	11.0343	18.0984	4.43466	9.39596	25.9171	8.71375	4.88415	5.35073	3.17081	5.69335	4.15719	9.13035	2.83008
Pita_unigene62591	0.588408	0.792899	1.03658	0.832842	1.57882	0.718034	0.334393	0.219229	0.648376	0.460438	0.681623	0.225725	0.55391	0.478487	2.32518	0.413945	0.61545	0.467256	0.255948	0.0216577	0.720065	0.121082	0.317199	0.211657	0.784277	0.116582	0.386702	0.0936253	0.501642	0.114831	0.113742	0.0683515	0.130627	0.0212368	0.148697	0.121865	0.337175	0.652208	0.646644	0.113226	0.29022	0.551726	0.507949	0.171401	0.459717	0.296024	0.911894	0.185675
Pita_unigene62557	5.74761	2.60772	3.49936	2.63046	3.06877	0.437032	1.26698	5.66255	4.9136	4.90952	12.1043	1.56314	3.51336	4.20744	5.1622	6.74747	1.29068	2.49282	2.70589	5.72566	2.44404	9.79297	5.64695	1.16093	4.05119	7.42677	3.02747	3.92126	7.96376	12.4413	16.905	11.8387	9.89299	9.79912	16.3231	20.3093	12.1751	8.82259	11.6961	6.59311	18.0466	12.8223	3.13144	5.21318	6.9907	1.85703	8.70294	6.04837
Pita_unigene62532	4.06841	4.02999	3.21167	4.34117	4.27986	2.63863	4.45824	8.45977	10.5316	9.39461	2.31528	1.00904	6.65534	7.6756	13.0341	4.33198	2.65971	5.5734	9.70632	8.54742	5.12726	3.43095	5.33494	3.24804	13.8166	4.69979	2.82472	11.8496	6.10986	10.2925	34.1652	8.49162	12.9463	11.0859	20.2702	30.966	4.916	3.90644	6.01332	6.75557	7.98932	7.49682	7.39102	2.92424	8.13724	7.43837	8.68744	10.7393
Pita_unigene62502	0.840212	1.10376	1.96556	0.822463	1.11978	1.46001	0.698062	0.549083	1.0517	0.808446	2.29139	0.870279	1.37884	0.331909	1.0522	1.27399	0.916677	1.01161	1.21687	0.198928	1.32304	0.587881	0.482687	1.27137	0.467223	0.468681	0.389458	0.129384	0.162134	0.147142	0.0618925	0.185577	0.39753	0	0.147641	0.124713	0.878692	1.64088	1.72146	1.12731	0.663252	1.06561	0.679544	0.833092	1.20657	0.902039	1.70072	0.716977
Pita_unigene6246	7.20556	10.0691	2.54604	4.96397	3.45415	4.07344	1.5784	5.37277	3.69011	4.0805	4.18924	6.77086	2.50932	3.60583	3.13093	2.75559	5.50525	0.80542	2.81628	7.10055	4.47365	7.20495	3.28348	8.25122	7.82399	11.2093	6.98527	7.89969	5.19401	18.8305	16.5471	18.5446	7.22765	9.4329	9.84134	13.4524	8.53453	5.33333	9.62106	6.59925	5.49938	4.20386	6.6928	6.63476	5.5838	5.593	5.93066	4.44747
Pita_unigene62448	0.455363	0.396724	0	0.214663	0.558164	0.286662	0.651605	0.328705	0.610697	0.244339	1.46798	0.772852	0.237784	0.438855	0.747902	0.437704	0.249408	0.854404	0.312087	0	0.251797	0.217174	0.590291	0.473698	0.379218	0.0965886	0	0.123452	0	0.312381	0.116014	0	0.0943205	0.213047	0.107117	0.15619	0.176987	0.644486	0.240823	0.462287	0	0.0926861	0.347439	0.486685	0.264911	0.638998	0.42899	0.0882038
Pita_unigene62441	1.42518	0.0489343	0.618318	1.21862	0.443355	0.535705	1.35535	0.742026	0.0893307	0.749706	0.493465	0.334983	0.684383	0.812458	0.339243	0.905543	0.945663	1.70382	0.210813	0.18884	0.154468	0.210175	0.998533	0.236367	1.99507	1.91771	2.09597	0.648772	1.65005	0.438827	1.28096	1.87851	1.30366	0.191363	0.35142	0.112546	0.68273	1.04278	0.801952	0.171941	0	0.507146	1.75412	1.92457	0.767787	0.944404	1.45041	0.5254
Pita_unigene62418	10.2182	4.11525	1.60056	8.98747	1.74219	15.8007	1.67692	0.828141	2.04486	3.89942	0.601354	5.62956	4.06464	0.767018	2.41631	1.56077	6.78329	3.69378	15.2845	5.08078	7.78417	7.81221	11.6987	21.3561	0.163825	1.48073	0.160514	0.144318	0.506154	4.30139	0.198139	0.35684	0	0.139383	0.353825	0.645445	1.72953	5.8093	0.364672	7.22742	4.0886	21.596	8.28875	14.1181	2.22872	33.4987	12.9451	34.9604
Pita_unigene62373	0.443096	0.484701	0.894358	0.538335	2.31735	0.509546	0.0739876	0.538601	0.236438	0.877646	0.434768	0.235539	0.253382	0.177503	1.89102	1.17126	0.133158	0.771467	0.103754	0.276469	0.417435	0.279257	0.374074	0.398611	0.75538	0.20828	0.232762	0.110097	0.192762	0	0.595652	0	0.364763	0.272943	0	0	0.481722	0.340645	0.467534	0	0.0465515	0.111156	0.641458	0	0.124366	0	0	0.192569
Pita_unigene62361	0	0	0	0	0.157227	0.0945919	0	0.0635615	0.0284817	0.0606997	0	0	0.0914445	0	0	0.0315889	0	0	0	0.157145	0	0	0.12256	0.0836889	0.106582	0	0.472015	1.68789	0.16783	0	0.125222	0.033039	0.0348741	2.94919	0	0.147384	0.488579	0.181797	0.258576	0.793389	0.475434	0.494957	0	0.0932871	0.284728	0.0285524	0.128679	0.0298799
Pita_unigene62358	0.167324	0.349813	0	0.230098	0.194214	0.379367	0.166528	0	0.339748	0	0.0872253	0	0.482457	0.340498	1.13925	0	1.06248	0.341211	0.113543	0.165457	0.442621	0.337831	0.310241	0.464765	0.0885585	0.445331	0.184752	0.516954	0.438781	0.166227	0.237055	0.917955	0.379707	0.935312	0.22284	0.136512	0.318045	0.34279	0.797368	0.626756	0.3001	0.145184	0.436974	0.496616	0.381134	0.540518	0.122573	0.0826427
Pita_unigene62347	1.58884	1.93001	1.23252	1.17366	0.146497	0.889562	0.566244	1.7933	1.94051	0.980316	0.228333	0.846099	1.21465	1.18473	2.50116	0.0784416	0.947563	1.16313	1.77027	1.53855	1.66312	0.114718	0.748577	1.04158	4.20399	1.01849	1.89621	2.47773	2.15452	1.32259	4.53924	1.73915	2.98832	2.95505	3.89042	1.43217	4.19548	2.02282	2.49087	2.11198	2.73535	0.779588	3.44518	1.84325	2.10046	1.84897	2.36788	1.23246
Pita_unigene62339	0.312321	0.514193	0.127127	0.639596	0.35528	0	0	0	0.30531	0	0	0.520251	0.197851	0.242727	0.421566	0	0	0	0.846195	0.148751	0.369189	0.139138	0	0	0	0	0	0	0	0.149428	0.435468	0.285527	0	0.164656	0	0.464138	0.171276	0	0	0.291502	0.216659	0.225332	0.176504	0.281411	0.3989	0	0.176525	0.168896
Pita_unigene62331	1.65303	0.320108	1.18255	1.33509	1.68437	0.270827	0.996933	0.682796	0.611893	1.43518	2.30273	0.328057	1.13526	0.716298	0.329834	2.98693	0.731495	1.33074	0.964245	0.586056	1.28119	1.80076	1.54527	0.399614	43.0977	1.4093	1.64764	3.4176	2.44414	15.8472	37.2556	1.94216	0.80025	1.84842	2.60108	13.8276	37.679	2.18838	1.2128	1.80268	2.1283	14.2865	45.1465	0.892237	0.408207	1.50899	2.30199	10.2155
Pita_unigene62328	4.0698	2.64309	5.49614	2.933	3.77432	1.44214	2.87717	2.44221	2.15944	2.37163	2.04592	1.37366	3.6001	0.882789	2.81378	1.30748	0.392327	2.98779	2.89964	2.5629	2.56213	1.19007	3.07819	1.38766	1.07406	1.5597	1.46503	0	0.190093	0.892611	0	0.422782	1.7424	0.144931	0	0	0.0453922	0.625135	0.244785	0	0	0.144915	0.620475	1.65322	3.40646	1.29335	0.854156	1.43706
Pita_unigene62325	17.0326	11.5949	12.6281	13.4255	15.2077	16.8217	10.997	38.9685	15.7765	13.9014	12.4178	20.8287	14.4279	34.6079	18.4786	24.555	19.476	12.1316	14.3482	43.734	14.9364	18.6173	14.0023	22.4529	28.4497	27.3544	27.8067	77.6737	62.2616	22.7353	59.9064	60.2291	49.9152	82.1166	71.4192	52.5654	63.9808	48.6623	61.5582	69.3246	78.1451	25.4012	32.4298	25.6325	46.991	35.9375	21.6253	18.7445
Pita_unigene62315	4.35947	1.72947	4.49924	2.31437	1.81432	5.90237	3.78212	1.68036	0.11423	0.926377	0	2.01595	1.33342	1.72402	1.1809	0.312787	4.71985	1.69132	4.3585	4.8442	1.52933	0.995518	2.78868	4.90379	1.05217	0.959954	1.71257	0.211378	0.766153	1.21561	0.562613	0.662483	0.164672	0.184376	0.143649	0.554294	3.15361	1.0692	2.24385	1.31552	2.5007	14.1185	2.49405	1.1364	4.54307	1.01154	3.42948	4.30229
Pita_unigene62311	0.501503	0.770056	0	0.884257	0.527845	0.180532	0.270054	0.0476152	0.271149	0.426151	0.113595	0.0432876	0.760926	0	0.46197	0.177702	0.14604	0.256028	0.618984	0	0.343127	0.419893	0.74073	0.1178	1.28086	0.164925	0.312366	3.89036	1.28379	0.243178	1.55037	0.222598	0.599323	2.44252	2.56045	1.90677	0.397449	0	0.333065	0.853603	1.7762	0.322684	0.377149	0.195636	0.532347	0.0690395	0.357272	0.0868196
Pita_unigene62310	1.05758	3.19641	0.8499	2.4115	0.291033	1.76526	0.974418	5.93409	4.09851	2.97664	1.6876	2.59789	3.23035	1.30489	5.41996	1.36717	1.21199	0.805554	1.5223	4.16288	3.77463	2.37774	1.88592	3.30933	23.0633	22.0846	3.01562	37.4386	7.82077	8.77693	42.6089	40.6913	4.3494	29.9273	11.9796	12.0399	28.2414	32.9896	8.02818	34.6525	10.5872	8.98139	17.0752	12.334	3.49757	19.2629	10.9974	2.01194
Pita_unigene6229	1.36639	1.34305	0.72674	1.06331	4.00557	0.863873	0.327705	1.36817	0.868417	0.420693	1.71178	0.33838	0.912815	0.82931	2.41617	2.06746	0.223629	0.884919	0.912332	0.6763	1.63097	0.858032	0.185341	0.383174	2.37477	0.494891	0.360893	0.250055	0.90275	0.135006	1.05453	0.785549	0.714449	0.117335	0.25635	0.190718	0.548716	0.644541	0.449611	0.178874	0.336415	0.312929	1.40866	1.1591	0.382219	0.314224	0.511514	0.25558
Pita_unigene62279	2.08786	2.28763	13.7169	2.60991	5.08668	10.0669	4.54219	1.76107	0.937394	0.960761	1.59414	2.55458	0.755651	2.47742	2.76432	1.47224	2.93376	5.54754	0.505156	0.64485	0.46283	0.562848	0.913416	0.838852	10.0012	6.6245	2.4942	6.53465	2.56394	2.69317	3.05319	3.49778	1.07057	2.42487	0.81408	0.592717	3.5947	4.12558	0.704487	3.17542	0.534123	2.28251	3.5811	7.04761	1.41081	1.43737	2.8226	2.35187
Pita_unigene62260	10.0921	7.81312	6.83388	8.79711	6.60557	8.30867	6.50098	8.90036	8.69579	8.20304	9.35926	7.11511	11.1644	13.6995	13.2596	12.1049	12.6953	12.2161	7.18591	12.1994	8.238	10.4284	7.19899	6.122	16.0484	10.8782	7.54988	45.7944	16.5904	9.0689	23.0794	28.3811	14.1351	39.3086	24.6725	19.7143	15.952	14.561	12.7791	24.7988	13.5107	8.92347	7.44953	7.0858	8.60501	9.668	10.7666	5.5859
Pita_unigene62243	2.71833	1.59701	1.07233	1.64676	1.85812	0.727432	0.332701	0.801903	0.93972	0.919134	0.809098	0.199784	0.917461	0.762744	1.13694	1.48973	0.483807	0.627989	0.377577	0.296465	1.19775	0.58339	0.394594	0.136271	0.306724	0.407116	0.308851	1.15042	0.666945	0.956917	0.229213	0.2091	0.224442	0.38753	0.390992	0.648437	0.0972865	0.0532687	0.12828	0.974849	0.541356	0.327775	0.187729	0.138858	0.0626942	0.445044	0.51048	0.357136
Pita_unigene62241	4.87759	5.00678	5.05237	5.7696	7.71757	5.13087	2.95613	3.77791	2.46728	3.03442	4.33346	3.30311	4.52161	3.16534	3.82358	4.83999	3.91811	4.28276	3.99886	3.09382	2.37501	4.06742	3.77379	3.58352	3.68929	2.61229	4.44141	0.726775	2.08523	2.64909	2.36588	1.75101	3.43817	0.206263	1.17037	2.09611	1.16864	2.30773	3.98462	0.172526	0.957302	2.58747	3.21183	1.92457	4.7994	1.05458	2.99863	2.27822
Pita_unigene62221	1.40208	0.737389	0.400772	0.201795	0.227569	0.447039	0	0.197847	0	0.28794	0.210958	0.218523	0.969262	0.160037	0.825941	0.683353	0	0.374327	0.65914	1.41647	0.196222	0.394913	0.200479	0.506818	0.266358	0.2403	0.160006	0.180972	0.595992	0.544607	0.29819	1.16051	1.09832	0.390005	1.12192	0.747428	0.400975	0	0.560623	0.33236	1.98112	0.186789	0.4059	0.938934	1.1361	0.146431	0.191499	0.234256
Pita_unigene62206	0.716701	1.23998	3.92034	1.17369	2.26126	1.59529	1.38954	2.39374	1.27372	0.964571	0.763779	0.423595	0.789246	2.18973	4.67636	2.75134	1.1728	2.15429	0.180007	0.740202	0.947529	0.585082	0.793086	0.459654	1.67242	0.239269	0.10415	0.112393	0.362127	0.530437	0.14729	0.350009	0.287452	0	0.03623	0.138852	0.251501	0.984108	0.15215	0	0.174862	2.11007	0.866786	1.4282	0.446963	0.26852	1.24897	1.19499
Pita_unigene62202	4.15072	1.2213	1.47505	0.831854	2.2703	42.5025	0.66781	0.467573	0.377116	0.357395	0.851992	0.240696	0.0448515	0.245275	0.50818	0.557855	0.118603	0.199766	0.0437531	0.277878	0.307069	0.516186	0.990986	0.164193	8.51932	6.31528	2.93526	1.31047	1.44052	12.201	4.3586	0.486315	0.924867	1.08485	3.30571	9.89851	1.07753	0.701103	1.1887	12.6273	1.92384	0.817666	0.160245	0.413623	0.483508	0.293174	6.36903	0.175599
Pita_unigene62171	11.4062	13.4062	13.8019	12.3682	13.3992	9.39122	10.6175	8.36169	12.2416	10.5567	9.54639	10.7205	9.17182	6.6173	10.9582	10.7233	9.32349	10.2046	6.17257	3.52651	8.00937	4.85556	8.15264	5.57426	6.30657	8.97253	10.5969	3.49377	5.91714	8.17771	3.90375	7.22219	5.39563	1.97465	3.08454	3.86858	4.64468	6.17043	7.75446	3.10569	2.79602	5.48114	6.67184	5.5341	6.99661	5.29035	3.80419	4.81202
Pita_unigene62152	2.77726	0.511242	1.8303	0	1.0182	0.881035	1.35305	2.59321	3.1564	1.6733	0.497707	1.31455	0.79665	0	0.419551	0.687772	0.62665	1.61654	0	1.13327e-07	0	0	1.12289	0.539394	0	0.488976	0	0	0	0	0	0	1.29058	2.71568	0	0	0	0.680404	0.947808	0	0	0.445687	1.45508	0	0	1.72823	0	0.653222
Pita_unigene62134	8.67207	2.22611	2.02546	0.429303	1.70463	2.07191	5.32308	2.38369	2.11563	0.277652	4.03548	1.71071	0.717828	2.24822	1.95271	2.58035	1.98121	6.29993	0.345191	1.74776	0.982145	2.58232	7.63122	1.39713	1.71339	3.99187	0.245219	0.127446	0	0.144241	0.9318	3.68316	0.1462	0	0.135129	0.329672	0.824922	4.79326	0.238455	0.056965	0.100882	0.238704	2.90031	3.72478	0.202659	0.256258	0.656093	0.667915
Pita_unigene62109	0.500252	1.05508	2.149	0.513584	2.34963	1.53146	0.710439	2.46611	1.56871	0.472695	0.828592	0.952054	0.333717	1.96321	2.83326	2.36746	1.15449	1.67295	0.687043	5.85849	0.963056	2.34102	3.48504	0.88797	1.83536	1.60231	1.95764	6.0173	2.73858	4.52385	2.21824	2.87173	2.83467	6.78232	3.10839	3.74056	9.13533	4.11476	7.71526	9.99372	6.97633	6.16374	1.1856	1.94749	4.15173	1.9127	4.14239	2.29477
Pita_unigene62075	57.4205	43.9767	29.6239	10.7232	31.1921	21.0093	76.3144	30.6196	77.4259	17.6616	108.439	42.1987	15.6601	15.9429	53.3614	80.1575	27.3661	58.6638	12.4268	11.1411	40.5146	21.1317	26.3556	18.1365	14.2065	11.2485	8.72004	0.738405	8.56928	8.3967	3.95115	12.5558	8.97544	0.107856	8.81887	3.13832	6.13173	12.8806	7.59178	0.895714	6.35846	9.93095	16.2994	29.1785	7.62299	4.52696	18.6132	17.6308
Pita_unigene62059	6.45404	32.436	59.0059	14.746	46.0672	17.7291	8.51637	36.0318	84.162	19.2374	64.9947	20.2017	20.411	59.1563	66.6637	68.8553	36.7836	21.0049	5.28671	18.0782	36.2975	25.0299	5.80515	12.8053	25.0291	4.06849	20.1143	0.255806	12.943	2.03889	19.0226	4.26771	47.3396	0.455257	8.94064	3.37498	22.4146	7.94129	31.763	2.18871	3.9812	12.0549	31.175	10.4961	28.8146	17.7107	23.403	10.2139
Pita_unigene62057	3.99378	11.6006	35.2612	6.08477	13.0479	7.46652	9.00015	7.7691	8.43709	6.02247	17.2364	6.39929	4.12019	4.84336	10.5471	10.6897	5.897	12.2108	2.59415	1.4159	4.25973	2.60769	4.55319	3.71726	9.12785	6.94385	5.28872	2.22896	8.55402	4.14589	5.94306	9.94501	6.65224	2.65436	4.04374	4.09685	10.8613	14.0474	13.572	4.17012	5.95357	16.7585	11.5019	17.5853	8.91584	12.1838	36.7949	8.96691
Pita_unigene62050	0	0	0	0	0	0	0	0	0	0.193845	0.0357984	0	0	0	0	0	0	0	0	0	0	0	0	0	0.23836	0.321021	0	0.872815	0.283333	0.0348059	5.28515	3.73977	0.242506	1.82029	1.71426	0.120041	0.560349	0.840771	0.112322	0.30867	0.20654	0	0	0	0	0	0	0
Pita_unigene62039	0.192803	0	0.602913	0.119984	0.151614	0.151694	0	0.955841	0	0.25564	0.0371806	0.59047	0	0.0668213	0.138556	0.456089	0.226767	0.0360967	0	1.58912	0	0.70362	0.442191	0	0.256439	0	0.141952	0.038295	0.0336527	1.55449	0.715123	0	0.0419808	0.258913	0.0740697	0.887202	4.73089	0.21869	18.6249	1.41532	0.143001	0.818077	0.0369194	0.0748768	0.380771	0.308749	0.618992	0.0359254
Pita_unigene62038	1.35706	7.96922	1.56047	5.00059	2.95824	2.13148	0.447639	0.537824	1.98803	1.09271	0.261909	0.207632	1.48348	0.706151	6.69288	2.27345	1.13118	1.39009	0.251662	0.600604	2.01787	0.123636	0.517591	0.590315	0.751407	0.21607	0.311891	0.268762	0.710229	0.828118	0.197976	0.209904	0.148042	0	0.195249	0	0.773956	0.614998	0.615183	0.0578856	0.817422	2.14975	0.324718	0.264236	0.805053	0.35984	1.01865	0.189001
Pita_unigene62017	3.4578	3.78835	2.0208	7.80758	13.6586	6.23493	1.58373	0.396025	3.5299	2.31858	2.89355	1.48399	3.26671	1.95745	8.14266	6.19462	1.73633	2.51286	2.24229	1.01488	4.65666	2.51923	1.55928	1.21926	3.5096	3.06079	0	0.738935	1.80097	3.43318	0.8507	1.44158	0	0.477993	1.16759	1.92913	0.968905	1.11296	0.184684	0.706663	0.754252	2.50061	2.60026	3.23701	0.438582	1.61891	5.80335	3.78791
Pita_unigene62012	0.572648	0.179486	2.16962	1.46223	1.19603	0.86614	0.499052	1.48897	0.27395	1.22109	0.934558	0.989153	0.635909	1.25973	0.642141	1.21566	0.976406	0.906285	0.477844	0.994549	0.204861	0.321428	0.210388	0.568819	0.634607	0.699123	0.0405317	0.524672	0.391558	0.247847	0.472637	0.227082	0.0959504	0.476069	0.465262	0.0405596	1.47248	0.749303	0.0888198	0.651418	0.611445	0.509323	0.402176	0.358158	0	0.391411	0.220871	0.128083
Pita_unigene62008	17.2261	10.3775	3.6234	7.20444	7.73367	24.7202	6.78345	5.34391	7.76736	3.80118	5.54024	6.90017	6.14477	6.91648	9.514	5.73132	5.98094	5.14061	3.12111	3.15007	9.31834	5.13692	5.20394	5.34873	51.6178	59.6935	12.7018	11.985	23.1651	140.721	14.7778	10.8291	3.54346	11.5219	17.5664	17.8806	4.70757	4.66769	7.31361	10.5368	5.27686	6.87324	2.89492	4.41935	2.02914	3.03333	6.26778	3.56132
Pita_unigene62007	12.9618	18.7436	7.88961	26.3036	12.3845	35.0143	3.22189	2.10862	4.06542	4.21495	0.871117	4.07854	11.3409	3.57888	5.72587	2.92329	5.32628	5.28764	7.47471	6.78439	4.55519	2.29165	2.39866	3.36632	102.273	30.8568	24.0127	419.358	93.3228	19.1278	108.86	126.008	26.6558	234.344	176.928	96.3038	13.6722	6.35709	2.46883	8.96776	10.1595	3.71658	0.987576	0.627615	1.59374	0.741521	1.48484	1.37765
Pita_unigene61980	4.25356	2.03503	1.57663	3.63307	4.07017	3.91726	2.10041	1.51011	0.673627	1.02605	1.67843	0.922536	2.12163	0.861385	1.115	1.88195	0.831517	2.17949	0.96176	1.64573	1.76883	1.06286	1.11395	0.818459	0.551183	0.83386	1.14841	0.328232	0.513579	0.648934	0.101788	0.159377	0.237102	0.189008	0.0708687	0.165635	1.6253	1.47645	1.66664	3.52188	1.21209	4.6861	2.31512	1.47689	2.26897	2.05661	1.10224	1.99853
Pita_unigene61976	109.697	23.531	42.6484	45.3635	20.1565	20.3057	76.7059	24.9479	14.5257	16.4193	25.581	17.3751	25.452	24.6244	15.9261	20.6275	21.8461	85.3583	22.2726	13.2001	13.2107	10.2075	68.2659	8.78733	34.3195	46.4817	24.2498	3.53502	13.7341	7.86923	11.7083	19.2948	11.6131	1.66111	3.9101	3.21297	11.2373	17.9252	14.0924	3.55657	2.91203	3.4647	41.9165	25.654	10.6931	25.6686	8.3963	5.25886
Pita_unigene61939	2.50483	1.758	1.0642	1.21307	2.16153	1.15509	3.56386	0.667895	2.14236	1.95266	3.71253	1.82545	2.28838	0.570588	1.48127	2.63216	1.28482	2.83679	1.21859	0.310891	2.01102	1.4425	2.37648	1.12114	1.82993	1.48844	0.446499	0.392515	2.02073	0.983073	0.865425	1.61071	0.625271	0.448859	1.0689	0.455935	1.75909	1.67928	0.55643	0.414854	1.47874	1.83823	1.6209	1.59714	0.438201	0.573285	1.81845	0.78184
Pita_unigene61924	0.254049	0.367774	0.620739	6.46048	0.921313	9.40194	0.248618	2.04672	0.105905	6.11653	0.782966	11.0809	7.36701	0.742314	0.316578	0.900776	12.4453	0.266912	4.90124	0.561864	0.616892	0.856143	0.245317	9.19734	0.873604	0.0431112	0	0.170541	0.643574	0	0.964635	0	0	0.10198	0.394987	0.0413229	0.774543	0.158757	0.077094	0.0373803	0.728022	0	2.30442	0.0812188	0.085053	0.0688239	0.736205	0
Pita_unigene61892	4.64573	4.01534	4.9115	1.99119	2.78764	2.93143	4.09529	5.15372	5.71952	1.97132	1.6369	1.97084	1.87619	6.79226	6.88238	4.97589	3.48607	4.0425	1.4474	4.36732	6.26098	4.42572	3.2623	2.46861	2.15977	1.39695	1.79241	1.14189	1.75644	0.667566	1.30322	3.13041	2.17154	1.41067	0.961298	0.366174	1.70217	2.17531	1.42189	1.00803	0.939213	1.32849	1.51934	0.739898	0.410726	1.86586	2.05252	0
Pita_unigene61886	0.101966	0.840478	5.11084	3.71705	5.60444	3.94179	1.69571	0.352909	2.68762	1.98057	0.434385	0.557274	0.645956	0.646852	10.5843	2.37711	0.876073	3.40351	0.524639	0.612233	0.847436	0.756934	0.719003	0.458444	0.727654	0.625806	0.114987	0.289317	0.471483	0.68659	0.105514	0.669051	0.0392104	0.113615	0.279138	0.754704	0.0749128	1.21133	0.351281	0.577849	0.465185	1.4068	0.423531	0.585124	0.280819	0.608642	1.28723	4.02445
Pita_unigene61862	0.632862	0.588316	1.78504	1.66304	1.20387	0.788199	0.756922	0	0.487319	0.519472	0.040685	0.301464	0.481473	0	0.947293	0.166338	0.177053	0.789388	0.0391407	0.0414102	0.235474	0.0384863	0.282152	0.110161	0.514342	0.178521	0.155295	0	0.184093	0.118683	0.0411631	0.173997	0.0459446	0.0404542	0	0	0.0401738	0.0478489	0.0850766	0	0	0.0406638	0.201968	0.204885	0	0	0.719379	0.157164
Pita_unigene61832	0.0437742	0.0428403	0.342179	0.185565	0.406923	0.0423562	0.141935	0	0.15287	0.366095	0.537965	0	0.166571	0.09477	0.154736	0.129454	0	0.287701	0.345323	0	0.0203742	0.159881	0.128519	0.076221	0.121357	0.225959	0.0395969	0	0.225124	0.114831	0	0.177136	0.261813	0	0.189332	0.275843	0.0417393	0.173896	0.154576	0	0.101487	0.0846401	0.188637	0.742603	0.211767	0.732528	0.474815	0.429056
Pita_unigene61821	0.968205	0.14156	0.435816	1.69083	0.0466869	0.678138	0.788703	0.353799	0.926035	1.95136	0.731163	3.21194	2.01052	0.136987	0.0425408	0.341853	3.27547	0.398563	0.873258	0.232624	0.0440666	0.576162	0.497743	5.99511	0.327638	0.24059	0.406134	0.431313	0.124035	0.415331	0.736686	0.14656	0.447818	0.32455	0	0.156803	0.399723	0.251249	3.84184	0.274815	0	0.228157	0.38823	0.184165	0.936124	1.7554	0.0950056	0.35279
Pita_unigene61815	20.0844	9.29454	4.05931	1.34064	14.2263	4.14624	14.0759	2.25572	15.3492	3.34032	24.3467	7.39089	4.15631	1.7912	13.1006	25.2408	4.34458	17.8305	4.84095	4.99792	25.8575	33.8151	33.5914	7.34165	8.89999	16.6575	9.63677	63.1585	16.7112	20.3974	15.569	31.2057	18.4921	76.0791	26.7523	24.2204	42.3506	16.6688	29.6368	79.9761	37.9623	23.2951	17.2421	25.1875	23.8358	37.3766	23.1406	53.4344
Pita_unigene61799	0.356834	0.821695	0.201798	2.40708	0.283381	0.886282	0	0	0	3.15036	0.00328724	0	2.46954	0	0	0	0	0.064654	3.62138	0	0.43483	0.429783	0.176254	0.485759	0.212242	0.545358	0.763725	0	0.934156	3.98163	0.749886	0.50049	0.512205	0.629325	1.39984	3.0301	0.318388	0.430966	0.673816	0.777589	0.768195	3.01146	0.862653	0	1.04403	0.629647	1.17379	3.47449
Pita_unigene61790	2.8661	0.0562404	0	0	0	0	11.1432	0	0	11.4133	0	0	0.420043	0	0	0	0.0330897	0	0	0	0	0	8.20681e-07	0	0.226248	1.04928	0	2.84205	0	6.8065	0.488062	0.523816	0	9.4391e-07	0	0.00101044	2.86992	2.44571	60.2432	14.5432	0	0.819717	0.734638	1.12806	0	23.102	0	0
Pita_unigene61787	6.38919	4.64459	6.67377	6.08829	8.15103	6.05584	7.57226	5.82646	12.8909	4.40817	8.66297	4.82311	6.22604	8.61637	7.32411	6.61822	7.98759	22.2604	1.92585	1.60551	3.87625	2.02515	5.21238	3.07892	5.08307	5.65955	1.41353	0.0551411	1.4327	0.417277	1.81298	3.61741	2.38418	0.106556	0.589693	0.243714	4.03461	5.87846	3.28564	0.222168	0.0689449	1.32916	4.91636	7.5965	3.55673	4.12725	6.24225	2.13196
Pita_unigene61775	1.4058	1.22639	1.00911	3.34254	5.1843	0.742067	1.10141	0.340007	0.518008	1.91587	1.42145	0.805161	0.880506	0.207931	1.23235	1.18289	0.259548	1.15637	1.49526	0	1.76519	0.531917	0.557203	0.208919	0.75331	1.05072	1.16775	0.0340661	0.14963	0.0964156	0	0.459542	0.485134	0	0.0658749	0.0946316	0.130665	0.0777961	0.311213	0	0	0.132345	0.853582	0.532427	0.880142	0.0305333	0.722661	0.351566
Pita_unigene6176	0.744642	0.494287	0.226923	0.191031	0.565417	0.357465	0	0.141591	0.127177	0.062822	0.20779	0.217766	0.0573616	0.158613	0.202036	0.259329	0.129702	0.463483	0.0627507	1.16208	0.0623554	0	0.136438	0.45322	0.692954	0.27606	0.416409	1.35573	0.70347	0.578	0.39524	1.01394	1.02319	2.32277	0.617522	0.123969	2.51082	0.813446	1.42036	2.31301	1.26471	0.929499	0.1263	0.226445	0.80203	0.33002	0.0619722	0.261544
Pita_unigene61757	0.566741	0.229581	0.182395	0.163591	0.181158	0.20052	0	0.324786	0.143739	0.872171	0.39432	0.130807	0.447732	0.18497	0.276806	0.292534	0.294551	0.192114	0.194508	0.65642	0.0920249	0.799273	0.455111	0.212104	0.561052	0.355279	0.426215	0.68742	0.505876	0.607913	1.90442	0.500843	0.460179	1.53484	0.533449	0.578856	1.59921	0.922492	2.89199	1.47714	0.791675	0.529993	0.27701	0.14591	0.578263	0.351021	0.8056	0.0715253
Pita_unigene61705	9.42151	10.9161	20.0176	19.5593	16.8164	17.0361	20.6916	15.0327	9.50059	12.5909	10.0739	10.0261	16.8536	19.196	22.7026	13.477	12.6023	19.2781	15.9512	16.7031	15.9408	10.2123	14.7755	8.66357	9.25161	7.40667	8.76096	3.13577	5.26023	9.02838	2.80482	6.21886	7.30298	2.56232	2.9062	6.27994	6.96592	8.88867	8.30243	3.38626	5.23509	12.4443	8.90572	11.233	17.7635	5.3495	8.52152	24.5162
Pita_unigene61697	0	0	2.06938	0.782818	0	0	0	0.812351	0	1.82363	0	0	0.893726	1.70878	0	0	0	0	0.317186	1.15485	0	0	0	0	6.33393	4.23607	4.04084	0	9.26328	5.32032	9.50601	7.63583	4.10712	0	14.7572	6.00219	5.67722	2.45825	3.38187	0	6.34496	2.86978	1.09982	1.71535	1.7719	0	5.09847	1.34812
Pita_unigene61677	0	0	14.9498	0.766812	3.87341	1.58152	0.0799347	0.167862	0.139286	1.20269	0.285724	0	0.161013	0.256757	2.8131	2.25288	0.142098	0.39597	0.0785362	1.08018	0	0.115834	0	0.221039	1.50114	0.223882	0.545301	0.168084	0.110815	0.0793803	0.991115	0.0872819	0.138284	0.0405854	0	0.467621	0.0806085	0.14776	0.38409	0	0	0.203977	0.1621	0	0.167218	0	0.806621	0.0788365
Pita_unigene61645	0.19649	0	0.979069	0	0.292255	0.290395	0	0.868792	0	0.112023	0.313372	0	0	1.48677	0	0.430135	0	0	0	1.07787	0	0.422438	0	0.0514509	1.02472	0.487659	0	5.16488	0.184964	0	3.90271	2.78319	0.193404	11.5087	4.40522	0.163556	0.261651	0.393216	0	2.58043	0.757691	0	0	0	0.0584425	0	1.10602	0.274793
Pita_unigene61579	0.0935705	1.77053	0.258194	0.922179	2.25847	0.0919766	0.220807	0.231895	2.03658	0.974873	1.84997	0.0954996	1.37914	0.16219	3.19248	1.70613	0.340958	0.218658	0.260394	0	2.21913	0.640018	0	0.0407161	0.155529	0.148562	1.16219	0.185701	0.0816491	0.0438787	0.0912397	0	0.815423	0.0448376	0	0	0.0445346	0	0.14149	0	0	0	0	0.181835	0.600798	0.498556	0.0469066	0.0435462
Pita_unigene6157	0	3.00061	2.10986	0	2.34291	0	2.86446	0	1.04579	1.99802	3.51375	0	0.981409	0.94842	0	1.0766	0	0	1.02836	1.12193	1.10033	2.05767	1.12499	0	4.99688	0	1.08116	0.98732	4.02062	11.7029	2.87701	7.05551	1.17845	1.00907	4.27332	2.12372	3.93284	4.81332	1.17274	0.850641	4.11674	4.28795	6.30485	1.07972	1.1596	1.88304	4.52166	5.9546
Pita_unigene61566	5.90601	11.9088	20.9748	18.6707	25.5782	12.7737	14.1835	30.1639	20.6142	17.9931	32.7931	13.1491	26.0554	32.6733	23.8785	23.635	20.1619	18.5274	19.1462	42.2661	16.8162	29.4132	13.2968	21.0585	20.4683	19.1771	20.6958	34.6014	23.972	40.4844	42.2786	57.6247	37.9517	96.9517	74.8097	103.475	34.8079	63.3251	63.2193	58.5548	61.3557	64.1172	15.1591	49.6245	62.3167	40.5738	46.4151	52.6227
Pita_unigene61549	91.0279	94.1223	94.8773	67.9043	68.2121	75.1485	167.03	82.4269	145.531	105.71	94.2497	140.428	113.026	47.6257	111.424	162.65	108.878	134.608	79.082	32.6487	99.5124	83.381	86.9906	75.6953	37.3552	44.9108	58.8565	18.3198	35.1517	41.1847	24.6634	42.208	40.1522	7.58249	17.8868	14.0971	40.2288	40.9698	49.4538	12.5018	15.3769	42.0272	76.5685	55.4598	82.442	49.0452	39.0747	53.3983
Pita_unigene61530	0.806707	2.69865	1.46927	0.87644	0.694944	0.686053	0.894856	4.24593	2.59617	2.32388	1.60241	1.28667	2.51333	2.962	1.96429	2.54319	1.10531	1.83178	1.81688	4.60159	1.04033	1.31255	1.08097	0.594889	2.42144	5.1287	3.81329	12.3967	0.870991	2.07274	7.91537	6.49143	4.87345	15.4295	2.71583	5.51101	5.28817	6.4396	3.84975	6.37519	2.30335	3.46771	2.99175	4.90656	3.21954	1.93476	2.22027	1.86389
Pita_unigene61500	3.03161	4.17396	2.63156	3.32062	3.00975	2.54674	2.47807	2.29691	1.99793	1.41942	2.26597	1.91278	3.27218	1.62303	3.18315	2.48459	1.8337	3.0955	2.52846	1.36986	2.28201	1.24338	1.40018	1.45286	1.35936	1.0798	1.47365	1.3199	2.64597	1.5006	1.06453	0.842825	2.0261	0.457649	1.79971	1.37881	0.835858	1.19795	1.20235	0.552483	1.23173	0.953249	0.945836	1.15703	1.95051	0.546026	2.83757	1.36533
Pita_unigene6143	1.40483	0.918203	2.90727	0.592022	1.46933	0.992705	0.911848	1.91501	1.32613	2.53636	1.82046	1.29948	1.0437	2.16853	2.6808	2.55291	1.06804	0.862191	0.570163	2.11164	1.14335	2.52271	3.31293	1.45189	1.11898	1.06835	3.31239	7.23356	3.40957	1.23504	10.1061	3.84735	1.19532	13.5097	3.2037	3.63798	6.85477	2.58882	12.1715	8.2807	3.17445	3.08798	1.13481	0.597027	4.76968	2.22358	8.9812	0.817509
Pita_unigene61402	1.59198	3.52769	2.05885	1.26904	3.6844	0.376167	3.33193	3.73996	6.37389	3.8498	6.36847	1.42666	3.56279	1.9863	5.69974	7.34684	1.03525	4.27334	1.91464	1.39174	2.2864	2.68467	1.14891	0.592563	1.99784	0.274385	1.4997	1.13057	0.64344	0.99767	2.2949	0.591049	3.19071	1.67914	0.787023	0.374461	3.78723	0.898433	3.34103	1.53696	1.01263	1.6947	2.53692	1.11211	1.87632	1.24183	2.54972	0.82007
Pita_unigene61399	2.23233	3.63024	2.49115	1.53822	3.2275	4.12436	1.5235	2.43031	1.63352	1.25206	0.528474	3.09488	2.14693	3.91073	1.9277	2.47921	2.79504	1.69231	1.16691	5.56589	1.35026	2.06002	2.06558	2.52623	6.61331	4.12186	2.7309	21.3884	5.03796	2.78041	5.20871	8.90939	2.98272	11.912	7.04463	4.0931	1.98142	5.19502	1.91881	4.30491	3.52806	2.95695	2.59357	2.46862	2.96047	3.97703	2.97793	1.74374
Pita_unigene61372	2.26655	5.28259	13.0767	7.42655	6.66749	17.4334	75.8615	14.8076	13.2294	25.3955	57.2653	20.0413	17.7975	20.8367	6.82623	29.8263	33.4274	96.3351	24.6665	2.14095	4.59862	19.6465	76.0181	14.0481	4.84524	3.35682	6.17017	0.33381	6.48082	0.438755	4.94677	4.41018	15.3893	0.169342	11.4341	4.72559	1.24946	3.68934	12.4937	0.991313	0.459106	4.4697	7.3176	15.9734	11.1015	36.8628	86.4506	17.4011
Pita_unigene61342	1.73095	5.36838	63.4855	13.1935	34.3464	13.4884	5.37614	5.34356	6.67132	7.37102	2.87039	0.294778	1.82971	6.37765	30.8841	11.3124	0.979288	10.8575	0.446367	1.41088	1.97064	0.439383	2.57965	0.669816	13.8143	2.66267	2.56983	0.958317	0.950892	2.4301	0.377132	0.792852	1.63067	0.0926005	0	0.70547	2.47939	2.83988	6.50267	0.197957	0.267566	6.61941	4.69716	1.11652	0.758456	0.689967	3.09585	5.12747
Pita_unigene61321	1.37367	1.63453	7.79051	2.17989	8.93107	2.31644	1.92972	3.45146	1.9054	2.51199	3.49822	1.46401	1.71538	2.4377	4.93681	7.17412	1.84695	4.34968	1.33582	1.75815	1.14454	1.79292	1.69248	1.30201	1.52808	0.93723	2.89197	0.421172	0.902767	0.753177	2.0697	0.629417	3.34074	0.407589	0.403458	0.911446	1.36686	1.61306	5.81938	0.348646	0.406565	1.91684	2.38168	1.18982	3.28098	1.58768	2.37419	2.55995
Pita_unigene61310	15.8653	14.8603	8.12302	4.0987	14.0994	6.55226	25.3642	13.7973	22.8149	8.77294	27.7129	14.9362	11.5318	15.7531	18.342	27.2358	15.7212	24.5839	8.31991	4.09634	16.8763	10.9857	14.5074	9.36772	6.20018	5.03189	4.61905	7.88765	8.57813	3.97711	4.25692	5.8482	8.61691	5.76389	2.34075	2.38543	11.3925	11.8723	8.82166	10.0431	6.91823	7.71472	16.9707	12.8646	11.7135	18.2581	11.923	4.26393
Pita_unigene61306	92.3746	107.655	40.7069	99.9833	74.4049	82.1915	90.4805	24.6898	44.6702	62.3862	34.4644	76.2588	72.3489	26.8905	74.018	56.5198	66.3385	84.8884	48.1723	24.5937	67.9584	55.0891	46.3124	45.727	28.2768	39.8693	35.2164	14.6695	23.5817	35.9884	9.54873	21.7474	12.8733	7.44488	9.89919	7.54514	19.495	19.9128	11.4383	13.2198	13.879	21.6292	51.9249	25.1157	31.9981	28.0525	37.3846	25.9857
Pita_unigene61295	2.1593	1.05315	2.46263	1.77046	2.38525	3.50092	0.910281	0.916942	0.498143	0.890534	0.393659	1.16845	0.735278	0.909123	1.38209	0.810675	1.33781	1.84534	0.254561	1.31216	0.344364	0.372829	0.822334	0.863327	1.1928	1.47412	0.854814	0.329493	1.11834	3.78657	0.302371	0.611829	0.324275	0.0636564	0.230069	0.446457	0.612935	0.867277	0.583911	0.11313	0.261341	1.24301	0.533865	0.385324	0.142406	0.428172	0.569531	1.14655
Pita_unigene61287	0.645124	0.917834	1.01721	0.191214	1.40702	0.181189	1.73992	1.23338	1.51468	0.436444	1.19989	0.423281	0.219093	0.399356	1.24125	0.499586	0.154538	2.24005	0.256474	0.316692	0.0428577	0.756474	0.968226	0.40103	0.204252	0.341389	0.12719	0.0914576	0.201049	0.950753	0.943662	0.380083	0.100387	0.0883306	0	0.466803	0.482522	0.209008	0.836168	0.196638	0.0427168	0.399477	0.176461	0.179083	0.18207	0.409267	0.231012	0.128681
Pita_unigene61285	2.56692	0.32253	1.30466	0.315244	1.78039	0.631319	0.60632	1.4737	0.270145	0.319869	0.976874	0.103453	0.22487	1.0241	0.42489	1.49241	0.113647	1.07591	0.0626779	0.993849	0.291482	1.44865	0.645762	0.0587997	1.9962	1.32045	2.54379	1.24167	1.00229	1.56563	3.09485	1.53213	2.41666	1.87387	1.23295	1.04717	1.7742	1.03457	2.61928	1.64346	1.03343	0.708417	2.08232	0.950558	2.16743	1.13329	1.26858	0.486266
Pita_unigene61274	4.27333	1.45015	6.44176	2.42652	5.57449	2.79395	4.22133	3.74806	0.895994	0.90763	1.90357	1.24997	2.26058	3.19101	0.463849	2.92639	2.62361	4.05163	1.43299	5.46355	2.11629	3.52059	4.67607	1.44171	1.35172	0.686358	2.75151	1.64217	5.43787	1.11898	1.20086	0.555868	0.68867	0.637025	4.47177	0.367796	0.609096	0.845766	1.04161	0.989458	1.4981	0.160822	1.48696	1.73007	1.23742	4.78768	7.53594	1.68806
Pita_unigene61242	0.228897	1.10557	1.11874	1.14305	0.184603	0.506847	0	0.385536	0.559657	1.31769	0.378081	0	1.34419	0.94087	1.20578	0.87254	0.612104	0.165168	1.67214	0.510861	0.81074	0.564199	0.203698	0.604001	1.62167	1.79288	1.14937	1.42475	1.7999	1.05884	1.84203	1.00165	1.97355	1.05368	1.58151	1.22325	1.39123	1.58375	1.58286	2.04469	1.28463	2.49551	0.800627	0.557568	1.84109	2.78084	0.421714	1.28719
Pita_unigene61233	2.71907	1.62056	4.68697	2.02943	1.54086	2.03807	1.96143	2.51261	2.42808	2.90979	2.5827	3.64753	2.34595	1.60768	1.72698	1.49162	2.18877	1.26589	1.81319	1.70539	0.908598	1.54397	2.65389	1.93893	3.25761	1.4986	1.86289	0.549071	1.23175	12.9436	1.98219	0.937158	1.68692	0.297859	0.505938	2.04741	3.32877	1.64282	3.30196	0.568272	0.628094	4.4514	4.35022	1.87405	1.67634	1.83207	2.55449	1.818
Pita_unigene61175	0.70476	3.12983	3.62772	5.1635	8.3634	1.807	3.48602	3.97211	3.95148	16.8255	11.9195	3.06416	13.0391	4.92876	4.25647	14.1811	4.20089	3.12236	11.6565	3.20611	3.30928	16.4618	1.95079	2.51713	1.97042	1.78801	9.94009	1.32629	1.13057	1.72373	1.57192	1.69122	10.2402	0.575555	1.73149	1.7029	3.70634	2.2742	14.7229	2.313	2.20852	2.63539	4.33802	3.00841	17.5631	2.56869	3.97657	5.24608
Pita_unigene61131	0.647887	0.501487	1.05958	0.224186	0.928331	0	0.746066	0.713167	0.447334	0.545566	2.98741	0.440516	0.273698	0.624382	0.83896	2.4119	0.659329	1.54069	0.266973	0.283293	0.468223	0.91798	0.274478	0.250497	0.318836	0.38227	0.0661686	0	0.125575	0.33798	0.559818	0.445398	0.471321	0	0.138071	0	0.342034	0.652334	0.362542	0.0614078	0.0667055	0.414421	1.30905	0.841333	0.427129	0.381415	0.864276	0.200421
Pita_unigene61125	16.4341	0.678726	0.564	0.157135	1.89056	1.14946	0.4056	2.38267	0.124946	0.468632	0.112602	0.178918	0.0833321	0.67989	0.14183	0.043972	0.0983821	0.410742	0.108395	2.11485	0.054354	0.419286	4.3154	0.324113	1.10137	2.00444	4.19137	1.23604	1.21121	85.0357	2.32539	0.9935	0.285953	0.761104	1.56215	18.1912	0.350647	1.64993	3.34394	0.835207	1.62247	13.3235	0.0559258	0.0283282	1.22748	0.0260347	4.61304	2.07775
Pita_unigene61118	1.74593	1.25428	1.41668	4.08011	3.61103	3.97448	0.677007	1.12642	1.72274	5.21031	5.00264	4.61584	3.81502	1.20633	0.983349	4.11805	3.71417	0.884217	3.53302	0.950791	0.858978	4.34397	1.49509	3.76205	0.683015	0.861535	0.398898	0.606472	1.05115	0.415707	1.28113	1.28223	1.67183	0.766967	1.06055	1.46565	1.61957	0.992883	1.83312	0.975349	1.13383	0.891282	0.895436	1.38003	1.63538	1.15045	0.699504	0.950028
Pita_unigene61062	7.74269	16.2579	5.95972	12.1509	9.10742	8.25242	8.80113	5.18738	12.8	11.9692	11.7083	9.70471	13.1557	5.70317	17.4109	13.1355	10.195	11.6571	6.19754	4.06527	6.60261	5.94554	5.49144	7.88702	7.24101	2.54707	5.83509	2.02372	9.35681	14.4271	4.48658	1.01345	4.24675	1.81871	7.53333	4.27605	14.2752	6.82868	12.3638	9.70494	16.9272	13.6091	5.99074	3.1163	6.41077	4.54494	8.25555	6.79404
Pita_unigene61043	12.0023	57.6402	54.7872	11.6198	54.4215	14.5419	12.4814	62.3184	49.2574	9.20901	47.1098	11.2643	12.5018	54.5544	48.7329	47.3143	13.332	15.5377	11.363	66.0549	54.1476	53.3804	8.17763	11.8896	74.9968	71.1996	58.5092	103.813	76.5932	59.0709	73.6249	63.0306	60.9446	87.6725	82.9082	72.5261	66.0435	69.2368	60.5501	100.351	80.3411	47.622	47.8145	47.2583	46.849	62.2021	55.0557	47.5745
Pita_unigene61031	26.1713	1.7131	3.2129	0.595015	1.64594	0.922117	24.3986	3.72055	1.99123	0.246903	0.553158	0.532009	0.396562	6.82383	11.4644	2.41838	1.0037	16.8936	0.338489	1.79235	0.630208	0.285201	27.0746	0.952712	1.03969	0.496995	0.33569	0.0517054	0.864263	1.32051	0.203208	0.26877	0.39768	0.449418	0.300915	0.0960747	0.24804	0.709229	1.31365	0.355913	0.0483241	0.903089	0.998151	0.91226	3.09065	1.8034	3.34375	6.44976
Pita_unigene61010	8.51043	5.44567	9.06507	8.39491	7.15861	7.37211	8.15869	11.4068	6.70702	9.445	8.83318	6.67094	7.18189	9.51505	7.2835	8.57974	7.47473	7.84792	7.94019	7.33535	6.7809	8.09234	7.62581	9.17046	0.451621	0.101077	0	5.36994	0.133545	0	0	0	0.100318	5.71322	0	0	0	0.105094	0.630299	8.1565	0.0880218	0	0	0.266519	0.118983	7.87382	0.154171	0
Pita_unigene61007	1.10556	0.965357	1.30537	0.421962	0.686618	0.224351	3.72309	1.03405	3.77558	0.944866	3.44131	1.07304	0.851712	1.887	1.49375	3.13108	2.06256	4.68547	0.094256	0.29942	0.538271	0.981785	1.22101	0.562844	0.790102	1.12999	0.560873	0	0.315665	0.142985	0.368708	0.838202	1.56471	0	0.0487722	0.187869	0.48617	3.2834	1.5876	0	0.0941941	1.06078	1.20269	6.12548	3.25082	1.39174	1.52481	1.74897
Pita_unigene61000	3.01927	0.52287	5.14124	0.361043	0.852546	2.79507	1.61405	3.69114	0.358981	0.622903	1.66279	1.35388	1.13811	4.26176	0.220112	1.15795	2.04228	2.3956	0.346773	4.92089	0.177529	0.678025	1.70576	1.94971	0.938995	1.16089	0.684612	0.778316	0.0847158	0.0566406	0.332022	0.752377	0.535114	0.485035	0.118721	0.0448363	1.63624	1.49949	3.06451	0.880414	0.370997	0.0438635	0.851127	0.799602	0.827707	1.90425	0.199595	0.112394
Pita_unigene60943	1.71823	1.93153	1.83405	1.349	3.55972	1.54493	0.9852	1.23916	1.62562	1.41881	4.47807	1.70035	0.656332	2.29096	2.87779	4.19736	1.80913	0.885891	1.1339	2.2564	1.32524	2.79773	1.28682	1.10071	1.88516	3.85219	8.86371	3.32264	7.08865	2.03808	2.25908	3.22137	6.6721	2.88748	7.27952	1.73759	2.58796	4.86025	10.3457	5.70485	6.98569	4.9255	1.07332	2.92646	5.25721	1.96254	6.30585	1.87194
Pita_unigene60928	0.352421	0.800027	0.630184	0.54802	1.24452	0.597638	0.981453	0.349602	1.23589	0.723069	1.13212	0.479953	0.465659	0.389941	0.739542	1.56336	0.462923	1.177	0.127203	0.134276	0.364543	0.607907	0.487161	0.272742	0.499409	0.330377	0.144255	0.272732	0.461508	0.146712	0.363952	0.222018	0.19159	0.11291	0.244665	0.0899449	0.410779	0.244469	0.237061	0.183902	0.308678	0.378705	0.693743	0.645172	0.231812	0.297376	0.767299	0.45704
Pita_unigene60916	1.5332	2.07458	1.70942	1.63965	1.95072	1.26183	2.35887	1.5262	2.54448	2.28887	5.53505	1.7621	1.32674	0.564798	3.21	2.99257	0.315394	2.24916	1.71634	1.04534	2.26988	1.44743	1.93534	1.39257	1.52346	2.08174	0.773346	0.170927	0.562196	1.02197	1.00281	1.66428	1.22007	0.25227	0.470941	1.07378	1.48673	2.99885	1.46386	0.838853	0.300032	1.87214	2.43703	2.55031	1.19184	2.84706	1.64539	1.89802
Pita_unigene60910	8.04116	2.16808	12.0951	4.74682	2.5806	11.0064	4.48778	19.2028	3.23652	7.91054	1.92795	8.79698	5.78784	23.1771	5.50537	2.58345	8.98072	6.48087	10.3856	25.4259	3.51236	3.93055	7.00193	13.5326	16.5914	9.35477	6.25426	25.7513	7.71479	13.54	30.0725	23.4978	12.1934	26.2765	9.93916	19.1856	27.1117	21.6129	17.0198	24.6082	15.1559	17.6352	20.2881	11.6524	14.6122	11.6048	15.4589	19.8537
Pita_unigene6091	3.61276	2.92343	1.03842	1.35857	1.24516	0.799108	1.96107	5.73046	2.24675	0.727126	1.30654	0.783576	0.90182	3.99193	2.10863	1.29078	0.871056	1.5623	1.6757	5.67482	2.81418	2.34774	2.76057	1.37558	3.10273	3.53642	2.49306	5.60241	2.44324	4.06567	8.85273	4.93545	4.57444	5.67061	2.8184	5.19818	4.51415	4.50646	4.0519	8.55643	3.80962	3.87199	2.07525	3.07107	4.23759	4.53324	2.71697	2.94287
Pita_unigene60909	22.4859	21.1999	11.6471	25.6544	19.4726	11.7258	26.2052	6.87877	12.3305	20.5219	10.3353	10.3051	29.6832	11.6863	19.4959	16.5248	16.8391	30.6155	20.6764	10.6454	18.5835	13.3616	30.7261	11.2873	9.16112	1.12543	4.34803	12.4581	14.5641	10.435	7.11442	1.52102	2.92143	7.52553	10.9598	11.5175	9.18119	1.70761	5.55565	5.50147	12.4245	12.8882	8.9004	0.938748	3.67427	5.47433	12.9077	9.41883
Pita_unigene60892	1.15506	0.104557	3.63038	0.60636	1.47322	0.838827	2.71192	4.84636	0.339413	6.47816	1.69908	0.23676	4.70324	4.74676	0.20825	2.97188	1.58013	2.46459	1.18382	9.78344	0.378695	3.35902	2.90854	0.462647	5.29333	3.2852	1.85172	9.87424	2.30178	7.07543	17.7043	11.4238	0.343287	11.0329	5.12813	14.9713	7.11338	12.2743	8.70773	7.1879	2.91085	9.04997	6.66835	5.44378	1.40694	9.10372	2.44151	5.29644
Pita_unigene60885	0.293807	0.847439	5.3378	0.46216	0.280333	0.692515	0.268018	6.37506	0.144971	0.287044	0.462989	0.835459	0.290219	4.92084	0.620982	0.618205	1.2084	0	0.278396	6.56678	1.08148	0.703523	0.146678	0.920739	0	0	0.411814	0	0	0.142928	0.88668	0	0.307794	0.143306	0.160729	0.150385	0.610762	0.375202	0.300798	0.131195	0	0.150644	0.556017	0.45077	0.287047	0.137456	0	0
Pita_unigene60878	24.5162	23.054	22.5947	30.92	26.4868	38.4301	19.449	21.8764	23.1975	33.8401	35.0087	35.6801	37.6357	23.5262	21.0814	32.469	39.2088	20.4588	23.4372	22.9252	25.6709	29.7978	24.0158	33.7955	75.2565	33.0946	45.5588	177.629	88.8367	33.7977	99.8224	78.7306	68.0654	155.454	113.796	52.4485	114.409	43.9327	57.5498	108.138	92.2179	39.9172	43.0666	23.8619	37.5694	36.0828	35.4625	19.601
Pita_unigene60865	4.08363	2.83095	2.07995	2.36157	3.47013	3.60587	4.73987	2.38482	4.029	3.30544	4.13446	1.89557	2.83849	2.50374	4.55354	3.08483	2.70271	4.28154	2.36607	0.82547	2.7016	1.46418	3.2402	2.45543	3.36539	2.30617	3.63463	2.04114	3.36947	1.83592	3.34228	2.70744	2.91175	0.852056	1.03953	2.04761	1.05707	0.791532	2.04877	0.892762	0.867634	1.82062	2.60139	2.01761	2.46138	3.17387	2.62562	1.16143
Pita_unigene60854	1.15432	0	0	0	0	0	0	0	0.38576	0	0	0	0	0.484062	0	0	0	0	0	0	0	0	1.03412	0	2.19399	0.44837	1.22301	0.84354	1.0769	0	1.39345	0	0.833925	0	0	0.277245	0.360718	0.612878	0	0.315975	0.689461	0	1.22053	1.02658	1.24175	2.42333	0.827949	0
Pita_unigene60797	601.735	363.595	571.168	603.139	232.981	371.506	596.382	267.626	342.848	689.313	430.149	388.419	578.616	251.916	197.332	306.314	302.958	393.776	482.79	228.174	264.193	314.53	449.52	328.619	162.735	387.661	317.803	65.8643	101.555	272.151	94.0641	180.744	179.794	24.2886	37.2064	73.0734	106.741	236.548	322.829	64.6546	44.8793	157.394	633.338	354.44	386.512	523.343	165.08	308.975
Pita_unigene60790	31.5604	36.5509	49.2228	49.179	42.646	32.882	48.7122	24.2239	54.9755	32.1532	25.4343	22.3287	44.1487	50.2901	58.0196	47.6611	43.1969	68.9256	14.2164	13.5054	53.1207	23.921	43.8118	22.5213	15.7105	14.2	12.5447	5.37029	17.7428	10.2898	8.01278	11.9061	14.1169	2.23681	9.83931	6.81741	5.46372	10.6394	10.3816	1.9554	4.70613	15.6115	21.4211	18.3365	22.5318	23.9216	24.6954	29.6256
Pita_unigene60784	0.313297	0.208123	0.0720319	0.0541405	0.23019	0.179879	0	0	0.139244	0.0741727	0.226488	0.13331	0.124176	0.0904496	0.9623	0.0257359	0.110037	0	0.266514	0.153555	0.170098	1.27633	0.0998919	0.277903	0.665819	0.137792	0.120196	0.493248	0.136742	0.0489243	0.612545	0.430644	0.175985	0.702139	0.100357	0.0960065	0.423084	0.651821	0.869129	1.2037	0.363152	0.252247	0.0250006	0.050638	0.489572	0.209628	0.78663	0.292313
Pita_unigene60759	0.220172	0.964552	0.748105	0.281215	0	0.228555	0.34827	0.192022	0.447423	0.164373	0	0.237243	0.106467	0.302042	0.208761	0.438276	0.325385	0.705733	0	0	0.0853419	0.247366	0.228677	0.0674251	0	0.150402	0.142586	0	0	0	0	0.199666	0.210845	0.0371523	0.0372001	0	0	0.351466	0.147607	0	0	0	0.0370844	0.497266	0.229486	0.320975	0.155438	0
Pita_unigene60732	3.80809	1.02212	4.03038	2.5487	4.79814	1.20362	1.25509	1.89352	2.0496	1.62919	3.15834	2.07991	1.52889	1.34229	2.54662	2.93298	0.278355	2.90922	2.44758	3.12533	2.61374	2.30929	2.35543	2.42318	4.27354	3.4283	3.34906	2.15562	3.02824	2.6887	2.33062	7.2197	7.84378	3.88049	5.32221	2.40166	5.39435	6.22985	3.53915	3.31211	6.89048	5.61527	2.23421	2.95509	2.33428	2.09461	2.81604	1.95269
Pita_unigene60721	15.1448	13.686	15.3917	6.20698	10.1308	11.8084	10.9863	9.03578	13.2466	6.02107	6.62684	14.2167	7.06732	9.52009	13.346	9.90506	9.24729	10.3551	6.93761	9.40847	7.69476	8.89729	18.9725	13.3429	13.2599	15.8323	20.0406	38.4057	34.7105	44.1899	14.722	24.097	18.5342	29.1632	26.0288	28.3267	30.3009	20.0878	26.2464	29.2415	35.5313	44.0299	12.3509	12.0357	15.3758	17.1434	15.3716	14.5749
Pita_unigene6072	5.45024	4.13619	3.82892	3.55768	3.0068	5.34621	4.93297	3.18248	3.74915	3.70868	1.83746	2.63716	3.92533	1.58589	3.64805	2.55678	5.08212	3.33255	1.90746	0.562205	2.61341	1.03942	2.83568	2.70781	2.80826	2.41577	3.15823	1.2496	1.39887	0.581181	0.979826	2.23773	1.17679	0.647776	0.50237	0.435182	2.06722	2.23101	1.77477	0.99493	1.30524	2.53316	2.763	2.16532	2.4271	3.59691	1.76109	1.3214
Pita_unigene60699	214.605	435.623	1057.75	939.861	353.332	505.215	887.188	1183.89	860.122	1007.84	1066.01	486.496	857.692	1276.47	696.434	733.984	629.73	1115.7	776.17	439.585	303.131	424.037	1039.91	484.625	353.345	332.131	261.849	17.0956	119.53	54.2344	733.083	379.046	598.204	11.9947	91.1096	123.124	399.075	407.842	666.982	48.5456	16.1712	121.506	1459.9	1068.27	515.982	1069.79	736.418	196.038
Pita_unigene60695	0.228489	0.501902	0.493378	1.1411	0.56992	0.530828	0.261967	2.81593	0.427345	1.91983	2.12985	0.246762	1.88685	2.64057	0.271725	0.90663	0.529591	0.598246	2.78785	4.58776	1.46371	2.69068	0.446337	1.53544	3.7652	3.01743	0.404657	17.6847	1.38813	0.670722	6.03272	5.64737	1.58574	18.3437	7.11728	7.04964	1.14266	3.81759	0.735394	5.3572	2.17335	1.71379	0.983023	3.01378	0.730897	3.6778	1.51259	1.18761
Pita_unigene60666	2.40179	1.81241	2.21972	2.26915	4.87729	2.79549	1.38085	1.05391	1.3449	1.19485	1.53671	1.78051	1.96767	1.05671	2.58775	2.57495	1.44519	2.02867	0.839843	0.522136	1.17529	0.642558	0.640309	0.753339	2.60953	1.50869	1.37456	0.779477	1.04094	1.34266	1.45596	1.51063	0.9477	0.391562	0.598739	0	0.949085	0.816154	0.942298	0.333295	0.527286	0.784697	0.860925	1.00816	0.763133	0.618043	0.76124	0.619878
Pita_unigene6066	1.1749	2.13877	18.1468	3.27778	12.1567	4.02379	1.26256	1.84775	1.29592	2.37898	2.10957	0.248139	0.84764	1.9659	5.60519	2.356	0.476258	3.1467	0.263104	0.278313	0.263817	0.258718	0.890335	0.282094	3.77178	0.214233	0.372831	0.0804542	1.41425	1.10158	0.158141	0.0835397	0.352907	0.0388532	0.0778151	0.111877	1.23461	0.551401	1.02125	0.103742	0.26292	1.87476	0.96972	0.511447	0.920216	0.468358	1.62561	0.830206
Pita_unigene60659	0.526533	1.16523	0.495159	0.851425	0.487604	0.6405	1.47364	1.07373	0.746583	1.42024	0.620627	1.0567	0.758899	0.864928	0.942231	0.911325	0.15152	0.482009	1.36511	0.191414	0.639525	0.795021	0.632343	1.23424	0.350522	0.77977	0.565674	0.206713	0.306561	0.270659	0.46115	0.319528	0.618266	0.271948	0.359479	0.130683	0.481551	0.796207	0.230806	0.590273	0.300473	0.265733	0.964688	0.71517	0.830006	0.768658	0.331392	0.506157
Pita_unigene60625	3.42854	3.10637	4.093	1.93236	0.315265	0.970125	0.971579	1.13007	0.442638	0.109433	0.416686	0.936174	0.101342	0.376456	0.842823	0.484684	1.04329	1.29293	1.12524	0.508332	0.428097	0.572772	1.79957	2.40235	0.125706	0.666646	0.340145	0.0635536	0.0990737	0.723932	0.0526286	0.286412	0.0592435	0	0	0	0	0.18037	0.111223	0	0	0.112467	1.12918	2.11516	1.83628	0.527634	0.828727	0.289566
Pita_unigene60605	0.159257	0.404552	0.734048	0.0365812	0.298683	0	0	1.02941	0	0	0.190767	0	0.0826323	0.903302	0.0845643	0	0.161085	0	0	0.583134	0.232244	0.152646	0.39233	0.0182143	0.299734	0.423845	0.561324	0.0916069	0.605109	0.776508	0.53792	0.300887	0.333432	0.44781	0.269655	0.757666	0.0926443	0	0.704208	0.180277	0.580918	0.445468	0.0926461	0.0288699	0.408584	0.29051	0.362123	0.549117
Pita_unigene60585	1.65681	1.15318	2.86483	0.621473	3.8897	1.06759	0.359082	0.239254	0.309282	0.463283	1.26192	0.411038	0.562014	0.464885	0.916852	1.10214	0.870236	0.765242	0.25501	0.728823	0.284733	1.44864	0.291933	0.625651	0.501991	0.337126	1.96606	0.116729	0.0981127	0.25326	0.428828	0.104463	1.02261	0.0648283	0.0331672	0.0621422	0.225254	0.218074	2.1788	0.999991	0.0939485	0.154262	0.662529	0.796727	1.90093	1.25579	0.107672	0.529807
Pita_unigene6057	11.3103	17.1238	10.6157	2.51159	2.95317	7.97152	14.3259	9.82813	27.0037	8.25659	5.88036	16.4408	6.71946	8.17466	22.1316	7.0797	11.9836	14.6157	5.37733	5.31296	21.5673	3.39775	7.07949	9.52092	6.29814	3.67343	6.00333	1.86006	3.50807	2.64973	2.55563	3.83083	6.05905	0.631849	1.38107	1.63937	3.10727	3.38031	5.94348	0.986382	1.04385	3.37788	6.97742	4.74467	4.0934	3.20544	3.59659	5.01936
Pita_unigene60563	0.43318	0.575552	0.331978	0.399217	1.06032	0.142138	0.0227539	0.119352	0.106965	0	0.162367	0	0.0457858	0.10421	1.12513	0.166059	0	0.0451731	0.0446679	0	0	0.027727	0.322318	0	0.168293	0.228559	0.0664804	0	0	0.0901847	0.0297484	0.0248092	0	0	0.0231284	0.0221199	0	0	0	0	0	0	0.138271	0.140002	0.308736	0.0644386	0.671645	0
Pita_unigene60560	0.682155	0.127269	0.4378	0	1.18255	0.882588	1.54483	0.107534	0.654996	0.345632	1.27615	0.575317	0.253064	0.184733	0.72467	0.90156	0.619836	1.61581	0.866715	0.0656196	0.349823	0	1.11139	0.454175	0.336236	1.22686	0.411064	0	0.8197	0.206331	0.125893	0.376226	0	0	0.240014	0.160062	0.10074	1.08624	0.608096	0.545085	0.324459	0.282482	0.153436	0.616907	0.347166	0	0.629781	0.271034
Pita_unigene60489	0.627387	0.663213	1.08265	1.20099	2.2082	0.700918	0.62574	0.215656	1.0621	0.960055	0.485722	0.776079	0.668271	0.117082	2.28249	0.289058	0.319613	1.098	0.462445	0	0.24343	0.266397	1.27782	0.396931	0.268027	0.707418	0.499238	0.100309	1.19551	0.190414	0.265558	0.2981	0.189143	0	0	0.117895	0.333572	0.316249	0.45868	0	0.246806	0.708305	0.565611	0.418781	0.91294	0.0675665	1.65942	0.525295
Pita_unigene60473	8.24445	15.6009	9.83721	10.981	13.0307	12.2577	11.6255	5.40453	12.4659	10.0868	11.9215	12.1846	9.79938	4.66386	12.7595	12.5285	8.6035	11.5578	9.49989	4.54083	15.2098	8.39721	7.76091	9.14476	9.76236	5.88508	13.4003	3.23275	6.49285	4.74358	4.14248	4.01026	4.53102	4.52022	2.67392	3.3448	7.75196	7.67392	11.482	8.87838	6.78949	6.58038	15.5982	7.32199	13.9452	12.0103	8.99571	9.43418
Pita_unigene60467	0	0.615661	0.734026	0.631729	0	0	2.97547	0.319986	0.416314	2.82441	0.742432	0.642176	0.430716	0.566806	8.80582e-08	0.290109	7.14627	0.267709	0	0.603279	1.05444	0.578424	0.571178	0.282187	0	0	0.250973	0	0	0	0	0.759611	0	0	0.467701	0.519748	0.447248	0.654471	0	0	0	1.94306	0	0	0	1.34396	0.376158	0
Pita_unigene60457	4.70648	4.25809	4.49271	3.69437	2.98853	7.30686	2.19102	3.78096	3.37655	2.88711	1.79561	3.24822	2.78011	4.04145	3.61729	3.43149	4.39399	2.99222	2.4705	4.30067	3.28374	3.98854	2.63749	3.71061	9.20213	6.73783	3.81069	16.0954	7.88993	6.70425	10.5164	9.96744	6.62907	9.65306	8.99029	9.24455	5.40636	4.31055	4.0886	4.88035	3.54031	3.66513	4.73963	2.55734	2.91044	2.87998	3.43398	4.0147
Pita_unigene60421	2.01504	4.57892	2.85148	2.14431	4.58721	1.21853	2.53513	5.17248	3.44205	1.85967	4.13644	1.42359	3.04589	4.52339	18.7824	4.53205	1.03811	3.47423	0.718852	1.97925	3.89162	2.30836	3.74878	2.65274	10.4186	4.2685	1.28325	15.8348	16.7251	7.85199	21.4996	16.6745	6.08056	23.2608	22.5654	5.56987	23.1571	9.66484	4.99938	17.9452	12.4999	8.90101	3.66014	2.96331	2.65455	4.39989	5.6441	1.97059
Pita_unigene60415	2.42021	1.70254	0.936208	6.74874	4.97021	2.1214	3.29985	0.633655	2.2637	5.88375	3.58946	1.39425	6.02799	2.19532	2.31745	3.8986	0.876299	4.3203	5.88678	0.898599	1.46859	4.25491	6.02752	1.12393	22.733	2.77075	4.98435	109.733	14.4941	9.80332	47.9044	14.55	12.9161	104.878	27.7475	26.6842	12.9543	2.42148	3.19616	17.4462	10.3683	6.71483	5.49577	1.64749	3.65295	7.97915	4.32615	4.51438
Pita_unigene60410	7.52054	0.494908	0.217492	0.245195	0.277831	0.931229	0.670836	1.40747	1.28242	2.4859	1.20808	1.59409	2.85716	0.266258	0.489064	1.37545	1.6956	0.355164	1.25104	2.2019	0.660402	4.57762	3.5522	1.99714	1.88816	4.86623	1.61153	13.4543	3.81934	12.8726	9.62051	15.8959	3.42087	14.7004	4.61399	14.1723	13.0775	11.0047	18.5623	18.3954	8.44349	13.9432	1.67587	1.23819	3.33733	3.54651	2.44693	2.31755
Pita_unigene60408	0.196895	0.09808	0.0603616	0.170156	0.501921	0.0798302	0.155036	0.13017	0.320807	0.279702	0.171516	0.201034	0.374547	0.14214	0.2654	0.582236	0.0552235	0.276757	0.334942	0	0.183213	0.17969	0.0627463	0.0285651	1.01861	2.52231	0.543739	0.521736	1.74717	0.547331	1.149	2.22945	0.2857	1.06573	2.26196	0.573533	0.562807	1.82429	0.132386	0.560282	1.94733	0.348405	1.87616	1.43298	0.421154	0.438484	1.11684	0.0917817
Pita_unigene60382	0.75056	0	2.57233	0.649137	5.30569	0.98272	0.943524	0	0	0.145604	0.301739	0.127615	0.118921	0	0.56104	0.739669	0	0.874495	0	0	0	0.227993	0.51611	0	0.484927	0.132687	0	0	0.0545623	0	0.121741	0	0	0	0	0	0.147185	0.141755	0	0	0	0.0600975	0	0	0	0	0.125253	0.406765
Pita_unigene60380	40.0684	45.1151	49.0591	46.526	34.4235	54.6508	32.4261	20.2546	49.4522	25.4965	43.0618	34.823	39.0365	19.6646	33.3073	39.4183	53.2045	35.3321	30.1789	16.3768	37.2688	27.7472	22.7393	32.5259	9.06834	13.8951	13.8044	8.11057	2.60028	7.79907	1.32104	2.20944	3.43213	4.39708	2.35621	1.6481	9.58733	8.17281	8.0438	13.2255	6.46902	18.2366	33.1936	23.5177	21.3122	42.6073	21.353	26.3622
Pita_unigene60365	0.889345	0.781762	0.241869	0.465644	1.44601	0.858722	1.44766	1.30802	0	1.15158	0	0	0.959488	1.80338	0.985947	0.0490733	4.37155	0.158669	0	0.802672	1.05372	0.0403722	0.299466	1.03802	0.580841	0.877959	1.31241	0.163669	0.317346	1.21167	1.1366	0.00796448	1.9073	0.325162	0	0.521108	0	0	0	0.225665	0	0.705402	0.755549	0	0.333483	0.253478	0.858736	0.622037
Pita_unigene60357	0.603677	4.6819	3.15621	0.329336	1.78099	1.71936	1.25235	2.0938	4.44622	0.629012	2.50441	1.84766	0.688692	4.39504	5.08643	1.78478	5.29411	2.30123	0.304951	2.24392	3.2478	1.13915	1.38225	2.15017	5.26536	1.60034	4.73104	1.8545	2.58051	1.85791	3.87407	1.36942	2.76449	1.27097	1.62183	1.78125	4.23538	4.51534	4.43622	2.36376	2.29389	2.48105	12.3051	3.93493	5.6684	8.28411	9.18315	3.87085
Pita_unigene60352	3.36136	2.39556	6.80648	2.87182	2.97412	1.63703	5.78628	11.0885	2.77798	2.45032	8.2416	2.76188	1.83014	7.56314	1.72702	3.08288	2.0595	3.14144	2.45471	4.13906	2.2369	4.22176	3.84545	1.09921	1.39933	2.73453	2.37197	0.715392	3.09288	9.69148	0.409942	1.05451	1.50861	0.230287	1.26988	6.2681	0.915391	1.15901	2.12161	2.10447	1.50537	7.17009	0.287918	1.75255	1.29849	1.79832	2.53038	5.59058
Pita_unigene60347	0	1.02975	0.737515	0.997865	0.618002	0.502491	0	1.08285	2.08738	1.57531	3.70924	0.431944	1.10463	1.64052	1.07266	2.22038	1.12388	0	0.817746	0.236156	0.448574	0.525652	0	0.323538	2.75543	0.126609	0.927244	0.250615	1.15531	0.337982	5.33708	0.334818	1.67808	0.461442	0.889917	1.01663	6.43742	0.273489	2.80501	0.514135	1.1017	1.32009	5.89701	1.16454	0.60291	3.56044	1.81696	0.609772
Pita_unigene60292	0.988883	1.09109	6.67405	2.09431	6.60225	3.25291	0.19134	4.80831	0.812649	1.89611	1.94462	1.21278	1.19816	3.2621	6.51948	2.92442	0.917889	0.202998	1.82056	8.67198	1.56777	1.33499	1.46528	1.49737	2.27903	0.421559	2.25701	4.29937	3.5434	0.453905	1.64133	2.46562	5.42525	2.66107	2.33493	0.687429	9.88307	5.90372	28.3219	3.82719	10.571	8.43335	1.01979	3.53367	14.7728	2.89269	17.0117	1.03901
Pita_unigene60290	1.22897	0.514013	1.8205	0.494068	1.14884	1.65438	1.89555	1.02221	0.44971	0.553271	1.86282	1.42932	0.822344	1.31806	1.20384	1.09024	1.50157	2.2498	0.568979	1.36555	0.219104	0.79397	0.844098	0.53621	0.0681422	1.11373	0.583042	0.402506	0.566229	0.96137	0.373722	0.0633796	0.813561	0.0555627	0.414756	0.221038	0.568479	0.876068	0.713196	0.449736	0.577207	0.474701	0.46811	0.381404	0.380585	0.816268	1.03048	0.759834
Pita_unigene60249	22.9117	32.7619	38.9266	25.1047	35.3345	22.4609	39.0273	35.6424	51.765	36.5754	45.2601	29.8782	33.1485	37.6312	56.4561	42.6972	26.9347	36.5483	32.3144	23.6751	47.1435	33.9105	35.0221	27.1992	25.0562	24.3969	18.997	4.38019	16.0615	36.2506	13.66	12.3694	13.9508	2.26642	10.3482	20.7048	29.9429	35.5933	27.1142	14.5628	28.4039	64.033	56.6448	37.6559	36.4212	31.5253	35.8919	62.2092
Pita_unigene60237	0.725009	0.916919	0.551768	1.02285	0.487527	0.643861	0.754611	0.90134	0.382066	1.06931	0.555951	0.737347	1.05051	0.791193	0.801568	0.744724	1.25397	1.29911	0.579625	0.944708	0.661443	0.528449	0.818335	0.674739	1.75646	0.916851	12.8087	0.643342	13.3412	9.91308	0.907135	0.661892	13.2431	0.783068	19.5334	11.2126	1.33557	0.964115	16.8709	1.39511	17.4301	11.5612	0.828924	0.510813	9.54301	0.572068	9.98668	8.30944
Pita_unigene6022	0.139043	0.237552	0	0.164735	0.174834	0.0391164	0.281797	0.0197042	0.123616	0.0940474	0.133999	0.0608647	0.0377935	0.120402	0.178635	0.411199	0.134174	0.410446	0.147485	0.0389225	0.166424	0.199529	0.0570258	0.0345876	0.815055	0.900814	0.347576	0.454553	0.294797	0.223266	0.952209	0.573344	0.259168	0.420002	0.400961	0.182506	0.644046	0.518579	0.300626	0.390103	0.276317	0.153675	0.513594	0.442789	0.156787	0.425893	0.219555	0.0927321
Pita_unigene60211	7.35523	3.76564	23.3949	4.06968	9.20651	4.11968	2.25315	21.5668	15.7623	12.582	22.3075	3.97797	5.97308	2.59373	12.7256	16.3631	3.06079	3.08048	5.23364	14.1667	2.81378	28.9778	21.046	7.06086	13.0863	9.76231	16.5677	15.8367	3.9587	10.2162	68.4961	16.6041	4.42821	17.1394	5.83815	31.9731	16.2363	26.3244	63.839	17.0016	5.66105	24.5662	10.467	8.37574	41.8385	11.508	66.3209	10.5208
Pita_unigene60190	0.218622	1.36048	1.96068	0.340273	0.485643	0.48328	0.721843	0.65004	0.582525	0.362388	3.05792	0.334619	0.207862	1.51617	0.343344	1.18504	0.640066	0.357113	0.202766	0.590672	0.457357	0.39861	0.0521665	0.142678	0.605497	0.0579119	0.0502703	0.541925	0	0.0512791	0.745394	0.112709	0.0595694	1.51776	0	0	4.52385	0.619546	0.330497	1.30588	0.506592	1.26187	4.02862	1.11604	0.108016	2.22871	0.109523	0.864021
Pita_unigene60188	0.382545	0.523822	0.351861	0.496086	0.23561	0	0.406195	0.474016	0.297354	0.86053	1.01461	0.439223	1.00034	0.248664	0.343448	1.03684	0.440802	0.0893773	0.754056	0.375635	0.266827	0.610506	0.0456641	0.166457	0.264929	0.253104	0.835863	0.0474452	0.125175	0.0896992	0.233105	0	1.19813	0.0916449	0	0.0440438	0.0455146	0	0.674841	0.122428	0	0	0.0457782	0	0.614089	0	0.143814	0.0890043
Pita_unigene60174	1.23295	5.35078	2.72625	3.52694	4.88582	2.02416	0.552791	2.18352	2.22595	1.99276	2.95667	2.26065	2.90712	2.01428	5.15163	3.79162	2.16458	0.44005	1.92906	1.37606	3.15888	1.82357	0.28546	1.91095	1.37418	4.793	1.52689	0.326769	0.856266	6.54785	0.378326	1.83997	0.785138	0.417518	0.470471	0.809687	0.215845	2.66966	1.29729	0.470741	0.328093	3.50415	0.732263	3.00095	1.61321	0.781061	0.966757	3.99259
Pita_unigene60148	0.0543273	0.0874135	0.120181	0.0339275	0.0305891	0.363792	0.163179	0.179445	0.110085	0	0.0959129	0.239721	0.0304615	0	0.131363	0.0336255	0	0.171339	0.0963287	0.125501	0.083092	0.0578606	0.148699	0.0842881	0.359008	0.395783	0.0725988	0.48463	0.304113	0.374698	0.216148	0.25831	0.0824781	0.205421	0.0386451	0	0.41282	0.173863	0.130074	0.346915	0.140879	0.336577	0.179046	0.184722	0	0.214571	0	0.474749
Pita_unigene6011	0.366159	0	0.417326	0.283247	0.698398	0	0	2.03622	0	0.47345	4.80193	0	0.932175	5.95128	1.41288	0.66979	0.364294	0.205676	0.628877	2.64836	0.629222	3.00503	0	1.99156	1.11451	1.6465	0.207635	8.78175	1.96176	0	4.26567	3.38815	2.50471	16.161	14.5765	6.76928	0.301532	6.13632	0.292498	2.90582	1.51713	1.06589	0.262086	6.26155	0.547145	6.25401	0.67324	1.13758
Pita_unigene6010	2.55127	2.25369	4.43579	5.30731	6.15861	4.15812	2.12733	8.83403	2.88938	5.78144	4.93612	4.90625	8.07886	14.4223	4.05242	3.77116	3.131	2.34648	12.7355	22.2996	9.4636	11.7133	4.84228	8.50187	25.857	12.9188	3.2505	75.6923	9.26804	3.204	35.6731	31.2957	15.071	95.3703	52.8671	32.2538	10.3227	18.2549	3.84873	22.5897	14.178	4.17517	6.10076	11.2485	5.48018	13.5722	5.78531	7.31163
Pita_unigene60097	1.23513	1.03511	0.681468	0.641715	1.38451	1.21733	1.32093	0.512376	1.56361	0.957098	0.8504	0.372258	0.775127	0.561688	2.33376	0.792508	0.496199	1.46168	0.279788	0.197006	0.701537	0.229371	0.825666	0.153105	0.557164	0.86135	0.588099	0.166583	0.19542	0.376623	0.580903	0.207204	0.628524	0.120668	0.386312	0.427347	0.287409	0.565322	0.405524	0.128705	0.122528	0.460635	0.34522	1.02042	0.633169	0.620627	0.583074	0.609541
Pita_unigene60071	277.879	142.186	129.774	70.6281	87.9087	58.3563	217.574	189.397	219.639	157.912	183.372	115.914	118.698	119.455	127.735	226.087	128.707	231.322	194.779	167.847	178.688	234.673	201.39	109.747	48.7816	64.7323	133.12	11.3294	26.1653	52.0861	51.6128	54.5405	123.411	15.4649	32.53	45.9438	30.6012	65.6895	75.8662	28.2408	20.7213	36.7046	156.362	188.155	159.439	137.231	110.134	161.42
Pita_unigene60064	2.25423	2.91078	63.1476	2.18254	34.532	2.11127	0.983997	51.5136	2.66223	2.68888	31.242	5.34646	3.28201	58.4787	2.29443	33.0776	2.97297	3.804	2.49967	64.7381	0.666183	34.8865	2.49186	2.83354	37.0898	32.1054	36.4274	44.4862	28.3414	80.052	36.7611	36.508	38.6563	37.4045	26.2333	91.2379	45.7156	39.6547	38.0505	35.8658	35.0122	88.699	39.4155	29.7073	37.6486	35.1894	28.6103	83.4678
Pita_unigene60061	2.41483	1.63708	4.62788	5.97283	12.094	5.17232	3.93371	2.37193	2.73404	5.80816	3.72971	3.1037	4.37454	1.82163	4.93052	4.46514	4.15065	5.42293	2.33959	0.553863	1.90461	1.97124	3.13509	3.00047	2.51146	4.91554	1.92137	0.320307	3.33832	1.30733	2.04778	1.68604	0.786034	0.194303	1.58912	0.218333	2.02282	4.97843	2.23004	0.293467	2.32932	1.16945	2.39415	2.60324	1.20454	0.562904	4.12795	0.855308
Pita_unigene60041	1.0366	0.540711	0.681046	0.512122	0.291982	2.9593	1.39754	0.929671	2.89401	7.4806	7.66513	3.27443	4.55285	0.598978	1.59526	1.94601	2.39827	2.02922	0.274721	1.89057	0.918088	0.720193	2.02671	0.902091	24.2841	1.56798	2.85211	159.547	45.1814	6.52843	87.2362	32.42	20.2214	315.192	128.696	59.0226	73.7993	7.33152	48.6619	44.2121	40.9978	11.1205	0.189021	0	0.877787	0.876185	6.9271	0.137792
Pita_unigene60002	3.70145	3.39423	6.56151	3.22608	2.18133	3.11502	6.16127	3.24552	4.64909	5.81671	3.38688	4.71117	4.10774	1.90496	3.1345	6.37192	5.04091	6.99482	8.886	4.02294	3.34513	4.70119	5.46441	4.24968	1.33828	1.69888	3.01289	0.106674	0.655571	1.20633	0.498148	0.635982	1.48806	0.0772805	0.360842	0.813764	0.511332	1.15663	1.0011	0.0229	0.0994877	0.621879	1.84925	5.64484	4.47383	3.27774	1.67006	7.50705
Pita_unigene59984	2.3306	3.19736	3.03864	1.91891	2.57222	1.62317	3.38882	1.77856	2.76134	1.78488	3.351	2.23406	2.28592	1.20969	4.61338	4.57117	1.67953	3.03594	0.765529	0.879791	1.96358	1.53621	1.68011	0.780618	2.49663	3.37837	2.17555	0.178177	1.63336	3.69839	1.3674	2.14508	1.14778	0.206517	1.24048	0.561117	1.20177	1.30221	1.37469	0.459331	0.532159	0.603338	2.91952	1.57239	1.40625	3.43168	1.98277	1.43758
Pita_unigene59967	2.97345	1.17933	0.893443	0	0.763358	0.582218	0.279572	0.482193	1.05202	2.13733	1.42684	1.48954	3.41303	0	3.06219	2.86482	2.20769	0.45776	0	1.08891	0.516304	2.93681	0.990041	0.419949	5.167	1.48611	1.43012	14.1814	11.4104	1.63004	17.1625	5.57986	4.32988	42.214	13.8231	2.94613	34.0781	4.40646	36.524	16.5916	8.2322	5.18362	1.45232	0.470013	1.20549	3.58887	3.60873	0.413691
Pita_unigene59937	0.35095	0	0.180294	0.16409	0.62652	0.310789	0.05175	0.288895	0.145248	0.103831	0.817362	0.478017	0.0501227	0.0950104	0.34455	0.270245	0.0727459	0.15418	0.0508391	0.207134	0	0.728102	0.710684	0	0.121569	0.0581044	0.440873	0.0543717	0.0956246	0.148364	0.427365	0.0565682	0.079186	0.656361	0.269804	0.303329	0.523912	0.696663	1.74751	4.8039	0.733492	1.29975	0.0504639	0	0.260434	0.356659	0.708002	0.0808393
Pita_unigene59905	0.391281	0.226372	0.204505	0.208087	0.166971	0.214182	0.210462	0.101776	0.24035	0.132386	0.12462	0.178301	0.27363	0.0164351	0.349241	0.0860218	0.294336	0.138303	0.0621177	0.0506249	0.0628698	0.0928133	0.0823556	0.0886805	0.148388	0.223213	0.107123	0.324843	0.222029	0.548977	0.581622	0.317519	0.138188	0.368853	0.199966	0.232094	0.930095	0.261559	0.659701	1.16708	0.425865	0.571922	0.0948148	0.0500661	0.134291	0.156301	0.0489584	0.103867
Pita_unigene5990	3.53455	4.36586	2.64823	3.41756	2.94078	3.09945	5.37781	3.77145	2.80524	3.48566	1.64971	2.84423	2.90688	2.14963	3.76481	2.25242	2.62858	2.88625	3.60754	2.04017	2.17145	1.5426	1.85844	1.38568	1.79375	3.28979	1.10667	0.252579	1.49095	1.21471	0.495089	1.31663	0.167804	0.057612	0.541066	0.215486	1.03406	2.80481	0.580172	0.226686	0.512349	1.51594	2.58716	2.70211	0.838268	1.77155	1.10222	1.42666
Pita_unigene59884	0.170239	0.378386	0.566803	0	0.557836	0.805296	0.268487	0.172342	0	0	0.197914	0	0	0.889074	0	0	0.282898	0.633492	0	1.15793	0.11403	0	0	0.146973	1.4977	0.984662	0.699171	10.3007	3.47707	0.153379	2.79879	3.65993	1.55646	5.08955	8.43397	3.5211	0.286025	0.265929	0.45628	0.284909	1.23036	0.548958	0.210045	0	0	0.155304	0.107882	0
Pita_unigene59829	16.464	30.2839	26.0994	26.1111	23.9734	28.1242	11.289	11.1252	27.3487	18.136	9.25601	12.8919	31.429	13.501	30.8018	14.1492	17.2932	13.7232	19.4458	12.3278	30.9511	15.1122	14.0008	8.73466	5.51378	11.6493	12.4658	1.75592	9.18702	15.4502	1.8719	5.63152	5.22835	1.8548	3.88304	6.38287	7.19454	17.8028	17.3114	0.50779	6.54515	24.9705	8.89906	9.05872	16.8175	7.25883	14.4412	15.2682
Pita_unigene59825	4.04751	5.32492	0.213899	0.36396	0.590797	0.178408	4.47396	0.323523	2.97368	0.196329	0.470268	0.205666	0.265279	0.0397728	4.46679	0.503805	0.105246	3.22096	0.353136	0.089598	4.24206	0.250773	3.56367	0.239774	0.154463	0.255967	0.404441	0	0	0	0.226245	0.404982	0.350007	0.0860918	0.0942606	0	0.251754	0	0.441502	0.116249	0	0	0.422125	0.350086	0.619397	0.274552	0.222736	0
Pita_unigene59815	7.12535	5.30828	4.33622	3.33232	3.57701	3.55498	11.3628	3.72442	7.2694	5.09875	6.90708	7.64695	5.6398	3.96004	6.20926	8.98551	9.58352	10.4958	3.78327	1.9748	5.26856	5.04478	6.20348	4.10815	3.11906	6.66008	5.24561	1.89266	1.991	3.75361	2.76538	3.97205	2.55471	0.808752	2.32922	2.29389	2.41045	6.06774	4.91935	2.31706	2.21175	3.98195	6.75949	7.87462	5.6772	3.46089	4.01379	3.70773
Pita_unigene59813	3.47579	4.46499	14.2811	13.4138	23.4499	9.32211	10.5644	2.67683	2.20196	7.26127	1.43314	3.50298	6.78747	2.46562	21.0816	11.5288	3.53098	18.4376	2.57131	1.90053	4.2116	6.17955	5.58258	2.89474	4.28745	5.24604	7.76747	2.12888	2.42358	1.59784	2.07753	2.77495	1.04415	0.703086	0.467084	1.32459	1.58799	4.21002	1.09161	0.383339	0.625043	1.54674	5.2292	5.6585	2.47341	1.68692	2.17138	5.4984
Pita_unigene59802	5.78546	2.92185	2.86581	4.96361	4.25386	4.02307	3.81322	0.999595	0.852009	4.02383	4.46523	4.88734	5.39975	1.33541	6.38471	1.45985	4.18999	3.95572	4.07605	1.57919	1.34074	1.76281	2.7933	0.69704	3.02075	2.84206	2.1377	1.56727	1.1332	0	0.307093	1.18689	2.75567	0	0	0.932907	0.433438	2.16516	2.17894	1.79882	0.38958	0.972882	1.00145	0.447561	3.07873	2.05024e-09	2.78949	1.76298
Pita_unigene59787	1.18223	0.446023	0.751819	0.658146	1.094	1.63497	2.58044	0.335415	0.445889	0.491446	0.564302	0.99916	0.417455	0.225021	1.16364	0.799804	0.816078	1.94314	0.475123	0.101349	0.495356	0.282003	0.727868	0.841169	0.676129	0.186474	0.134404	0.0798429	0.383918	0.116622	0.342184	0.133819	0.11315	0.0472494	0.27165	0.0908572	0.161146	0.143361	0.133581	0.0878798	0.298789	0.394695	0.132221	0.330972	0.212005	0.192103	0.400956	0.13182
Pita_unigene59773	28.4378	47.0322	93.3025	47.0679	40.9216	37.8165	31.808	33.0644	71.3688	26.8597	26.4115	27.3021	35.178	43.6623	59.3208	41.6235	43.5001	59.8512	19.2638	30.0597	45.9842	19.0997	26.2271	21.3968	13.4148	20.929	22.4595	4.31829	15.0867	22.6955	8.71741	15.1357	22.668	2.75815	9.39731	15.6	12.2471	19.639	23.5141	4.40628	6.16096	30.0411	21.9698	30.7526	34.8603	33.0795	36.1032	46.1062
Pita_unigene59771	2.1268	0.974418	0.938949	1.32368	1.21384	1.25468	1.32538	3.16284	2.68326	1.36974	2.21499	2.12749	1.86074	2.24845	2.10105	3.899	2.07042	1.83033	1.73627	2.33801	1.74092	2.25043	1.34099	1.2587	4.05408	2.15987	1.5265	9.58541	2.26429	5.42442	5.76824	6.62214	6.06813	20.5958	6.3311	8.26286	13.892	4.43805	9.13469	28.4269	9.22743	9.38771	2.28054	1.48729	1.34432	3.66745	0.853229	1.8221
Pita_unigene59713	0.141635	2.69622	0.500465	0	0.244287	0.0794602	0.568664	0.0795962	2.68067	0	0	0	0.0870006	0.27398	3.54175	0	0.11909	0.298485	0	0.335566	2.31783	0	0.372299	0	2.07562	1.53435	1.6143	1.5213	1.45248	2.82124	2.58513	0.292043	4.77995	0.395197	1.29248	3.77909	0.999145	1.08208	5.0454	0.56481	0.886404	3.60171	0.668675	0	0.829545	0	0.353066	1.08976
Pita_unigene59689	0.406564	0.940484	3.8069	0.964166	1.86227	1.40304	0.835764	1.50745	1.99622	1.24234	0.259095	1.12977	0.763045	1.19683	3.9643	0.496304	0.780925	0.797653	0.446636	0.601948	0.271299	0.0451488	2.87884	0.591813	1.85584	0.275702	0.285172	0.677063	0.202818	0.756477	0.687682	0.479199	0.253014	0.631589	0.0372001	0.197371	3.08835	1.31665	4.08352	4.09391	0.825928	3.05777	0.703611	0.476156	1.25325	2.20596	3.06989	0.284716
Pita_unigene59665	1.69842	1.10162	1.8164	0.942265	1.24272	2.64133	0.708753	0.60973	0.350963	0.972615	0.495113	1.00802	0.262946	0.647325	0.886979	0.428243	0.497618	0.665427	0.403091	0.542626	1.06559	0.468452	0.377425	0.962588	1.09444	1.29477	1.19954	0.15689	0.448114	0.370314	0.269841	0.244334	0.215021	0.151533	0.379337	0.254477	2.52032	1.29919	2.27014	3.16913	1.02533	3.12214	0.378167	0.38352	0.897103	0.491851	0.594368	0.551923
Pita_unigene59649	3.80745	0.623758	0.29098	0.521237	0.0623955	0.681617	0.943219	0.374401	0.279454	2.50346	0.927702	2.29505	5.13327	0.661804	1.06343	0.249367	2.60692	3.2124	0.409256	0.430445	0.175083	0.693711	2.86578	3.08073	1.12662	0.595645	0.287936	1.30959	2.54109	1.47178	3.35816	3.62892	1.708	6.93806	6.82446	8.05633	7.53512	3.19169	7.11443	5.5664	9.67406	7.07464	0.846928	0.851818	1.11322	0.505683	2.12422	1.10145
Pita_unigene59636	0.399848	3.29786	0.551613	2.52592	10.466	9.90532	4.32291	2.04864	2.63551	2.65073	3.05176	5.06028	1.67968	4.83728	9.08917	6.15073	3.11163	7.26593	0.958439	5.8897	10.3726	10.3301	2.16611	4.33231	3.70383	1.97151	0.276046	2.98978	0.0581651	0.187384	2.25019	0.515284	0.217579	1.15126	0.0640198	0.582381	1.81999	2.2558	0.772916	1.42976	1.00466	4.46984	8.9138	2.0417	1.08555	1.27618	0.334446	4.86191
Pita_unigene59612	0.164808	0.0328383	0.303148	0	0.125656	0	0	0.0980603	0.0292936	5.23092e-06	0	0	0	0	0.284269	0.16245	0	0	0.183506	0	0.0306709	0	0.730421	0.0573837	0.0365401	0.0696486	0	0.0327528	0	0.0308935	0.0643904	0.101946	0.0358714	0.189815	0.0316654	0.0606406	0.219839	0.261769	0.498648	1.01298	0.183372	0.0954391	0	0	0	0.0293611	0.165426	0.0307292
Pita_unigene59544	3.69927	1.98679	4.39055	2.07179	5.96076	7.43203	3.18297	1.5425	1.90809	1.65605	3.94565	2.45733	1.51917	3.06115	4.04323	4.99406	5.70961	5.43002	0.589978	2.17683	1.35642	1.79656	2.36144	2.60206	1.76252	2.51849	0.62627	0.343754	0.374139	0.665862	0.82403	1.62441	0.27859	0.160873	0.0828515	0.159947	2.40173	2.65975	0.406231	1.52928	0.582966	1.57673	1.36618	3.01006	1.24177	1.45537	1.83717	1.09115
Pita_unigene5954	2.08046	3.56889	9.15672	1.72065	2.16904	7.03481	1.77086	10.5161	2.87286	2.50213	2.36963	7.79004	0.650347	8.22583	1.4379	1.64359	4.83678	1.57827	1.06605	6.74713	1.14701	1.67937	1.03107	6.94855	7.77272	6.84406	3.12455	19.6777	11.1124	16.4	10.0348	24.8347	11.82	15.3739	45.9518	54.0699	0.880046	1.31884	1.53931	2.5544	1.95997	6.48704	2.26548	2.4605	1.38358	1.18638	3.83843	6.01708
Pita_unigene59535	1.10805	0.264197	0.436706	0.574059	0.528828	0.332433	0.47905	0.239055	0.235698	0.478888	0.440808	0.344639	0.458437	0.312669	0.151799	0.926143	0.143109	0.609339	0.559089	0.235634	0.157073	0.635638	0.738672	0.251726	0.291952	0.152026	0.355174	0.0480245	0.0420678	0.067631	0.259835	0.223466	0.287741	0.0927982	0.0926938	0.110463	0.253051	0.186053	0.437698	0.205747	0.0670311	0.116809	0.184586	0.0466157	0.498757	0.129668	0.0969689	0.202866
Pita_unigene59528	0.274935	0	5.6928	0.0967354	0.0457681	5.48672	0.318477	8.69227	0.0440791	0.0918302	0.276251	5.95335	0.0443113	7.25796	0.168416	0.0463138	6.72327	0.181164	0.0863739	6.6797	0.218963	0.17309	0	5.38774	7.22535	7.30045	4.76182	11.8538	2.66318	2.59765	10.8479	8.74974	7.51366	12.7248	4.48848	3.72173	10.3142	8.8923	7.79109	12.8302	4.3364	4.28636	4.79462	5.04118	4.87175	7.27818	3.16188	2.67421
Pita_unigene59500	266.644	336.058	392.77	101.467	251.625	382.248	103.441	240.817	528.239	77.6312	282.74	191.396	91.1514	421.863	485.66	311.415	348.897	206.079	51.4127	140.399	381.552	182.194	125.73	185.447	107.56	135.087	119.203	18.8789	74.5653	75.6597	73.6204	85.2987	169.451	7.45562	26.2841	45.4567	59.8291	118.517	134.508	11.0294	8.08159	109.761	268.906	198.511	219.704	174.276	147.861	197.727
Pita_unigene59482	0.876315	2.01208	2.00326	1.12084	2.3079	1.8988	0.884281	0.794916	1.18734	0.618498	1.71703	0.917181	0.368731	0.957059	3.09954	1.8953	0.849985	1.82593	0.281978	0.553056	1.10506	0.29806	0.425819	0.310107	1.71146	1.59887	0.519272	0.179454	0.699628	0.667668	1.13707	1.13237	0.613696	0.0570047	0.757799	0.518695	1.07507	1.68421	1.86031	0.104568	0.280734	0.745322	1.84768	4.21909	1.23072	0.635112	4.47087	0.941338
Pita_unigene59481	2.94054	1.86742	1.00782	1.10592	2.20355	4.19791	0.80887	0.849769	0.571134	1.16738	0.930396	1.14826	1.987	1.43997	1.53893	1.35447	1.21058	0.700372	0.347899	1.31603	0.697538	1.02591	0.409192	0.652803	3.28038	3.2159	1.88699	4.72918	1.53063	1.15626	4.69859	3.59128	2.04395	4.61855	7.25167	6.98466	1.66735	4.61478	3.11008	2.05767	1.5397	1.52704	0.307774	0.573086	0.635374	0.332588	1.21635	0.299014
Pita_unigene59480	2.28193	3.30054	24.5318	25.9787	24.5731	5.30518	1.99885	25.7192	2.71797	22.3512	17.767	5.26279	29.1003	27.0406	3.84259	15.6377	5.43678	2.50798	19.8741	24.6268	5.1111	14.9056	2.3448	4.40207	26.7336	44.5557	23.9865	15.614	28.0335	23.4702	32.9027	64.0363	33.5084	16.954	33.2038	23.6036	39.481	55.6418	37.8294	19.3143	38.6563	28.4359	24.3436	32.4145	20.3403	18.396	26.2727	12.4565
Pita_unigene59478	6.27774	5.66814	4.64889	4.58168	15.5411	18.3481	6.47498	2.47834	3.30778	4.48486	3.48961	7.22032	6.67709	7.60938	5.58654	13.8422	8.28069	9.33826	4.14491	11.6546	4.20477	9.65228	5.63703	8.24052	21.8082	12.3428	9.49346	20.9978	31.1927	16.1712	17.3129	11.1903	10.784	15.2346	30.944	17.8452	20.2479	16.4042	11.85	9.80613	33.4338	24.7761	11.5608	4.70685	5.3619	2.35881	4.53141	6.23458
Pita_unigene59474	0	0	0	0	0.135651	0.0339763	0	0	0.0306935	0.379227	0.0332987	0	0.279436	0.0299218	0.1862	0.0340438	0	0	0	0.255759	0	0.157587	0	0	0.25483	0	0.413285	1.64446	0.0904338	0.0323738	0.824741	0.213647	0.150366	18.1407	1.16122	0.0635502	1.51067	0.0391819	1.28877	2.13876	0.511851	0.299942	0.0992098	0	0.272795	0.215283	4.47156	0.0321932
Pita_unigene59465	5.04159	9.65167	14.9839	4.73253	5.21807	3.36633	16.6568	43.7193	23.8351	16.0269	39.8999	6.72887	6.38515	31.1454	23.5558	17.2194	3.16424	11.9673	4.11925	10.0271	6.5694	7.35982	10.5963	2.19774	113.158	70.7211	31.6174	137.759	103.866	31.8798	280.19	277.566	121.311	225.811	442.284	126.143	42.2994	50.0758	20.3139	43.8409	40.2814	28.8705	16.2476	22.176	9.203	12.7298	46.6761	16.6807
Pita_unigene59426	1.19989	4.82035	2.98823	0.636105	2.8493	2.5329	0.924698	2.94955	5.90879	3.94806	1.4784	2.68883	0.907056	3.41136	5.81207	2.35576	2.27339	2.11432	0.568401	3.01252	2.70948	3.51913	3.56682	1.75988	4.61648	4.48518	0.832601	10.7207	5.32377	4.1765	12.5291	15.4677	7.6346	12.1994	7.55977	7.57395	6.44283	5.45634	8.68059	7.42599	4.12219	4.47531	1.23205	0.812828	2.05987	1.08508	2.54889	0
Pita_unigene59411	0.164312	0.109067	0.705317	0.284159	1.62227	4.0896	0.465016	0.27142	0.632396	0.93382	0.581174	0.950082	0.416599	0	1.47456	0.809683	0.458139	0.460103	0.30479	0.0538111	0.35647	0.599172	1.3069	0.571915	0.910156	0.580349	1.15865	0.529285	0.716785	0.822199	0.853662	0.903574	1.85056	0.336695	1.99748	0.757176	2.91802	1.11753	4.58149	14.909	0.863019	2.37095	0	0.213029	1.4613	0.97102	3.73158	1.06956
Pita_unigene59394	1.96725	0.728275	1.41426	1.19432	1.5249	0.496231	1.98368	0.724872	0.855921	1.34308	1.51214	0.779581	1.18054	0.657999	1.19989	1.44162	0.834975	1.85171	0.416524	0.192554	0.373248	0.443301	0.801826	0.226953	1.15263	1.0875	0.926298	0.0567238	0.313295	0.965744	0.680968	0.450778	0.486038	0.0496111	0.308464	0.400181	0.234392	0.687786	0.658521	0.129733	0.0818253	0.42122	0.49723	0.494336	0.515669	0.188553	0.454484	0.522557
Pita_unigene59379	2.24511	0.8143	2.69417	0.625835	0.229188	0.896413	0.646947	4.3767	3.36772	1.84731	0.743514	6.05743	1.05192	1.21162	1.26869	1.2933	1.12051	1.09169	0.941266	1.44443	0.56437	1.4808	7.53592	5.58549	2.73931	0.686539	4.97919	7.41926	2.56233	11.7692	15.4003	1.42866	11.7859	4.87842	8.1179	15.9836	9.17279	1.28015	24.7213	4.45305	6.03274	21.2613	4.26792	1.38327	12.5566	4.6422	10.3062	11.1813
Pita_unigene59332	13.8212	18.4242	12.6492	5.2954	14.7698	8.94744	12.2519	21.2307	57.0468	11.4093	57.6902	24.4442	10.2496	23.5993	29.3586	33.5928	22.1504	11.4548	6.59316	15.2787	36.9421	39.0265	15.0895	17.7041	5.19217	4.59234	7.58439	4.46913	10.2332	12.1385	9.35824	4.34738	4.85172	6.58744	18.2259	14.3392	4.34523	9.87419	5.97887	7.98024	14.7571	8.55577	11.3496	10.6118	7.38904	28.764	26.67	38.4194
Pita_unigene59319	10.3792	22.3222	72.5299	23.2595	44.1433	24.838	19.031	28.9691	36.8008	28.8162	31.1904	23.8036	24.1963	26.9457	68.7726	47.2975	29.0023	37.1268	12.6578	12.8451	14.0406	16.6705	14.2384	13.948	14.1802	15.4205	17.2841	3.18566	11.2877	12.0643	6.73471	5.37933	15.9197	2.94097	4.93205	7.35329	13.7844	19.5005	32.6671	10.4591	6.70546	21.5829	12.7084	18.5948	29.2781	15.956	21.6415	13.9138
Pita_unigene59298	67.6274	43.084	73.1703	37.3887	60.7048	41.4633	74.0685	37.835	93.1045	44.2657	83.2243	45.0229	59.6797	70.2657	68.0184	102.646	120.693	149.852	14.4803	15.6045	41.1331	38.2467	57.2894	34.7548	34.2034	27.9025	16.2973	1.00251	16.0562	7.07495	26.3105	28.7284	33.0853	0.555885	7.29282	10.6088	14.037	42.7819	20.9471	1.19905	1.78086	18.6168	64.9572	72.9492	37.1753	41.7558	46.4669	54.008
Pita_unigene59296	0.158493	0.241923	0.280765	0.371648	0.534183	0.284566	0.298373	1.12593	0.455617	0.255808	0.440053	0.374347	0.36637	0.989826	0.858403	0.463018	0.57719	0.279511	0.362492	1.13186	0.453439	0.561793	0.307626	0.49591	0.534466	0.452023	0.503293	3.59254	1.12258	0.549222	3.25221	2.41113	1.76354	4.80536	2.99043	3.71775	2.09821	1.33408	2.32929	2.40273	2.02849	1.41924	0.603606	0.622157	0.986618	0.598069	1.24413	0.677932
Pita_unigene59284	1.09281	1.21544	0.591836	1.35703	1.71818	2.56038	0.174262	0.186217	1.0238	0.514692	1.38428	0.87179	0.608024	0.0887134	0.647636	1.30279	1.25178	0.495936	1.48319	0.193926	1.16442	1.80839	1.26526	1.12268	1.97083	0.688185	1.32523	3.32048	2.01813	5.31256	3.37843	3.01942	2.98264	2.06608	1.9637	8.84468	1.58513	1.55183	2.24438	2.75049	1.9616	6.67311	2.01687	1.46014	2.3045	2.72108	1.47273	5.03078
Pita_unigene59245	4.35709	4.90423	5.36543	5.34266	7.56726	3.92002	2.93051	8.22848	2.82216	4.7089	2.75005	4.81272	3.53411	5.00987	4.2465	7.05313	3.3708	3.71723	6.08489	4.84971	3.68495	3.81527	3.6676	3.58156	2.63599	4.02786	2.51085	0.456095	0.960934	2.1334	2.32952	4.68236	3.73252	0.510205	1.14488	1.95794	0.631329	2.91461	2.62603	0.873327	0.652214	1.55655	3.11015	5.27388	5.42855	6.64714	2.55225	3.2895
Pita_unigene59241	1.66397	0.638567	2.74715	6.26496	2.90232	1.18899	1.91689	1.5249	1.69263	6.8259	6.62131	1.49754	4.89274	0.722248	0.968865	4.07785	2.35829	1.42736	2.47471	0.687179	0.83041	3.43244	2.7045	1.39035	1.99405	5.72955	2.76059	1.45456	1.27676	1.37382	0.989283	1.76902	0.415774	0.425509	0.365749	1.64097	0.245839	2.88004	3.69174	1.08592	0.600119	1.47628	0.554377	1.54589	2.32404	1.59279	2.23786	0.413181
Pita_unigene59204	10.3878	5.99248	8.59506	3.07846	7.29653	9.74192	11.5145	13.5204	9.62205	6.95138	14.8895	6.5098	4.65343	7.15907	7.49326	7.94589	3.7049	9.72143	4.42795	4.64436	5.5966	4.28099	8.69935	4.53807	89.7049	64.046	38.7552	73.2784	61.9882	44.4854	132.334	174.211	77.7321	63.1983	151.645	125.849	8.5558	11.145	7.80505	10.9549	11.2666	5.87755	3.03359	5.56928	2.1388	3.8523	7.88585	3.43711
Pita_unigene59153	1.32899	4.65653	8.69262	4.44279	5.77431	3.82169	4.69173	8.29451	3.41049	3.96278	5.64942	5.174	5.38239	7.3806	5.65597	6.50061	3.29869	4.64487	2.6481	5.41386	3.38729	4.0396	3.47796	2.91277	3.70864	2.76217	2.30937	3.36934	3.82243	1.70826	2.87887	1.82701	1.3943	3.44271	1.93732	1.13355	3.13869	2.56713	2.2327	3.78055	3.14824	3.60162	4.52363	3.25291	1.94508	3.93175	7.99297	1.23662
Pita_unigene59135	13.7267	11.1489	13.3029	13.0672	12.103	11.169	5.5273	10.8877	6.4382	5.84377	6.43664	7.50163	10.2279	11.1411	10.8046	7.81633	8.40226	8.1626	9.42501	14.9315	11.8722	9.00814	10.3203	8.15061	26.1696	15.6694	15.2773	22.3779	26.8442	32.4631	20.9976	22.4688	13.4657	19.5073	23.4883	28.5251	36.2576	21.769	21.2017	25.9401	30.3305	35.8354	13.0603	9.93742	11.4876	8.79131	14.3428	16.3952
Pita_unigene59109	212.514	263.938	372.598	53.7206	171.11	152.785	316.526	419.4	401.683	77.2466	340.412	201.58	53.7888	368.972	310.033	223.367	198.602	293.383	72.7222	220.791	274.25	193.899	253.929	179.924	109.381	216.645	216.927	26.6995	205.538	114.138	57.8354	153.681	204.922	13.9711	149.035	92.6133	46.8486	200.521	243.436	47.4518	105.813	137.615	79.3048	251.172	176.022	106.076	327.233	203.623
Pita_unigene59102	1.20067	29.594	24.1675	5.96359	14.405	16.7514	49.2776	44.507	60.7382	26.2437	311.77	36.1007	11.7954	41.3953	60.9411	78.0792	34.9537	55.9329	7.90372	4.05169	9.38625	18.7801	36.3329	10.904	31.8827	5.22211	9.91749	5.83174	11.1253	1.56941	48.4083	3.81297	24.7918	5.87857	3.44702	3.38751	98.9968	9.88588	204.619	19.285	3.97373	6.46547	82.6937	58.9099	29.2287	385.845	189.495	6.58318
Pita_unigene59084	0	0.0382405	0.746965	0.0398172	0.113201	0	0	0.366549	0.0918096	0.049421	0.0740315	0	0	0	0.206915	0.151356	0	0.0359379	0	0.525285	0	0.210153	2.17583	0	0.0425506	0	0.753087	0.46768	0.0335037	0.179952	0.262305	0	0	0.684257	0	0.105991	0.910063	0.478908	1.43514	3.35888	0.142368	1.43696	0	0.0372719	0.70123	0.239083	2.79398	0
Pita_unigene59067	0	0.407102	0.403317	0.375594	1.94935	0.311748	0.0381765	0.553792	0.458357	0.611208	1.14549	0.202382	0.642656	0.58897	0.325435	1.44478	0.402012	0.0390606	0.330292	0.702164	0.369068	1.45446	0.0784634	0.521688	2.26266	0.505616	2.15461	0.708676	0.725574	0.556228	2.32173	1.16551	1.33496	0.644913	0.467492	0.400568	2.64941	0.766909	1.57451	0.407168	0.811536	1.41476	2.59097	1.53936	2.73396	0.601264	1.28876	1.27063
Pita_unigene59052	34.75	37.9499	25.5658	31.3088	34.4657	45.162	15.8537	16.6962	32.1	15.8039	6.90695	25.2579	52.775	23.0906	60.1858	37.1859	41.8087	26.6825	19.1687	31.1489	24.3622	17.3933	14.2339	24.9624	100.991	37.0348	37.4379	280.297	104.677	42.7232	82.1319	175.93	55.4343	143.186	124.646	57.7269	60.362	41.7917	32.9718	39.0345	45.7401	37.3992	16.6655	7.44138	15.4274	19.7445	10.247	7.96367
Pita_unigene59040	59.001	69.3525	249.238	12.7658	21.0659	35.2711	73.7916	93.9129	128.535	12.3441	19.1459	34.3424	18.6461	197.662	103.55	34.7669	110.531	149.42	3.86856	45.449	63.0512	8.53427	85.3319	37.2535	14.9138	4.27673	14.1293	0	34.9872	10.5863	4.4102	4.83123	45.6958	0	7.58126	16.0157	8.20773	8.70574	27.4278	0.187327	1.62795	54.775	17.1648	18.539	66.8206	9.95215	91.8337	129.195
Pita_unigene59036	0.189356	0.0471438	0.304794	0.294666	0.186575	0.465311	0.268094	0.375419	0.168217	0.134512	0.22828	0.144943	0.360118	0.369255	0.127506	0.3266	0.277736	0.176979	0.439123	0.464823	0	0.129515	0	0.329582	2.51788	0.551216	0.522635	11.6491	1.81753	0.266396	4.20026	2.63567	0.928247	14.2902	6.09006	2.61605	0.766023	0.751474	0.286325	1.13123	0.570478	0.136771	0.0453199	0.137998	0.420871	0.210165	0.284758	0.0440589
Pita_unigene59031	2.78644	4.63182	5.50466	2.87462	4.60021	1.77287	2.7159	2.3946	4.03825	0.962798	2.43787	1.61239	2.66568	1.29671	7.09486	3.53205	1.71972	4.21627	0.466343	0.66202	2.04905	1.0283	2.438	0.697052	2.75657	1.97027	2.2424	0.629019	0.814593	0.728131	0.965782	0.917547	1.30591	0.801601	0.317211	0.0678824	1.92748	1.88552	1.79689	0.908478	0.506339	1.05502	2.11014	2.30455	2.0602	0.952221	3.19157	0.430243
Pita_unigene59025	4.85318	16.9532	0.0867466	0.0984357	18.443	9.3374	4.39566	0.154827	18.967	0.181501	19.9607	9.36465	0.123571	0.0574175	18.347	23.1195	9.21865	4.79509	0.178663	0.223838	13.8679	18.2191	3.59805	7.87935	0.282568	0.0351294	0.0573987	0.0310932	4.0381	0.0874916	0.0630281	0.128993	0.138119	0.0619052	5.21288	0.0935441	0.394731	0.153672	0.0640387	0.112267	4.72262	0.119659	0.0307137	0	0.0319543	0.0583407	3.85168	0.0873435
Pita_unigene59005	4.34817e-09	0.810211	0.253905	2.11069	1.0584	1.21144	0	2.55811	0.791056	0.513819	0.830444	0.919683	0.983659	0.538046	0.85776	0.650324	1.56832	0.930601	0	0	0.329777	0	1.12981	0.386862	1.69212	1.50947	1.81218	1.62733	0.308062	0.701367	0.657437	0	0.929071	0	0	0.446619	1.06066	0	0	1.2365	0	0	0.527892	0.499962	7.2944e-06	1.52571	0.42603	0
Pita_unigene5900	1.23239	1.2967	1.28547	0.783834	1.29135	1.03944	0.665404	1.08677	0.626354	0.429349	1.02017	0.513994	0.766253	0.829465	2.66749	1.43955	0.580584	1.12917	0.444908	0.395732	0.608877	0.597033	0.673234	0.482131	1.1161	0.266682	0.509659	0.477492	0.703143	1.02547	0.671112	0.311584	0.669362	0.395538	0.131704	0.232006	0.32703	0.388995	0.304603	0.472801	0.186747	0.464611	0.0655719	0.342681	0.40516	0.268143	0.959154	0.328017
Pita_unigene58982	2.43459	1.58694	2.20783	2.19095	2.52492	2.48242	1.70302	1.6817	2.41105	1.95011	2.98426	0.979776	2.46584	1.92205	2.07262	2.05925	1.14439	3.35364	1.81714	1.66351	1.78165	1.99624	2.52227	1.24814	0.43423	1.23581	0.684209	0.104046	0.633438	2.14429	0.408363	0.215322	0.765824	0.426299	0.200714	2.16015	1.81097	1.71137	1.90049	0.757885	2.46944	3.55289	0.750018	1.77757	1.33896	1.25159	1.08774	2.14289
Pita_unigene58941	7.49331	12.0299	23.284	20.9583	14.4783	7.79469	5.06468	15.0125	23.2	36.3177	19.0073	13.5207	47.6903	11.1493	30.062	15.2624	25.0406	1.83111	12.5042	8.83333	12.6197	7.78056	5.03534	15.7072	7.56756	5.20911	6.74486	4.03102	2.22329	5.55147	10.3983	2.68749	2.81779	6.85655	3.73371	3.35946	11.9927	1.09181	14.6168	7.55487	3.52151	4.99528	15.9746	1.41468	13.2612	22.785	21.5737	7.67373
Pita_unigene58930	14.3102	7.48369	7.063	9.43084	10.784	9.42626	11.893	9.25996	7.93094	12.9056	16.3401	12.9929	9.92873	7.14823	7.80887	13.649	11.7804	13.032	11.3026	5.29896	5.64601	10.8224	10.7782	11.249	0.703824	1.52111	7.04946	1.18467	8.4576	9.12767	1.57337	1.24324	8.71444	1.28222	10.1682	9.27419	0.482917	2.48899	9.17965	0.47983	7.87539	8.45691	1.18082	2.49409	5.25728	1.37243	7.02361	6.59711
Pita_unigene58904	1.55446	3.18858	1.22335	6.25409	12.1461	4.87909	1.35774	1.016	1.04917	2.90859	0.552822	0.754434	1.36037	0.396467	6.22521	1.37572	0.922063	0.86867	0.401773	0.779586	0.876953	0.468352	0.222426	0.3022	0.288362	0.374434	0.851514	0.439411	0.630876	0	0.0762447	0.125628	0.850588	0.598144	0.32425	0	0.0866324	0.0943676	0.747211	0.192533	0.216968	0.0408172	0.304898	0.261954	0.408132	0.860504	0.524652	0.272155
Pita_unigene58897	0.178819	0.0593406	1.52048	0.282084	0.766063	1.40504	0.281051	0.472555	0.476402	0.338768	0.115012	0.364878	0.380078	0.516802	1.123	0.293713	0.946092	0.88941	0.0552778	0.0585845	0.110821	0	0.739318	0.311181	0.924343	0.126399	0.548137	0.23629	0.416	0.167812	0.348179	0.307305	0.324938	0.171141	0	0.219834	0	0.337767	0.720749	0.101716	0	0.343786	0.570557	0.0579855	0.0589128	0.105561	0.358183	0.0553966
Pita_unigene58844	7.13919	12.0741	8.30053	5.80923	18.1643	5.17309	19.1794	10.0587	20.8267	12.3838	27.0393	11.4426	11.7469	4.81846	17.3914	23.9176	5.12084	14.6641	8.20382	2.13102	15.114	17.1725	6.36187	4.90974	16.9598	4.42371	18.2374	1.07598	2.92205	3.24063	8.18695	5.85967	13.2232	0.485986	1.81471	1.61713	7.42017	4.6865	11.0759	1.35682	2.27025	3.04141	17.8505	7.45259	15.475	4.67071	5.24756	5.5987
Pita_unigene58823	9.63287	0.972491	7.28919	6.44586	9.28641	0.447643	21.0388	10.3487	2.08871	16.9403	7.10176	2.19255	16.1957	7.11064	3.19849	16.7825	2.82269	22.4832	6.0302	3.19904	0.726433	5.22258	14.1791	0.963341	0.937742	0.967545	2.23147	1.29028	1.86583	0.611395	2.72479	2.41782	3.27553	3.11499	2.16952	3.18441	3.59147	2.43542	6.85901	2.16714	1.86234	3.37812	1.37152	2.2822	12.7906	4.43547	3.34913	3.14567
Pita_unigene58821	219.531	143.437	51.1321	261.614	41.3682	175.494	62.3278	70.3004	56.1646	176.85	60.6384	171.248	210.178	84.8933	60.9349	62.267	226.424	88.9595	207.066	135.741	53.3937	90.9629	102.587	223.559	25.227	62.8199	60.7634	1.97268	9.59082	80.7779	6.93672	8.09559	12.2068	9.32518	6.02904	23.2477	41.589	105.566	123.822	96.3937	50.3137	224.861	120.06	76.1258	112.592	264.53	61.373	235.701
Pita_unigene58813	1.46278	1.58542	1.42198	0.907142	4.09593	2.13595	0.660038	0	0.110527	0	2.19149	0.386515	0.272154	0.164113	0.180067	1.05621	0.653692	0.754498	0.0878247	0	0.190127	1.7301	0.344244	0.782757	0.212297	1.18407	0.714073	0	0	0.0749854	0.0780637	0.0488087	0.376186	0	0	0.130802	0.174856	0.858827	0.617879	0	0	0.242777	0.300234	0.306721	0.563376	0.126099	0.303781	0.264353
Pita_unigene58790	22.2993	25.6132	11.3194	10.4847	11.4395	9.78943	11.8051	10.7501	25.4684	9.40657	8.50519	8.592	10.4698	7.58888	18.6626	11.3158	7.4508	16.0307	16.6082	16.5039	16.2785	11.4167	11.1355	8.1509	8.70743	3.17734	1.74592	1.5973	1.63988	1.94368	11.9748	2.64849	2.62029	1.1716	1.41707	1.69837	13.264	2.76147	3.66963	0.907089	1.63911	1.48491	14.707	4.11066	2.56579	2.52358	1.79689	3.37821
Pita_unigene58731	7.4797	8.84216	6.25093	6.1503	4.56381	8.63005	5.8596	4.75548	6.04444	4.31345	3.92799	8.89349	5.70478	5.29722	8.2549	4.90951	8.32237	5.7225	3.39679	3.73356	7.01743	3.13846	4.10098	6.38032	2.68148	3.92655	4.76047	2.4975	4.11077	5.43554	2.0694	2.92852	2.55074	1.46311	2.98127	2.40893	1.53467	2.24028	2.71384	1.55369	2.46731	3.36547	5.02769	3.99616	3.60234	3.44918	3.80282	2.68992
Pita_unigene58720	73.5042	108.138	55.6865	52.558	32.9346	61.8343	28.4487	46.6773	65.1007	42.0199	19.6228	48.7047	35.6383	42.3366	69.0131	25.0123	57.9917	32.0319	49.7313	70.0712	73.2549	42.5717	40.2107	56.122	26.917	51.9855	40.7367	77.5366	32.9801	35.0615	37.5225	60.0861	38.0069	49.6054	35.853	28.544	38.0938	55.3962	51.0307	48.4233	32.8937	36.5839	18.5688	29.5855	25.2458	13.8882	16.313	17.0013
Pita_unigene58686	91.505	11.9687	34.81	16.3049	15.8815	19.1196	51.4974	16.6855	36.7786	32.0807	29.3841	22.7416	35.343	21.0257	24.2515	30.5913	29.6798	89.1716	8.13263	5.85821	12.4955	11.8707	25.7064	11.7076	10.3707	21.1179	16.8849	0.0703041	2.3556	2.5461	2.81452	21.961	35.2042	0.0339527	2.8638	5.30973	1.84387	31.2785	29.3117	0.634315	0.492112	17.9634	4.64034	35.5827	16.9643	16.3145	11.4799	44.649
Pita_unigene58680	1.2159	1.09764	4.15868	1.34877	6.1617	2.95226	1.615	0.753505	1.78948	0.647749	2.23483	0.853376	0.614327	1.02057	3.20857	2.62163	1.24513	2.24108	0.141012	1.23029	0.671647	1.52538	1.27092	0.926023	1.17924	0.36154	1.29389	0.566059	0.63006	0.463078	3.56068	0.705136	1.11687	0.473838	0.766382	1.5036	1.73715	1.63778	3.52499	1.29735	0.66933	1.7956	1.0914	0.627116	2.73893	0.270466	1.41056	1.23909
Pita_unigene58652	0.108952	0.22479	0.458639	0.385503	0.474962	0.465653	0.115326	0	0.193885	0.1032	0.122712	0.0599681	0.155489	0.0707905	0.654683	0.364804	0.114789	0.129085	0.0505638	0.0534161	0.0467018	0.124349	0.0846444	0.118584	0.18546	0	0.0250837	0.0355669	0.0352709	0.399169	0.252008	0.108694	0.0592744	0.351889	0.113513	0.22043	0.456602	0.370987	0.474664	2.1467	0.486456	1.12483	0	0.109991	0.161334	0.135448	0.799646	0
Pita_unigene58633	5.62703	46.7115	82.8332	29.5019	23.6129	12.9167	190.685	297.373	245.351	240.864	826.756	112.775	104.583	220.242	89.9088	174.241	95.6286	161.12	104.392	21.1451	28.4546	88.6613	120.383	49.5886	84.0269	41.0896	32.5784	5.12658	9.8512	6.67626	157.913	68.1996	108.41	3.53149	18.503	36.5875	84.4119	78.9463	263.145	11.826	4.6723	35.3975	308.548	359.428	85.3111	437.555	307.995	72.1329
Pita_unigene58613	19.7502	0.176807	0	0.061434	1.51411	4.82603	0.237774	0.0586664	0.42058	0.280377	0.228451	0.241593	0.168843	0.410611	0.424896	0.291707	0.197838	0.165637	0.0549006	0.116365	0.165099	0	0.225935	0.309057	0.327871	0.125529	4.083	0.410698	1.08455	4.23185	2.19018	0.183123	4.84062	1.58647	0.68165	0.873296	1.80171	0	6.91973	0.4546	0.219466	0.626007	0.339997	0.921394	4.73925	1.36305	9.32558	0.110041
Pita_unigene58581	0.997658	2.13597	2.70706	1.24208	1.08206	1.12754	0.094149	0.59335	1.68381	0.330732	0.52924	1.52721	0.28459	0.864729	15.7622	2.99897	0.794758	0.372809	0.370157	0.39192	0.139411	0.727776	1.19071	1.73639	1.54757	1.16207	0.642444	2.2496	1.40457	1.82484	1.89625	1.54297	0.326099	1.48151	0.76616	0.781218	6.0898	2.94088	4.2236	1.87307	1.07123	6.72301	1.33711	1.89082	1.28133	2.78879	2.44997	1.25314
Pita_unigene58580	0.67609	2.258	1.86549	2.43377	1.21226	0.860418	0.826296	0.906928	1.13081	0.941648	2.41593	0.852558	1.13466	0.556925	1.32175	1.45037	1.40282	1.52606	0.627245	0.468321	1.03592	0.507953	0.380016	0.449991	1.27828	0.883171	0.585593	0.631863	0.590027	0.820311	0.0777651	0.410028	0.34641	0.152571	0.267361	0.402656	0.189375	0.180431	0.601512	0.135785	0.294967	0.651859	2.09423	2.20117	0.117821	1.06116	5.74509	0.703893
Pita_unigene58579	0.22682	3.61508	7.82301	3.45035	1.00309	5.65145	5.53455	5.62255	4.16542	2.90003	5.79553	3.55052	3.55935	5.40439	5.0601	2.45925	4.22483	9.98077	2.10442	1.70619	1.68817	1.03475	4.98564	2.56651	3.60353	2.03825	0.730639	0.0750918	0.956779	0.141759	5.57228	2.33848	2.09887	0.0725286	0.181545	0.34789	5.50906	3.98789	5.41309	0.709912	0.210292	1.05732	11.5824	5.57851	2.09038	7.90484	5.76533	0.493124
Pita_unigene58563	0.412221	0.310432	0.943229	0.185739	0.43383	0.226194	0.35564	0.967271	0.435377	0.715276	1.41159	0.630853	0.647505	0.384495	0.543044	0.54885	1.16207	0.662021	0.28414	0.529195	0.18351	0.324358	0.303826	0.908807	1.46237	0.671329	0.390034	1.51481	0.479306	0.976149	5.14411	0.714509	1.27973	1.38585	0.898092	0.955008	6.55362	1.54337	1.60175	4.69333	2.2507	1.36617	1.12263	0.28804	0.133085	0.775094	0.279773	0.764723
Pita_unigene5856	19.3546	30.0428	37.4201	25.6526	30.5613	34.9705	16.3673	17.8096	19.7378	20.0655	28.7293	15.5136	19.5727	17.9244	24.1193	20.3979	14.1443	19.0493	15.5835	11.7856	14.5451	15.0896	10.7157	9.14632	16.5213	21.7901	17.0149	1.21512	10.6445	14.3459	5.63142	5.46089	7.6314	0.25151	4.75405	4.28214	10.901	14.3988	15.177	3.57806	4.91173	13.5757	16.3034	11.9425	8.84822	8.19952	15.4883	13.0028
Pita_unigene58530	11.7159	4.84133	14.4692	10.4792	1.44712	4.55246	17.5342	6.83429	8.20418	17.6822	5.30754	9.84588	9.65019	7.35503	4.92607	3.26842	4.58281	9.0626	8.8184	4.90909	5.82481	4.51465	13.9135	7.24053	8.07322	3.09617	1.75659	0.297936	1.84672	1.01915	10.2205	2.08064	0.887927	0.281547	0.814891	1.23854	14.9366	4.10206	3.82939	1.57355	2.893	3.20772	24.2778	9.17564	6.93091	1.29081	9.82541	5.33628
Pita_unigene58519	8.34701	12.8152	5.12374	3.28899	3.76303	7.36591	12.803	1.20775	12.7131	3.80322	2.5917	4.85436	4.58606	2.28103	13.8135	3.63818	8.19588	11.406	2.91586	1.34499	10.7408	2.60912	9.16355	4.8252	3.95134	4.95234	4.59664	4.20331	17.7161	2.54764	1.15312	2.29836	2.53798	1.51898	10.483	1.24388	2.35511	1.83591	1.05227	1.85683	8.62	1.56979	1.94169	2.02241	1.64142	3.76592	10.3193	2.34378
Pita_unigene58517	33.2882	23.2359	21.4104	38.4847	106.961	50.5501	37.2546	8.28335	35.3141	33.3293	98.0973	24.6139	41.1045	15.253	35.0354	134.41	41.0268	70.3821	15.1949	2.73345	8.83888	48.539	26.7758	12.454	40.6871	8.73915	5.5203	2.85718	30.2066	22.9422	18.1561	5.74024	13.075	1.28774	5.90645	6.8586	15.3686	9.90419	10.0632	1.2288	0.978783	13.1718	45.659	21.5939	3.22405	84.1272	47.5532	30.021
Pita_unigene58449	3.5427	6.46575	5.73789	7.80269	5.01336	3.54745	2.25163	1.67893	1.95047	1.75175	1.23917	1.44053	2.77326	1.43938	5.55054	2.16322	1.76812	2.05703	1.51275	1.75246	1.69211	1.43069	1.58875	1.74662	2.18968	1.58957	4.79096	0.778945	1.53242	4.67176	0.918857	0.581788	0.852882	0.270861	0.84338	0.461361	1.46386	1.6007	2.52968	2.51587	1.68605	1.60412	2.19143	1.52093	3.34246	1.25716	2.23459	1.22781
Pita_unigene58439	12.3322	17.2694	15.1283	10.4074	11.2035	16.045	8.61657	14.5776	14.2877	13.2751	18.8665	15.9776	15.3524	20.8953	21.6481	43.8361	17.5023	5.36032	20.9119	19.1604	5.4021	23.5561	20.5388	24.233	10.175	6.52333	6.35093	22.6786	35.8393	52.8119	17.6226	30.8189	12.1017	29.0696	21.8622	44.0949	100.437	38.259	92.6629	41.1065	28.1967	94.1326	9.78739	7.33758	34.6929	37.5452	40.1558	23.8173
Pita_unigene58437	6.37143	12.5355	7.19854	5.8552	11.6598	7.62508	4.08474	11.1697	7.78254	3.98349	6.2411	6.34643	3.66468	10.7888	12.4008	8.79825	5.46898	3.84909	5.25233	13.8773	10.8599	7.79684	4.97263	5.89957	21.576	21.7337	19.3278	14.6536	14.11	14.2647	28.7271	32.549	29.7782	10.8361	24.045	18.6648	21.5548	26.2562	25.1737	9.37082	19.9487	11.5055	12.7348	14.4708	16.6201	3.89526	8.75542	8.63009
Pita_unigene58431	1.03656	0.820132	1.51409	1.23296	0.926963	0.929963	1.84396	2.02574	1.46321	1.5591	2.26301	1.02729	1.24694	1.34685	1.28781	2.07356	0.924064	1.34329	1.58423	0.896861	0.709276	0.751308	1.16608	0.610398	0.878792	1.15918	1.1788	0.0303016	0.133054	1.02856	0.774475	0.534319	1.02836	0.0878063	0.117166	0.672916	1.51075	2.83652	4.27429	2.57671	0.678454	2.59037	1.10931	1.92256	1.68529	1.22274	1.01006	1.33624
Pita_unigene58299	37.2481	25.6577	30.8157	23.3351	20.596	22.1983	20.2239	20.6531	20.4034	19.571	18.8564	20.4439	21.6557	16.8024	15.3639	19.6946	17.0991	19.3461	18.9889	15.2668	18.3365	18.4511	20.0627	21.0522	10.4996	16.6589	18.3463	5.54681	10.2974	27.304	2.6336	3.83905	6.17664	4.16397	2.44629	9.65507	32.181	38.64	52.5584	34.1645	30.1038	49.8543	18.845	19.6832	25.2466	23.187	20.1122	25.5872
Pita_unigene58283	3.12087	0	3.71792	1.8468	0	0.158924	2.26515	1.49549	0	1.80969	0	0	2.44542	1.35914	0	0.327395	0.377558	3.38287	2.00997	2.32784	0	0.213173	1.82002	0	1.9202	11.3	15.2817	32.1525	17.5771	45.4788	0	20.5633	21.895	30.0095	23.7418	52.9445	0	16.1337	17.4013	30.1383	22.4619	47.3402	0	13.3217	17.1364	25.3953	24.7848	52.163
Pita_unigene58271	245.456	257.411	198.853	214.275	95.8531	104.473	363.992	204.505	393.236	378.837	335.847	319.185	393.84	210.383	275.215	344.094	218.233	367.93	295.584	102.765	262.248	207.721	358.804	214.369	122.316	96.5291	148.632	52.6972	142.696	99.2974	116.829	97.906	152.585	56.4619	113.965	105.776	185.267	78.7401	267.831	92.2938	92.3229	106.99	317.848	159.523	256.863	293.995	317.439	189.986
Pita_unigene58211	22.401	34.218	54.9434	28.2547	68.676	14.3771	37.639	54.3563	106.93	34.6669	101.602	15.5063	46.6701	67.0363	69.1591	107.601	28.0803	78.2318	14.9032	31.4354	48.7477	53.7112	22.1417	13.34	35.1067	27.0955	17.2504	0.849821	11.0969	6.59238	28.7913	21.1702	40.7799	0.566823	14.2138	10.8765	36.0455	29.0448	29.3193	2.71897	7.34299	20.1858	66.1061	47.1597	38.3807	29.2688	35.1857	31.3579
Pita_unigene58210	2.52654	2.40577	0.635057	1.57995	1.17592	0.657797	0.491344	1.14208	0.891445	1.2316	1.04421	0.379313	1.0601	1.06232	1.43531	0.993919	0.281036	1.36915	0.654976	1.27585	1.24444	1.18653	0.816726	0	0.205918	0.667703	0.273571	0.701181	0.291842	0.870769	0.253907	0.268142	0.161787	0	0.428246	0	0	0.131976	0.149869	0.480066	0.378926	0.609238	0.320168	0.114164	0.220122	0.529046	0	0
Pita_unigene58193	2.47383	2.59264	2.33062	0.553654	1.55308	8.69345	2.51341	4.91583	2.07227	1.59271	0.806772	3.41313	2.48601	3.78116	2.56301	1.75502	5.55452	2.09513	0.507002	6.59224	2.04355	2.24931	1.78859	2.07907	13.8073	3.87173	1.50374	48.7451	8.16504	3.56708	31.2287	18.8055	4.4789	84.9376	56.1365	12.307	10.3542	6.61669	2.94756	14.6414	17.522	2.55605	1.50794	1.83939	0.36833	2.87547	2.83362	1.82346
Pita_unigene58183	167.413	61.2348	18.4631	35.6213	25.266	91.5726	38.6464	30.4761	55.8414	21.6663	55.5789	21.5288	14.5067	71.737	101.739	30.1318	20.5124	32.5251	29.2113	92.9143	151.323	113.763	105.686	42.2403	20.4847	60.2518	24.8397	14.832	85.4481	59.0423	10.8552	3.93101	7.55419	7.91387	4.44582	15.8879	4.68884	13.0149	14.8566	6.31538	3.8376	14.9415	77.7623	51.3884	48.1626	52.9837	53.0929	34.0905
Pita_unigene58171	4.61076	1.49165	0.833643	0.613122	0.426202	0.813855	8.4875	2.65699	1.50571	1.38096	1.25396	0.88504	0.899479	0.614629	0.955764	0.776854	0.728197	5.01631	0.767789	2.20422	1.20981	0.826918	5.46026	1.2005	0.74253	1.04178	0.834144	0.626137	0.378312	0.775888	0.499999	0.609445	0.6865	0.415771	0.302781	0.580335	0.450376	1.16215	0.357628	0.504563	0.511499	1.13994	0.867806	1.95149	0.428072	0.981484	1.50232	1.83558
Pita_unigene5817	0.450695	0	1.20492	0.229062	0.258972	0.102587	0.866239	0.723506	0.170671	0.316771	0.595538	0.371815	0.104955	0.91601	0.314691	0.625586	0.0826342	1.33712	0.0994768	0.197707	0.30725	0.228062	0.764133	0.202967	0.381419	0.158357	0.306145	0.159809	0.0972702	0.526586	0.102889	0.196249	0.65494	0	0	0.167637	0.658806	0.577067	0.511966	0.150467	0	0.47952	0.414812	0.227098	0.283012	0.401412	0.131013	0
Pita_unigene58140	15.3721	3.0932	2.7427	3.89338	4.91027	10.8966	2.12635	3.42787	4.22187	3.39089	4.67374	7.15954	3.62788	4.31405	9.91509	5.08238	8.88565	4.7449	4.6866	6.89461	7.93154	11.8359	6.72718	14.6293	6.64524	7.97864	2.73544	15.5491	11.8043	7.48948	20.865	9.74963	5.09365	33.3302	16.8047	7.82897	28.9607	8.70137	12.376	24.0111	14.1768	11.3061	8.36222	7.83922	8.52127	4.38661	10.7635	3.01267
Pita_unigene58116	0	0.0314347	0.112504	0	0.439134	0.310811	0.123081	0.285042	0.143546	0	0	0	0.0381287	0.19177	0.0283288	0.0311716	0	0.664089	0	0.0628702	0	0	0.705279	0	0.177489	0.066595	0.258482	0	0	0.554373	0.887	0.268473	0	0	0	0.668586	0.635795	0.182084	0.225978	0	0	1.64628	0.231061	0.926942	0.473808	0.255199	0.159279	0.0792563
Pita_unigene58059	0.813509	0.469093	1.8509	1.51006	1.94807	0.819933	0.936295	0.382039	0.494535	0.658337	0.247734	0.349631	0.529323	0.556546	1.0431	0.50641	0.215577	1.08491	0.397205	0.638538	0.485906	0.312446	0.768656	0.819815	0.718796	0.362365	0.078797	1.95516	0.173291	0	0.520932	0.00396092	0.652788	3.31568	0.246687	0.462578	5.45283	3.05909	3.49661	3.14898	2.83156	8.68361	0.450913	0.291108	0.331135	0.380555	1.09472	0.558187
Pita_unigene58049	20.6059	16.4559	11.7579	13.4259	18.6998	22.7295	3.95993	19.1621	9.31178	14.0514	13.1353	15.2272	15.3956	23.9386	4.96637	21.1532	18.2331	4.46314	22.6948	61.947	7.81734	27.2256	9.224	27.7281	35.4719	33.54	26.9946	62.2442	9.21244	26.3977	55.7382	52.8687	24.6134	48.2127	17.5622	26.9785	55.1234	51.1859	32.2858	31.639	25.694	22.4949	28.9351	24.9285	32.4811	19.9834	10.9175	16.4263
Pita_unigene58015	8.59595	44.6055	107.422	76.3152	60.2597	84.1901	108.131	68.3641	92.506	142.324	133.42	58.8881	92.5973	80.2149	74.6228	85.6033	66.8812	152.988	87.7545	13.7545	13.7861	24.0256	65.3146	25.088	52.0752	33.954	26.6542	1.0718	9.03249	5.68725	45.3022	24.278	29.2399	0.647026	6.12038	11.3808	14.0992	34.2353	65.9855	6.76249	0.343808	13.956	115.341	142.176	26.1248	298.574	179.993	36.8287
Pita_unigene58001	7.79178	5.84725	8.26851	3.2908	5.04719	4.77297	4.3694	3.66658	6.58714	4.03379	3.60514	4.59453	2.31142	1.42	2.72609	5.54809	2.88596	3.03412	2.10155	0.537793	3.19169	2.48073	1.92043	2.25923	2.95638	5.00078	3.64089	0.558073	0.815784	0.477689	1.33092	1.2765	1.08408	0.748567	0.576763	0.287181	1.32796	1.16822	1.48226	0.537716	0.40759	0.637153	6.20128	4.03021	2.32538	3.20441	2.02231	1.88634
Pita_unigene57976	7.84647	5.10872	6.49439	8.49157	3.99535	12.3056	4.00347	4.71282	3.52899	4.44296	1.98604	6.02066	7.57053	0.877946	3.25587	2.33045	5.23465	3.68193	7.82647	1.62415	7.99176	2.25894	4.90034	8.5044	2.18162	3.19923	3.4114	0.65848	1.30921	2.64739	5.22271	2.06833	3.41978	1.96948	2.11033	5.36917	2.97283	6.50252	12.9591	2.36773	4.31711	8.2369	2.72271	1.76793	4.25148	4.67619	2.43163	2.53307
Pita_unigene5793	5.21011	3.71697	4.4027	6.17732	6.10783	7.33093	2.16715	3.35817	2.6189	4.16252	1.64697	4.15958	5.37162	2.67806	2.36508	2.81313	2.51251	2.65723	8.60873	6.13028	2.94586	2.50704	2.4702	6.21424	6.3556	19.3581	9.29312	16.2642	9.25699	7.39048	5.07149	15.4844	10.6386	9.41365	8.15272	7.78144	3.93894	15.5469	7.71642	9.21708	8.18074	5.80398	3.38382	13.1783	6.55148	5.33127	4.18511	7.40571
Pita_unigene57917	0.461502	1.06895	0.741248	0.452786	0.984142	0.750011	1.70439	0.853046	1.00061	0.298721	0.795118	0.344428	0.975633	0.960091	0.679443	1.24151	1.13949	1.39645	0.0549631	0.353958	0.704253	0.207642	0.656443	0.252938	0.646281	0.52927	0.332814	0.259352	0.171226	0.906424	0.743546	0.32511	0.455673	0.671031	0.295243	0.499553	0.696068	0.670789	0	0.208384	0	0.763236	0.127632	0.434165	0.3232	0.448494	0.22142	0.342799
Pita_unigene57901	11.2194	16.9026	25.5691	6.25445	15.2392	3.49893	29.8935	27.8814	58.599	21.7094	79.0102	17.0752	23.5806	43.3114	31.0894	68.8995	20.7492	50.4017	5.13031	10.7483	18.0023	24.3808	20.232	10.3896	10.2663	12.1245	6.80608	3.00066	2.72493	1.13364	11.9318	18.3977	23.8247	3.09027	5.28193	5.91948	6.92135	25.8602	21.6428	2.6034	3.471	9.47484	30.3544	50.6608	29.3494	19.1625	17.19	16.0546
Pita_unigene57887	5.29999	13.9504	18.5602	10.6961	23.4877	8.86064	6.75598	4.27561	9.92928	3.57649	1.69673	4.07458	3.736	5.68661	23.0839	6.06239	3.3614	10.1763	1.20966	2.32649	8.39529	1.759	5.69732	1.91572	14.2873	2.23106	2.7939	2.83508	7.85674	0.777577	4.25934	1.86829	0.691199	0.690959	3.4481	0.564906	2.43255	0.71299	1.3462	0.894749	2.92816	0.776333	7.60539	1.5624	2.34905	0.976653	13.357	0.952928
Pita_unigene57880	1.00868	1.35861	1.25532	1.97038	2.28753	1.04899	1.34291	2.11681	1.52808	2.58536	1.66005	1.27125	1.41024	2.9323	2.12931	2.45593	1.38798	0.830055	3.13647	5.71495	1.82022	3.62331	2.09465	2.32321	1.44592	2.51635	3.87404	3.35185	2.07052	1.67043	5.94999	6.48512	5.69268	4.94058	5.92108	7.27593	3.55519	4.97618	4.42437	2.37944	4.45432	4.56308	1.98784	2.53965	3.92909	1.36612	2.49589	2.53669
Pita_unigene5787	2.74232	1.61499	1.29626	1.79503	2.56136	0.422509	0.504708	0.796582	0.997793	0.742825	0.649363	0.392465	0.754	0.514281	1.61329	2.22079	0.226486	0.371649	0.409828	0.11593	0.879768	0.410928	0.114584	0.204445	0.553075	1.31507	1.01101	0.178453	0.217468	0.430999	0.125288	0.942311	0.616844	0.19853	0.329511	0.196172	0.221803	0.746307	0.384295	0.251939	0.0230771	0.150992	0.184227	0.710741	0.239671	0.194808	0.0835852	0.542186
Pita_unigene57862	0.202875	0	0	0.108811	0	0.153363	0.10726	0.588859	0.151893	0.300645	0.400563	0	0.257169	0.182614	0.51796	0	0.293117	0.434282	0.303958	0.106511	0	0.13728	0.121878	0.0910712	0.584255	0.855113	0	1.38607	0.253049	1.20635	0.770039	1.19784	0.311278	1.90218	0.365812	0.84991	0.499613	0.958262	0.206442	1.61854	0.650128	0.63777	0.538285	0.692539	0.376328	0.48647	1.02849	0.615399
Pita_unigene5786	3.2054	1.97532	2.71689	2.37469	1.53811	4.74593	2.80604	2.52657	3.00248	1.13531	2.22901	2.12615	1.52391	3.48005	2.37923	2.47608	9.11996	3.38403	0.122255	0.811128	1.44694	1.27507	2.03722	2.01342	0	1.96575	0	0	0.590797	0.939322	0	1.66789	0	0	0.344527	0.607067	0	2.55383	0	0	0	2.2173	0	2.73439	0	0.11389	2.75534	4.65505
Pita_unigene57844	2.32832	3.19376	1.48045	2.87908	2.60416	1.92337	1.5995	1.1204	1.92284	2.59753	1.2322	1.84558	2.19078	0.828489	4.45007	1.30033	1.88435	3.38504	1.22952	0.659689	2.09391	0.839586	1.86869	1.00169	1.08058	1.16128	0.844517	0.9182	1.22485	0.718666	0.3974	1.43957	1.09488	0.226208	0.774058	0.165597	0.529612	1.03977	0.39858	0.824608	0.423723	0.866542	1.11539	1.66846	1.85425	1.02328	2.32912	1.20943
Pita_unigene57820	31.9872	17.4801	2.06451	24.7435	34.9912	18.177	17.6933	2.40118	15.9005	24.9038	25.1799	18.3833	26.5859	3.5008	37.2828	36.3857	15.3388	22.9661	16.5321	2.73063	14.2427	19.805	17.263	10.9232	6.53905	0.599864	1.58998	0.66237	14.5495	18.8182	2.98761	0.584574	0.743036	0.401888	4.16803	6.71035	11.5695	1.18335	0.932259	1.23629	9.00929	36.2379	18.5281	0.713852	3.56791	2.32332	13.4961	17.7682
Pita_unigene57788	0	0.241878	0.0893631	0	0.0478804	0	0	0	0.918341	0	0.0937044	0	0.0923832	0	0.707478	0.0478776	0	0.196317	0	0.0477032	0.677646	0.0442987	0	0	0	0.117313	0.393572	0.179896	1.38696	0	0.239898	0.500861	1.64062	0.465281	6.8535	0.095046	0.0465439	0.275392	0.16129	0.318144	2.02636	0.140323	0	0	0	0	0.681751	0.0656881
Pita_unigene57760	0	0	0	0.73605	0.404517	0	0.189185	0	0.516872	0	0	0	0.452677	0	0	1.03995	0	0	0	0	0	0	1.2017	0.183825	0.86455	0	0.470973	0	1.08331	0	0.991047	0.245014	0.595499	0.620258	0.38593	0.334649	0.560298	1.18997	0.836166	0.821453	0	0.390489	0	1.21377	1.19814	0.378876	0.532156	1.24721
Pita_unigene57745	5.69247	1.8281	8.05112	5.35391	8.31498	0.810926	3.78601	7.39985	6.92395	9.21091	11.7181	2.86262	12.4997	11.3985	4.61716	16.2511	4.86051	16.0313	2.97493	1.0935	1.77486	4.71833	3.75884	2.02714	3.79736	2.93412	1.16779	0	1.62578	0.030487	0.679387	1.87456	1.66835	0	0.0312499	0.385425	0.805838	2.58333	1.79002	0.0875534	0.0803309	0.965908	6.88672	8.55953	5.08783	2.98474	2.7519	5.0633
Pita_unigene57716	1.36566	1.25059	0.736717	0.425732	1.22199	0.515752	0.0861328	0.876959	0.915804	0.286254	0.76618	1.65464	0.679123	0.343743	1.55385	0.748173	0.298147	0.919067	1.07695	1.16865	1.45222	0.33335	0.88482	1.19572	0.108329	1.27512	0.417159	0.100857	0.151602	0.381388	0.0675746	3.42902	0.966119	0.425804	0.682328	0.775304	0.238573	1.65645	0.798307	0.274793	0.668578	0.221458	0.0802258	3.42054	1.37535	0.510589	0.680683	0.791717
Pita_unigene57706	1.0784	0.558518	6.70506	2.95322	65.8459	18.8305	11.9332	3.20741	6.20864	8.74295	1.16473	0.17612	0.328168	1.86903	59.8121	7.99299	0.579115	37.4822	0.280118	2.37111	0.762349	1.14106	1.35985	0.93856	6.31021	0	0	0.0856391	0.225857	0	0.462885	0.0889481	0.093954	0.165425	3.39651	0	1.35535	1.90784	2.43544	0.773154	4.99867	0.37412	3.38644	1.13126	2.38581	1.11177	4.1098	3.85601
Pita_unigene57671	19.7391	2.29765	0.648087	7.54639	27.789	5.04709	17.6384	1.19119	4.41383	40.7016	24.4096	4.84197	15.2847	0.830463	3.6277	17.8373	5.33057	16.3926	10.8806	1.9374	2.80672	18.3035	59.7909	8.70828	14.5957	14.1684	4.96113	100.973	13.2505	22.1664	65.1337	21.8218	5.33085	67.7945	13.3804	40.0513	117.626	25.5507	12.7894	66.3555	27.2808	60.4477	9.63413	14.6269	9.27143	17.7439	67.2489	18.3681
Pita_unigene57593	0.512416	1.57703	0.689815	0.759921	1.74338	0.862023	2.3216	0.797716	1.88449	0.832186	2.96734	1.40447	1.62396	1.8596	1.50929	4.47246	2.25449	3.62009	0.354395	0.576216	1.25442	1.20013	1.95364	1.27363	1.03727	0.311035	0.201847	0.144901	0.142316	0.274969	0.213447	0.556352	0.798877	0.13992	0.280787	0.540613	0.486899	0.944371	0.294923	0.24977	0	0.491571	0.490424	1.52954	0.57916	0.516995	1.17172	0.634711
Pita_unigene57581	0.668843	1.91778	0.353796	0.349233	0.757373	0	0.362097	0.470498	0.20684	0.136428	0.880592	0.168216	0.0971394	0.181713	1.04625	0.577815	0.0759934	0.179292	0.301265	0.808855	0.79869	0.380702	1.05835	0	0	0	0.171059	1.31425	0	0.182379	0	0	0	0.458925	0	0	0	0	0.84862	0.915712	0	0	0	0	0.180784	0.112858	0	0.290106
Pita_unigene57577	13.366	21.3673	9.81839	8.09261	13.4191	20.4048	9.77946	13.8954	12.3452	12.3218	10.7484	27.4579	7.75165	11.0949	17.9239	22.8962	25.0476	13.8331	9.4129	11.2486	9.26764	11.2748	7.71281	15.1072	13.5044	8.07882	17.035	1.06769	7.32089	17.6441	10.5761	2.57037	14.357	0.564717	4.76303	6.56318	12.6321	7.03086	21.8874	1.02562	4.4807	16.8958	26.0789	9.17549	14.061	4.13469	16.9756	11.0737
Pita_unigene57571	0.40395	1.14649	1.65496	2.11271	8.41504	12.0608	0.727179	0.307253	1.02272	0.880613	0.0454317	2.03089	0.12631	0.358588	3.14092	1.8328	2.20849	0.869476	0	0	0.576538	0.201917	0.169167	0.963323	2.59823	1.51908	0.162954	0.451088	0.193179	0.633191	0.129556	1.0002	0.0482211	0	0	0.0815352	0.0843046	0.753125	0.0446365	0.302305	0.0820889	0.213295	0.406088	0.686127	0.0437307	0	0.177596	0.247331
Pita_unigene57561	3.15028	3.86514	0.247341	0.199233	0.264333	0.566754	2.75771	0.190462	3.31135	0	0.222259	0.941265	0.0730744	0.0665741	3.76064	0.189335	0.613259	3.77625	0.10693	0.207977	3.60986	0.175256	2.82694	0.869405	0.085164	0.0406187	0.141429	0.38154	0.134114	0.144068	0.0749993	0.158434	0.0836506	0.294812	0.110695	0.141426	0.365908	0.13073	0.271175	0.229551	0.320564	0.148195	0.183915	0.149198	0.151745	0.136719	0.115634	0.465312
Pita_unigene57556	0.309406	28.453	63.5562	23.3528	21.6364	15.6013	68.5957	81.0975	68.4394	110.01	206.08	19.3398	40.6076	54.003	53.0201	111.916	19.5013	80.4194	52.293	4.35007	12.6824	21.8348	43.3858	8.13947	41.6703	19.2075	11.7716	0	1.02017	0.61225	44.5515	17.4173	34.8726	0	1.4861	1.58138	9.49818	22.7686	75.8616	3.93251	0.159375	2.32214	113.119	134.659	16.5294	144.862	68.5615	11.8245
Pita_unigene57527	0.382238	1.22617	0.264339	1.31836	3.14766	0.493715	1.26038	0.456266	3.07626	1.17936	2.25105	1.57401	0.858738	0.38788	3.11162	1.95844	0.79238	1.90302	0.550851	0.058182	0.535342	0.766272	0.827328	0.469861	0.335764	1.47651	0.436146	0.330332	0.31825	0.0988168	0.105103	1.05139	0.290344	0.385631	1.19133	0.482081	0.43151	2.25651	0.404438	0.946445	0.469769	0.273493	0.101754	1.26357	0.169497	0.595765	0.736204	0.380736
Pita_unigene57520	0.30646	0.300622	0.141958	1.12495	1.16244	0.321873	0.712388	0.841583	0.665665	1.74085	2.02973	0.736151	2.52028	0.664542	0.338253	2.32163	3.42351	1.35346	0.979469	0.338403	0	0.638559	0.218615	0.90592	0.0535963	0.0502125	0.0382268	0	0.0467569	0.0656652	0.267514	0	0	0.0336109	0.0733845	0.217451	0.036439	0	0.0435309	0	0.032476	0.231251	0.29857	0.400206	0.144876	0.290162	0.468826	0.948719
Pita_unigene57516	0.169281	0.602836	5.16092	1.76911	2.5018	1.2766	0.561432	2.05431	1.19105	2.00843	1.55221	1.06059	0.995746	1.10121	6.41689	0.986667	0.864446	2.70783	0.613894	0.778538	0.28151	0.197729	1.7295	0.407388	1.43733	0.598735	0	0.218502	1.06971	0.0482599	0.737722	0.223484	0	0.366447	0	0.237269	2.13069	2.94725	1.41712	0.527414	0.306101	2.88023	1.37541	1.99118	0.984144	2.2266	2.78765	0.501029
Pita_unigene57456	0	0.114423	0.576172	0.0589464	0.112232	0.111605	0.16074	8.93986	0.0914584	0.109464	0.3836	0.579602	0.270039	17.5465	1.12138	0.202696	0.0949803	0.0530027	0	0.446555	0.0528124	0.56959	0.328271	0.494287	0.895118	0.554187	0.104487	4.00162	1.53634	0.321728	1.21709	4.78721	1.82823	20.1742	4.18602	2.87804	3.03788	5.51677	5.13394	8.81158	5.15866	0.422508	0.46864	0.165739	0.280689	2.33148	0.284527	0.639476
Pita_unigene5745	8.68601	8.70004	41.629	10.219	24.9376	13.1515	11.9417	16.2267	14.0807	12.6823	9.76271	9.51647	7.69401	12.4487	28.711	20.3431	12.3879	24.3468	7.60203	6.69137	6.96935	4.65881	10.0441	5.80369	16.1618	10.0612	8.48287	2.32692	5.21581	2.60845	9.72917	6.91277	10.9657	2.75487	2.4833	3.66377	9.45757	17.71	16.0052	2.42226	1.45385	4.76828	14.0495	17.6042	10.7425	9.51704	16.6618	7.43773
Pita_unigene57432	4.04876	12.9654	7.39803	4.88238	3.07903	5.21414	6.1421	5.96496	10.7394	8.551	10.5557	4.96873	4.83787	4.88531	4.27175	5.28436	6.4073	5.8219	0.811918	0.913821	0.813934	1.44648	1.93218	1.09502	7.94034	7.24667	2.41551	0.216997	2.91186	0.975331	5.16991	1.636	1.13301	0.104782	0.735143	0.2017	2.7588	1.92261	0.771969	0.420187	0.253562	0.157899	16.2362	9.15056	1.45975	8.14809	20.4474	0.864925
Pita_unigene57426	0.104845	1.29719	0.619669	0	0	0.101847	0	0.416729	1.16473	0.0500711	0	0	0.0492741	0.226122	1.61608	0	0	0.0967922	0	0.309912	1.17856	0.0475575	0.0505251	0	4.50649	1.43284	0.145127	4.5062	3.27726	0.496215	3.57493	1.34455	0	1.69728	2.46213	1.36688	2.12043	0.944786	0.107902	0.580477	1.36711	0.606362	1.36702	0.637749	0	0.321773	0.62913	0.302638
Pita_unigene57419	0.513371	2.6318	1.66952	0.397628	5.74962	0.526174	1.21432	1.0586	1.76536	0.495341	1.56879	0.530205	0.225896	1.80462	6.04353	2.64843	0.596506	2.41697	0.10513	0.463933	1.23279	0.799789	1.4591	0.192257	0.41693	1.25749	0.149163	0.198128	1.84891	0.519581	0	1.02079	0.152831	0.418902	0.12186	0.161271	0.655116	0.912558	0.0970071	0.145445	0	0.202954	0.329428	0.677312	0.147122	0.516777	1.00273	0
Pita_unigene57404	25.069	22.7555	43.3835	34.0478	55.9047	18.4826	39.7958	10.9154	14.8368	19.146	9.07697	9.90344	28.8788	7.57786	43.1608	41.4872	14.399	53.335	17.1553	10.8115	12.457	17.3948	26.2212	6.17004	13.6803	19.7549	20.9469	4.75784	5.7428	6.50565	4.48178	5.6561	2.27971	0.507917	1.73983	4.68735	3.64032	9.91076	5.95864	0.261308	1.57768	9.75075	15.4257	25.0976	11.6387	7.04074	17.8561	25.6015
Pita_unigene57389	12.1163	18.2498	11.4256	13.2048	13.3558	24.3639	21.2332	8.02336	17.9527	11.2834	13.5035	26.7035	14.6671	5.69239	20.0611	14.5003	25.2782	18.8777	9.3496	4.05012	13.5867	15.5968	13.3662	16.436	1.97419	4.20537	9.03834	0.403971	1.8212	1.38491	0.446539	2.20459	3.43924	0.438913	0.97735	0.28142	0.920477	1.21204	2.10384	0	0.471892	0.784024	5.84823	5.6907	7.14225	2.98099	1.63275	6.91477
Pita_unigene57370	2.10413	5.35381	1.74688	2.6651	4.15788	2.76977	2.23471	1.34515	7.14012	3.89959	3.81224	3.48215	2.37331	1.47246	7.36022	3.84707	3.46346	1.91204	5.0469	2.73847	7.56902	6.84857	4.13434	4.71033	1.54687	4.14303	7.93245	15.6318	8.11134	15.5995	2.5966	5.81851	9.0491	11.5575	7.46076	17.5777	7.67881	5.97334	12.0062	10.0866	8.06101	17.539	3.85965	5.01796	11.358	7.14989	9.67429	14.2103
Pita_unigene5737	0.457074	0.584958	0.961052	0.745496	0.711192	2.24382	0.184651	1.16458	0.521796	0.432977	1.19711	1.13233	1.42764	0.849358	1.28834	0.514781	2.55985	0.790826	0.484382	1.66936	0.546191	0.892441	0.498183	1.13619	3.54343	1.03928	1.50084	3.42778	5.80973	4.29055	4.0656	2.62589	3.06243	4.55923	2.8187	3.49363	1.92438	0.887826	2.89448	2.89677	3.50968	2.44582	0.249993	0	0.839184	0.866192	2.15704	0.66709
Pita_unigene57365	41.9	30.0609	32.9212	20.7673	35.3506	20.5807	53.4487	53.7131	37.4097	43.1619	81.478	37.0186	41.1472	35.6081	30.4388	75.2346	29.2264	47.1809	35.1755	17.084	25.3353	41.1552	26.7447	20.7468	31.0396	37.0412	32.4775	10.5779	6.61174	18.8577	24.2424	30.9539	26.8611	10.557	7.03139	11.6125	25.4248	34.7197	36.2811	18.4349	7.5565	22.5999	53.6992	42.9008	32.4224	34.7951	17.0909	22.9782
Pita_unigene57361	0.259906	0.609844	0.9322	0.970141	1.86132	0.48605	0.193094	0	0.46206	0.344582	0.200416	0.0796263	0.197787	0	0.839614	0.384301	0.0657275	0.390159	0.168837	0	0.137455	0.0621154	0.775546	0.0428329	0.563903	0.219472	0.174467	0.0677455	0.408381	0.146112	0.533573	0.428706	0.197901	0.0249639	0.0999057	0.14336	0.0469656	0.17697	0.188419	0.0221905	0.0964051	0	0.248881	0.226843	0.363754	0	0.820762	0.171933
Pita_unigene57338	0.830813	2.06821	2.1493	5.65697	8.40126	0.918445	1.17588	0.102936	1.19919	2.06569	1.30223	0.476898	0.691214	0.22505	7.36394	1.33058	0.391207	2.03666	0.770601	0.357032	0.9174	0.473441	1.28886	0.180745	0.460243	0.219998	1.14635	0.1545	1.13265	0.438406	0.151801	0.535392	0.679004	0.0994739	0.69778	0.621979	0.790569	0.412067	1.46542	0.088623	0.625705	0.649645	0.0994166	0	0.872178	0.0921168	0.832611	0
Pita_unigene57330	2.55129	0.108633	0	0.263954	0	0.193545	0.0691811	0.147658	0.270667	0.279151	0.184001	0.0386287	0.293501	0.0662967	0.407635	0.250942	0.336664	0.139975	0	0.442083	0.0347444	0.143995	0.0691949	0.195034	2.02173	0.0795403	0.0677481	0.688011	0.0650471	0.518274	4.83648	0.0803373	0.120976	0.210447	0	0.170436	9.09609	1.43785	2.54992	1.20885	0.142848	0.728983	1.53567	0.36259	0.14378	0.193322	1.33589	0.341794
Pita_unigene57295	0.70343	0.479442	7.19473	1.03675	1.8552	0.436974	0.76937	0.477233	0.625082	1.15708	0.713926	0.151185	0.281688	0.416996	1.07542	1.20423	0.155581	0.936	0.137399	0.254259	0.241113	0.506707	0.106151	0.0966745	2.50326	2.66126	0.442972	0.183867	0.193869	3.29712	0.593541	0.305357	0.120907	0.0355183	0.0711206	0.136272	0.0705303	0.839924	0.298672	0.0948082	0.0343253	0.285685	0.177238	0.179701	0.18278	0.131794	0.185744	0.172494
Pita_unigene57291	2.60264	0.913545	4.09345	2.67574	5.14456	1.56204	3.32738	0.43008	1.06091	1.90417	3.4155	1.51816	1.63882	1.06101	1.70815	4.3661	1.97774	3.88269	1.07088	0.182249	0.942393	2.21384	1.90345	1.19513	1.97846	0.23497	0.351876	0.73674	1.8942	0.777532	1.52507	0.599068	0.620968	0.219815	1.55968	0.524327	2.05426	0.285881	0.246827	0.313935	0.759777	0.592839	1.19354	0.158736	0.0874507	0.717832	2.73087	0.482244
Pita_unigene57289	0.0379161	0.288872	0.272125	0.0461238	0.0889647	0.0368714	0	0.328585	0.155335	0.0717692	0	0	0.0819506	0.132441	0.158376	0	0.0568234	0	0.0940168	0.227582	0	0.0364459	0.170567	0	1.0678	0.0389072	0.075939	2.28957	1.13138	0.652834	2.27886	0.391282	0.462308	6.36083	4.92058	2.16363	0.456597	0.041121	0.118183	0.301092	0.669316	0.0651889	0.135379	0	0.0757046	0	0.266147	0.0658904
Pita_unigene57271	0.648041	2.27445	1.47346	1.28952	2.11957	1.24558	1.04918	2.87511	1.0044	1.36062	1.29758	1.19859	2.05692	4.31128	2.78815	2.93868	1.15816	1.51442	0.231702	1.00098	2.24794	0.868971	0.363875	0.356291	1.67193	2.47689	1.4152	1.66252	0.958725	0.664967	0.921811	1.41462	0.417367	0.548575	0.824253	0.44722	0.541632	2.62934	0.994724	0.805815	0.498622	0.803304	1.61784	0.871805	0.492907	0.974822	0.337408	0.224303
Pita_unigene57249	2.03263	15.0931	63.5521	31.0607	50.3769	2.38786	4.26721	2.24235	6.28076	6.85545	2.74062	1.05258	8.00144	7.27172	10.3874	17.7903	2.42797	8.70834	0.797339	2.26501	2.65077	3.58962	5.87639	0.314965	9.57503	1.13686	1.7898	0.71835	6.88612	2.80002	4.45609	1.15435	1.6753	0.260172	0.260612	0.999794	1.98106	0.923377	2.78197	0.501923	0.25162	2.35336	16.1077	2.79924	23.1016	3.93624	18.2721	3.07431
Pita_unigene57229	17.2605	11.0681	12.364	8.06284	10.2749	5.69009	11.2532	11.1864	14.962	14.215	18.1758	11.2559	10.512	8.33876	15.0794	19.906	9.66948	14.05	6.81918	6.39491	6.70643	9.20373	11.3316	7.16573	37.2636	18.8566	11.1449	28.0318	17.9007	14.9464	73.3198	59.3733	41.0276	31.0152	37.4123	35.9066	62.4097	40.9817	41.8889	36.5241	23.6115	35.294	15.4642	11.6037	12.0606	12.2667	13.8997	7.41236
Pita_unigene57214	7.81419	11.7324	15.4824	8.09508	6.80986	10.138	5.53441	11.066	10.574	8.58697	7.00519	8.93478	5.83562	11.5778	14.3769	5.45667	6.11415	4.90087	4.59832	10.2146	10.3071	3.35919	4.47778	6.07633	51.2868	38.6104	22.9165	70.5369	40.6357	20.1143	64.7979	58.7311	30.3333	68.3257	58.2426	39.6524	21.5902	26.2604	14.1599	23.181	17.07	10.1345	10.9737	11.4978	6.72328	8.50489	9.96069	5.86478
Pita_unigene57212	0.351454	0.339477	1.45406	0.328043	0.603447	0.553155	0.516357	0.464474	0.218628	0.0998544	0.770181	0.387409	0.406657	0.637586	0.571912	1.54061	0.0295533	0.54173	0.151717	0.697566	0	0.431746	0.735925	0.0917753	2.99375	0.408315	0.724508	0.307169	0.286055	0.412064	1.40673	0.217403	1.73319	1.25104	0.607309	0.437437	4.50185	2.76737	1.6514	2.46565	0.734214	2.90535	1.9132	0.983198	0.574047	1.6492	1.19203	0.397066
Pita_unigene57209	8.79415	3.3261	2.86985	6.26831	5.60541	3.07766	2.8692	2.13902	11.7811	5.03485	3.32473	1.74175	4.22716	1.81169	32.8726	4.79116	0.922664	5.15604	6.85676	7.1918	3.55899	6.62395	3.7199	2.88599	10.6227	19.3834	9.2929	8.41582	12.452	7.86206	11.9906	50.7821	14.6079	9.53344	19.6036	11.8695	9.41514	39.8713	14.1446	6.63206	13.1939	6.41842	8.72676	27.6908	11.4229	3.62416	12.2421	9.86775
Pita_unigene57161	10.9546	6.55632	6.21025	5.29477	7.60446	10.1818	1.07315	1.29158	1.67766	2.03559	0.909831	0.82804	4.68022	2.94738	5.07629	3.18258	2.83149	5.56923	1.27098	7.33177	1.03416	1.62081	1.54256	1.15527	6.27248	2.50682	1.69077	73.6278	9.55295	5.28553	6.76406	8.7989	1.22486	31.3042	7.15171	6.34839	12.1593	3.3105	2.99375	13.3352	30.0522	7.31503	1.90679	0.741948	0.832025	1.57546	1.83267	1.33118
Pita_unigene57130	4.02892	8.8661	100.423	17.3908	79.8883	27.9613	7.97978	3.62068	8.08564	5.9832	8.29957	1.62435	2.31748	5.77703	37.5515	42.5024	4.0412	20.0225	1.01501	1.75856	1.3414	5.80554	9.26099	2.29412	20.8323	6.26757	3.75211	1.67764	1.77941	3.45256	5.47859	3.6412	4.17289	0.0476541	0.716217	1.42047	4.11836	12.3501	15.7931	0.297135	0.322745	10.0079	13.9993	11.6989	14.0049	2.78087	18.5965	20.2244
Pita_unigene57127	96.9813	90.7783	119.855	91.1831	87.3431	66.8146	221.97	204.876	211.906	238.933	331.675	177.456	188.934	196.073	130.526	193.066	116.092	203.46	160.352	92.7415	120.571	176.516	202.059	132.103	99.322	95.6011	125.015	45.1948	76.5176	75.6249	88.3264	97.8117	132.207	45.4406	85.0413	69.3328	54.4933	73.5635	96.5156	78.6147	45.4658	57.7102	263.708	164.57	163.96	212.074	187.762	113.974
Pita_unigene57126	12.6571	20.9901	35.5517	24.4457	55.5771	14.9717	17.716	12.0061	19.596	15.7901	20.6063	6.52602	13.7671	13.2428	53.7575	33.9002	8.19312	23.2494	6.3387	7.33091	9.31454	8.67235	13.3618	4.03302	18.674	2.67569	6.14411	3.52823	5.64534	6.14339	9.41342	1.89205	6.33744	2.62895	2.73506	4.0134	16.5615	4.58562	12.1395	4.24391	3.08461	17.2648	14.5394	7.07594	13.9137	13.5838	18.7699	14.1535
Pita_unigene57116	0.230038	1.79551	3.64005	1.65382	5.61307	3.01956	0.363135	0.51379	0.794525	0.545845	2.38928	1.22734	0.606545	0.656247	1.75526	3.1294	0.758328	0.410365	0.850576	0.743219	1.50525	3.23914	0.114266	1.40691	1.20818	0.42153	0.586938	0	0.302735	0.398827	0.93364	0.205486	0.188315	0.0382302	0.229693	0.0366896	1.37288	0.271268	0.962023	0.204145	0.284518	0.422756	0.580664	0.116119	0.677077	0.44596	0.719783	0.648917
Pita_unigene57105	19.7298	17.5617	13.2792	8.46074	17.0844	8.42191	13.5306	10.7436	15.4175	10.3725	22.5302	14.6358	6.6809	11.2501	28.3121	28.8345	17.9308	20.215	3.91154	3.7239	7.01794	6.80128	11.7846	6.39793	10.8654	15.8592	21.9584	1.84814	11.9018	16.0489	7.86578	4.96708	9.60538	1.78134	2.44398	4.98118	51.7064	26.7553	43.5796	30.7806	18.8689	48.7973	20.2492	13.2964	11.9186	18.4884	17.0057	11.4577
Pita_unigene57101	12.9169	2.12317	1.20315	0.758209	1.32566	0.803475	1.62978	1.6404	2.61975	1.41534	4.0587	0.277897	1.98303	2.58749	5.50526	6.38917	0.730035	1.70791	2.90318	1.72928	1.73018	9.23325	12.7225	1.22353	1.20658	0.620032	1.27474	6.18585	4.62879	5.04986	2.89173	3.45789	8.32185	4.31904	4.22783	6.19766	10.3922	3.24455	11.9353	7.50932	8.2365	15.1047	1.08521	1.62372	4.82504	4.83202	13.5868	41.449
Pita_unigene57095	75.9628	83.9863	73.7482	78.1617	27.1367	31.6997	80.4077	29.8806	58.866	51.172	16.0859	27.0361	50.3616	26.0423	44.8741	25.387	29.3382	69.8619	71.8425	36.2774	64.9064	27.6306	49.2365	22.7741	40.636	41.8521	44.151	6.66265	7.83053	25.7665	10.3828	10.3776	7.63531	2.3521	1.90078	9.97063	35.0848	29.6346	19.9297	26.1121	4.6726	24.3726	78.9041	50.749	33.2286	71.5139	10.1279	45.071
Pita_unigene57090	211.479	75.1034	150.228	73.1842	100.61	71.7488	102.957	100.739	148.587	49.5906	110.952	55.7211	67.8499	158.411	111.677	148.457	89.7236	208.821	20.0181	56.0634	66.0313	59.9656	88.4876	43.0753	45.1886	61.2222	40.1191	1.22616	13.6173	10.4479	53.3742	65.6406	106.131	0.879788	13.5015	18.9472	31.9149	77.1808	64.7607	1.62557	1.27515	45.2801	107.002	111.111	84.0496	82.2877	77.0993	70.5977
Pita_unigene57083	26.4259	37.1678	81.5152	30.3021	28.1985	28.4153	81.3335	135.618	106.92	75.0976	130.51	63.2232	46.651	111.445	50.4166	71.7576	48.5581	87.3241	34.3327	36.3168	22.8842	34.0077	44.5348	31.5214	44.0705	43.3729	37.7362	12.0634	13.9618	17.3116	56.2242	32.5143	64.3641	12.4281	19.9264	29.3766	46.7348	38.684	82.0322	20.0181	12.2734	24.5132	141.927	109.287	39.6759	203.957	92.9527	43.5692
Pita_unigene57081	2.03966	0.859895	1.84998	2.7428	1.71166	3.22525	0.096049	0.786355	0.402855	0.632621	0.87545	0.301904	1.01437	1.70645	1.02783	0.911942	1.20775	0.577322	0.668268	1.32996	0.680461	0.585064	0.388371	0.518126	3.73404	3.36882	2.72078	1.43475	3.77199	7.78729	2.45275	0.932629	2.84241	1.48702	1.23539	1.52655	2.99738	1.26918	2.87415	2.08268	1.65249	2.19404	0.88753	0.502856	1.50559	1.38093	2.25707	0.917539
Pita_unigene5707	2.46801	2.0193	1.21979	1.19337	2.10596	1.22826	1.48004	1.28867	1.37543	0.965013	1.47193	1.56928	1.40536	1.05455	1.71008	2.17677	1.37041	1.90847	0.215347	0.852516	1.53096	1.7036	2.43839	1.46739	0	1.19724	0.892039	0.540955	0.556632	1.03831	0.459519	0.402936	0.420367	0.361401	0.552797	0.466029	2.25759	1.54166	3.22771	0.365308	2.76953	2.1333	0.978452	0.936035	1.30019	0.990678	3.22735	0.90528
Pita_unigene57062	5.09795	4.69891	10.9833	14.0255	19.329	5.54989	3.38595	11.0251	5.01501	21.4205	18.8879	4.48785	24.0747	4.53224	6.54467	16.348	5.90408	3.78297	11.6133	4.63616	3.49285	14.1148	5.35833	2.89904	5.70868	4.85676	2.21662	1.59082	3.01423	8.42508	8.9696	5.08116	0.779789	0.768807	0.649031	4.62939	6.54586	5.73257	2.80741	0.828115	1.28866	6.49573	10.7779	4.14138	3.28646	6.36557	7.36055	8.1201
Pita_unigene57057	29.8218	7.07622	12.3505	17.0262	20.1611	16.7774	8.29339	4.55739	9.06059	8.22393	10.9809	8.1372	12.0002	8.45834	12.9425	23.6087	10.5789	19.4459	4.99967	5.61649	8.53474	11.2762	13.2231	8.29938	4.30425	9.04152	5.827	2.64959	5.25051	6.33028	2.44884	5.49711	4.58474	1.5753	1.52317	2.21558	6.96509	9.5301	9.88446	4.27817	5.49448	8.49345	5.43254	8.92838	7.16966	7.02641	4.81838	7.63875
Pita_unigene5705	0.266294	0.337435	2.73569	1.8977	4.60439	0.696178	1.36921	0.465667	1.51186	1.11955	0.421991	0.149653	0.398976	1.26248	7.39625	1.83031	0.26182	1.54499	0.253366	0.944934	1.04019	0.37441	0.743455	0.241116	0.386766	0.41265	0.119976	0.404392	0.134984	0.177198	0	0.264759	0	0.281894	0.243905	0.10584	0.334165	0.429615	0.172893	0.272895	0.289916	0.670189	0.18346	0.764441	0.107108	0.412133	0.588041	0.772451
Pita_unigene57049	38.5364	26.4062	53.9185	119.133	57.5696	21.7628	33.1014	34.8457	51.2839	108.691	53.6974	20.7705	145.176	51.0292	42.6689	75.4127	29.639	64.0387	44.9139	22.7078	28.798	32.3019	24.3637	17.8776	21.4308	31.3181	17.6076	2.98467	8.73406	5.04738	13.1017	30.9984	34.238	1.26989	4.60459	8.74916	16.383	35.9086	23.2301	2.23089	1.69515	16.5723	36.8501	57.0356	28.0098	23.3295	23.0712	27.3703
Pita_unigene57021	10.5744	76.3406	294.215	58.5629	104.854	70.7412	321.095	620.769	286.824	213.116	833.236	121.526	133.982	581.852	186.883	293.559	161.369	342.874	89.8068	129.187	56.7991	165.861	245.287	71.8426	136.415	33.2492	38.495	6.49037	82.5947	4.02313	244.32	65.8115	131.667	11.7345	129.844	32.7427	171.381	79.834	217.73	21.9508	81.9304	45.263	250.828	180.901	95.5227	344.194	387.431	31.7607
Pita_unigene5701	0.431348	0.751611	0.198383	0.278125	0.592351	0.423809	0.39671	0.327736	0.123017	0.102143	0.0789402	0.133065	0.102531	0.394588	0.29034	0.544701	0.225557	0.251674	0.150027	0.521086	0.350935	0.325959	0.265048	0.0469187	6.82257	0.397959	0.773527	44.4608	5.43009	1.05164	3.66365	4.20127	1.06193	23.463	6.57807	2.07052	2.64618	0.235743	0.262374	3.23026	2.69874	0.834024	0.0785167	0	0	0.0478047	0.108053	0.200575
Pita_unigene57003	8.26369	2.32053	6.7068	13.6234	28.1779	9.07333	14.7058	5.09029	14.0644	17.761	13.4656	8.84456	24.322	8.19716	22.4305	19.4393	16.0872	43.7271	4.04569	0.691288	4.4524	3.14327	6.85736	3.53405	3.63131	2.16649	3.148	4.37073	2.64533	0.206246	3.67934	1.22319	5.47976	0.524141	0.830814	0.822435	2.48508	1.78743	7.95784	0.513037	1.82308	1.97671	2.51365	6.31015	9.38865	5.93654	11.8077	1.94404
Pita_unigene57000	17.2364	10.931	18.4455	8.43609	14.2333	6.55564	19.9574	17.888	33.1957	17.2708	39.2562	16.4617	19.066	24.7063	18.5423	40.4153	21.7588	38.2011	6.35226	8.1002	12.2224	13.9908	12.4418	9.62993	10.8356	7.70859	5.43604	0.958597	2.81599	1.79509	9.78849	10.0727	17.0681	1.14419	2.42347	3.64352	6.59802	16.3315	13.742	1.76384	0.984019	9.79646	23.8825	29.5262	16.9106	17.7011	17.3119	16.8274
Pita_unigene5698	3.01317	2.97938	3.07251	0.858931	3.79534	1.75825	1.85173	4.14289	3.36875	2.5391	4.32022	2.90466	1.50051	2.6848	3.18596	5.66692	1.63528	2.95391	2.48211	4.14401	2.49045	3.7293	2.53762	2.74691	6.57967	4.89827	3.30902	5.95503	2.65265	3.90539	10.399	13.4291	11.167	8.47507	7.2504	6.29346	6.16882	5.4954	5.61187	4.95719	3.88089	2.55346	4.22092	3.84025	4.39418	2.33866	2.70634	2.42336
Pita_unigene56978	2.53182	4.90315	7.96906	3.97218	3.92558	9.22551	2.98174	6.44506	15.2461	7.86368	11.8509	9.00607	9.72967	11.9434	9.802	9.42715	19.828	6.01309	3.21022	3.60068	7.37708	5.181	2.0721	8.00918	3.1492	2.4279	2.30615	0	1.60237	0.273225	1.3191	1.4671	4.60843	0	0.561208	0.477748	0.36937	3.12409	5.35595	0.26784	0.344071	3.9452	5.65458	5.05944	3.76744	10.6938	5.68963	5.54204
Pita_unigene56970	8.94722	6.79573	6.02298	8.74529	2.53753	2.61176	5.54203	4.01895	3.94157	4.08136	0.95107	1.19784	6.22302	5.62083	4.01383	1.88175	2.93891	6.20613	3.23471	5.41779	2.40464	1.37934	3.01453	1.09675	6.38722	2.78404	5.02906	28.4422	13.2591	9.28378	5.62424	5.88546	6.22957	10.9476	13.6262	9.46917	5.26762	2.93284	5.28981	9.31946	13.5434	6.08559	1.08206	0.740679	2.02372	1.9256	3.43862	3.1523
Pita_unigene56967	0.34296	1.00729	1.11927	0.481237	1.35622	0.602203	0.402365	0.226306	0.441101	0.32968	0.13793	0.38033	0.232289	0	2.34449	0.734246	0.133757	0.41051	0.11509	0.181912	0.396151	0.188415	1.09333	0.0539804	0.400075	0.0842461	0.293926	0.228042	0.290657	0.324037	0.287211	0.383949	0.0868148	0.219141	0.127945	0.136554	0.249624	0.301886	0.323254	0.0454251	0.0608545	0.266862	0.439245	0.309595	0.367575	0.275701	1.23872	0.23619
Pita_unigene56940	9.42483	8.52549	6.3352	6.94579	12.5522	9.05911	4.14075	4.76498	5.04912	4.06484	3.55586	6.06691	6.9011	5.42314	6.67178	8.06122	7.18914	5.99229	4.54742	7.11555	4.17919	5.21297	2.25868	4.1149	11.606	12.1045	8.41747	47.7281	13.7204	8.16367	9.83024	29.6635	10.9555	23.9182	21.7953	10.5658	9.24487	12.1548	7.73949	17.8641	17.1424	5.6464	3.35582	3.96375	3.82235	4.03575	2.94706	2.66667
Pita_unigene56929	2.62912	2.67765	5.87068	4.57695	3.41678	2.11348	2.32495	6.38513	1.70603	6.39871	9.42848	4.19309	6.42427	8.0408	2.70031	6.2082	4.94492	2.23526	1.10844	5.0645	1.38305	3.72991	2.50922	2.30859	8.91733	5.26737	4.68978	15.4947	17.8449	14.3137	15.6302	8.65663	4.85588	14.3338	20.533	15.8173	9.16914	5.31765	5.93347	13.7376	15.6059	9.73152	3.14241	2.6939	1.77435	4.63548	8.12512	3.41883
Pita_unigene56915	1.24481	6.6174	6.76608	3.841	4.83283	4.71841	2.17992	3.02612	4.79497	3.39362	2.37122	3.50512	3.82667	3.07544	5.90702	2.80015	1.99807	2.60672	3.06364	2.09102	5.33893	3.14395	0.610598	1.67045	0.935464	2.39441	3.10342	0.304057	2.52152	3.67102	0.449935	0.348896	1.21345	0	0.634992	0.362803	1.18578	1.08435	1.69701	0.673658	0.952434	0.992665	2.66614	1.86269	1.92162	2.21311	3.2105	2.77423
Pita_unigene56804	14.5217	18.613	26.5407	24.0392	24.7974	9.53781	6.9607	50.0427	20.61	17.848	24.3622	9.90377	19.3563	50.1393	12.0536	18.7922	14.5701	4.06264	36.4983	132.688	26.6014	71.5268	18.2681	24.6954	66.875	21.6427	13.6726	95.9776	60.545	80.351	105.684	30.0945	17.8136	100.631	68.724	92.1909	126.895	28.4859	39.3176	73.0165	171.393	84.5519	87.7728	17.2573	35.7901	43.3407	70.553	70.2649
Pita_unigene56795	3.66189	3.64138	0.563472	11.1914	5.06212	10.1442	1.71632	0.904097	4.87208	3.49335	2.07957	4.65068	2.32465	0.269004	1.08696	4.51249	3.90267	0	1.13156	0	1.69582	1.93862	1.43324	1.32484	26.6253	28.4972	11.2202	5.05626	10.1156	90.7221	10.213	5.03369	2.69191	8.89057	11.1383	3.14899	19.0777	6.2451	12.2512	12.7133	18.9677	8.61417	1.75215	2.41652	5.17495	1.04218	7.83568	0
Pita_unigene56763	0	0	0	8.23511	3.24192	9.948	0	0	0	5.38483	4.05987	2.93992	6.34541	0	0	5.19802	5.87452	0	7.29184	0	0	3.58007	0	4.23362	13.8378	11.155	13.3658	9.58169	6.69105	5.12428	8.47807	10.7211	8.85153	4.29146	7.07938	5.72835	4.19057	10.4961	9.48221	4.5999	2.62085	6.01815	6.86593	7.60258	6.64486	4.03952	3.65212	4.51645
Pita_unigene56744	7.19551	1.32299	1.96402	12.5235	3.02649	1.82026	1.74528	0.78921	0.94372	5.07757	1.81244	1.08242	2.2796	1.16586	1.18682	1.31266	1.06456	3.36764	3.20628	1.06438	0.246833	0.72461	1.25491	0	1.17652	2.02901	0	0.260144	0	0	0	0.824498	0	0.250496	0	0	0.249327	0.897194	0	0.453327	0	0	0.254787	1.31458	0	0.912349	0	0
Pita_unigene56707	36.7726	23.0342	35.865	18.7985	12.9599	32.9881	44.0541	28.7524	34.935	28.4184	56.2984	71.9151	30.9595	21.5819	23.7332	32.0862	25.1024	41.7835	28.5403	23.1214	22.8558	27.2815	34.4466	45.5897	20.4219	25.184	19.6547	6.50665	12.266	25.4354	12.2774	22.1405	21.2031	5.57665	12.0046	16.6114	22.1973	19.97	23.5658	12.1819	11.205	26.4556	35.3838	37.2279	26.0222	51.1538	24.1628	22.3172
Pita_unigene56677	7.29813	17.7558	15.3859	23.5657	20.8144	22.9516	3.73873	3.02131	4.99674	4.25182	1.14154	6.45159	9.39033	8.2242	13.4092	6.026	14.7267	8.74645	4.79075	6.5697	9.36787	4.2642	5.32958	5.71949	8.56938	6.37939	8.62333	4.82894	8.41325	5.78366	1.57698	1.45624	3.10904	0.44345	2.91726	1.75972	2.86849	3.70341	1.4191	2.8039	1.7431	6.85999	9.4463	3.01486	4.44638	4.23884	5.12336	4.94627
Pita_unigene56667	0.917865	0.683432	0.211279	0.717807	0.707347	1.34249	0.214373	4.75849	0.608791	1.7454	2.22534	2.33018	2.39761	3.80636	0.613023	1.35645	2.21225	0.416294	0.212263	2.97237	0.424766	4.36535	1.73278	1.99123	0.506465	0.994561	1.0511	0	6.80243	1.51766	6.59157	4.25976	2.02027	4.32551	3.0631	5.14818	6.45983	4.38516	5.53486	2.1491	9.55626	7.55393	0	0	0.912789	0.196945	3.40773	0.419541
Pita_unigene56665	94.7107	24.8951	6.04197	5.86564	12.2895	23.3128	8.10201	34.942	15.5466	2.67377	6.82056	18.5603	3.78443	26.4083	12.1019	18.4667	16.3615	8.28566	0.867348	9.1109	4.98943	7.8548	20.5636	12.8129	123.083	150.654	18.8893	10.5349	53.5304	817.436	34.5479	16.6747	11.3523	5.52026	39.553	24.308	50.3258	42.411	48.5209	28.1265	44.0435	50.9053	5.36747	3.00203	11.8843	1.20621	5.79784	0.642518
Pita_unigene56655	11.6903	29.3674	2.09704	5.89876	0	3.38813	17.8098	2.74648	6.68057	6.5864	20.6924	4.76259	3.2828	1.21851	2.83422	7.98649	7.83947	13.7314	0.735732	0	0	1.77227	6.00096	0.245648	2.98592	1.77899	2.77959	0.51655	0.996638	0	1.57047	0.274158	1.69737	0.254296	1.0317	0	1.0097	2.34179	3.18681	0.934744	0.250938	0.284562	9.64594	5.07351	2.32212	7.6372	18.1474	1.65874
Pita_unigene56604	0.212421	111.346	53.5944	45.17	0.217847	0.828913	0.992983	40.5242	71.5723	33.5769	0.411892	1.51081	23.2059	45.4684	78.9198	0.209211	0.171206	0.193187	16.905	14.3643	63.5257	0.962962	0.602485	0.36873	50.8329	156.084	43.6017	46.1596	93.488	51.5004	25.2389	93.5701	19.3913	20.8456	23.7159	26.0501	21.3578	77.9416	24.6135	49.5705	31.0702	23.4107	46.8478	81.9088	27.4383	87.6771	82.0781	27.9941
Pita_unigene56581	25.8541	17.3989	7.36595	29.9142	10.2967	7.87344	28.1947	4.40881	8.71017	16.9142	9.88904	11.2604	7.21046	2.64238	5.99778	3.23262	3.7638	12.4992	6.64579	2.44671	14.2191	5.76483	22.6934	7.66046	14.0491	0.45027	5.26389	11.6514	6.35554	11.4296	4.91657	0	4.7378	8.71274	1.81651	12.0197	6.17304	0.714005	2.26843	17.085	1.72424	10.7978	3.13812	0.807119	2.44497	3.35626	1.25453	7.70304
Pita_unigene5655	2.43246	0.873533	2.16547	3.21227	1.86963	1.48993	1.66812	4.91353	1.93103	2.50987	0.924453	0.275714	2.21637	4.12013	1.35773	2.14431	1.5002	2.31022	1.99608	5.22419	1.42726	2.43283	3.13875	0.606155	0.988487	1.08648	0.351077	2.48051	0.481135	3.80583	1.39319	1.83884	1.26172	1.30308	0.917558	1.72843	1.702	2.17062	1.3444	1.48458	0.916843	2.23602	0.813245	0.509384	0.361517	1.53236	0.465105	1.53232
Pita_unigene56540	1.42093	0	0	0.402565	0.592516	0	0.542579	0.203346	2.90226	0.183527	0.668461	0.64396	0.550689	0.505317	1.37899	0.63603	0.781796	1.1725	0.894423	0.198078	2.53799	0.743381	0.910811	0.335752	5.6065	2.33155	0.967244	13.047	11.6421	0.729593	17.9106	9.31068	3.72807	25.5096	16.7565	5.11885	2.78426	1.52438	1.7967	3.94426	6.15777	0.582464	0.368512	0.949954	0.191892	1.80057	4.1336	0.708854
Pita_unigene56537	36.5921	31.3639	35.2707	15.4432	46.832	40.7866	41.8088	14.0928	31.8608	12.8007	27.6208	41.305	17.1922	12.4191	44.1415	43.6343	38.1782	38.6662	16.042	6.31138	46.5583	26.0142	29.7137	33.1214	15.9573	17.2527	26.1243	16.9848	28.0311	18.8995	7.02094	11.9192	11.6409	9.82435	16.7307	5.03012	14.1435	10.4152	7.54952	8.04019	15.8701	12.1801	17.6779	14.1966	17.2067	27.2457	13.1793	19.6002
Pita_unigene56514	11.1799	22.5677	32.7399	37.7863	58.1288	37.2101	18.7046	9.06391	12.1669	10.2648	6.03766	9.31624	21.0621	13.4098	29.1066	17.3326	11.5911	27.1313	17.6473	14.191	42.1039	26.5926	26.5482	8.43835	8.30077	7.70583	16.4652	7.36701	15.8132	11.0639	3.34435	8.12776	6.4419	2.42583	2.62549	2.05055	4.49083	3.30579	6.26385	1.24929	2.03648	3.63718	7.71161	6.30244	18.0054	5.54211	9.459	11.9417
Pita_unigene5651	0.163923	0.260486	0.429139	0.253045	0.387288	0.224266	0.043854	0.113015	0.121541	0	0.0745745	0.337345	0.329753	0.239782	0.550019	0.380421	0.0979716	0.066868	0.345222	0.066645	0.240722	0.117238	0.0740652	0.0759343	0	0	0.150989	0.0600741	0.0882225	0	0.127555	0.161318	0	0	0	0.0921638	0.0656209	0.189976	0.142891	0	0	0.130395	0.499235	0.263824	0.140073	0.203723	0.366079	0
Pita_unigene56492	2.49662	14.3463	3.44861	3.52793	4.36026	2.43733	4.17524	5.99768	8.84062	4.40167	3.80052	3.26386	3.04856	4.65855	9.22928	1.40557	6.77766	5.54445	4.62451	2.65405	8.09528	0.808657	2.87126	3.56438	2.75841	0.768442	3.43414	3.67277	2.48708	0.3364	0.85678	0.551851	1.84871	0.674658	0.681567	0.997188	0.672416	1.40785	2.15112	2.43146	2.47652	1.51785	3.06932	3.153	2.47698	7.95139	13.4581	0.327459
Pita_unigene56485	276.11	262.065	1009.34	13561.2	205.327	499.415	524.7	787.403	335.583	12519.6	271.529	577.609	13771.2	1192.48	212.81	213.209	697.429	348.515	8130.77	507.732	174.751	187.121	305.666	308.634	77.3996	170.406	536.82	129.044	200.074	635.303	59.9258	58.9963	197.145	74.474	84.951	415.962	36.5321	115.938	243.801	44.078	141.86	365.145	170.93	284.442	424.671	331.764	222.245	623.561
Pita_unigene56471	11.2761	13.7449	9.59562	13.6933	26.3615	1.50124	3.36103	9.29261	6.50395	10.2146	8.27149	0.34752	10.8692	8.32883	14.1795	19.863	0.694446	10.3221	6.32812	2.03332	17.415	9.14421	1.61851	0.296921	0.18876	8.82528	0.783167	0	6.10549	0	0	1.23353	0.187528	0	0.326505	0	0.322273	1.7347	0.171752	0.291142	0	0	1.14349	8.71994	0	0.591596	8.9955	0.15693
Pita_unigene56469	9.53648	7.44251	5.95813	11.876	8.83192	14.4656	11.0079	7.24192	5.12601	11.7982	16.8195	14.2022	20.0511	14.6773	8.35886	15.7713	27.2766	13.0957	9.61951	2.36438	5.2076	9.2694	20.3272	10.0628	3.01057	5.31443	2.96634	1.83795	10.3899	16.2177	1.63742	3.68865	2.80379	3.70774	3.90549	4.44165	8.67361	4.61113	18.8315	3.04707	3.94114	9.67183	3.58209	6.51837	10.3037	8.25694	11.1662	9.2295
Pita_unigene56442	16.6063	119.951	23.3764	7.3037	0.663684	7.79907	16.0885	7.71621	48.8514	3.05963	3.74736	13.5906	2.24757	5.62467	62.7907	11.6519	7.5104	17.7117	2.03939	6.27447	16.8142	1.54466	12.7975	8.1711	10.397	9.7767	60.2796	11.492	9.25363	36.0677	16.0099	6.018	25.855	11.5863	1.7181	6.15882	20.5321	9.66405	48.8939	10.8178	11.2327	28.3343	60.6327	31.4594	186.102	86.8041	40.0817	18.3138
Pita_unigene56409	0.968862	2.57764	1.10164	1.9727	3.71798	1.71949	2.62615	3.30614	4.40687	1.18922	3.79195	2.14935	4.80195	4.73434	4.36727	2.83068	4.0666	2.25084	3.21956	4.10321	3.90031	5.11155	1.49672	2.34334	8.36201	3.55103	7.77496	28.3004	6.10621	3.78868	22.0131	8.88159	15.8785	62.1541	30.0788	27.8198	3.43759	2.01463	3.65644	9.50891	3.18899	3.56532	2.5686	2.57444	4.55893	4.87257	1.20738	5.97215
Pita_unigene56408	1.43956	2.70081	2.79722	2.99541	4.38078	2.18733	1.79865	2.3727	0.566635	0.606925	2.32197	1.62743	2.12644	1.53076	3.85513	6.93413	2.60618	2.05296	1.33311	0.475407	2.51986	1.45142	1.3642	0.973111	5.12504	1.54721	0.879876	2.19854	0.975892	1.35661	1.84719	0.329978	0.526388	2.12122	0.458569	0.297716	2.26504	1.26383	0.964852	0.95395	0.148113	0.303229	1.98794	0.941212	0.158599	0.971189	0	0
Pita_unigene56377	0.601184	0	0.691687	0.312677	0.304322	4.40722	0.704634	0.743373	0.798863	0.427759	0.727103	0.305947	0.285487	2.35304	0.805409	0.148115	0.122721	2.07037	0	2.23235	0.557347	0.409327	1.85316	0	14.9537	5.48633	9.78532	93.2028	9.95939	10.7623	47.0564	31.0119	37.0878	152.213	78.7461	94.0324	2.1308	2.37646	2.11589	6.7879	2.22737	4.13684	1.00616	0.884071	1.6392	1.43679	1.64487	2.21329
Pita_unigene56376	32.7645	55.1035	28.4975	34.7071	45.0397	33.4949	51.2974	22.0038	55.2547	32.2245	28.0662	30.5947	43.2513	35.4264	65.1039	39.2505	30.312	50.3791	21.5784	13.2453	62.2836	26.3334	40.4844	23.1233	31.5688	37.2748	30.872	22.5991	24.7674	19.8253	11.2935	28.2208	21.923	13.8246	14.226	15.7885	14.3474	23.7646	13.1487	19.3391	10.58	16.9753	22.9979	29.9111	21.7567	21.8131	13.7571	18.5363
Pita_unigene56368	0	0.441683	3.13659	1.07884	1.04944	0.434505	1.11153	0.293146	1.57527	0.28112	6.30766	1.65891	2.67398	2.3196	0.52941	1.75215	3.02601	1.63348	0.137249	0.1467	0.41212	0.13452	0.84332	0.257576	0.982822	0	0.543517	0	1.16262	0	0.142781	0	0	0	0	0	0.560314	0	1.49003	0	0.548945	0	0.566843	0	0	0	0.442341	0.27282
Pita_unigene56341	8.57397	24.9932	10.5226	15.6067	17.4761	22.7767	3.88719	5.79599	15.4515	3.93096	11.1975	8.87428	7.33069	5.96547	18.0021	8.16721	9.23342	7.22716	1.32371	2.82825	15.6364	1.55726	0.949243	4.84473	3.79158	7.66286	9.17571	12.2253	7.22574	10.2302	1.65344	1.7693	3.44616	1.76285	1.91326	11.1508	0.405448	2.09858	1.72452	0.487167	1.45588	4.34467	4.64721	4.06054	1.27497	3.97984	4.40973	3.6854
Pita_unigene56334	22.5978	48.4441	96.8033	36.9575	38.6339	49.4768	110.121	178.986	177.11	156.516	273.05	124.29	104.502	180.836	107.046	123.808	63.9446	118.288	138.231	27.8461	58.6481	83.5064	96.2986	101.804	58.6091	42.6728	28.5513	12.5792	15.365	18.3399	89.2168	52.791	87.869	10.655	20.5242	29.4388	43.0155	41.5865	77.7541	19.502	6.05497	26.1985	221.309	261.371	101.023	339.462	214.918	64.1475
Pita_unigene56311	7.68685	4.36581	1.76882	0	2.90955	16.4133	6.05334	3.24587	5.49827	0.390643	16.6995	2.95937	0.130402	2.14841	4.78402	4.74506	3.26028	4.04275	0	1.35789	1.65492	2.11983	9.12115	1.43206	38.3991	43.3125	11.334	24.3403	31.2526	7.75591	66.6365	76.3194	23.9764	47.109	59.0615	32.6946	11.5683	15.9904	12.9775	9.4875	9.00814	3.00163	4.33283	13.3937	4.21803	2.9899	25.8082	1.51803
Pita_unigene56310	15.9228	22.2384	6.69623	8.70873	3.0481	3.08825	20.7359	6.65557	27.2541	10.6776	1.9917	4.05342	10.8234	7.6388	10.4267	3.51697	8.54418	8.96986	3.4334	7.19681	28.0064	4.11497	22.9332	9.18904	0.30359	2.94187	2.6446	1.75581	2.39366	3.49016	1.19198	2.26589	1.50439	2.08544	1.18168	3.82341	0.77924	2.79201	11.735	3.97784	7.37392	4.69821	0.787787	2.41993	4.76229	22.0057	10.9356	10.1202
Pita_unigene56299	7.26202	24.2225	38.4191	89.5162	6.08087	6.51504	12.316	29.0868	23.4326	46.6802	3.14478	1.6836	32.4864	24.2213	107.85	6.93545	3.96988	15.4901	14.0784	10.2362	23.5123	2.04402	7.52476	1.16731	17.7948	10.5341	0	2.79526	1.64598	4.11037	1.21602	11.4667	0	0.995704	0.57265	1.44736	0.1665	8.32347	0.171177	0.30886	0.33425	4.26906	1.15667	11.143	0.163032	0.729815	1.93089	2.1302
Pita_unigene56295	2.8378	6.4472	3.73115	2.81088	9.95101	5.15615	3.42372	3.61041	3.11433	2.30734	6.66664	4.26573	4.23635	1.87994	9.42058	10.9193	2.65754	6.34528	1.12668	1.60381	6.26626	2.57803	2.05263	1.17483	3.73606	2.17141	2.8515	1.19693	1.76734	4.32665	3.13011	2.92778	1.18465	0.513379	0.517061	0.627331	1.66253	1.52709	2.0388	0.115175	0.500639	2.69882	4.78268	2.51421	2.0092	0.824527	1.61506	2.74031
Pita_unigene56291	1.0382	2.03838	0.13647	0.855753	5.39469	0.847481	1.63165	0	0.688145	0.261967	0.646838	0.408609	0.381173	0.232568	3.14993	3.00335	0.92476	1.97071	0.156485	0	1.09326	0.486053	0.888869	0.465104	0	0	1.84066	0.58951	0	0.985953	0	0	1.17242	0	0	0	0	0	0.672665	0.114	0	1.21481	0	0	0.397719	0	0	0.123305
Pita_unigene56286	5.0308	11.9759	6.70187	6.0579	7.20678	8.03158	13.1699	7.59851	32.038	6.78106	6.01836	14.1571	6.91753	8.63225	21.8933	13.3075	21.0606	9.26767	7.72663	8.90228	31.6795	8.41999	14.0787	16.4588	1.6106	0.99246	6.19478	1.43352	17.8915	0.747963	0.894699	4.78086	5.22179	3.64747	7.59914	2.94946	2.63139	2.84291	4.79425	3.15956	12.6292	3.77874	6.58561	3.24053	14.9592	17.7817	21.7623	5.1272
Pita_unigene56260	69.5421	31.6452	2.00038	2.12705	37.5538	22.2713	32.8651	5.82019	40.9173	4.97137	15.1377	5.72924	11.6609	9.69481	101.151	30.1105	24.243	53.7812	3.31639	9.47816	81.1159	49.8722	51.3541	9.78152	12.8688	45.0207	6.80386	234.803	213.883	46.1515	21.7933	57.9066	18.103	270.456	124.536	59.7006	124.951	83.1013	45.6961	254.091	332.14	134.188	3.82638	26.405	7.72988	58.2596	92.7514	29.956
Pita_unigene56249	21.4096	18.2894	31.6118	20.7941	7.30178	8.08208	30.8158	28.9617	16.2694	25.7207	13.7116	13.769	24.5385	28.7887	20.9697	13.5774	8.81672	34.1559	23.6531	18.9276	15.0793	5.75839	19.6969	8.75343	7.62921	19.0145	3.81644	4.55551	13.6077	6.11533	4.09452	18.9896	2.94651	6.76489	12.8609	6.73986	2.96466	20.3314	2.68644	4.56442	7.82908	7.34241	6.21242	28.134	3.1503	12.2027	19.189	15.8296
Pita_unigene56232	1.70222	6.52776	3.91687	4.29764	6.72296	2.85669	2.16958	1.32371	1.29369	0.80713	1.41065	1.48631	1.7328	2.00749	6.85008	2.27684	1.99917	2.46813	0.675843	0.240225	5.18871	1.87889	1.96387	0.634369	2.01755	1.43053	1.45049	1.55767	2.75631	1.37301	1.41026	1.88161	0.931939	0.462556	1.04734	0.225505	0.345461	0.96241	0.366976	0.518288	1.12612	0.347606	0.697916	1.18951	0.963884	1.06276	0.484876	0.561276
Pita_unigene56225	3.01171	2.75477	6.20913	3.63171	2.4213	2.9484	4.073	3.57683	2.34986	1.94198	3.26089	3.3133	4.9214	5.86175	2.47786	2.84936	3.66525	4.33582	0.781226	3.45082	1.34108	1.42362	2.7471	0.733282	1.46587	1.93234	0.884372	0.118731	0.210072	1.70039	0.11645	0.497133	0.263785	0.572929	0.115298	0.89357	1.59744	4.76765	0.727173	0.410814	0.334709	2.75552	1.72875	2.00334	0.71621	2.21165	0.720703	1.7797
Pita_unigene56217	205.091	274.551	127.765	138.212	162.223	200.16	281.569	123.724	245.797	108.952	154.943	216.439	164.637	178.283	327.297	168.384	246.827	280.316	86.6323	86.4861	378.312	122.928	281.482	141.865	134.662	95.6516	195.665	130.575	300.96	78.3929	43.8837	91.9354	123.768	46.7787	127.144	45.1644	50.579	88.681	91.8083	81.6004	116.207	50.6299	95.0339	80.8874	99.2451	79.1788	102.371	55.7408
Pita_unigene56210	17.0738	8.42905	2.38411	5.99718	7.80471	11.6441	2.32271	8.85745	9.81431	4.91251	5.1216	7.19683	11.2984	4.09176	15.4804	6.49813	3.29428	1.84826	10.4721	4.88368	10.2682	1.39165	3.13313	2.96918	5.21053	1.76205	3.56576	0.5804	3.59323	4.87457	2.73258	5.95213	11.8581	1.00825	1.57787	7.64039	9.14642	3.46199	9.35857	0.903437	2.50825	3.92901	1.80241	1.49709	2.45001	0.823933	0.939372	3.26235
Pita_unigene56195	12.2597	9.54501	6.28029	3.72665	16.2521	3.28426	14.7768	7.21236	10.5637	2.41247	9.72492	3.29902	2.52724	2.71271	9.93093	13.6772	1.52353	14.6353	2.14298	2.16965	11.1592	8.93814	4.50682	2.41382	4.22241	4.81982	4.35177	0.456146	0.806715	0.9793	1.78987	2.02834	3.67107	0.22012	0.33215	0.214371	0.657493	1.30803	3.14184	0.394413	0.535595	0.441173	7.96685	5.08934	7.2192	2.42901	2.42236	2.45725
Pita_unigene56191	3.85524	4.28474	33.7079	2.00345	16.4922	5.77432	4.58109	6.28575	7.74273	3.01007	7.67089	3.00349	2.04685	7.97849	7.91188	11.398	5.04408	4.71483	1.78586	8.61878	4.5238	5.56785	11.1018	5.12754	14.0507	4.84496	5.51598	74.2516	43.3031	7.25366	13.8222	5.26393	3.47458	92.9277	16.392	14.1831	20.6318	11.1574	10.4968	49.0147	21.1089	24.4451	8.02779	2.8823	8.53746	15.8836	44.9043	6.3909
Pita_unigene56161	6.54723	18.7731	4.01687	12.8133	11.2606	4.80944	3.28161	2.70064	6.38708	4.86203	5.58822	2.44575	4.56146	1.89547	13.723	8.38794	1.70971	3.12769	0.710735	1.50746	8.40473	1.98465	1.86749	0.948911	7.84761	8.15484	8.71458	1.18414	0.856249	2.87366	1.58436	4.61469	4.53699	0.103908	0.313458	0.808515	1.86186	2.83889	4.61179	0	0.202135	1.24987	5.84623	2.77272	3.99871	2.19909	0.979899	2.42062
Pita_unigene56149	0.214194	3.30183	4.63235	4.78531	13.0844	1.78343	0.905971	2.75671	2.9446	1.01527	2.89736	0.218231	2.34035	5.95263	22.235	9.28814	1.41391	1.88214	0.893172	1.69067	0.894563	2.82472	0.203682	0.465671	1.89613	2.17191	0.688223	0.52839	0.56028	1.20865	0.103693	1.65714	0.234338	0	0.102562	0.0991726	0.101537	2.78667	0.323326	0.182626	0.198397	1.1248	0.614809	3.85013	0.636362	0.281643	2.03069	1.08913
Pita_unigene56140	0.999512	4.47067	4.34286	2.74208	1.47384	2.22616	2.37943	0.651157	2.889	1.53312	1.59451	3.13695	5.10831	3.31353	6.41852	2.77456	8.44393	4.87444	1.08171	2.01382	4.14488	3.17215	2.49895	2.6377	0.749107	0	0.000559809	0.866289	1.33313	0.649885	2.47248	0	0	0	1.00385	2.57188	1.2527	0.610378	1.83843	0.789663	0.493854	3.30839	5.75091	3.005	4.05886	5.01852	7.77137	3.29656
Pita_unigene56137	31.3775	18.3835	10.6631	4.29921	11.9333	34.4322	14.84	15.5704	12.4488	4.80995	54.9539	9.15544	7.67127	19.8369	21.0053	28.3437	20.3852	23.0844	1.4626	9.24117	11.1563	6.88915	16.7318	6.12731	87.8782	62.9302	35.2459	60.8206	110.055	26.6648	117.862	99.5334	49.9544	126.111	105.445	58.1385	41.3397	68.3285	60.1815	49.2969	38.3689	13.7188	13.3042	34.7425	11.8277	23.4526	46.6531	6.77201
Pita_unigene56136	21.5491	53.0109	16.0951	19.6865	37.1865	14.2782	35.4271	23.087	42.4737	21.8077	36.4063	29.8052	38.2783	22.872	58.7901	43.7041	29.9999	43.5447	13.9874	12.7334	57.7812	18.0864	15.6436	16.3869	23.616	26.3225	28.8634	16.1313	21.7839	12.3339	8.77152	21.1543	16.7375	7.33908	12.4631	10.4089	7.69997	23.5558	8.59101	11.8048	8.58175	8.65058	36.1576	29.6962	12.7823	27.3012	28.1588	16.0773
Pita_unigene56113	575.629	538.48	449.141	416.721	443.245	597.402	507.123	321.533	386.525	325.893	302.879	448.885	368.701	255.233	386.311	423.783	317.437	469.85	215.51	110.616	440.679	245.046	296.387	187.511	240.025	166.99	263.239	184.868	215.488	153.392	54.74	110.743	185.697	74.8016	53.8295	35.3019	59.9405	67.159	132.565	81.2817	38.1728	62.3798	219.98	138.708	211.196	182.045	98.3421	141.576
Pita_unigene56105	17.4077	50.7502	9.20181	21.2174	20.8006	26.205	20.8193	12.819	65.8234	19.212	9.11068	21.7385	31.2061	9.74034	86.1228	17.5691	25.1968	19.3583	18.0858	9.5726	84.7324	17.215	23.6039	17.4709	6.44701	6.65226	2.96749	8.0792	25.9544	8.77875	6.16587	3.81934	1.06495	4.55223	8.60929	6.28165	8.27289	4.60461	3.21404	2.11005	5.68134	6.7215	8.51506	9.05642	10.2134	19.8759	29.9607	12.6634
Pita_unigene56098	2.4098	5.36979	7.71683	2.50329	6.35273	6.32948	4.62384	4.6768	4.76867	4.01965	5.58571	5.40306	5.86194	4.43528	5.60992	8.83431	5.66237	1.60787	4.19841	2.37562	4.38514	6.75353	2.47659	4.10786	5.22748	6.36892	9.91394	1.80892	6.2195	3.98704	3.55056	5.96597	7.48067	0.827157	4.89441	2.40765	1.64603	3.05457	1.74651	0.246583	1.16087	1.3825	3.87392	3.66985	4.10312	1.52422	2.88808	3.30107
Pita_unigene56097	45.4216	33.7811	28.2266	40.2108	13.6861	42.0518	38.5007	12.814	74.637	41.1231	12.9537	22.0797	38.4728	16.8423	63.0631	18.691	68.5229	78.7765	16.4892	4.72474	39.0707	7.58877	38.7702	23.3348	12.9664	19.264	22.7833	0.378738	24.2271	4.32533	6.31889	17.6789	37.3406	0.182806	8.0818	4.43374	10.183	27.1848	32.6432	0.735664	4.08499	14.7579	16.6576	38.2846	34.1284	7.57981	47.4875	19.3364
Pita_unigene56090	6.45264	9.10951	22.6952	48.3433	38.1833	22.0024	5.90204	5.74917	16.0086	45.376	6.78726	11.4807	34.061	2.78293	41.981	10.4544	11.0301	8.34912	24.2091	5.85343	11.3489	3.03512	2.73852	10.7607	13.0722	6.77236	8.5096	10.4654	9.60158	3.76723	7.48756	3.08301	2.10625	1.37698	1.4844	4.87045	5.75186	2.38772	9.71542	2.60991	2.67966	3.40949	3.54449	5.23058	9.86466	0.750621	25.4413	1.31184
Pita_unigene56077	2.70388	0	1.7844	0.207243	0.308426	2.74336	0.625924	0.638657	1.57771	3.97052	2.53056	7.38206	1.34566	3.34694	1.14579	3.30133	3.15208	0.290482	0.831954	2.38572	0	1.80966	3.56299	1.41508	1.36468	0	0.8929	5.14234	7.74151	3.47037	19.8707	1.64588	1.5966	171.918	18.4812	17.2726	47.2076	4.93051	26.9631	73.7456	25.5388	17.4079	0.41675	0.785559	0	5.33276	11.3718	0.46542
Pita_unigene56069	8.16194	26.4432	7.02257	3.74693	17.0926	4.45128	4.82292	3.28417	8.39238	2.61202	2.02684	3.94715	3.42297	2.08096	12.8856	5.64067	5.95367	3.18473	2.91416	1.97298	26.5785	3.23614	4.45816	4.89434	13.1364	12.6944	9.92062	6.84424	4.61138	3.88891	1.83448	18.5449	6.19041	1.08275	4.57351	1.41546	1.11115	6.59646	1.4951	1.3602	1.37099	0.689474	1.80971	2.11177	0.802131	2.13889	1.85264	0.717339
Pita_unigene56051	12.6912	5.71612	3.70804	0.534303	9.22178	1.6598	4.84286	5.26561	6.16387	0.963043	2.23534	4.63339	0.570438	3.19972	3.5338	5.99947	1.49401	3.74161	0.158981	1.43592	1.27421	2.65417	10.2895	2.31232	6.06532	8.30413	0.315096	6.43999	5.38404	5.23725	3.7451	21.658	2.52901	8.2669	11.2588	3.5665	10.2579	19.2159	3.45363	7.60541	5.72067	23.2383	1.23093	1.83983	0.339394	1.96305	1.95338	0.317858
Pita_unigene56040	76.8607	303.027	264.965	49.3359	114.578	160.474	116.757	146.337	166.037	80.631	128.345	134.259	79.9105	211.814	192.788	131.831	105.669	109.477	41.2355	193.124	196.81	106.335	83.1328	97.5022	52.7785	238.952	217.072	23.1967	68.5625	71.896	24.1386	88.1049	67.87	7.06443	42.2329	23.3117	58.6045	180.207	109.223	12.9081	35.2948	92.2168	112.1	154.389	140.357	62.0652	79.6852	98.2785
Pita_unigene56034	20.0692	17.9955	24.2601	20.0009	16.7798	26.0499	13.5536	18.3758	21.4708	17.3246	22.1581	27.369	12.2357	19.0931	15.2516	19.238	32.5888	19.5471	14.9779	19.5949	15.2694	17.2915	14.233	26.9681	2.87494	12.1516	40.9017	0.482375	2.52223	8.98411	1.04167	9.19835	20.3291	0	6.70307	11.3965	1.04069	3.2834	21.1183	0.870691	0	10.1165	0.314326	13.6635	23.5856	0.49602	13.7265	6.63077
Pita_unigene56031	97.1465	236.148	111.96	160.864	277.927	143.68	122.749	130.674	231.62	163.301	256.211	229.394	195.688	109.349	321.779	327.664	145.182	135.906	112.362	71.1557	334.406	152.981	67.6684	108.14	95.3096	66.0647	120.756	28.9747	49.0307	44.5178	37.7448	38.4882	88.2086	8.36179	24.0841	29.0345	28.2128	47.074	67.4109	16.3322	28.5124	32.9328	259.717	130.448	116.999	139.979	89.5946	101.97
Pita_unigene55983	407.209	248.956	348.999	428.021	524.104	451.648	533.749	362.344	245.018	256.073	229.555	475.934	479.186	582.962	645.235	606.219	493.547	515.053	424.294	822.418	713.566	534.766	640.458	422.135	166.602	120.941	499.947	267.239	272.929	293.946	64.7499	64.2127	245.984	136.697	210.824	115.535	89.0022	70.2196	203.976	209.997	187.517	257.285	432.886	207.372	510.027	236.371	254.91	536.639
Pita_unigene55982	3.35932	7.94684	5.13157	0.814976	6.27098	3.79619	4.04478	7.51936	3.95559	1.08408	0.789346	2.87176	1.72177	10.2275	5.97022	2.33795	3.2135	5.77523	0.779609	24.0569	7.12599	3.90585	4.20643	2.64265	4.6884	4.43029	6.31392	33.8121	9.54032	1.76049	6.13502	5.65267	7.20531	19.9982	22.8089	8.95846	4.90082	6.32823	3.60139	5.62213	17.2921	2.59897	3.41902	3.06112	5.60712	4.68819	4.69622	2.19996
Pita_unigene55972	92.6605	63.1981	56.4727	77.9308	46.2331	67.3254	96.3524	39.331	44.5228	58.897	30.1885	58.1865	67.0093	32.406	53.2447	28.2751	59.4356	84.1922	49.5173	21.2915	61.1231	19.7804	45.5287	32.3333	26.0282	13.0504	19.3367	13.825	17.3806	13.1644	10.851	10.9932	9.45702	7.3879	15.9399	7.20805	10.5476	8.45095	7.36467	8.20172	9.93189	8.68087	12.3451	10.265	9.94675	10.7869	8.55135	11.7163
Pita_unigene55965	14.8405	16.5922	19.948	10.4102	20.8144	16.7636	12.2622	15.0395	13.9582	7.18965	13.3128	9.60779	6.37711	6.40582	27.4052	7.21214	4.97082	10.0336	3.01601	5.19841	6.29764	4.75381	2.84306	3.59623	82.172	49.7745	27.3484	124.947	44.6862	32.9542	153.101	99.3647	44.7241	96.2267	98.7976	72.7173	17.7779	21.8041	12.6972	15.3775	12.1826	9.69393	3.89154	5.47571	6.49901	3.05471	4.951	4.21557
Pita_unigene55958	0	0	3.12868	0	4.33451	0	0	2.29416	0	0	2.56483	0.133068	0	1.68118	0	5.26685	0	0	0	2.15284	0	4.81002	0	0.213402	0	5.46741	4.33343	5.12345	5.14591	5.83462	0.230681	5.77507	4.48948	5.20784	3.54432	4.98017	0	4.53307	4.36976	3.79812	3.6469	4.32383	0	4.52829	3.79889	6.68719	4.19166	4.2447
Pita_unigene55957	10.1926	2.37961	3.47729	4.35477	3.67823	5.03607	17.3455	3.24035	2.57703	11.5737	11.3639	13.5045	7.57143	3.68799	3.09854	12.0625	10.4571	14.1739	7.51069	2.38987	1.50556	7.68726	13.066	8.40528	3.17816	3.63509	2.85453	1.87163	1.1187	8.3014	3.72481	5.7395	1.6269	3.09833	1.61865	3.98596	4.39449	5.42984	4.41996	3.45512	1.75147	4.54502	7.89636	6.30852	2.46932	6.44398	4.67277	3.77497
Pita_unigene55945	2.85235	25.3017	14.9267	19.67	25.1543	31.6182	9.08314	10.6147	20.2059	9.84704	3.24141	16.8768	13.7989	17.4784	39.4564	5.74682	16.5042	9.747	6.75949	6.73031	53.5546	3.98547	5.13904	17.0409	13.9001	15.2637	23.1958	13.3124	6.80107	7.91277	0.986889	9.60783	10.5763	3.57775	4.07426	4.09237	2.41072	8.18814	6.45012	3.56921	2.64342	4.50629	4.06493	3.45429	5.82723	7.57081	1.71348	4.29846
Pita_unigene55942	68.6127	5.29926	5.29988	10.749	11.8368	15.5261	51.0702	5.83042	5.90891	12.1953	0.357349	15.0016	14.4272	12.9922	6.44216	0.585056	8.99484	79.7436	7.37096	2.36347	5.829	0.169231	30.9693	5.88364	8.23006	1.71831	1.6744	7.26497	3.50064	0.466463	0.123276	0.386487	1.04221	3.30197	1.53463	0.113854	0.236299	0	0.124395	5.31651	1.97218	0.210583	1.21848	2.88521	0.306016	15.0044	2.31256	0.407984
Pita_unigene55933	60.0095	108.548	231.014	375.67	125.931	114.691	62.5526	78.9028	44.0607	53.0385	51.8541	49.5343	122.695	155.882	103.757	77.8835	213.977	126.096	121.548	27.2833	50.6802	27.5093	72.1335	34.8952	85.0512	19.3488	56.3802	3.51232	109.857	6.485	60.0937	13.8248	51.6443	9.83319	18.2486	9.14866	223.524	33.4701	184.087	4.88846	21.0756	65.242	49.1306	12.9275	16.1701	59.4209	30.2885	22.4515
Pita_unigene55931	14.2498	36.6207	12.7159	68.959	40.8637	50.8848	17.6723	13.1937	28.1738	56.9132	34.3076	39.4926	73.4538	11.8723	52.4426	48.0462	20.0804	18.9291	40.1891	14.2338	67.0149	52.7796	7.18861	23.0352	34.6594	3.90043	86.5307	3.64674	9.0665	7.54574	8.30227	2.1587	46.7898	2.40373	19.6067	3.33817	8.16548	1.45619	26.4557	1.4451	9.22881	6.51332	17.6338	3.54533	38.7084	6.32607	4.71002	19.7556
Pita_unigene55930	0.814867	2.14406	3.05177	1.57042	2.01321	0.457376	0.548942	0.288413	0.258455	0.385932	0.168456	0.593856	0.221347	0	5.53565	0.401534	0.680984	0.217179	0.269898	0	0.108221	0.0530528	4.72084	0.10129	1.09607	0.246808	0	0.0576915	0.304672	0.163855	0.11335	0.420108	0.0634534	0.111428	0.0558526	0.107319	0	0.197906	0.234612	0	0.215784	0.503661	0.11143	0.0566147	0.230096	0.206223	2.85671	0.108206
Pita_unigene55924	5.13494	12.7242	7.03255	6.74944	7.55307	8.57513	9.52513	10.1215	15.2014	12.9164	5.00872	13.9714	12.8017	9.74443	13.7203	9.10913	10.0637	11.9242	8.83671	5.60655	12.5714	6.96902	4.68243	9.63123	4.42423	5.38216	3.56813	6.9001	4.18123	4.06877	4.50064	8.76559	5.16217	6.33593	7.55579	5.94315	6.18703	4.20344	3.33479	2.82365	1.6922	4.49904	2.56691	3.10746	4.1161	4.09457	2.28616	3.92505
Pita_unigene5592	46.4734	123.655	31.7416	46.3103	33.1739	55.3571	48.4788	32.3521	115.732	64.4258	76.4994	74.2837	58.1305	26.5941	102.391	59.0392	73.8418	38.4048	37.0765	16.248	103.104	52.0872	48.4348	66.5391	27.7002	23.7869	96.2245	5.23365	25.1699	66.8308	23.7282	20.3562	75.1887	3.66123	20.6624	18.4397	27.4871	18.9895	94.4482	23.7111	18.7371	40.9189	70.4501	28.1412	103.415	78.3292	61.1347	28.1469
Pita_unigene55919	0.782452	2.94924	0.873958	1.27588	1.29938	0.713775	0.790793	0.609304	0.99276	0.741147	0.595672	0.513243	0.797064	0.193808	2.35718	0.826216	0.607565	0.73019	0.518348	0.10983	1.14317	0.101896	0.373375	0.291794	0.247658	0.651521	0.35982	0.0554093	0.536369	0.367079	0.0544362	0.633901	0	0	0.0536365	0.0667174	0.0531678	0.380102	0.0580618	0	0.155406	0.161265	0.428002	0.869614	0.607533	0.148591	0.671903	0.311789
Pita_unigene55911	173.365	209.414	172.008	118.073	254.705	239.695	91.9214	82.8942	94.9459	45.9911	64.9935	85.0699	37.8279	92.3856	108.08	85.3776	78.7521	78.6313	46.7707	88.2547	124.852	102.332	112.808	106.979	397.585	313.512	236.44	754.271	427.231	307.032	232.313	373.828	169.997	270.349	294.655	251.123	82.2207	66.9841	42.092	118.004	121.535	79.338	57.4354	55.1104	61.5042	63.4901	83.6441	71.6166
Pita_unigene55743	0	3.40112	3.94299	1.78879	8.12547	0.626636	2.60458	1.48116	7.57272	2.03451	5.19227	3.04505	2.44077	5.04398	5.72531	1.05452	9.15291	2.14655	0.198117	0	0.396422	0.390179	1.41825	1.30069	2.83731	0.695202	0.588538	0	0.373364	0	3.07718	0.897552	0.945707	0	0.408667	0.400021	1.40821	0.963769	4.74584	0.182335	0	0.604926	5.12558	14.1365	1.06376	13.9937	13.173	0.587787
Pita_unigene55730	37.7077	27.7839	41.3477	19.6403	32.0339	20.6534	35.4896	14.6435	13.2178	8.34148	26.5505	16.0652	10.7801	16.5551	19.5423	17.3916	5.26025	26.2503	6.12554	22.7878	17.3153	16.6399	21.8109	12.8265	34.753	43.8706	46.3076	58.3569	45.4917	30.6856	27.7152	37.2817	28.2281	31.3554	24.2626	36.5671	40.9471	50.9872	39.2017	46.0767	59.0711	35.2588	21.5811	28.2074	39.2594	11.5953	24.4692	19.9249
Pita_unigene5573	0.990715	0.90391	1.47173	1.20277	0.421283	1.97289	0.218651	1.84164	1.11959	1.07854	0.37782	1.08596	1.51316	1.56238	2.1076	0.662662	2.35208	0.337811	0.29676	2.04025	0.591946	1.60322	0.605208	1.77431	1.88971	0.650229	1.58012	8.01223	3.93577	2.94164	5.12901	1.61097	2.70493	12.7923	4.45503	4.81022	5.87062	2.96002	8.73617	6.64075	3.70111	2.34941	2.08313	0.104954	1.47581	2.27822	1.85237	1.21097
Pita_unigene5572	3.21451	1.20035	2.42242	1.68468	0.838484	0.393409	0.377069	3.00876	1.06904	3.45773	1.17448	0.815465	2.50809	4.7802	2.82499	2.13569	2.047	2.37773	0	6.08489	2.03542	3.80215	2.66025	1.18625	6.7732	1.32391	2.59332	15.8802	8.02662	7.21734	19.7453	10.1156	6.1887	28.1039	14.9921	9.83894	5.69654	3.60351	14.3156	8.13727	4.95259	5.07263	1.72666	0.396858	3.40935	1.70496	2.69827	2.91208
Pita_unigene5571	7.47041	8.71597	5.52558	6.64387	6.46643	6.38199	6.93455	5.90708	9.97964	11.7287	15.8183	10.3173	7.82113	5.27263	7.13145	11.0304	7.85278	4.51113	7.73003	3.5034	7.0284	8.50783	5.33427	6.75931	7.90624	8.0806	5.64771	0.196696	2.02503	4.29968	5.70956	5.42762	3.65279	1.00106	2.43782	3.34717	6.59633	5.96354	4.6102	1.68046	3.34062	6.75996	13.7993	7.58121	4.26483	2.8764	4.41437	6.07318
Pita_unigene55671	3.07507	2.15351	0.930843	1.38029	3.41306	4.59424	2.47374	0.71461	1.92064	1.37057	0.978442	4.08875	2.47058	1.63363	4.86101	1.85084	6.49541	2.81889	1.2045	1.144	2.00949	1.22436	2.78042	5.59109	6.28931	0.619938	1.06018	9.89032	7.61996	1.90547	10.725	2.68313	5.86061	15.2585	13.4017	3.55809	5.09986	3.2642	3.41716	9.50259	7.62782	2.00197	3.1069	1.27422	0.59931	2.55347	2.66293	1.11541
Pita_unigene55665	0.301464	8.68609	22.4088	13.6386	8.23058	6.21764	35.9797	23.8567	13.7533	24.4508	51.3087	4.60235	14.7448	22.3488	9.6927	15.2933	7.50683	39.807	10.1921	1.64178	1.39729	5.88392	23.7309	1.70319	9.325	10.1955	7.72473	0.888772	6.26434	1.27818	3.92044	3.42112	7.43895	2.2868	0.864648	0.840791	9.45033	5.2771	29.7014	3.33955	0.837662	1.71665	5.47768	29.9947	5.97799	53.0624	46.8411	3.56217
Pita_unigene55649	13.6202	22.0045	17.6164	9.85224	9.45447	18.2922	13.1341	14.2826	17.2094	17.2429	11.4124	32.8168	13.9449	10.8966	28.5714	3.69742	4.38392	10.8165	19.6783	8.38142	36.9613	9.29578	17.2597	17.5043	5.51579e-07	7.67269	0.924602	3.51149	2.31712	3.5843	18.1354	0.0663664	4.92866	0	7.22888	2.641	8.34178	3.72633	9.29098e-06	2.85745	3.33816	2.45137	17.2998	7.12118	13.5771	7.6845	0.259274	2.90941
Pita_unigene55621	0.123023	0	0.452892	0	10.939	0.120427	0.115522	0.121754	0.218159	0	0.47579	0.125305	0	0.213826	0.330027	2.42485	1.61765	0.226974	0	0.121548	0.570636	0.559092	0.116874	0.106977	3.40225	2.10558	3.27376	12.849	1.39443	1.73669	0	1.14225	3.36785	1.28686	0	0.798613	0.116499	1.66916	2.59906	1.3634	0.113939	1.64081	1.52999	0.240749	0.365756	0.537505	0	0.22712
Pita_unigene55614	2.40193	1.49581	3.0966	2.44908	6.69843	2.64812	4.76722	2.27913	1.08707	1.60294	2.42237	2.5205	3.44129	3.0232	1.94737	3.77829	3.46584	0.974921	1.81999	1.83992	2.78322	6.17425	6.14815	3.6348	3.35321	0.229976	4.86266	2.07099	1.79495	1.72573	2.59691	1.34829	1.50229	2.11099	2.05438	2.38985	0	0	1.39657	1.04565	0.666599	1.22283	1.18188	0.372561	1.29717	1.09037	0.999535	1.37367
Pita_unigene55600	161.013	211.193	92.4619	66.9388	139.9	209.208	244.396	472.778	380.299	205.544	282.07	421.991	269.322	975.641	522.387	431.895	427.159	342.297	298.028	1398.82	624.495	480.794	302.121	568.072	601.422	233.527	181.715	1172.03	757.804	264.225	1363.36	609.914	405.782	2136.15	1862.28	1451.09	1433.8	695.48	401.047	1972.48	2578.12	1101	873.401	483.783	368.571	813.739	717.564	726.886
Pita_unigene55575	4944.84	2361.73	2627.82	2897.78	4193.65	1092.45	4408.03	1799.34	1894.46	2476.01	3612.9	1219.23	2358.84	1346.17	1620.85	4187.05	967.181	3914.19	3625.19	1895.76	2628.98	4896.6	4754.67	1421.59	2126.9	1714.55	1691.12	128.213	821.892	1753.03	1444.58	986.664	815.537	67.9576	329.107	1023.65	1335.75	1182.5	573.542	63.277	360.941	1189.86	4510.58	3408.52	1858.8	848.328	1214.41	3865.01
Pita_unigene5557	34.2765	43.8972	29.5621	34.2704	20.4275	39.4608	47.8208	32.4592	37.6046	38.338	37.681	35.76	46.6021	54.1041	44.0842	27.1309	55.19	55.1566	20.5958	33.1195	32.2827	23.2644	32.5051	20.9823	16.7773	15.2685	17.4977	4.15962	9.61818	24.4469	9.24769	4.66421	6.58382	0.98519	7.83473	9.08789	12.2091	12.5784	19.4158	2.63913	6.02853	28.3664	51.1803	18.9465	18.9941	30.2902	21.2632	30.6812
Pita_unigene55558	0.151392	0.357495	0.786489	1.64219	1.96257	1.03532	3.24703	1.03256	1.59459	1.40376	1.25256	2.18766	0.545629	0.601401	3.51606	2.065	3.77554	1.69793	0.145689	0.350709	0.333999	0.142343	1.29193	1.79418	0.625206	0.423093	0	0.966396	1.59841	0.142546	1.4644	0.390399	0.101708	0.259101	0.131799	0.473494	0.829041	0.149894	0.53732	0.294419	1.53797	1.00741	0.833039	0.865227	1.39394	1.67989	1.53018	0.797749
Pita_unigene55555	2.59392	2.74321	11.9135	7.36405	11.4555	6.62141	3.04836	3.68142	1.7439	5.62674	2.48708	2.66164	2.94572	3.67243	3.75316	7.67954	2.13113	3.56292	2.31618	1.44929	2.07648	2.59403	1.52817	1.65252	4.42578	0.694043	0.864623	1.56658	3.72812	2.29203	0.935394	1.38778	0.698964	0.523702	1.42256	0.504258	0.140318	0.145241	0.566927	0.546782	1.33536	1.1792	0.747785	1.27468	1.59658	2.72129	3.74773	1.82407
Pita_unigene55549	25.0892	2.39861	11.681	6.61224	7.18147	9.91593	8.3915	3.1282	9.32857	6.01339	10.0794	2.39597	7.88708	9.72243	5.92673	11.8371	6.75281	21.4843	3.30209	4.01733	5.28435	10.0034	9.11097	1.24358	4.29308	3.19859	4.31186	0.677156	1.40359	3.96902	2.08124	8.415	6.26223	0.0499174	0	4.00853	3.72384	10.8198	1.5476	1.38673	0.856924	7.71875	4.34049	8.02315	2.32816	5.4336	1.93378	11.0693
Pita_unigene55535	1.16	0.848233	0.740825	0.450057	1.26526	1.5223	0.759338	0.587267	0.385081	0.496085	0.239086	0.952992	0.647835	0.483449	0.847642	0.533692	0.662933	0.51975	0.721316	0.75776	0.538673	0.589862	0.295483	0.855302	0.617545	0.131411	0.544947	0.184144	0.162128	0	0.241179	0.191637	0.405325	0.237103	0.0594369	0	0	0.0833885	0.187259	0.158568	0	0	0.474383	0.482232	0.632228	0.164483	0	0.0575594
Pita_unigene55516	0.455172	2.96289	2.12099	1.0163	1.51782	1.10478	0.309679	0.481502	0.290837	0.925626	0.204767	0.334131	1.06794	0.565876	4.66358	1.82459	0.555104	0.824988	0.591315	0.386821	2.40029	0.298857	0.313352	0	0	0	0.614584	0	0	1.16594	0	0.406688	0.355006	0	0	0.0558137	0	0	0.153034	0.0518117	0	0	1.1911	0.677103	0.658983	0.293399	1.03582	0.735757
Pita_unigene55493	31.7274	109.05	162.315	235.512	331.779	204.082	92.1437	55.703	34.0388	99.1634	41.5942	93.6294	67.1586	43.3156	308.804	86.8387	55.148	93.1047	12.4194	19.8655	65.6676	6.86825	28.6939	28.4146	82.6122	9.25545	15.0976	8.82478	33.6844	133.496	8.36331	7.66984	11.61	7.28393	3.49911	22.83	9.81082	3.85854	9.93127	3.63642	2.82188	49.3576	13.1749	5.60394	37.9216	9.03203	21.1411	26.3279
Pita_unigene55491	27.4177	18.3851	24.5402	14.0552	0	5.40425	9.97989	7.45948	11.2715	8.20127	0	0.757728	5.99183	6.093	7.11784	0	1.30766	8.03739	7.3194	3.81724	17.7555	0	27.5497	3.1386	1.99208	9.17978	0	0	4.09934	0	0.968739	5.23183	0	0	1.31152	0	0	2.47109	0	0	0.531005	0	0.193015	2.42598	0	0	6.32863	0
Pita_unigene55476	10.488	1.86374	7.61161	3.92753	0	1.85981	2.45967	10.3028	5.9807	13.6061	7.67069	10.2692	13.183	1.64648	9.30816	6.99727	12.1084	4.01262	5.89139	10.5175	1.04	18.3625	33.6253	11.3842	3.30693	4.11141	2.41785	44.1273	19.2381	14.2239	38.3201	15.0068	2.48226	43.1986	7.85878	17.6121	57.4663	12.0602	57.746	43.2731	30.5779	15.8268	12.522	4.81478	19.5558	26.1186	39.8312	4.75751
Pita_unigene5547	0.593607	1.24784	1.87615	3.3459	5.82487	2.77406	0.957385	1.04254	2.23645	2.91205	1.27459	3.01342	3.83359	1.11113	3.83561	2.56303	0.684189	1.55661	3.02466	1.50382	3.67941	1.9124	1.97194	3.15242	6.99467	3.76428	0.391476	18.7776	4.17722	2.70396	6.95077	5.89188	2.90539	20.4627	5.84644	6.06106	5.90807	5.19084	2.38693	12.691	4.84579	3.73061	0.697807	1.4634	0.338008	2.12019	2.79318	3.34119
Pita_unigene5546	1.53207	2.54681	2.55399	3.80335	5.74959	4.82088	2.26046	2.05591	3.20898	3.40539	2.27353	2.79123	3.65428	2.37431	6.35467	2.52614	3.84947	3.28888	1.83421	1.73874	3.29158	2.60198	1.49789	2.78593	8.88917	4.49735	1.00783	23.9975	8.71981	4.19121	12.5436	6.70136	1.98721	19.2715	10.9164	5.82843	7.16539	4.25006	1.51045	15.0544	9.75602	3.91256	1.9244	1.69096	0.379618	3.30057	5.48661	2.71163
Pita_unigene55439	0.740336	5.16235	2.19249	1.65394	6.52422	0.92364	0.70573	3.46566	2.70779	0.380237	1.1768	0	0.307079	3.77301	1.8724	3.302	0.850213	0.951102	2.07598	3.5952	5.92446	4.728	0.347698	2.12526	7.37853	7.34284	0.678082	9.52003	13.4935	5.60269	7.51771	13.0437	0.39012	11.3303	11.0524	10.8913	4.3391	7.58993	2.03313	9.34647	14.968	5.03045	4.67005	14.1682	3.00618	6.91331	13.3106	8.92646
Pita_unigene55414	1.61205e-06	4.87472	12.634	9.10699	11.2761	15.1581	5.72264	9.73977	8.58747	7.366	10.0883	14.684	9.11881	10.4313	10.1985	16.7398	16.203	1.17762	3.0331	4.71077	2.2509	6.65755	0.667125	8.98748	2.41154	2.63991	13.7791	0	9.89544	9.15702	2.71165	0	7.96269	0	3.93814	1.26167	0.609571	1.84716	16.5119	0.649991	4.91838	12.059	1.83789	0	11.1128	0	8.99137	4.96705
Pita_unigene55413	0.622046	3.23315	2.94222	1.50663	1.16463	0.614292	0.195398	0.616294	0.449252	0.392845	0.138338	0.429184	0.656984	0.899154	1.23944	0.476771	0.407557	0.325578	0	0.203948	0.0642292	0.12593	0.131794	0.180387	0.999812	0.440258	0.762435	0.410596	1.32629	0.194673	0.42012	0.570167	0.226216	0	0	0.255121	0.0656912	0.163827	0	0	0	0.0663439	0.198454	0.269186	0.341701	0.06347	1.1797	0.0641636
Pita_unigene55397	2131.14	1530.71	1217.33	970.035	2305.54	2988.19	2278.36	1203.38	953.042	1048.32	2635.08	4549.78	1286.94	1073.16	1137.58	2487.04	2417.17	1953.77	917.576	849.215	1559.31	1934.61	1990.82	2838.97	996.455	615.505	1954.49	583.196	1913.57	604.476	403.848	610.529	1391.1	502.971	953.538	271.129	923.422	517.924	1033.83	559.794	1119.38	406.254	1566.68	1287.63	1844.89	1272.8	1593.14	643.884
Pita_unigene55362	5.38613	1.50109	2.69894	0.174076	0.0834188	0.20855	2.91943	4.31703	6.84328	3.81205	2.67028	2.39282	1.51343	0.509096	2.85366	5.28597	1.18277	0.389192	0.155398	1.56838	1.40126	2.36563	23.336	4.22874	0.556706	0.891708	2.15609	4.06093	2.77753	2.28377	9.27561	3.28488	1.00697	9.76257	2.57082	6.89333	5.65065	1.99288	14.0562	5.37765	2.87093	11.32	1.6043	2.90619	10.3691	1.27838	15.7519	3.41827
Pita_unigene55347	47.8593	66.9085	67.5649	84.4724	114.035	61.0706	36.9374	89.5902	59.7245	93.7105	117.875	61.2786	103.633	80.9523	69.1657	174.336	73.6621	41.7383	67.702	53.8669	61.7492	70.3429	27.952	33.6283	115.553	101.494	53.6156	24.4672	24.3718	19.5437	81.5379	53.34	41.2439	8.15065	24.4505	10.1583	28.0822	72.0163	27.8045	19.0513	7.13628	17.8646	164.589	93.1874	39.8071	75.1828	32.3855	36.6984
Pita_unigene55337	9218.15	7532.23	6654.71	4699.94	22535.1	3943.12	11343.3	2832.1	6176.76	1431.42	12163.2	3625.03	2301.43	1714.31	4674.27	15265.5	4194.09	8062.36	738.155	402.697	2485.5	5292.53	7045.43	1700.11	3484.16	2485.25	5269.88	5228.79	4860.05	4432.05	630.344	1844.64	2330.55	1645.08	5927.31	1611.42	1202.83	1190.32	1820.94	1625.84	2341.43	1528.83	877.764	1101.89	1602.02	1570.45	1054.89	1040.82
Pita_unigene5517	0.602855	0.206358	0.724923	0.212509	1.25534	0.129536	0.166376	1.55337	0.154129	0.246714	0.464829	0.198766	0.158657	0.901311	0.405262	1.1073	0.104979	0.348183	0.292698	1.52238	0.243582	0.638951	0.441473	0.267464	0.809185	0.481466	0.780635	1.20066	0.447633	0.597712	0.945684	1.23891	2.28559	1.1665	0.600077	0.880541	2.49618	1.18569	2.99624	0.93504	1.06078	0.926426	0.506493	0.4262	1.35089	0.0576763	0.353533	0.549281
Pita_unigene55169	15.8031	19.7104	6.42054	24.33	3.08622	22.7121	2.74936	17.9201	14.8501	28.6603	17.2485	24.2376	38.3373	11.0634	0	9.22351	21.1234	0	23.68	3.87221	0	19.1409	15.4418	57.1303	8.8357	10.2607	14.4865	0.998065	3.44303	11.4753	6.28001	6.17108	13.3669	1.81883	0	4.69443	1.78917	17.0299	23.7934	2.47668	7.19029	12.637	5.57437	15.8314	12.9963	14.9444	6.495	5.24316
Pita_unigene5511	1.37135	0.881169	1.95303	0.596561	7.88268	0.956796	1.33645	0.833263	0.786042	0.586576	1.23716	0.316068	0.0841348	0.805059	1.54926	2.61606	0.0371077	1.03422	0.205188	1.04222	0.987511	1.73501	0.718351	0.154001	3.18652	1.91912	1.26182	3.24919	3.59008	2.69646	2.80467	3.23829	3.27623	1.31462	5.26705	1.54785	2.10583	1.80597	2.22993	1.09492	5.29023	2.6	0.974092	1.03135	1.17972	0.314448	4.70231	0.700177
Pita_unigene5510	3.35396	1.15482	2.29832	2.47278	0.88914	4.79329	0.770138	1.24665	0.232647	0.449062	0.566166	1.01355	1.19771	2.32863	1.03239	0.743188	2.5898	1.28181	0.490245	1.28354	0.714514	0.58212	0.49519	0.333737	6.11909	2.61076	2.96424	0.977268	5.22056	5.8019	4.67056	0.807427	2.85996	1.96456	1.7114	1.81644	5.1209	1.85162	4.55679	1.89346	1.7819	2.90277	1.88209	1.16336	1.24611	1.4168	2.99843	0.384638
Pita_unigene55078	4.50746	4.48843	7.75909	6.69767	13.3536	9.38453	3.60529	9.93848	8.48961	6.13448	8.68371	11.7381	6.65197	14.666	12.426	8.1833	5.41228	6.6637	3.55583	19.8816	8.80582	6.97212	6.37388	11.128	18.2339	14.6823	8.32901	43.4443	15.1203	15.1109	31.1634	31.7664	19.8767	64.5954	61.3306	52.1773	19.3775	15.1415	22.5832	38.5324	23.0112	12.5891	14.6973	11.9788	16.6702	10.2331	14.3047	15.4105
Pita_unigene54957	11.4892	2.98117	3.70536	5.73777	11.4533	9.73747	4.2069	2.4326	2.21001	1.90795	1.94313	3.03092	0.944564	2.63774	5.29016	0.978578	6.59771	4.82998	1.38216	5.48569	5.97922	2.7097	2.29947	4.75273	13.7149	8.1996	9.2202	87.2583	32.5692	3.77561	21.4176	7.62844	7.15195	98.199	56.7685	14.5052	5.42019	1.088	3.44993	14.3552	14.2807	0.934222	0.950212	1.47229	1.49409	1.68675	5.85126	1.79191
Pita_unigene5488	19.3705	17.412	5.19677	10.9428	7.32922	6.60836	11.2186	6.82626	12.7603	15.6465	13.9619	10.3771	14.4269	6.20357	13.4729	15.5906	7.92341	10.6994	14.5225	5.07458	11.2568	6.81861	5.13599	5.57178	5.06694	5.75764	4.20677	2.56107	3.75565	4.69473	3.87917	2.82945	3.63575	1.90655	3.30513	2.77682	4.19791	5.67251	4.50102	3.39772	3.98986	4.71092	6.54151	5.54544	4.51924	5.53401	4.90626	5.40439
Pita_unigene54850	85.2938	79.4983	5.34227	45.2536	58.0549	129.576	64.1606	15.4402	47.4006	44.6112	54.408	196.431	56.9453	12.5746	70.2812	92.6739	153.534	61.8677	71.9489	2.82666	83.1458	61.0968	22.5069	161.964	19.6212	1.01469	28.1706	13.9775	8.35221	9.70608	2.73998	3.81539	14.7218	5.30497	5.40905	6.99567	6.57815	4.92322	10.0161	7.23965	1.74481	5.27496	37.8309	6.46494	46.5804	82.4997	20.7712	30.7125
Pita_unigene54713	3.08096	16.1503	3.56943	3.97774	12.6168	10.4543	0	19.1209	23.5932	3.67107	9.59999	6.22868	0.720372	49.9419	98.0154	15.7524	8.14698	9.85602	0	19.0451	15.3954	4.8575	4.10243	3.98076	60.2081	8.28274	15.624	400.364	114.001	17.2011	216.631	65.0465	60.2915	1053.45	482.067	149.765	130.324	34.7969	43.7872	330.163	196.221	57.8446	8.73805	2.2505	12.2383	14.7128	36.0335	20.2959
Pita_unigene54658	6.2374	10.0376	0	5.51804	5.00542	7.95045	7.6353	0	34.3815	28.3819	25.1974	8.73111	32.7073	0	24.1623	17.8943	28.0019	21.5723	6.19796	0	7.51203	3.47738	5.31729	8.30959	2.10941	0	0	0	2.08536	0.453129	2.28822	0	1.05653	0	1.36486	4.04602	0	0.524113	0	0.811217	0	8.09215	3.65447	2.36209	1.43767	6.08277	17.827	11.2123
Pita_unigene5463	0.207064	0.704476	0.0695669	0.188235	2.09025	1.01785	1.17795	0.405948	1.26134	0.230765	2.57358	1.52676	0.330531	0.0923802	1.00726	3.11886	0.990412	0.391427	0.0732548	0.254272	0.982494	0.923106	0.202238	0.938811	3.24255	1.63696	1.97908	0.953346	1.82188	1.9894	5.01363	1.63892	3.18826	0.846045	3.00475	1.42655	3.28876	2.39358	4.53262	0.727375	2.40522	2.45167	2.73838	1.65775	2.36556	0.881381	2.2149	1.70009
Pita_unigene54600	32.7027	40.2492	21.276	20.5402	24.4431	26.0264	8.32284	23.03	18.7246	10.2923	18.7664	14.277	27.5133	49.9889	34.7329	37.8224	29.4318	26.1681	5.1031	21.3389	11.5264	18.6998	9.42675	16.3715	22.3848	45.9492	29.662	6.45005	14.873	84.6524	4.26955	4.58338	5.85492	1.17691	4.07561	20.5403	47.2497	56.3259	77.5377	36.1978	55.1265	102.37	19.713	12.0448	22.9219	24.1311	14.6488	31.6591
Pita_unigene54593	13.1901	12.3668	16.0124	11.0605	8.64152	4.05575	8.48359	5.92171	4.67835	5.76402	9.54903	11.4791	6.45321	4.63818	4.01228	7.03523	8.01995	4.03526	4.88017	6.80285	10.4576	10.605	4.58083	8.50578	8.72852	7.85716	6.25193	0.733668	0.656096	3.21815	0.720219	4.64658	4.57839	1.0598	0	0.354047	2.43611	2.09056	4.5249	1.59982	0	2.47616	1.43912	6.70495	5.26137	2.56233	1.85417	7.85772
Pita_unigene54449	2.28699	3.41261	11.2732	4.39648	16.6841	4.10402	4.6486	7.86325	3.38079	4.00911	9.65741	4.64299	2.90098	8.37502	1.35272	17.9795	6.0066	5.77993	7.05298	9.17454	2.46851	14.541	6.76888	7.60988	12.6162	25.9438	17.2218	7.04872	14.9359	10.4927	9.47081	39.1431	23.1642	7.85968	18.8902	17.1972	6.68322	24.9342	17.9115	3.88288	14.141	6.07958	6.54822	21.1092	16.347	5.50509	12.7519	12.0932
Pita_unigene54394	12.3131	6.77234	5.36621	2.52048	8.86745	7.5199	8.67133	1.35803	12.8308	6.10616	13.5672	5.47867	0.171862	0.0134907	1.10911	6.10818	0.279702	9.12693	7.55057	3.59673	17.8209	8.00664	12.675	14.221	4.71536	9.49078	1.76268	17.335	6.89852	0.927435	7.9552	6.7571	9.12993	8.26281	3.32479	3.22795	8.05424	12.5216	14.5277	12.0548	9.35389	15.2889	7.34257	3.73739	20.9585	6.13833	10.8879	4.67386
Pita_unigene54376	3.05157	1.21379	7.04341	13.7494	0.632765	0.895076	2.28843	1.20546	0.270671	0.873338	0	0	4.93988	2.94316	0.815217	0.300833	0.970669	3.29373	6.50645	36.65	4.23954	0.553891	12.0392	0.264968	6.40354	6.33661	8.69569	137.114	23.958	3.76169	3.20981	18.8763	2.01893	139.668	9.31749	7.44306	28.1895	13.3217	3.36907	27.2429	47.5609	8.90131	2.04417	5.73924	8.82786	0	3.61647	2.78184
Pita_unigene54308	0	0	7.92265	0	0	54.99	1.45138	3.70702	0	0.740648	4.47047	33.7427	0.72642	12.2564	0.677548	2.2697	51.052	3.30627	0	3.07534	0	0.699775	2.0658	31.4485	25.3084	258.88	0	62.9913	51.3628	121.974	28.7849	314.469	0	71.9827	65.6979	166.69	49.405	303.221	1.49732	59.4662	44.0033	222.408	22.0193	206.461	0.771658	32.2495	23.7145	128.858
Pita_unigene54215	2.92729	4.58491	1.65737	6.58427	8.9885	2.82355	3.52713	1.1621	5.82008	5.97595	1.61156	1.98732	8.01698	1.00263	7.55515	4.25355	2.33721	4.07509	1.61145	1.10942	6.71796	0.880324	0.979926	0.92917	4.16901	1.91501	4.24881	0	0.146782	0.190598	0.789115	0.177059	1.38209	0	0	0	0.860845	0.241332	0.545202	0.577471	0	0.530559	10.8386	1.71104	0.971759	5.79187	0	2.41593
Pita_unigene54201	13.7117	3.65383	0	1.87943	7.40644	5.27495	70.5806	2.59684	12.6984	5.22002	16.49	11.0593	4.24754	0.798983	4.78334	21.2477	6.15897	32.2332	3.34386	0	4.95657	9.85962	23.1026	9.42749	0	2.90678	13.4386	2.66754	0	0	0	4.55779	8.04622	5.05872	0	0	0	3.76712	6.09809	3.06357	0	0	0	1.76486	14.5144	18.1463	0	0
Pita_unigene5419	16.6102	9.22241	0.710913	0.902861	8.38983	5.11079	0.908308	2.86866	2.91268	1.18983	3.17113	5.11781	0.917627	2.59905	3.2857	3.52125	2.47678	3.84804	2.05835	6.56897	5.55882	11.511	11.0274	9.40681	1.38945	6.79258	13.2135	6.86746	4.04175	1.18019	5.4291	16.4369	17.6283	18.7829	12.1199	2.23348	3.84782	8.30632	12.3454	10.9516	5.63618	2.67772	3.14185	3.77101	13.6707	3.98714	4.533	0.893821
Pita_unigene54173	51.1584	606.826	1154.74	1146.5	568.6	818.889	1238.15	1436.08	1017.52	1483.2	1595.63	806.468	1138.25	1485.68	868.996	1097.61	1514.91	1116.05	1051.72	579.845	376.538	759.17	913.334	671.187	537.394	602.13	265.61	71.3195	333.393	89.1293	1426.58	798.877	803.862	52.9988	309.271	399.237	723.876	850.028	789.862	150.082	44.5107	387.689	2010.96	1435.14	523.588	1983.58	1816.45	367.809
Pita_unigene54115	47.8665	41.637	63.6413	28.3702	52.423	71.677	28.1356	44.2562	41.2643	19.5141	34.4038	25.4705	16.019	51.7805	43.7042	46.8141	39.4993	40.8519	12.838	30.738	29.3186	28.446	48.2594	31.2469	95.0906	54.5247	65.3266	202.862	201.676	69.5477	185.122	71.6558	65.8871	183.64	194.941	215.235	65.0693	51.2084	75.7833	61.9639	61.52	82.1807	43.5804	25.1553	26.9996	29.2402	40.6564	35.1081
Pita_unigene5411	101.079	54.5255	64.4527	76.4285	68.0921	129.024	65.8696	50.0963	54.9377	79.8292	57.0366	81.9381	64.9084	38.837	37.0454	74.5894	112.661	89.3467	64.1585	28.299	28.7983	52.9702	52.5331	56.2097	21.2387	38.5575	54.2858	19.7609	40.4367	35.0028	13.4579	20.1046	32.8667	5.34429	12.9066	16.1499	16.1855	29.1158	40.173	11.5518	11.6196	20.8596	27.3407	44.2685	28.9682	41.6128	24.1413	31.3342
Pita_unigene54060	6.87238	3.04915	12.736	2.36724	13.2959	1.48174	4.28002	1.45882	5.35281	5.09658	19.0491	3.86058	5.00222	5.34952	5.99476	23.0466	1.15451	11.0788	2.10285	3.77923	4.16425	8.94705	2.7179	0.657512	4.14642	2.46532	2.81742	1.49243	1.99408	2.84594	0	0	4.20798	0	2.15263	0.704306	7.33782	3.21175	8.09492	6.41815	5.58166	2.12462	4.33343	5.21134	6.06925	0.634127	8.02498	7.38598
Pita_unigene53986	6.67188	1.89978	0	0	10.9387	23.2405	9.3744	0.465066	13.0755	3.63937	6.49175	8.19098	0.902933	1.25874	34.9517	2.80716	3.34008	15.5614	0.879959	1.42956	39.9636	25.0486	22.8978	34.269	37.2013	6.78486	3.51907	1008.56	44.3513	36.9038	295.867	94.8589	101.835	2840.86	1059.83	901.771	380.574	78.1092	77.8508	1805.82	929.752	292.604	13.6169	7.03773	29.9798	31.8227	136.607	395.977
Pita_unigene53795	7.07469	1.41428	2.63019	0.734809	2.19404	0	1.98156	8.85255	6.84396	0	5.44632	0.717587	1.32962	0	8.66741	3.45877	0.537448	2.43319	1.30281	5.63374	1.93436	1.91853	6.33709	1.22078	6.93894	0	7.84484	0.692311	6.16041	4.63549	12.1064	0.71286	12.482	1.31334	3.9997	1.97097	32.3242	4.50266	20.5664	2.38899	16.2044	6.5885	4.03551	0	3.52682	0.589597	6.12471	0
Pita_unigene5372	1.80688	1.26738	1.09167	0.5762	0.880933	1.28996	1.49903	1.29378	2.23816	1.06728	2.44487	2.3415	1.96491	1.44105	1.76664	2.48657	2.4086	1.49281	1.14165	0.781921	1.40455	1.09378	0.940456	1.52904	0.599069	0.777372	0.574645	0.220661	0.659616	0.29399	0.673715	0.476514	1.35751	0.281706	0.333928	0.259944	0.771972	0.642086	0.963092	0.596266	0.824397	0.548603	1.0934	0.682131	0.853877	1.03677	1.2045	0.786076
Pita_unigene53706	13.7699	4.21839	10.8273	28.1267	1.06099	11.0973	160.676	13.9629	7.32441	67.9561	16.9614	25.6136	56.8685	20.2511	5.51976	9.23179	19.6773	129.825	14.4929	5.15623	6.68541	7.59604	25.5098	1.80996	3.41077	0	7.73798	0	2.76789	6.79212	4.03683	1.04689	10.3916	4.86074	2.98612	6.74196	5.39919	9.71348	10.0039	1.76713	3.85226	8.70202	4.9839	4.06287	3.12511	5.23518	0.992064	7.28287
Pita_unigene5369	0.638346	0.603663	2.22657	0.19866	2.44054	2.29118	0.149196	0.663607	2.34953	0.818364	0.408509	1.37556	0	0.205749	9.29544	1.84333	0.28215	1.42097	0.128149	0.0989022	0.161214	0	0.670258	0.35154	5.1591	0.998059	1.95284	3.52479	11.2531	0.944678	11.3297	2.91491	3.9907	16.8362	8.68491	1.43673	17.8685	1.45608	52.2677	4.01891	4.70905	1.37374	0.398875	0.258298	2.64459	1.56427	2.00546	0.204546
Pita_unigene53662	0.465727	1.27345	1.28591	1.57325	3.15601	2.16612	1.53127	1.72873	1.03244	0.551979	0.562672	0.474433	0.553075	1.01146	3.22827	1.60635	0.575031	1.61292	0.215735	0.689798	0.864144	0.952716	0.995893	0.303737	3.99307	3.85729	1.49591	18.4819	4.36518	1.09541	7.65734	5.40525	4.20553	15.178	9.028	3.99279	3.08854	3.02852	3.28002	3.77197	1.72536	2.33146	0.222787	0.341579	1.03823	0.814956	1.39342	0.215091
Pita_unigene53659	21.7409	9.30849	2.88096	3.20714	4.76924	3.76644	3.62844	20.0179	9.51932	2.96259	8.19586	3.92357	2.90568	15.661	6.09794	4.5394	1.76042	9.25756	7.13132	19.9897	6.35172	8.39731	13.0834	5.35294	16.0286	10.0212	4.29394	17.4554	10.8132	14.4348	26.5707	26.5309	31.7079	37.431	21.1693	22.1776	23.6873	17.9324	14.9732	32.0203	26.26	7.91744	11.0097	14.3691	18.5198	15.4798	6.66971	10.2268
Pita_unigene53657	16.5421	18.9669	21.4389	28.0987	17.6725	11.9738	4.6159	10.985	14.4567	18.1023	4.73607	9.17487	20.021	9.40691	15.1682	8.02613	6.83933	10.4927	15.9385	15.5438	14.2224	9.67053	11.6466	12.7956	60.7555	43.2976	31.9455	47.7627	37.3123	77.9642	38.4991	28.9121	25.4659	35.2016	34.1422	45.6937	25.0963	7.74388	11.884	10.4084	6.02814	14.4997	19.4724	14.403	6.55837	14.397	12.5714	14.5823
Pita_unigene5364	0.741945	1.6795	1.08639	1.15879	1.22813	1.46169	0.270833	0.434176	0.512464	0.0520204	0.198592	0.214121	0.551758	0.289747	0.460728	0.46496	0.74985	0.388433	0.573976	1.70532	1.70381	0.746813	0.547014	0.561204	3.14629	0.97951	1.22605	3.16945	2.51681	1.2319	1.80304	1.96311	1.21495	2.53423	2.36531	1.27375	1.17415	0.350811	0.771492	2.12868	2.63963	0.882987	1.22519	0.475188	0.803844	0.487341	1.48421	0.805132
Pita_unigene53525	13.7322	31.6814	11.5704	39.0315	101.04	16.3759	20.403	9.03959	24.7223	27.3615	23.4829	6.32135	13.4853	4.92433	204.467	53.7165	3.82472	17.2559	6.8936	1.24345	16.5255	3.94068	5.6347	0.539508	32.0967	8.82481	2.88601	4.26847	3.25915	7.62623	1.18648	5.0332	6.20049	3.4784	2.35513	2.91006	4.99032	8.02221	6.08184	1.57856	0.572735	4.65371	7.71676	11.6135	7.46592	1.56829	8.45251	1.10931
Pita_unigene53509	6.84047	6.59789	6.83508	2.23875	11.1878	3.05144	2.01129	7.53562	6.04993	4.82489	10.7944	5.76053	2.78394	4.5989	4.87923	6.5443	2.5282	5.16965	8.31933	10.8693	3.25818	8.32666	4.25358	5.2612	6.04426	11.8159	4.11883	6.12588	5.96051	8.6686	7.49781	18.9472	12.4569	13.2888	12.4971	18.4136	9.56501	18.7127	13.1599	15.3147	14.2934	10.6951	4.67071	12.2963	8.92467	8.08752	4.4566	10.0304
Pita_unigene53398	10.8371	20.137	23.8229	4.73125	14.058	15.358	16.5362	10.7193	11.9156	1.99129	13.8828	17.9531	3.98387	10.9587	12.0105	18.7714	22.4356	17.1114	2.58999	10.9251	6.15471	11.892	7.61566	11.5436	5.9867	10.1634	22.279	1.8863	4.87598	7.74709	2.52004	3.06544	7.48502	2.31555	0.835043	2.28022	11.2073	6.90156	17.9243	5.95774	2.58916	6.11954	23.5659	7.03776	17.5145	13.0053	9.37506	5.29733
Pita_unigene53237	9.25483	4.08173	4.89644	1.92813	4.66923	5.47315	8.53332	5.45647	8.13545	6.21601	9.97273	7.23619	5.29323	4.66446	4.89273	7.13392	1.75781	7.64964	2.78104	5.54439	2.60022	2.73803	7.69774	4.10439	13.3197	7.78402	5.03613	25.3458	15.2374	4.81581	27.9811	31.2603	13.0089	33.7565	24.1568	22.6737	11.7536	4.28415	10.4631	7.20017	5.54812	7.22577	3.95027	8.29873	7.981	7.61036	7.26255	5.79538
Pita_unigene5318	49.3804	15.6643	50.139	27.2463	67.5887	21.411	91.0346	34.1447	37.279	34.8573	56.8136	30.9431	35.2593	58.2358	31.4709	95.0219	51.3619	119.647	13.6779	17.7028	16.2012	33.5409	42.8722	18.2546	29.4847	37.9727	35.1653	3.01279	9.57968	11.8633	23.9438	32.0028	41.4433	2.42481	3.0784	16.5121	16.8585	41.9318	36.6241	6.71312	4.98903	27.2901	49.8963	47.6644	41.5128	16.89	20.5155	39.0621
Pita_unigene5317	8.48855	10.9158	1.73034	1.98978	16.1991	12.8226	4.53207	1.66943	2.8665	1.23676	1.29778	3.34804	2.48271	3.45544	5.5416	5.19446	3.93316	8.122	1.68197	4.00439	5.09823	6.41333	4.81838	3.52373	2.53572	9.83084	12.5742	9.23271	4.02436	2.68258	2.28593	18.6101	5.43439	7.54403	8.79733	4.44693	0.464872	4.22787	1.18493	1.17595	0.752006	1.95429	1.17115	7.28006	6.9396	0.847197	0.997922	2.94976
Pita_unigene53099	6.33705	7.75341	5.46768	1.66695	7.30763	2.68329	3.62142	4.33207	5.29124	3.05001	7.88886	2.18245	3.68142	3.78138	8.36297	8.38978	1.20862	5.86532	1.71376	2.65202	2.33416	4.00816	2.60084	0.403007	60.6075	31.3812	11.2253	14.556	29.2254	16.774	52.6688	77.4846	36.6502	16.1088	53.796	23.7713	8.07922	12.0403	3.89251	3.10182	5.04111	2.81293	4.36686	3.19267	0.986575	1.78444	1.61558	3.54513
Pita_unigene53075	91.6302	79.1762	59.5846	82.5234	80.843	51.6413	111.341	92.5292	99.6722	95.628	67.3651	98.869	121.039	67.4692	127.166	110.314	86.5591	128.873	98.4658	59.7025	140.145	85.6167	74.9117	82.2892	38.5559	38.4716	60.6856	7.62368	26.7638	44.7312	16.6316	30.3576	44.8384	2.85535	13.3674	17.6459	46.5802	39.8067	64.9039	7.28065	23.1933	34.6665	79.9335	68.3827	63.9147	79.3779	32.112	66.5202
Pita_unigene53022	0.237107	1.06082	0.65465	0.492926	0.476354	0.464276	7.12659	0.586702	2.41769	0.562064	1.26054	1.44918	0.675777	0.411986	0.848197	0.233663	0.877755	1.64174	0.219657	0.117079	0.219961	0.215556	1.12656	0.103085	0.262292	0.506932	0	0	0.20673	0	0	0	0	0	0	0.109903	0.112299	0.26812	0.11927	0.101067	0.219593	0.452049	1.02076	0.115952	0.117467	0.311035	0.118217	0.547395
Pita_unigene52932	0.228148	1.06056	0.524587	0.315506	0.485826	0.186988	0.0718303	0.188514	0.236519	0.0720248	0.0733268	0	0.0361633	0.0658915	0.683174	0.149917	0.223647	0.071197	0	0	0.106127	0	0.181693	0	0.126439	0.0804014	0	0.0377648	0	0.14259	0	0	0	0	0	0	0.0362171	0.0862621	0.153372	0	0.0705073	0.110015	0.0728131	0.110749	0.262829	0	0.381511	0
Pita_unigene52844	0	24.4448	46.452	7.45667	10.8871	25.4929	6.73709	6.88721	30.4819	8.02342	7.992	11.101	7.86468	24.2677	13.8394	11.7889	61.8509	27.4933	2.22869	3.53485	9.98077	2.18255	8.3522	7.32688	15.6711	16.4521	11.1151	0	0	1.11067	3.50153	10.8973	9.26657	0	0	0	4.12913	9.95022	4.57663	0	0	3.34759	20.6887	18.7057	17.9122	14.1545	2.2703	1.05169
Pita_unigene52794	39.9005	272.105	4.5262	82.6902	88.443	148.197	22.5763	0.37092	55.8199	56.3603	16.1501	52.1067	67.1792	1.31989	53.1895	31.6719	30.714	19.5725	56.9551	0	67.2534	29.9617	7.11321	14.962	23.2932	177.613	151.979	1.09406	17.6078	36.7506	6.80451	19.6242	10.7565	0	3.57217	6.69262	2.07709	4.99044	5.99959	0	1.04243	2.11023	28.6829	57.407	26.1533	1.27408	8.21682	27.6392
Pita_unigene5265	14.9154	61.8251	109.657	70.5395	111.416	50.1588	10.795	103.696	61.7173	59.838	92.7271	40.101	56.7054	88.3529	33.8149	88.1587	30.8643	14.7408	63.7215	96.352	41.3776	82.0734	12.6973	36.0882	60.5432	0	0.0668249	14.232	0	99.4986	38.7582	0.0719717	0.151505	5.52849	0.197086	75.6006	39.3615	0.155917	0	5.99887	0	64.2694	42.181	0	0	8.99839	0.295343	81.3965
Pita_unigene52500	8.68348	4.71508	6.20696	3.30897	2.46943	5.02171	13.703	7.36571	9.45176	4.90591	6.53652	10.0165	3.38042	11.1048	3.50197	3.10393	3.41722	13.0012	3.65583	5.54032	5.47643	3.58528	8.84403	8.90823	3.4814	5.2016	1.45499	0.384348	2.06222	3.74948	2.63917	3.24184	3.92123	3.70092	1.88195	0.74243	3.63536	5.68137	6.70376	4.35655	4.02299	5.18039	4.90029	4.29136	3.54473	2.68123	1.94174	2.14524
Pita_unigene52499	0.328875	1.79655	1.21099	1.02679	0.334011	1.12415	0.924524	0.650537	1.16497	1.24817	0.795972	1.673	0.936853	0.715612	1.76138	0.486112	0.669267	2.10943	0.913859	0.326001	0.761933	0	1.09073	0.428787	0.54511	1.4147	0.15077	0	0.286685	0.310041	0.791088	0.678607	0	0	0.314331	0	0.930993	2.41296	0.165342	0.700597	0.609095	0.155772	0.943396	0.484025	0.163079	0.570081	0	0.453347
Pita_unigene52314	12.1046	3.72676	13.8354	4.77858	3.77038	6.26747	3.45973	0.88209	4.0442	2.66223	9.70268	4.69823	1.72954	0	3.25293	8.11084	0	7.03455	1.7041	2.74478	0.840825	0	0	0	8.03082	16.7945	11.1215	3.62577	4.85513	45.5619	5.31525	10.2091	9.22212	6.01456	3.50562	8.54074	26.3788	16.2808	25.7308	53.1029	12.7039	35.0836	1.75059	4.48723	1.84919	3.84968	6.15698	2.42594
Pita_unigene5227	2.87583	2.8608	1.49954	2.58904	2.00985	2.16086	3.15579	1.51869	2.97636	3.54314	2.96252	2.83324	2.27717	1.74762	2.98886	2.52335	1.26915	2.30985	4.97474	2.74035	2.84798	3.838	2.91917	2.50112	1.69751	1.5087	2.46482	0.85216	1.003	0.540666	1.30095	0.791059	1.57162	0.639821	0.826547	0.354699	2.0917	1.1934	2.8948	1.63481	1.59848	1.19163	4.40287	2.71363	3.32127	2.69504	1.72334	0.976031
Pita_unigene52259	50.3085	87.7769	38.9396	63.2111	52.5575	80.9466	13.5738	17.7821	26.2973	18.829	3.95228	28.5205	33.048	10.9337	31.9025	17.2662	35.0691	20.1261	43.0611	47.0078	71.9742	37.6258	19.8676	25.0779	11.2721	6.59467	18.2099	2.04416	1.82597	12.5	1.9977	4.1528	6.86599	0	1.9738	1.90659	13.3741	10.7	23.7832	14.8783	3.81189	20.1058	39.4718	30.1671	40.277	25.9122	33.3912	59.5629
Pita_unigene51894	52.7462	9.20626	48.3284	20.699	1.65633	21.4707	75.2994	12.997	26.2185	11.9011	11.9692	36.4319	24.9973	17.8492	16.382	6.82446	49.0996	70.2873	15.2428	15.224	13.4044	12.2417	86.9584	45.0226	20.9307	8.75615	20.3335	2.19084	9.74189	43.4625	12.841	2.42281	5.52121	0	1.2727	3.75793	14.1474	0.919292	16.7185	5.12702	6.03788	7.47326	40.317	14.1349	28.6808	30.4552	15.6131	12.3362
Pita_unigene51689	8.83772	31.1328	13.4417	2.90808	5.37187	11.7673	33.1393	1.24305	34.1451	1.39062	0.51309	7.17139	1.50575	4.62059	30.8749	9.03905	39.8173	62.4813	0	0.913572	15.3761	0	25.5694	6.3621	3.45668	3.1588	3.8443	0	1.7022	0	0.504837	1.71117	10.901	0	0	0	0	1.22301	9.32785	0	0	0.228225	12.9591	8.68276	14.1153	12.0309	22.3446	4.20168
Pita_unigene5167	0.462903	1.22334	23.8073	2.41269	10.6525	11.2817	2.16183	5.61978	1.24848	3.81292	12.5025	7.28466	4.72879	5.05144	0.893879	6.41593	9.85049	5.0355	1.28464	6.05254	1.07094	6.49747	2.64595	1.20482	0.140152	0.250791	2.32758	0	0.201736	0.218685	1.25254	0.477228	0	0	0	1.08133	0.914074	0.26011	2.93412	0	0.428356	0.435179	1.76862	0.684065	1.49026	1.90613	3.56099	0.211497
Pita_unigene5156	0.249176	15.9175	0	0.258063	5.55278	1.22676	0.156833	0	10.3344	0.0791916	5.80205	2.27944	0.158416	0	7.84038	2.3169	2.00057	0	0.0769204	0	11.9772	7.73352	0.158808	1.14997	14.0332	15.6358	1.5201	16.9479	19.4993	7.16847	16.006	10.6593	0.99124	15.6284	10.7637	10.4402	14.7574	13.5028	2.41087	24.2186	16.5476	9.91865	11.1191	12.409	1.87553	9.79481	13.9295	6.76122
Pita_unigene51513	10.558	8.18018	23.8777	9.55037	62.8046	7.78333	26.8959	47.3546	26.2476	24.211	68.1902	44.8808	25.9385	73.1416	48.8895	127.72	35.7523	22.437	56.5982	128.202	41.3646	93.3123	32.0557	56.0386	41.3795	14.5924	14.9928	39.97	9.18087	13.8936	148.54	59.019	73.895	316.012	121.336	114.601	72.3632	101.437	63.8487	162.035	67.8946	47.2218	102.695	76.1494	56.2028	43.5891	41.5473	65.4777
Pita_unigene51475	0	35.1723	4.96646	10.9351	2.14019	9.1788	11.8641	11.0806	53.6364	26.2133	25.193	22.6354	14.8498	10.2236	4.64628	10.3546	10.3342	12.4899	19.5005	26.0196	10.6093	12.4579	14.7119	28.3394	8.03612	23.5324	23.4189	3.12612	0	11.7387	4.076	11.6345	9.33632	3.9245	5.02391	11.6803	6.3591	26.1336	36.4076	3.56836	2.92002	3.90314	17.1257	34.8598	15.7595	22.9193	5.00916	14.7149
Pita_unigene51458	0	0.597745	7.10454	1.57385	0.934306	0.587657	0	5.48702	0.266476	4.29947	4.97319	3.97222	2.28997	4.21573	0.535362	2.66562	1.674	0	3.62374	3.60741	2.50666	0.818162	0	2.08849	4.88624	3.93941	1.93326	5.66615	4.19475	6.53944	2.29996	1.85906	1.98902	8.67539	5.16263	8.05785	5.89244	2.35635	3.01868	5.08667	6.69265	7.91821	4.60185	3.56951	1.49862	5.78123	3.56246	5.25546
Pita_unigene51391	91.5787	79.3481	133.557	65.8084	68.7045	162.076	58.409	67.8545	84.8286	67.8819	123.561	168.428	38.2974	49.2048	67.3893	91.6944	196.346	37.3036	28.8585	23.3739	41.3349	71.2608	54.3265	139.909	66.5857	80.978	135.575	59.5657	79.8335	50.8547	38.5037	32.3293	33.2423	35.0371	33.8266	49.5473	232.778	269.74	221.493	283.365	231.207	333.125	157.105	102.529	87.8062	144.907	128.595	70.3966
Pita_unigene51366	60.4696	115.123	275.867	54.7564	31.0622	360.295	279.652	14.3874	162.3	71.3797	33.9644	202.124	37.4338	23.9879	124.62	43.9986	406.136	260.417	42.4597	35.9059	111.406	5.79681	144.892	174.846	186.53	62.6136	269.367	22.4989	76.2522	9.97289	93.1888	24.5404	566.465	29.5351	60.6609	9.16787	134.994	48.5891	357.069	169.979	41.4913	27.5898	556.497	326.987	471.415	419.935	216.947	99.2568
Pita_unigene51351	1.21855	7.33344	6.79785	3.72834	13.3065	8.11138	3.36854	3.44361	2.1022	3.43861	3.42514	0	4.4941	1.05512	7.45198	5.89446	1.81915	2.03654	0	7.0697	3.32692	6.54765	0	2.09339	18.2829	20.2487	4.44603	63.0566	15.9556	5.55336	31.5137	18.1622	19.8569	54.8996	31.0135	10.974	9.29054	8.70644	6.86495	9.15656	12.2028	5.57932	5.74685	0	3.58244	3.03311	4.54059	2.10339
Pita_unigene51345	87.1341	78.0895	131.114	63.1921	38.9702	48.4538	89.6761	116.73	143.794	88.6987	49.339	45.274	62.7199	127.08	61.5937	82.0142	34.3809	61.1986	47.2178	54.5897	28.4163	32.8529	49.1428	21.1478	27.5262	81.7376	83.1503	29.8185	79.0286	74.2822	38.1795	32.9554	44.2944	14.479	18.1886	34.3558	54.698	84.0133	101.971	23.7993	20.3955	40.7753	28.9281	66.1039	43.7137	41.4767	27.7754	21.6473
Pita_unigene5131	0.651181	0.915746	0.457993	0.635666	0.263546	1.36457	0.425984	0.189902	1.14202	0.706074	0.517074	1.57913	1.12932	0.0995665	1.0667	0.453065	1.04409	0.537885	0.959538	0.187923	0.819627	0.139793	0.658901	0.743177	1.85624	1.36316	5.62715	0.648604	0.802312	2.15464	2.43033	2.33304	6.86906	0.293947	1.56525	1.62159	2.56034	2.59177	9.25289	0.392357	1.20745	1.40373	1.24694	1.882	6.40714	0.749758	1.11451	1.66403
Pita_unigene5124	0	2.58672	0.6842	0.772899	5.48366	0.121282	0.232682	2.08453	10.3263	5.28755	55.5878	0.378594	8.12247	4.41471	2.21575	27.8409	0.610818	1.82845	2.29567	0	2.18376	14.1886	0.235404	0	0.822342	2.2534	0.454767	0	0	0	0.478918	1.15042	0.949776	0	0	0.114912	0.234651	4.48237	1.8697	0	0.11475	0.472075	1.65944	3.27354	2.82403	0.974243	0.74103	0
Pita_unigene5111	0.244199	0.573791	0.223351	0.405026	0.98557	0.121475	0.266877	0.442533	0.310773	0.311548	0.317072	0.189041	0.219167	0.249286	0.704776	0.243842	0.0694355	0.328287	0.0954216	0.08059	0.325416	0.0938844	0.220506	0.020182	0.214047	0.534015	0.18937	0.0613724	0.233366	0.250395	0.0603456	0.0976665	0.0934099	0.0395232	0.185873	0.245626	0.117651	0.14004	0.173641	0	0.0190694	0.0526372	0.157532	0.288738	0.1826	0.0551021	0.123966	0.153582
Pita_unigene51089	43.9162	1.43845	18.6916	0	4.10427	2.0988	4.70279	2.07075	6.3295	0	1.51244	0	0.675302	1.56497	3.12095	13.8488	5.4612	0.617257	0	0	1.31249	0	24.936	0	7.83432	1.55326	5.31671	20.1678	6.88771	12.1111	8.89854	7.64135	22.0309	4.18602	21.9087	17.4388	11.3626	11.4113	4.56085	2.21808	3.29323	6.70661	0	0	0.0258512	0	2.07232	13.3622
Pita_unigene51021	6.75609	4.83173	4.25967	5.64632	2.23225	4.48458	7.83839	8.00234	5.50347	6.17866	7.38471	8.23239	5.39412	4.96484	3.12883	4.26003	3.23718	5.12197	7.50497	2.45473	3.2549	2.69452	5.3447	7.5428	3.28019	12.9396	2.75711	1.31844	1.64928	5.11568	1.80822	10.0336	0.297867	2.79527	1.03062	3.03564	4.54949	11.5195	4.07478	1.37895	1.75386	3.81237	3.61701	10.9345	2.42184	7.6624	1.86871	3.20626
Pita_unigene50860	33.4632	62.9989	14.4633	22.6519	18.8349	15.329	17.3048	17.811	67.9703	19.9501	28.1533	18.7401	21.5391	15.5927	67.4603	24.3316	11.2943	22.7612	10.9603	15.356	69.9784	15.8042	18.9118	12.4012	2.6895	0.763682	12.5128	12.2154	1.21417	20.1724	0	2.14847	21.5288	12.0867	0	19.676	0	0.387744	26.5353	11.2394	0.323244	22.8858	0	2.75735	12.5096	7.41243	0	16.1478
Pita_unigene50807	4.49576	1.49059	5.55804	5.73777	4.16485	6.81623	11.2184	2.4326	1.326	4.76988	5.3436	7.07215	4.72282	3.07736	2.20423	7.33933	11.643	6.14724	6.91081	2.99219	1.83976	3.61293	4.13905	7.34513	2.74297	2.7332	3.68808	2.43738	1.73875	5.19146	0	2.54281	0	1.39619	0.473071	0.935818	0	2.17599	0	2.53326	0.921334	2.80266	1.90042	2.45382	2.49015	2.95181	3.41323	3.58382
Pita_unigene50803	98.2505	138.396	162.994	218.948	403.738	248.125	108.709	109.055	74.3913	104.274	79.3925	160.133	157.752	120.813	228.916	171.581	129.785	198.506	151.047	173.752	243.916	326.292	109.308	219.516	157.664	540.591	753.878	3327.81	1556.78	1119.77	129.339	637.44	620.285	3822.3	1315.95	843.636	372.478	548.963	598.088	2846.61	2065.29	1100.78	16.767	132.549	430.026	316.198	396.9	561.065
Pita_unigene50691	0.817155	2.57195	0.2507	2.12469	0.549706	0.266474	0.76675	1.6172	0.724319	1.42108	0.922187	0.832071	1.8113	1.18424	1.58227	0.134209	0.111571	0.877564	0.757012	1.3471	2.65242	0	0.775727	0	0.301213	0.437748	1.74927	0	0.474989	0.128252	0	0	0	0	0.260545	0	0.128868	0.153899	0.821888	0.348234	0	0	0.651367	0.133377	0.809996	0.593416	0	0
Pita_unigene50524	3.4179	3.69391	4.3713	4.23324	3.9823	13.4263	4.84707	8.64991	5.10723	1.20055	6.11818	9.29093	2.94446	6.88005	4.6591	3.48389	17.2111	0.940286	3.08781	5.63175	1.99977	4.63304	1.94862	10.6695	0.376999	0	0	1.03977e-06	0	0	0	0	0	0	0	0	0	0	0	0	0	0	0	0	0	0	0	0
Pita_unigene50504	6.39047	4.45255	8.29098	6.64566	5.9636	1.86295	2.38475	4.31579	6.74551	7.91503	11.6969	4.53044	3.59921	6.72199	2.80289	4.37421	10.7415	2.20537	0.587963	0.636149	2.33046	2.88161	3.45253	2.20666	5.57858	13.1804	3.54271	1.87435	2.77882	20.9855	4.84932	19.946	7.04928	2.37364	3.01101	4.76381	13.5851	20.4947	18.678	10.7737	7.02966	43.4617	4.85958	5.00684	3.18167	6.41544	3.08714	2.26657
Pita_unigene50373	43.6429	58.8159	51.0853	23.2656	52.3535	21.6111	40.162	45.744	48.0081	23.0625	52.1664	27.0206	24.5326	44.4943	51.053	55.0971	18.2424	47.3155	23.5835	27.1742	63.5631	43.9979	32.5736	16.5665	31.4278	18.9632	28.3222	11.5851	17.0249	11.2285	12.4399	13.4529	24.3892	5.26873	11.2329	7.72456	17.6555	13.4995	18.4977	7.09652	9.934	7.17655	29.9811	17.6337	22.1727	15.0205	12.1311	14.7736
Pita_unigene5029	7.07749	28.0733	12.299	15.7459	22.1482	7.49023	2.45666	2.3568	2.34727	1.66257	1.40666	1.75391	3.39138	4.02508	8.4338	5.85907	2.38811	2.24061	0.472603	0.72327	2.26353	0.722571	1.2968	1.42875	11.9017	3.66056	5.88428	5.94972	6.86624	9.61602	1.25445	3.56123	3.76485	0.654113	1.24972	1.35697	3.71634	3.19596	3.36647	0.270338	1.72388	4.41058	4.55272	2.25766	5.48349	1.55329	6.51248	2.36878
Pita_unigene50202	96.2813	13.9627	11.5239	13.6304	25.4359	64.0295	23.222	7.41404	3.39976	3.70324	9.68601	3.13886	7.99062	8.17094	7.45303	4.5394	5.86805	23.1439	2.85253	65.3511	1.41149	20.9933	24.101	5.35294	89.4228	28.3933	45.0863	1567.19	150.034	239.618	107.759	92.8582	42.8485	1425.26	169.355	219.63	279.511	37.4951	41.1764	175.131	226.404	253.358	10.2757	6.05014	30.0947	12.8998	22.2324	25.9079
Pita_unigene50190	21.7132	1.27688	1.18199	0	10.1208	0	1.17321	2.38996	2.19502	0	3.57267	6.4297	2.34673	2.19961	17.8364	13.5363	1.89489	1.0632	0	0	0	1.13468	4.3617	0	1.36363	2.63598	3.48238	1.24239	1.1134	16.1625	3.65957	6.3381	0	39.6313	4.78671	2.28796	81.9183	6.49007	94.2723	126.593	13.8977	42.9318	3.60382	0	3.75144	2.11021	10.6778	0
Pita_unigene50142	3.7953	0.645057	2.28966	2.60287	2.48074	1.66073	1.28758	1.77677	1.58587	2.58621	0.963951	1.93231	5.53603	4.25535	3.27947	3.13792	6.5611	1.2637	1.27588	4.89007	2.23289	1.56313	2.2311	1.76517	3.77021	0.707389	2.39901	18.7457	9.0283	4.57031	8.78747	2.91654	4.30427	23.4904	9.37144	8.80227	10.4803	2.89412	15.6424	11.8938	10.2569	5.37276	1.69578	0.677732	3.27887	3.07415	3.79495	0.953962
Pita_unigene50073	4.08458	13.3381	136.598	31.678	39.3486	66.9803	2.72283	98.1863	56.1249	139.046	200.476	219.955	238.749	30.6954	10.7792	111.126	202.386	0	54.8807	135.033	19.7944	383.215	197.489	545.805	126.119	995.034	239.448	466.636	91.9473	680.956	419.062	1190.33	210.309	227.898	57.854	580.444	253.364	960.487	720.35	163.504	102.987	401.022	83.3053	746.986	437.706	241.421	273.077	146.532
Pita_unigene50025	37.5429	47.3251	21.0672	14.6524	8.74974	35.9759	13.4949	63.55	19.4834	21.3895	21.794	43.3779	16.3454	40.7394	17.3636	21.5948	21.6833	8.52971	24.7885	30.4265	15.5145	23.2288	13.8035	23.5725	3.96361	25.4374	14.7314	5.05714	2.0871	31.5019	1.90766	20.0736	8.37897	1.87191	0.761442	7.13295	1.10309	18.564	15.1516	3.392	4.07057	18.7271	22.8641	24.8529	11.9508	29.4933	5.50159	14.8372
Pita_unigene50024	3.01727	3.42679	1.85156	20.924	14.0883	16.8597	1.48249	2.41634	1.9101	8.58677	4.72627	9.06878	15.0153	1.87457	2.05395	6.23004	11.8673	1.98167	9.98233	3.55501	2.9313	7.6986	2.59062	12.4903	14.4556	13.5621	11.4663	40.6906	14.7806	18.137	12.745	8.89475	8.66329	18.9511	8.65699	14.6834	9.78402	5.68107	6.50254	17.3898	6.78722	9.55542	8.38309	3.37911	8.40422	11.2531	6.15017	10.3223
Pita_unigene49943	22.4578	26.1556	16.3606	9.93125	7.73079	6.74735	17.5996	10.471	15.0929	7.3239	8.47077	12.2862	14.4219	12.9623	20.888	15.9682	13.6536	27.0647	8.94998	6.78769	11.8577	9.77321	11.9442	6.88053	9.24616	11.9102	9.19893	4.56974	11.9223	5.42876	3.34435	7.77967	4.42881	4.04019	11.0644	6.32254	6.19969	5.2664	5.17506	5.82583	7.38044	7.96764	11.4779	12.6927	6.62626	6.0363	14.8568	6.44977
Pita_unigene49903	11.4952	7.66129	13.0019	2.59879	7.59062	16.9081	4.69285	29.8746	10.9751	15.5354	15.4816	18.0032	25.814	26.3953	12.2625	31.995	44.53	14.8848	20.982	35.564	18.4527	51.0605	18.5372	38.2765	21.8181	26.3598	33.663	85.7247	20.0412	25.3982	63.4326	24.0848	33.1647	134.047	82.5708	73.2147	54.9715	32.4504	40.5729	95.7427	93.8095	60.3365	27.6293	13.4248	36.2639	48.5348	34.4062	27.3943
Pita_unigene49783	8.84439	9.64648	4.46897	4.97488	0	2.33426	12.7474	10.7253	9.15112	9.97016	0.7698	7.30583	6.76561	14.8072	14.7575	0	24.2452	16.3876	2.21755	8.75515	12.3961	0	17.7634	3.45748	0	0.862945	0	2.3547	0	26.0826	1.53063	0.806204	0	0	0	9.63511	0.69875	6.7249	0	2.70113	2.93911	19.3357	0	1.5624	0	6.67541	1.53071	15.4927
Pita_unigene49766	74.0805	10.2151	5.90995	7.79638	34.1578	18.1158	11.7321	3.58495	25.2427	15.5354	14.2907	12.8594	11.7336	5.49901	27.8693	19.6892	19.8964	29.7697	8.15966	3.67904	11.5329	18.1549	27.2607	7.6553	50.4543	39.5397	26.6982	60.877	13.3608	69.2679	51.234	24.0848	42.8377	108.403	26.3269	46.9032	47.4264	24.6623	46.5395	41.4885	18.5303	9.28254	6.00637	15.8657	36.2639	13.7164	7.11852	6.57464
Pita_unigene49695	756.727	672.887	867.353	601.599	425.873	523.613	1267.67	955.255	1224.92	1146.65	1241.01	1138.66	426.167	662.46	644.269	666.351	467.521	753.844	806.427	409.738	992.988	814.109	1010.12	1033.6	288.062	1073.55	902.316	29.7201	232.729	542.742	114.559	600.766	589.3	11.294	163.146	334.761	151.087	786.588	657.574	282.674	279.036	344.295	735.123	1519.12	1177.42	1280.31	852.676	723.888
Pita_unigene4968	0.0909737	0.145072	0.970464	0.28292	1.81419	0.232924	0.0516315	0.108299	0.0323536	0.103376	0.122738	0	0.0102678	0.00907869	0.662848	0.251108	0	0.341892	0.0300389	0.0105787	0.0846967	0.0098319	0.0308559	0	0.363224	0	0	0	0	0	0.106825	0	0	0	0	0	0.0102877	0.012223	0.0917963	0	0	0.0208485	0.0206543	0.0176318	0.0718032	0	0.0848599	0.0339837
Pita_unigene4963	1.1162	0.508834	0.137138	0.325564	0	0.466605	1.47792	0.15759	0.416412	0.425497	0	0.304542	0.304691	0.268708	0.536539	0.429	0.677885	0.278242	0.275026	0.433486	0.427874	0	0.866514	0.640324	67.488	0.797623	42.0122	0.503209	0.520964	50.534	71.2993	0.620765	48.5722	0.14861	0	43.4044	81.9564	1.10579	48.657	0.423677	0.279557	61.6268	68.3348	0.281674	42.6431	0.139748	1.14942	37.2573
Pita_unigene49600	26.1461	49.294	134.657	26.553	8.3914	111.35	145.098	5.92604	60.694	28.8947	11.4442	68.2375	18.3328	8.70444	37.0917	18.5733	169.894	127.602	21.3243	13.4615	32.3781	4.8111	75.7418	50.0122	68.1098	19.3436	99.7995	9.06915	19.9217	6.91768	38.0409	14.8312	162.206	8.02099	14.7861	2.83995	54.341	28.0614	139.399	44.1285	11.7343	13.2317	215.133	117.637	172.337	134.007	68.2927	31.2904
Pita_unigene49549	12.8573	18.5385	24.783	12.3979	18.2208	11.1184	78.8853	45.2554	43.3417	31.1446	87.8099	24.8657	30.4153	97.7176	50.7359	82.886	44.1176	73.587	21.094	30.0003	19.764	36.4738	84.1757	43.5797	59.6827	48.9358	12.4456	30.3196	186.468	157.241	88.6409	64.5232	30.1853	66.9233	147.33	141.686	125.443	109.843	78.0043	94.5184	243.701	144.104	61.4192	31.0802	34.9854	37.2112	87.8125	50.0651
Pita_unigene49539	16.2599	12.4924	18.0798	13.5947	15.5113	7.24892	38.2818	22.6719	59.1645	27.9365	74.1296	22.0552	24.188	16.75	18.0568	35.0892	24.5992	35.2695	34.2779	35.2959	21.8222	40.3927	41.2401	39.8229	18.8891	43.7717	59.5371	82.3144	27.0471	23.2317	43.3654	69.2221	116.68	80.7069	28.6711	44.0321	35.0602	54.9495	99.8865	70.3364	34.7675	13.0785	26.0891	63.1432	129.785	126.432	24.5584	17.9801
Pita_unigene49462	1.79633	0.895881	0.832299	0.922977	1.81831	0	0	0.850083	0.779781	4.26738	0.853219	0	4.17493	1.56987	0	1.73735	0.671536	0	2.46136	0	0.810594	2.41925	3.13552	0	9.68978	1.90448	1.64861	6.11264	3.11487	2.48649	12.8101	6.26882	2.95813	9.10335	6.74293	4.94234	6.9468	3.69947	0.856668	3.76083	6.52467	0	4.21541	0.867048	0.891312	2.9683	0	2.34002
Pita_unigene49439	2.32139	0	4.29748	3.54575	4.60236	11.0101	3.2012	4.36074	0	0	4.3571	5.84631	3.20786	3.0199	2.01652	7.83748	7.76496	2.89767	3.17084	6.73029	0	1.03677	0	3.96239	38.4438	9.64752	19.0581	140.121	43.3661	7.41102	76.3606	42.3898	22.6724	134.648	52.349	13.6736	33.391	10.6231	10.91	29.9878	16.7943	1.06149	1.09131	1.10813	5.67226	2.87342	6.49804	1.99489
Pita_unigene49420	195.538	21.8402	60.486	34.6821	28.9395	59.9279	183.239	83.7754	178.505	85.9079	95.691	355.555	63.6909	145.371	162.078	216.609	310.921	379.965	26.6935	53.9718	15.7394	53.6762	50.9709	96.0887	117.511	332.968	61.215	210.271	243.399	468.982	292.982	460.032	132.206	571.823	177.743	263.067	415.541	482.104	484.913	619.551	578.49	847.402	70.8277	44.1512	27.7668	168.405	49.449	20.1014
Pita_unigene4940	12.1445	12.4739	10.2915	6.6035	13.227	9.43426	11.1277	9.04541	9.11937	6.95929	8.54371	10.2785	5.64039	4.3215	7.65698	8.66889	7.11377	7.60697	4.9931	2.05794	8.05975	5.07886	5.37003	4.12449	2.624	3.75244	2.56812	0.55285	0.864088	0.984818	0.363984	0.802239	0.835845	0.0636388	0.241914	0.231915	0.59284	0.467508	2.19621	0.169318	0.0929905	1.06577	4.78858	4.99758	4.55175	3.11894	4.64956	3.60968
Pita_unigene49295	12.2921	11.1882	8.95525	5.07168	11.0709	11.2163	8.7969	7.37484	8.01981	6.11279	10.0133	6.00268	3.90947	4.42353	9.26342	8.68317	5.51219	6.41773	3.07347	3.64471	7.22523	3.28663	3.73477	4.61919	3.13483	4.61478	2.59225	0.424266	0.644238	0.648342	0.458285	0.768271	1.72887	0.0459447	0.220462	0.106706	0.455118	1.84686	1.40415	0.0270216	0.385094	0.731781	4.39276	5.56678	4.70361	4.37727	5.00617	2.8384
Pita_unigene4929	0.0346544	0.114031	0.410268	0.215572	0.106866	0.221509	0.0581428	0.222898	0.280357	0.303987	0.34117	0.184331	0.642152	0.429211	0.266838	0.221721	0.27732	0.380156	0.225131	0.131121	0.174777	0.307655	0.152446	0.130737	0.169613	0.304707	0.127647	0	0.0819541	0.0324651	0.20334	0.106246	0.150753	0.0221971	0.0999195	0.0637001	0.117254	0.253014	0.209773	0.167672	0.107123	0.133988	0.066371	0.0809963	0	0	0.0232087	0.0270958
Pita_unigene49112	0	0.842111	1.6905	2.21241	0.524886	1.71012	0.510747	0	1.91513	1.59445	0.827235	0.609447	0	0.842232	0.383669	0.614221	0.141337	0.214273	2.05032	0.0318625	0.175121	0.989249	0	0.0681089	3.40054	0.180372	0.299745	4.58935	3.15402	4.13876	7.01538	4.4161	2.32973	3.51115	7.05285	2.25322	3.71873	1.82758	1.86976	2.51114	5.31668	0	4.14895	0.0302493	1.17559	0	3.07994	0.880285
Pita_unigene49084	19.278	57.4316	22.6318	11.3869	22.2301	24.3273	14.7779	15.4972	17.3958	8.69523	45.0308	15.9964	10.6596	9.22552	15.8674	19.6423	32.6693	13.1648	3.88997	5.61417	17.1838	14.6168	8.85171	12.4714	7.33973	12.672	6.12849	2.38758	6.41034	1.33035	2.67848	5.76227	6.18411	0.985597	4.34352	0.659328	6.82116	17.5351	10.1791	9.81437	4.55058	10.1919	30.8178	19.4031	12.2263	17.2905	52.7732	6.36795
Pita_unigene49059	11.0791	10.3785	3.21334	14.9202	4.92203	6.49657	6.82035	1.87358	10.9456	10.2635	12.9415	5.46621	12.9484	0.832381	12.1037	5.30194	17.8386	6.54179	5.27303	0.316923	6.73365	5.45753	7.12561	5.7699	1.04824	4.84169	13.1014	0.924465	5.24083	9.90575	2.72127	0.977391	4.88409	0.594315	0.905103	2.67625	4.42326	4.24387	8.896	2.15115	1.76123	6.84495	3.93533	1.87893	6.94562	6.74694	4.05556	2.59222
Pita_unigene490	0.277755	0.261695	0.139743	0.0571916	0.225849	0.0806027	0.0976017	0	0.160903	0	0.0738898	0.101609	0.243069	0.131581	0.114508	0.09364	0.0357681	0.255097	0.170563	0	0.116888	0.189504	0.170408	0.0588352	0.441505	0.307751	0	0.173827	0.0775221	0.208321	0.65735	0.244393	0.208844	0.292569	0.217628	0.165163	0.706228	0.13852	0.19914	0.0833046	0.287777	0.101568	0.40017	0.469162	0.249292	0.317666	0.180717	0.277078
Pita_unigene4894	3.51977	3.35895	8.43899	1.73161	2.50641	1.52766	1.38699	11.2915	0.603055	1.12254	1.99485	1.16985	1.23766	2.66108	3.39502	4.50578	0.713728	3.59592	0.438607	3.72196	0.819554	1.41864	0.775707	0.574253	1.45217	1.17055	0.777665	1.32312	1.05702	0.823257	1.37686	0.367909	1.12023	0.850394	1.56949	0.517366	3.29666	1.73529	3.42602	1.89359	1.19688	2.78379	0.334901	0.836142	0.779585	0.979341	0.852535	0.800264
Pita_unigene48921	137.238	162.049	132.647	35.2793	89.0759	57.6519	183.462	100.444	214.896	75.2586	94.5817	107.248	128.042	81.2694	213.746	193.368	135.261	147.666	58.6568	37.5572	172.536	83.8922	125.809	77.0148	42.7676	30.6003	58.2185	13.6623	71.6583	29.9961	21.8584	18.1488	47.5504	12.1213	50.2897	20.989	32.4655	21.6656	46.1521	20.7143	26.6604	39.8746	80.894	54.5903	81.0441	69.0931	34.1816	100.733
Pita_unigene48864	25.1404	34.4725	74.3653	11.4686	32.9908	44.7676	7.78439	44.9866	22.6475	9.76152	5.29237	36.6462	20.7545	42.3947	26.0234	8.11084	29.9867	3.90808	15.3369	67.7045	28.588	2.51043	7.30151	32.011	8.03082	6.91539	23.0984	13.5966	12.947	0.859658	2.65762	10.2091	15.3702	6.01456	8.76405	0.854074	10.3916	6.70386	12.4217	1.56185	1.69385	0.855697	6.12708	11.6668	17.5673	6.15948	9.67525	2.42594
Pita_unigene48816	5.42973	10.2713	12.8282	22.436	8.19307	10.3493	8.972	6.11752	4.81428	12.9877	6.25814	7.69441	14.2088	4.41424	4.52472	9.12822	5.12753	6.82662	20.7532	7.25191	4.54514	8.50591	13.4222	13.5117	1.45288	3.47109	4.90089	2.021	1.67765	2.95602	0.398403	2.22161	2.18615	1.03456	0.279806	1.14531	1.91499	3.23824	17.0894	0.671263	1.16111	1.85609	3.59712	17.6837	47.4268	20.1208	13.2721	9.58126
Pita_unigene488	0.681029	0.195656	0.573527	0.703867	1.5145	0.569062	1.38113	0.60351	0.721063	0.503823	0.872885	0.32247	0.561389	0.396007	1.20246	0.888906	0.512864	1.98434	0.311189	0.298849	0.400707	0.410906	0.520068	0.227182	0.280578	0.441211	0.140652	0	0.18875	0	0.257632	0.219054	0.110997	0	0.0899996	0	0.441767	0.450066	0.107306	0.0190086	0.075656	0	0.321764	0.52017	0.10406	0.0192726	0.307623	0.043578
Pita_unigene48700	0.233434	2.78006	4.72724	5.59713	2.15926	2.50332	4.57874	1.61297	2.4767	4.43755	4.07509	3.55431	5.31996	3.46471	1.86989	2.75869	2.24805	5.92438	2.37486	3.25658	3.24029	1.69106	2.64238	1.82279	1.02995	1.01181	1.28256	0.228065	1.01718	0.882044	0	0.962583	0.770741	0	0.890203	0.654242	0.437702	0.524625	2.11077	0	0.432063	0.438839	2.45267	3.21919	2.55244	1.00098	2.07884	1.70619
Pita_unigene48545	10.0393	11.2013	15.534	78.4365	38.2419	32.9481	7.91698	6.71748	12.6283	58.9673	3.27229	15.8512	43.1273	3.16679	38.0642	15.3277	14.6132	7.45406	29.3713	7.69791	9.20808	3.54436	7.28548	12.7841	12.8526	7.6382	10.7767	8.88293	9.4998	5.09423	8.8616	1.74257	3.1438	2.23877	2.22158	6.3278	4.06332	4.80359	6.95255	1.12017	3.94179	5.84884	5.23353	9.14683	9.92233	2.1327	39.9578	0
Pita_unigene48544	4114.95	1809.22	459.49	888.488	754.732	10099.8	677.683	284.065	1118.14	267.52	808.428	1116.29	202.405	963.608	1902.63	542.453	859.001	620.706	322.613	1098.88	3661.56	1740.33	2086.95	2045.96	281.817	972.071	653.608	245.966	1437.06	1045.73	107.278	28.1073	101.619	100.956	23.9896	83.2215	33.3697	54.6446	137.093	42.1343	17.6013	71.3164	1389.84	1019.02	856.789	964.294	693.192	417.158
Pita_unigene4853	4.62587	24.0098	20.3405	18.5803	20.2949	3.27725	4.14367	20.4867	18.7945	14.798	15.6773	2.44685	14.0888	13.6385	10.7438	13.8263	1.59145	2.84407	22.7617	20.2503	10.9043	14.7314	2.13302	1.67667	5.03214	3.48969	4.25371	1.85541	2.4386	3.10639	2.23843	2.3547	3.38668	0.861847	1.29183	3.25935	2.29218	2.51724	2.98252	1.09652	1.47221	1.81102	3.23098	2.7606	2.11505	1.52826	0.973105	2.81397
Pita_unigene48492	5.65975	2.82855	0.657548	2.93923	1.46269	1.37754	1.32104	2.0429	1.86654	0.674999	1.36158	2.87035	3.32405	6.20128	3.7146	9.68457	4.29958	6.69127	1.95422	4.2253	4.51352	1.27902	1.90113	2.44157	10.0229	14.5322	5.88363	14.5385	6.77645	2.64885	18.1596	9.98003	6.24102	22.3268	8.66603	8.54089	9.3243	6.75398	4.79883	4.18074	4.53723	5.92965	0	2.76739	1.41073	0.589597	1.36105	0
Pita_unigene4842	18.6338	7.80452	8.72719	23.639	22.8822	0.905571	19.2952	7.97186	9.61869	20.903	27.3054	0.903033	17.0517	6.72365	8.89999	21.2429	0.541328	17.9938	16.0429	5.00747	8.87063	19.0936	14.6242	0.12496	32.8376	27.356	23.1589	39.8195	49.3219	19.9621	45.6021	72.3199	31.1054	32.4371	67.8504	48.9073	23.4395	20.6031	13.2787	12.2275	20.0679	16.3058	16.0423	14.6731	14.1012	10.9899	18.193	16.7283
Pita_unigene48370	7.13258	18.7508	122.629	18.2243	51.077	95.9416	62.349	33.1625	48.4656	24.0984	60.6393	74.9572	22.5419	38.675	29.5902	56.4976	82.2781	67.7069	7.16528	13.5702	44.3525	54.4712	23.3435	30.8466	21.908	6.33567	12.5854	6.98034	13.5453	11.5595	11.704	5.88239	11.446	7.23189	10.4124	9.6668	26.4171	10.3962	7.58159	4.92583	4.75581	15.1138	14.8101	12.0738	9.04611	3.7974	8.77335	12.0664
Pita_unigene4811	8.99923	4.84212	0.598827	1.0622	1.97081	3.51056	4.41328	0.384955	3.13226	0.663925	0.171926	2.71801	1.2048	0.658771	5.76652	0.316345	2.91646	7.70499	0.682552	0.178148	4.51243	0	2.38557	3.59957	1.77563	0.488365	0.0830081	3.83965	1.03609	0.443095	0.228333	0.556148	0.0982355	0.972015	0.405109	0	0.224542	0.403934	0	0.560357	0.139133	0.197008	1.84466	1.24545	0	10.3665	1.87926	0.324997
Pita_unigene48077	1.68193	0	1.55986	1.73458	1.71326	1.62312	0	0	0.734837	0.80048	2.40795	5.94405	0	2.94408	4.41195	1.63328	0.632832	0.71086	0	1.66237	0	0	1.4809	0	14.5904	1.79887	0.773119	18.043	8.76181	9.32768	8.80569	9.23388	6.48	16.3545	11.0708	0.774453	9.47282	2.62013	2.4167	4.94603	4.60001	0.776166	1.58483	3.25782	0.834372	3.48781	2.39525	0
Pita_unigene48030	81.7214	1.99044	2.77943	2.04571	8.01775	63.998	2.77324	0.94177	1.72304	0.9445	4.71403	3.01379	1.84833	0	1.74018	3.85804	4.46389	0.834091	0	1.95402	0	0	3.45769	3.41385	71.9667	33.6416	22.8491	24.2456	16.5313	186.217	34.2164	0.988562	1.09266	28.4531	22.5448	21.8026	15.3397	7.14068	14.1591	48.3371	5.44645	9.11611	0	2.87526	1.97118	9.87913	23.4128	0
Pita_unigene48027	9.96751	13.5661	2.51959	1.8631	27.5222	29.6199	7.58368	7.71918	16.5213	7.75962	30.1079	28.3041	5.90005	5.54283	23.6968	43.8305	38.6158	7.60518	4.14194	1.7754	30.2835	28.4653	5.52729	38.9598	6.84362	2.87984	4.15906	0.880894	1.572	6.68669	6.03292	6.32491	1.9933	1.67106	2.55377	0.831284	6.22926	6.5301	6.04489	6.06962	7.40164	3.32535	5.10812	2.62301	5.39865	2.99633	6.85284	1.57332
Pita_unigene47993	28.2985	28.214	3.89396	23.5702	12.6138	4.9967	3.87823	4.93946	17.2293	16.847	6.9165	5.28157	19.44	0.911138	19.1415	5.07829	6.2345	8.75046	10.526	1.02191	16.0995	4.70323	5.41845	3.58255	5.63606	2.19822	0.958415	0	0.912986	9.61541	4.99424	4.1528	3.43299	0.962388	0.986899	0	1.78322	0	1.98193	0.875193	4.76487	2.87225	0.986795	2.01114	10.3274	1.72748	1.96419	1.80494
Pita_unigene47985	39.9564	36.7867	37.749	25.0392	22.4292	28.0979	19.0336	23.1691	28.131	29.8969	14.2731	21.3791	18.3292	23.3426	10.9403	25.9441	24.8417	23.9865	40.2844	21.7118	12.7977	16.2382	11.791	12.8119	11.9177	35.3775	0.72227	19.1381	17.0286	13.1004	10.4328	15.737	0.863703	4.35986	11.0502	8.66389	4.09283	16.4339	0	3.29155	4.29481	9.44603	8.13842	18.2896	0.778611	14.962	8.22093	13.0605
Pita_unigene47925	6.70895	13.8278	10.2116	15.1183	6.97144	6.5607	9.55519	3.96494	13.6744	9.59687	7.51643	4.48988	14.7672	5.58513	10.1353	8.63222	8.83664	10.2175	11.8673	6.71751	15.512	6.99599	9.57963	4.37111	8.57216	4.40546	12.0585	5.55284	9.64328	3.18215	6.78175	5.52146	4.45364	4.40567	4.48064	4.41944	7.16665	5.9864	2.01841	1.42446	5.60176	2.2044	13.4727	8.29999	9.36465	11.4251	14.6025	5.81513
Pita_unigene47881	60.4868	28.8241	60.3534	0.53994	1.61381	5.03229	19.3642	78.9271	171.004	11.8552	70.3654	10.4517	4.39427	9.54536	95.1746	40.9676	16.0213	3.62676	7.15209	20.6215	20.9316	61.1864	268.165	58.9248	27.2144	18.6314	48.1394	38.3129	17.9758	25.8719	302.585	59.3519	30.7492	76.5119	23.9829	211.535	115.547	49.9526	149.685	71.1828	27.1657	147.927	36.9018	90.8747	164.005	23.9665	241.293	55.5477
Pita_unigene47799	6.61678	6.56985	5.56459	2.51013	9.97503	5.25818	2.80311	7.55212	1.58815	6.8705	11.0466	18.2719	5.09423	8.4292	4.75225	12.9299	3.69257	8.84974	19.3829	18.581	2.74902	13.0154	8.71328	18.6952	39.5003	17.0031	5.00075	19.9451	5.75245	2.82536	90.1728	58.2396	12.6018	40.7819	26.0815	12.9118	116.216	34.862	7.62869	31.9469	9.92389	1.12154	56.608	44.1513	17.3744	9.07877	12.213	5.87693
Pita_unigene47759	4.98079	11.2768	0.839108	0.473127	11.8107	9.28164	8.48037	1.32692	12.4141	2.59209	16.3006	10.5264	2.57707	0	10.004	20.8776	20.4652	5.19818	6.26868	0.452365	11.2669	16.4084	2.93495	12.1617	2.49068	0.496031	2.50573	0	3.5401	1.70996	0.862671	2.31	2.99174	0.423118	0.429908	0.850246	6.1929	5.46066	2.24688	2.29864	4.18164	3.8211	3.01651	1.33818	4.51219	1.91596	4.43519	5.30307
Pita_unigene47672	4.61394	16.677	6.93819	14.9883	13.3669	1.26098	1.38232	8.57838	10.4534	8.58446	9.29894	0.938047	10.1654	9.32471	11.6911	7.09066	2.24379	2.69789	10.2516	7.51127	11.2824	12.0498	2.97021	3.26818	16.9213	12.5365	13.3647	7.399	16.0836	19.8472	30.3043	16.1765	15.205	7.4201	21.6793	28.2231	13.9118	8.94507	11.687	4.79423	16.5775	8.37035	9.70651	6.5284	11.1722	3.6666	10.4396	10.4999
Pita_unigene47621	22.1236	13.9359	22.4975	14.0953	23.8177	34.2611	4.25493	7.06959	3.70886	3.94687	7.65991	11.0005	5.003	7.53953	9.04802	7.75797	10.1979	9.64389	10.6425	17.4977	7.95575	6.08648	5.77071	11.7963	41.154	17.8687	25.0916	78.8171	30.5194	20.9918	19.7	19.7713	18.1881	27.3923	14.4245	17.0568	28.0331	8.27136	15.0977	24.4623	14.4013	17.3815	10.2292	6.36723	15.6407	9.71001	14.786	9.4121
Pita_unigene476	0.360854	0.503401	5.58209	2.09631	2.79348	1.84049	0.488344	3.35653	0.320116	1.98119	2.88567	1.34841	1.78781	5.70207	0.0647283	3.55622	3.1984	0.134411	0.9357	2.92204	0.133992	2.4951	0.412285	2.53248	12.7723	4.67605	4.32459	16.3812	7.17811	3.65595	9.18433	4.23875	3.45711	10.5831	5.39223	4.99917	7.67788	2.86076	3.20731	8.30621	2.94146	4.49773	12.0082	3.51273	2.07471	9.62392	4.1144	3.21198
Pita_unigene47548	47.4169	80.9345	57.8598	44.663	64.1264	83.0207	42.7916	23.4832	32.9333	27.6343	41.8366	65.7591	53.8156	40.6524	56.0206	47.3049	77.6833	50.677	22.0777	17.0668	47.6326	39.5643	38.9504	54.1794	33.4591	23.8977	35.4574	19.909	28.505	7.11696	9.12122	8.76652	23.3115	6.71424	15.2856	4.16865	16.7715	20.8929	20.8456	12.4471	11.702	14.7118	53.127	14.839	31.955	24.0776	33.9324	12.7094
Pita_unigene47339	6.24928	3.36493	5.24291	2.49005	5.5301	2.03027	6.65895	4.26156	8.22248	3.7652	11.3718	4.49328	4.69789	6.82258	5.01412	10.4229	7.12822	12.3046	1.60571	2.40783	4.08722	5.46284	4.86559	3.98722	3.20308	3.61984	2.24374	0.881063	1.20692	0.695867	2.11581	3.49082	5.0851	0.744796	0.896582	1.1013	3.43919	6.47167	3.24819	0.859782	0.692233	1.60647	4.30834	7.20011	4.70138	3.8238	4.69466	2.40588
Pita_unigene47336	0	0	0	0	0	0	0	0.0680912	0	0.184239	0	0	0	0	0	0	0	0	0	0	0	0	0	0	0.152236	0.223453	0	0.434478	0.0975725	0.0384206	0.61821	1.60698	0.2859	0.735342	0.713578	0.094757	0.103215	0.313867	0	0.4032	0.0318329	0	0	0.0333208	0	0	0	0
Pita_unigene47334	4.26755	6.60164	5.8662	5.66483	28.1874	5.16473	4.19376	6.72145	5.76026	3.32229	5.7169	2.19618	3.47895	7.74757	27.7357	8.36513	3.89769	5.66476	1.86509	5.47155	4.14871	6.27967	2.20053	1.55964	15.4539	10.2008	5.17114	29.9246	17.927	6.0485	28.3089	14.2666	4.37254	31.2239	26.6134	28.1971	7.46292	6.42035	5.16826	9.08478	9.54877	6.22977	3.69503	2.53204	2.57016	3.25058	5.08498	2.94648
Pita_unigene47306	2.05196	2.67514	2.46439	1.15443	2.23826	1.74283	1.45295	2.31135	1.37593	1.49563	0.952657	1.39996	1.57561	2.40927	2.73108	1.65319	0.716266	2.65166	1.40527	1.95537	2.68077	2.01055	2.06345	1.51412	4.7161	5.56337	2.57354	9.88873	5.90824	4.66675	5.3123	8.21886	4.08286	7.48029	7.74534	5.43858	3.97129	5.00961	1.97036	2.91804	2.89761	1.96712	1.27305	2.6677	1.6254	1.6318	1.46468	1.77801
Pita_unigene47270	9.98519	11.3391	14.7911	5.03154	9.19617	7.59871	10.0565	11.2162	6.96055	5.08854	24.7274	6.43108	4.54052	7.83061	11.272	15.1557	6.7801	15.4809	6.25646	6.57842	10.8247	14.9663	11.1079	7.5552	2.77492	19.2293	15.7408	1.02865	1.3855	17.87	3.43954	8.14923	6.78582	1.39104	0.675146	2.2027	5.79806	16.3476	15.592	5.54482	3.32329	9.81922	7.17158	13.2594	13.2504	15.9304	4.00126	7.00936
Pita_unigene47262	9.26471	5.44039	3.99902	1.5409	2.12439	1.38037	4.09259	5.17063	6.26711	4.20514	10.1262	4.05902	5.78373	4.11353	7.36497	5.86615	1.55513	9.8992	3.88417	1.94807	4.11779	2.10634	5.91954	1.78626	5.39787	4.21654	13.1283	1.76564	1.66312	6.37665	3.70839	4.55674	21.7125	5.29233	2.7502	3.19123	11.7285	4.95009	35.6146	12.9096	2.72688	7.71645	9.64348	5.61346	17.5471	15.1558	9.07858	4.27199
Pita_unigene4725	6.51314	5.1958	4.46806	2.00167	6.36233	2.25389	2.97821	4.70725	3.57683	1.90216	4.91867	4.14623	1.78287	0.891775	3.03115	4.55222	0.872488	3.54538	1.66177	0.87651	2.63184	2.25654	1.71404	1.73437	1.78545	1.48518	0.691656	0.0961225	0.38042	0.0908721	0.0472256	0.499461	0.628167	0.139251	0	0.104214	0.553277	0.718561	0.438914	0.0969824	0	0.186578	1.66498	2.25398	1.79445	0.851868	1.3501	0.450795
Pita_unigene47208	7.12711	4.63628	2.81688	3.23712	5.31346	1.47803	4.8989	3.70941	5.02584	3.12374	4.76952	3.51852	3.83782	1.53062	5.32056	5.98024	0.843297	6.54457	4.34528	1.96362	6.57785	2.28495	1.88694	1.5126	3.62435	4.19859	2.84693	1.05388	1.02827	1.40753	1.12237	5.67768	3.20431	1.4704	0.537648	0.893727	3.64875	3.74273	2.70325	2.01145	0.737329	1.64951	3.80706	4.71399	2.76167	2.44167	1.68549	1.62059
Pita_unigene47205	4.6893	4.5563	3.97776	8.67001	6.40466	4.78942	5.30729	3.63083	5.41793	10.2866	3.34838	6.42024	11.8889	3.23169	4.15776	6.34483	5.84705	5.43951	7.36085	2.02786	5.54982	5.4179	4.45435	4.36983	4.33831	3.1022	4.41005	1.70192	2.36717	2.081	3.22526	3.45175	2.41351	1.58821	1.74214	2.1801	2.31434	4.00991	2.78051	1.29299	0.946739	1.93692	3.98699	2.93994	3.19042	2.14376	1.63799	2.83997
Pita_unigene47203	1.15101	1.14242	0.696888	1.06483	0.861765	0.598476	0.930425	0.487368	1.18446	0.732714	0.594105	0.480484	0.644432	0.520649	1.52736	1.14888	0.665818	1.25261	0.265776	0.106497	0.705679	0.242163	0.467724	0.398541	0.831946	0.596688	0.399702	0.284319	0.49618	0.398333	0.229244	0.542585	0.413238	0.289818	0.0616947	0.148854	0.346639	0.750681	0.285469	0.358369	0.258007	0.720572	0.164531	0.812009	0.343964	0.429339	0.841525	0.251361
Pita_unigene47133	1.03024	0.873785	0.352515	0.911277	1.60817	0.49869	0.270135	0.145659	0.277245	0.7653	1.29009	0.345277	1.49653	0.143623	0.897281	1.33468	0.52209	0.677641	0.868763	0.100235	0.367906	0.496557	0.324943	0.33506	0.472222	0.295266	0.118549	0.0352216	0.270493	0.0691223	0.267693	0.144429	0.0591774	0.0343557	0.194772	0.0170667	0.663831	0.754639	0.186299	0.152485	0.407443	0.101113	0.61826	0.172598	0.139071	0.126386	0.671933	0.191151
Pita_unigene47115	6.01978	3.66134	5.04572	3.13119	9.59403	4.10442	3.40036	2.64479	2.87318	2.1835	3.00829	3.23934	1.75639	1.72816	4.80948	4.42242	1.2597	5.15078	1.53271	1.58652	2.58608	2.13257	2.31919	1.55653	2.78331	2.92541	1.36053	1.22559	1.87003	1.18098	1.18176	1.83442	1.40403	0.582128	1.08654	0.800246	1.13809	1.97445	1.45944	1.00524	1.09225	1.1245	1.86762	2.94122	1.59238	1.51578	2.89206	1.36215
Pita_unigene47100	0.246101	0.707272	2.00234	2.31199	1.74759	2.50306	1.12382	0.0786108	0.775503	4.58213	1.63608	1.14147	4.71498	0.345012	2.95394	0.894345	1.63519	1.78298	1.65562	0.0922792	0.348923	0.543992	0.221544	0.837124	1.25201	0.396978	0.215115	0	0.459863	0.641431	0.109816	0.0641018	0	0	0.0769593	0.200151	0.408092	0.266607	0.709132	0.28145	0.318027	1.02503	0.891407	1.28313	1.00232	0.517144	2.32168	2.63624
Pita_unigene471	10.014	20.722	26.6546	35.2986	22.192	29.6	21.9252	9.70605	27.8934	48.6827	57.026	30.4364	41.3216	8.10924	25.1169	26.7984	32.153	22.6858	35.367	5.72178	21.1211	24.6779	14.7902	26.534	29.3975	18.6288	19.3311	0.188172	5.77588	10.6402	22.7137	6.19259	10.4941	0.152642	3.09018	6.32675	15.7832	11.1316	11.0473	0.257875	2.33959	8.83572	42.0783	23.1889	20.1312	2.29418	12.5316	14.0518
Pita_unigene47085	1.54806	0.677768	0.649952	0.122161	0.824351	0.59209	1.17693	0.19463	0.418614	0.520551	0.454263	0.480928	0.410706	0.374187	0.862131	0.827954	0.591268	0.957586	0.186064	0.231145	0.109568	0.583319	1.18504	0.64924	0.928497	1.17814	1.06273	3.76153	0.376884	1.16416	1.41318	1.33572	1.06859	2.58875	0.552614	3.71313	1.00953	0.815636	0.978243	3.94707	0.370651	1.4385	0.563824	0.876748	0.775445	3.09694	0.440891	3.76708
Pita_unigene47056	8.12492	5.00978	2.7639	4.41947	3.32026	6.42032	2.231	2.04757	2.28042	3.28126	3.14837	6.0693	3.15346	1.31601	3.31191	3.02346	6.85508	2.24326	3.12365	1.75748	1.83486	3.49624	2.17514	4.35968	12.1153	11.116	4.02494	4.93131	4.34023	12.8433	13.702	6.42733	3.79922	3.35128	3.47112	5.27049	19.3307	11.1533	16.8224	9.18738	3.96059	5.41903	7.48401	6.11422	3.775	4.3026	5.74689	5.12871
Pita_unigene47048	32.971	14.8113	23.4944	28.112	11.416	11.2747	16.4746	15.8198	10.418	14.3278	11.216	6.61426	18.8821	15.1039	22.6026	8.85059	9.71877	26.1462	11.0389	6.98197	11.4492	3.35043	12.9413	2.37798	1.40446	5.31868	1.75769	1.52647	5.61854	7.44199	0.716883	4.04315	1.05208	1.39241	1.40076	1.92949	0.716354	2.45989	2.84346	0.915464	1.4476	6.28964	0.0459443	3.61853	0.532598	3.78945	4.65397	3.59979
Pita_unigene47027	0.04491	0.0783448	0.443954	0.372375	0.62442	0.188039	0.159384	0.0222801	0.199685	0.212623	0.0649061	0.0114705	0.0747792	0.0291588	0.899119	0.210303	0	0.359104	0.218869	0.0329783	0.0313664	0.0102572	0.0215029	0	0.274002	0.0354831	0.0103435	0.0111805	0	0.0105123	0	0.0115736	0	0.0108009	0	0.0206164	0.0214268	0.0892414	0.0226633	0.00958861	0	0.0217443	0.0215061	0.0217462	0.0110736	0	0.0338702	0.0839504
Pita_unigene47020	4.22856	19.1111	40.8856	47.4002	12.5731	19.136	71.8011	80.9136	123.114	180.833	157.247	80.5862	98.3623	66.9938	41.2259	63.0421	52.0005	68.1221	177.605	10.0998	27.518	49.4719	71.9681	61.5799	19.9061	25.1409	13.5741	0.826155	7.5832	2.32027	51.0434	33.4215	46.1748	0.764243	5.80025	10.2305	19.4238	25.0937	46.7826	2.23534	0.892073	11.0636	132.26	147.538	31.9091	234.851	101.956	37.5827
Pita_unigene47019	0.314478	0.178972	0.785103	0.559248	1.50404	0.0883307	0.424116	0.445374	0.319301	0.255301	0.779855	0	0.854426	0.584	0.282387	1.0627	0.037678	0.84014	0.416754	0.0882076	0.250712	0.368778	0.257466	0	0.248925	0.237701	0.454696	0.0445879	0.0784059	0	0	0.138958	0.342522	0.129191	0.0431356	0.0413689	0.128309	0	0.271748	0.0383428	0.124941	0	0.0860206	0.087288	0.133123	0.0399113	0.0450489	0.0418242
Pita_unigene46985	7.2664	4.65449	5.51759	6.04383	5.72418	2.72455	3.80596	2.8179	2.71716	3.50901	4.923	1.68936	2.70279	1.68294	4.29339	5.17671	1.11895	4.54808	1.90243	1.44686	2.64403	2.29766	4.60727	1.09589	4.94439	4.10621	3.74135	1.21495	3.42209	3.0011	2.17762	1.63181	1.9578	0.655775	1.1057	0.430281	4.48698	2.93806	4.60114	1.16686	1.96777	3.04838	3.1687	2.72353	3.23208	1.66511	3.39322	2.54784
Pita_unigene46933	19.1031	7.23205	3.39914	13.6315	33.1592	22.9952	4.40629	5.4467	4.32295	10.0501	16.624	12.0742	16.6481	6.13583	10.4304	41.7549	14.5551	10.5643	11.1239	13.5467	6.86826	56.324	10.7089	12.4062	14.5391	29.0961	40.9883	91.6598	43.6046	9.46394	23.7557	84.1161	71.7293	87.2476	49.2886	16.5758	53.5034	52.8388	115.999	81.1483	64.306	25.2463	6.61285	15.4866	40.9838	4.84457	16.0523	13.5723
Pita_unigene46898	3.58499	5.61218	3.74637	2.1397	1.8053	2.24657	6.91919	7.05901	11.993	7.04669	7.43302	7.32375	4.9954	5.75373	6.74195	7.62146	4.77212	5.34162	6.21794	4.32786	8.37782	5.3741	8.26606	5.1234	8.11264	14.5858	8.50486	10.2342	6.60749	4.98569	14.5461	32.1223	22.4598	14.429	12.8976	14.9868	26.5076	31.4472	27.496	14.9663	13.4167	15.2728	12.6058	16.6158	12.2542	10.6963	6.56892	4.92057
Pita_unigene46886	46.4298	22.0724	28.3981	21.0989	42.7941	27.0637	32.9852	18.2295	20.7801	28.2821	40.9079	38.3043	20.3832	13.1352	25.01	38.9527	29.3758	27.2312	24.3882	6.83209	14.9536	31.4838	28.9932	45.4082	7.72334	8.48318	14.0106	2.78931	5.20063	9.29932	3.22138	6.22592	7.08984	4.95057	3.32452	3.99459	1.19657	5.74503	8.42393	5.56691	3.83442	7.10177	14.9629	13.95	13.0396	33.0098	13.7038	16.8713
Pita_unigene46879	2.01546	0.169591	0.276804	0.325561	0.638793	0.103135	1.0898	0.0908938	0.0931005	0.185886	0.0252206	0.0267399	0.0996159	0.0339911	0.164845	0.103216	0	0.750749	0.242968	0.0512625	0.0487465	0.131508	1.55381	0.0569782	0.47906	0.137904	0.0120561	0.0260604	0.0685616	0.049019	0.538209	0.0809456	0.0995629	0.0629383	0.012584	0.0480709	0.212271	0.0891574	0.0396239	0.0670596	0.024277	0.0126696	0.889919	0.164794	0.116182	0.0468395	0.210532	0.171213
Pita_unigene46867	0.155375	0.0759506	0.118055	0.158537	0.482691	0.16455	0.148688	0.0476564	0.221851	0.131051	0.201895	0.039363	0.0885247	0.079655	0.398762	0.225335	0.101339	0.165729	0.0774726	0.0319693	0.111496	0.0680376	0.132456	0.0758213	0.109033	0.0481203	0.1303	0	0	0.0305723	0.0629581	0.145857	0.165581	0	0.0314	0.0117761	0.0367814	0.17502	0.0988684	0	0.0357317	0.0737825	0.115786	0.22183	0.181498	0.0799856	0.10858	0.0451258
Pita_unigene46850	0.398267	0.178546	0.131412	0.953096	0.465079	0.181667	0.215535	0	0.37638	0.218928	0.575877	0.158063	0	0.135709	0.282571	0.159357	0.671668	0	0.355914	0.131524	0	0	0.230651	0	0.184689	0	0	0	0.543421	0	0	0.652547	0.146069	0.141324	0.266474	0.275163	0	0.427206	0.180221	0.278857	0	0	0	0.191904	0	0	0.195377	0.819848
Pita_unigene46841	1.39172	0.893508	2.84963	0.371893	5.82499	0.350096	0.811858	3.92825	0.629634	0.15731	0.661977	0.608385	0.183972	1.34171	0.380572	1.57966	0.269034	0.879286	0.0705647	1.87338	0.251867	0.655754	1.51295	0.70816	0.406467	1.34145	0.241277	0.20482	0.155	0.1299	0.0340344	0.925909	0.18388	0.107921	0.125915	0.0343824	0.0994177	0.927057	0.18881	0.159784	0.0867694	0.217191	0.0997221	0.663636	0.203078	0.5197	0.450268	0.129911
Pita_unigene46826	2.95498	4.53469	7.26388	4.14221	1.55965	2.97415	2.55074	3.63432	3.56587	3.55355	1.56936	3.15279	3.12913	2.50757	2.37028	1.38197	3.44761	3.07172	2.0324	1.45642	1.60865	0.875651	3.48934	2.1731	2.78852	2.71663	3.34116	0.422406	0.888505	1.69179	1.7235	1.51762	2.48681	0.270749	0.357448	1.30671	1.30973	1.58579	2.43166	0.68337	0.1134	1.72031	3.52082	2.10682	3.65109	2.70453	1.70264	2.08938
Pita_unigene46812	4.081	6.94147	6.82331	16.0682	6.35377	7.66264	3.87669	3.67183	9.50191	13.4557	8.29837	8.15051	21.6111	5.27156	11.4336	8.17101	12.3476	4.87416	14.7127	3.57861	14.3722	7.17015	4.69551	7.1053	2.62903	3.10421	6.71562	2.29944	3.51748	1.44899	2.9566	3.35319	10.0455	1.2906	2.33674	1.18966	5.49293	5.59675	11.1631	2.14259	3.53825	4.93235	4.44227	3.13223	15.4397	2.05	6.98946	4.54666
Pita_unigene46802	0.334609	0.48844	0.61971	0.216236	0.663524	0.335665	0.144022	0.316197	0.277967	0.0863895	0.231105	0.104475	0.11657	0.302695	1.40713	0.313233	0.170579	0.168754	0.0300648	0.278019	0.242271	0.0733935	0.174903	0.104843	0.313973	0.0480024	0.204555	0.0415715	0.0527275	0.0562648	0.157672	0.0313571	0.167762	0.0383308	0.0783237	0.0432642	0.0726342	0.0345594	0.293333	0.0537763	0.045715	0.172998	0.215777	0.117744	0.254921	0.0545699	0.29453	0.0996179
Pita_unigene46783	0.591819	1.87698	1.17925	1.78968	1.0625	0.455504	0.489596	0.630554	2.04483	1.8915	1.09899	0.340558	1.17044	0.324895	3.21466	0.591308	0.171566	0.843817	2.01731	0.141262	1.65616	0.315186	0.638756	0.250925	1.2031	0.132614	0.267668	0.0575778	0.258873	0.648712	0.490226	0.774732	0.439114	0.071065	0.213285	0.264888	0.524095	1.06344	1.01995	0.126325	0.0686011	0.527732	0.920925	0.888758	1.08218	0.528155	0.83453	0.405377
Pita_unigene46768	13.121	10.821	76.4557	0.11687	1.39056	3.54052	5.31176	45.5415	53.6148	6.61425	17.6554	13.5028	1.3385	3.85678	31.2286	28.8593	12.0537	0.840767	2.0891	15.6594	2.14658	21.1494	55.7305	20.7273	10.9794	8.8329	38.7921	22.5541	18.7677	20.29	175.233	17.8838	6.38386	39.7349	13.9969	84.0896	106.175	19.0212	266.784	27.005	15.2407	72.7358	27.438	19.4964	129.665	14.8706	196.605	22.042
Pita_unigene4675	0.315428	0.109729	0.264569	0	0	0.119068	0.0619428	0.237805	0.297707	0.0530945	0.0781674	0.176481	0.0890354	0.0152602	0.331255	0	0.2278	0.070242	0	0.0866305	0	0.0237891	0	0.0655851	0.436517	12.5534	8.24448	0.403139	0.205765	0.278611	0.211377	16.35	13.6928	0.285566	0.597431	0.0369871	0.257657	12.0602	14.3537	0.25231	0.30079	0.130565	0.200606	9.14898	7.27914	0.111145	0.172767	0
Pita_unigene46729	0.0812898	0.116763	0.635947	0.188781	0.477561	0.111981	0.121371	0.0806797	0.0653861	0.129256	0.0696867	0	0.121377	0.0586228	0.475941	0.150036	0.0230028	0.203815	0.0575509	0.0568116	0.0626345	0	0.0395807	0	0.147646	0.164964	0.0320047	0.0221505	0.0236644	0.021572	0.181079	0.17715	0.0259812	0	0.00993641	0.00948584	0.13516	0.13678	0.0279077	0.00882451	0.0421097	0.0595432	0.0593766	0.0824762	0.0125395	0.0121581	0.0623458	0.0386337
Pita_unigene46703	0.491237	0.511793	0.410691	0.555589	0.5463	1.91249	0.380064	1.12959	0.813857	0.909225	1.80772	0.957814	0.67973	1.39226	1.26491	1.01251	0.753644	0.649861	0.642414	2.3413	0.581985	1.48834	0.470013	0.699833	2.84753	1.55479	1.19262	2.39879	1.03311	3.3468	8.99744	2.23282	2.42824	4.99906	6.43835	4.90442	3.00194	2.07815	5.3616	4.53759	2.65049	1.48942	0.555949	0.389636	1.21184	0.398747	1.18893	0.625279
Pita_unigene46688	12.9271	16.9498	1.26023	26.7606	2.72777	3.19008	10.798	0	8.20499	20.1987	1.15715	4.5385	26.2784	0.371446	16.7964	1.43413	4.75892	13.9884	43.4098	0.421628	23.9318	4.83202	15.7351	5.36172	1.13719	0.455511	0.943736	0.0846357	0.447932	0.884839	0	0.0882961	0.0935119	0.245151	0	0.158248	0.325115	1.25998	1.81018	1.46017	0.237969	1.88556	1.55661	1.50282	6.35311	10.327	9.07023	4.52209
Pita_unigene46678	0.97379	0.401435	0.679421	0.731288	0.62628	0.462484	0.475898	0.765866	0.298418	1.90805	1.35967	0.308557	1.022	0.407257	0.422425	1.98591	0.536712	0.59777	0.841236	0.82338	0.374937	0.214505	1.86185	0.438435	0.85615	0.425755	1.11273	0.200186	0.644772	2.20312	0.918283	0.276949	0.401994	0.35449	0.290319	0.957588	1.85556	1.5619	3.38652	20.2089	3.6427	8.29592	0.417973	0.814668	1.8233	1.61497	2.96588	0.469538
Pita_unigene4667	1.1066	0.783407	0.535638	0.785109	1.34192	0.917021	1.10094	0.750906	1.08709	0.882496	1.93694	0.981294	0.747889	0.30269	0.732883	1.6936	0.441489	0.983033	0.621525	0.428288	0.650423	0.850591	0.751908	0.583056	0.419722	0.984028	1.76947	0.752636	0.330445	0.409334	0.626062	0.840608	0.982184	0.503301	0.111923	0.160671	0.721591	0.627823	1.4393	0.745847	0.324032	0.42184	0.167308	0.649719	1.26474	0.389434	0.409353	0.0543218
Pita_unigene46656	1.09855	0	0.243298	0	0	0	0.210809	0	0.190841	0	0.627694	0.243043	0.205043	0	0.576954	0.850455	1.39056	0.817679	0.199694	0.214691	0.999003	0	0.827646	0.274922	0.2383	2.14544	1.38426	20.1358	1.67778	3.76593	0.620316	3.35323	0.999642	10.169	1.04652	8.0542	0.451535	0.728556	0.216876	5.14656	0	4.87761	0	1.69933	0.428901	5.1955	0.855186	5.13433
Pita_unigene46646	1.66354	2.3634	2.68305	2.76114	8.67095	2.23188	1.6397	0.758896	1.68454	0.915994	0.69423	0.533141	0.956736	0.650152	6.89689	2.60111	0.484568	2.87401	0.425352	0.311596	1.24452	0.418594	0.877492	0.243831	2.49907	0.710814	0.433851	0.253467	0.555682	0.405228	0.361446	0.406749	0.25015	0.0489717	0.13463	0.058439	0.461487	0.621448	0.561961	0.0217403	0.177085	0.628463	0.707043	0.628749	0.841175	0.34169	1.45895	0.344943
Pita_unigene46624	207.49	466.23	412.795	552.846	1061.51	426.112	106.45	380.527	296.081	359.898	477.994	343.438	486.448	521.533	490.766	600.15	207.096	80.1611	316.746	260.818	533.005	313.095	83.3786	211.826	270.762	229.677	416.247	141.599	118.632	75.6812	38.3852	103.935	185.764	77.1003	209.689	35.8019	31.8579	48.2103	88.272	67.0806	80.2067	31.6578	399.189	196.692	170.228	158.375	30.3315	56.5559
Pita_unigene46614	2.98435	0.274892	0.955778	0.241574	0.279102	0.400211	0.608872	1.61441	0.179202	0.461461	0.320272	1.23558	0.73225	0.81286	0.192245	0.565911	0.558687	1.50136	0.626026	2.0388	0.0581075	0.421566	1.41378	1.53991	2.18962	3.04839	0.298169	2.11151	0.358698	4.83652	1.84427	4.31605	0.699257	2.41212	0.226525	1.38216	2.18152	3.78597	1.19242	3.89972	0.636259	1.94017	0.924517	1.55773	0.831977	3.04013	0.36672	1.00666
Pita_unigene46613	14.2741	1.33608	1.0101	0.189934	0.060334	0.374362	6.83431	2.21426	0.43339	0.45117	0.494167	0.974922	0.0579965	0.330857	0.0547265	0.0659582	0.285077	3.68487	0.226295	1.14582	0.409462	0.506179	9.37877	0.833834	0.277801	0.265774	0.973137	0.0682623	1.36684	0.128464	0.423938	0.438531	0.34305	0.0678308	0.468261	0.18249	0.820901	0.55308	0.440774	0.260253	0.169617	0.11726	1.81021	1.32035	1.04027	0.324016	1.88747	1.13161
Pita_unigene46601	12.5332	6.83909	2.15402	3.83406	5.28569	3.33792	1.80713	0.978308	2.42942	1.8289	2.27715	3.21077	3.01013	0.85402	4.50838	4.11158	2.48037	4.74676	1.77344	1.10723	1.58754	1.46344	1.45493	0.948078	2.21019	1.3653	1.36238	0.449709	1.14797	0.750589	0.884372	0.423615	2.21176	0.414667	0.849221	0.358707	2.56668	1.35265	2.36327	1.42106	1.60056	0.913918	0.767361	0.916087	1.07446	0.88094	1.32126	0.728939
Pita_unigene46590	2.356	2.50916	4.32576	2.07615	3.01358	1.65191	1.81766	2.672	1.42639	1.12172	1.7889	1.29716	1.02378	2.05293	2.17451	1.62939	1.22731	1.94427	0.888223	1.68561	1.59791	1.45432	0.883347	0.774897	1.76826	0.651484	0.530474	0.440577	1.01424	0.7261	0.268201	0.0361587	0.136132	0.150117	0.378201	0.489014	0.280764	0.250341	0.222956	0.242585	0.726939	1.1255	2.68015	1.31779	1.76685	0.703997	1.77967	1.30548
Pita_unigene46586	0.182297	0.211814	0.868337	0.0703248	1.06751	0.205949	1.28029	0.279872	0.37704	0.204501	1.14208	0.13015	0.209891	0.341455	0.652577	0.375194	0.615251	0.702662	0.0613221	0.170604	0.249313	0.55182	1.02555	1.5791	6.24236	2.01087	1.57332	5.40752	4.52401	0.462772	9.04412	4.39699	5.85941	6.10434	8.33556	2.56873	2.74267	2.35447	3.02691	2.06789	6.45753	0.450063	2.08937	1.74582	2.71716	2.55295	8.24279	0.724022
Pita_unigene46582	9.8879	9.57694	12.1253	2.27878	2.35964	5.13376	5.96844	8.81781	26.8194	4.45458	8.01035	13.5656	3.98384	13.2657	14.7151	3.65488	20.4734	4.43859	1.01939	1.4481	7.79469	1.28455	2.00201	7.91953	7.61178	5.98618	3.98191	0.886883	2.84672	0.675802	11.0981	5.16783	15.8064	0.395368	1.68202	0.94757	5.42972	14.606	10.5952	0.322392	0.827656	4.00871	36.1279	35.4866	12.2366	13.8497	9.57926	3.7443
Pita_unigene46558	3.32927	1.63372	2.82283	2.39335	2.40026	1.86769	2.03857	1.71998	1.06746	2.12022	2.16207	1.80864	2.77382	2.15591	3.10606	3.36075	2.01546	3.11048	1.43484	1.96166	0.929826	2.22156	1.77444	1.21925	1.28779	1.57263	1.23983	1.48491	1.01274	0.639118	0.327716	0.663612	0.282449	0.462104	0.496521	0.356302	3.99537	4.53225	3.09441	3.96802	1.74024	3.10873	1.60703	1.87094	1.95986	2.47343	1.60306	1.27087
Pita_unigene46549	11.2038	13.5813	11.0573	3.45906	9.17439	4.07502	10.3742	17.0642	17.4036	10.241	19.6135	6.34462	6.75866	9.59036	14.3927	20.6533	5.82124	13.8866	6.00187	7.19908	5.58004	7.80116	6.94018	4.32037	9.35368	11.5449	5.7951	2.0904	5.29406	4.61276	16.5783	17.4133	20.2986	2.63952	10.7604	10.1133	14.6291	13.6285	19.9132	4.75178	7.71186	8.28055	12.0683	39.2836	14.2992	17.8222	46.5692	10.3135
Pita_unigene46533	0.643002	0.292581	0.225341	0.251609	1.63654	0.255737	0.0621583	0.104604	0.344406	0.128857	0.599954	0.456414	0.274594	0.0858736	0.450164	0.913854	0.323614	0.47155	0.294805	0.0476005	0.214328	0.863706	0.181745	0.535116	0.526585	1.45377	1.1679	0.212472	0.522555	0.866707	0.948593	1.72462	0.750619	0.393115	0.685809	0.902834	1.25917	1.66178	1.62336	0.170005	0.404638	0.868361	0.417024	0.638101	0.532365	0.150204	0.243841	0.615843
Pita_unigene46505	0.467047	14.9962	24.181	18.0752	33.373	24.1047	5.84846	9.65179	25.5917	25.2185	8.10543	17.9674	22.5156	15.2756	46.1902	15.32	16.9678	6.49458	12.2497	21.1278	49.6669	12.2188	1.46337	10.4486	13.8155	11.965	4.2938	10.1098	5.64535	0.626352	4.02379	20.4336	2.11063	14.8035	2.56001	1.72359	4.31291	21.5435	1.20988	10.6442	2.03166	4.10035	12.0058	18.0561	2.63861	4.01114	8.52636	6.62944
Pita_unigene46503	2.7862	8.97341	3.08005	6.04071	7.19988	5.40086	2.84637	0.586158	2.85172	1.75904	1.51921	2.09794	2.94473	0.463159	5.6666	4.74385	2.84522	3.72163	3.05561	1.32442	8.19816	5.08662	2.04559	1.64148	2.43388	5.37839	11.1159	1.73467	1.94072	1.08124	0.825165	1.13154	1.80645	0.243229	0.540853	0.181142	1.79719	1.75645	1.53298	0.240275	0.469741	0.652386	5.38979	4.0401	4.1945	1.25482	1.58258	3.62281
Pita_unigene46447	0.328836	0.226852	0.767672	0.15736	0.445944	0.423267	0.239142	0.953386	0.314792	0.479083	0.365717	0.413317	0.457179	0.722952	0.295632	0.623364	0.40521	0.379765	1.17372	2.45459	0.258981	0.531142	0.459738	0.726697	0.589005	0.453854	0.675446	3.34549	0.94948	0.165896	1.6322	1.25169	0.935463	5.68564	2.62535	1.06962	1.25391	0.775075	1.76073	4.1898	1.73578	0.537727	0.702445	0.686803	0.89869	1.64766	0.863809	0.542872
Pita_unigene46399	6.06604	7.31773	3.71336	3.45213	3.78774	2.24864	4.13827	1.09029	8.99222	4.43931	4.74241	2.19725	5.08053	2.30728	6.27825	6.22354	4.13359	10.1854	1.90141	0	2.63089	2.69543	3.10643	2.11336	0.593126	2.55235	0.523214	0	0.56962	0.24184	0	2.41013	2.04837	0	0	0.68903	0	4.85959	2.27734	0	0	2.15012	1.37775	7.16323	3.64865	2.4035	0.480813	5.12327
Pita_unigene46393	9.08457	11.0837	11.8645	8.24717	9.61385	14.3312	6.2071	12.6739	8.18184	8.55442	10.9478	14.2632	7.99283	9.85489	9.17708	12.4054	9.85896	6.78114	8.30399	7.47649	7.92467	8.77014	6.62451	9.05239	3.83681	15.1999	9.52633	0.214012	4.44976	8.9695	1.66097	5.5963	3.45427	0.181924	1.54385	2.50005	3.19612	14.0181	14.2631	1.38073	4.2109	7.11633	6.78232	10.7229	10.5737	6.21671	7.52361	5.44955
Pita_unigene46357	8.91799	5.79846	5.56711	2.6227	11.3786	14.0737	6.89418	6.54812	5.41227	3.57084	6.78948	9.33871	2.88063	6.92856	5.23202	6.60055	8.65736	6.77562	1.97686	6.07667	5.33524	6.41553	6.72714	8.74649	27.9167	25.8755	17.2466	19.2182	26.8002	15.2768	20.4293	19.5361	14.2298	10.7841	21.0959	13.5036	13.71	21.0145	13.4939	11.0852	16.8978	13.2016	13.4393	13.5891	10.2793	8.31687	13.9852	10.8954
Pita_unigene46337	13.2391	20.0334	21.7411	25.3363	26.1169	48.6308	16.7095	11.0667	13.4091	13.7173	16.5427	29.9372	20.9691	13.1148	23.2225	20.9522	38.6271	18.0329	12.1499	9.42048	29.9765	18.2779	18.1963	21.7443	6.92761	6.5428	12.5827	0.597367	4.64121	4.57377	1.37972	2.35911	5.15833	0.157338	1.10387	0.858133	1.71955	2.17297	4.45017	0.607576	0.812253	3.11234	19.4465	13.1476	17.1837	5.63141	10.5197	11.469
Pita_unigene46312	0.08724	0.328919	0.435272	0.364567	0.181348	0.154385	0.147707	0.0808689	0.0814066	0.261271	0.217778	0.294155	0.111657	0.0575329	0.316776	0.250968	0.266276	0.175172	0.138735	0.0868062	0.0378968	0.168045	0.15019	0.140726	0.0458718	0	0.0291543	0.0207412	0.111861	0.0474716	0	0.0231288	0.0675439	0.0191356	0.0174924	0	0.236039	0.0992893	0.470276	0.0384492	0.0667087	0.0698521	0.0492333	0	0.238439	0.0651542	0.0730776	0.0679504
Pita_unigene46299	0.311581	0.935788	1.74494	0.129909	0.464437	1.00352	0.320783	0.421858	0.752863	0.449257	1.27474	0.8625	0.43973	0.64054	0.745176	1.93649	0.499707	0.513579	0	0.354098	0.522952	0.473041	0.428242	0.707077	0.387978	0.253683	1.16827	0	0.47754	0.358832	0	0.0764442	0.592534	0	0	0.0668497	0.398702	0.0706201	0.419429	0	0.163533	0.125923	0.246202	0.374402	0	0	0.24129	0.189858
Pita_unigene46271	0.0867137	0.29398	0.366151	0.275144	0.792128	0.130726	0.139527	0.1902	0.173556	0.181532	0.45472	0.301292	0.126275	0.204284	0.650052	0.581512	0.100689	0.221821	0.177949	0.072213	0.141371	0.0594474	0.19765	0.0566402	0.37621	0.114016	0.119881	0.205521	0.141631	0.0966684	0.106304	0.0912107	0.144258	0.0567253	0.104284	0	0.165613	0.167427	0.196989	0.148144	0.109419	0.0999077	0.12459	0.128575	0.0872821	0.0389078	0.152738	0.11022
Pita_unigene46214	0.632055	0.552291	1.33779	4.44794	2.34033	1.27709	0.77228	0.321114	0.367322	1.14439	0.221456	0.0752507	0.840882	0.577526	1.46638	0.727427	0.335105	1.4087	0.388271	0.231125	0.173843	0.119557	0.483048	0.240462	0.806128	0.155252	0.597123	0.0673327	0.220061	0.532071	0	0.0569336	0.286846	0.0709205	0.0708424	0.145737	0.272666	0.0674871	0.613116	0.050592	0.136617	0.281311	0.348084	0.111477	0.390572	0.396463	0.413282	0.311153
Pita_unigene46196	1.54776	1.96977	0.672242	0.89195	1.31166	1.14132	1.01483	0.895106	0.802164	0.814395	1.61693	0.965458	1.1039	0.409824	1.50581	1.27126	0.721526	1.52815	1.63527	1.01281	1.43968	1.17651	0.780361	0.898039	0.524113	1.1371	0.67254	0.0426785	0.337665	0.201576	0.377477	0.531922	0.608675	0.0824404	0.330273	0.0791662	0.163743	0.58509	0.130039	0.440342	0.239143	0.0414322	1.11136	1.08575	0.806788	0.343902	0.344948	0.280242
Pita_unigene46193	1.26002	1.63715	1.1103	3.40399	1.69379	3.81386	1.16722	1.03106	2.37688	3.04544	0.817797	2.35155	2.36911	0.517929	2.79347	0.861386	2.90195	1.93774	1.5236	0.288438	1.52629	0.381439	1.31298	1.41561	1.08893	0.694186	0.943363	0.943509	1.91227	0.949176	0.918161	0.61545	0.408579	0.389587	0.803556	0.10414	0.807811	0.676134	0.602666	0.643134	1.15851	0.534125	0.874926	0.40155	0.673244	1.39791	2.01574	0.627779
Pita_unigene46160	7.28131	4.36159	3.81031	5.18291	4.11279	4.81885	2.16675	2.36611	2.79223	3.4313	3.45872	2.37589	1.97435	0.959362	2.07512	1.36228	0.717919	1.58173	2.33986	0.872455	3.02306	1.9991	3.24968	2.54374	5.67297	5.32191	3.67916	3.75169	3.632	6.75133	4.72565	5.88391	3.96815	1.95335	3.01898	5.34345	4.39587	4.02633	5.15589	3.75433	2.58352	5.56618	1.98133	1.96871	3.04527	3.25072	2.15479	2.44281
Pita_unigene46085	0.201604	0.695579	0.754498	0.562625	1.2119	0.702605	0.249424	1.31293	0.372305	0.376444	0.268986	0.332676	0.324598	0.651179	0.53866	0.901991	0.235975	0.451897	0.493833	1.39978	0.577574	0.552426	0.267221	0.486102	2.37728	2.20498	0.542819	4.65059	1.13735	0.188799	4.22967	4.82958	1.9891	4.41108	3.96602	1.53653	1.47997	2.14632	0.735531	1.89541	1.68282	0.465229	0.66075	1.11631	0.550738	0.819176	0.498929	0.492567
Pita_unigene46083	2.34027	2.39614	1.83827	1.10382	1.32086	1.07241	1.59554	1.99337	2.28244	1.44588	1.88774	1.34438	0.84652	1.06221	1.48466	1.35113	1.14191	1.80267	0.652724	0.77222	0.983137	0.87616	0.790204	0.656942	1.11074	1.96528	1.03856	0.3996	0.406246	1.39758	0.552718	0.504033	0.367816	0	0.109269	0.828092	0.549072	1.49894	0.903828	0.408751	0.0975204	1.20201	0.876144	1.20985	0.532643	0.890835	0.462165	1.43258
Pita_unigene46060	42.7842	26.7169	40.0832	19.5281	18.1285	19.4512	37.3846	47.8833	44.3482	44.4804	41.8813	46.4989	15.141	15.4594	13.1766	21.8324	19.8959	23.0925	25.5649	12.6089	21.4495	21.9529	25.3675	26.2276	17.9109	20.8638	26.596	9.10247	13.4008	13.6911	17.1843	15.6157	22.5309	7.94487	13.1844	12.533	13.7052	9.75894	17.6923	11.8544	8.59926	9.29937	32.3284	30.6576	32.2861	26.4144	25.0893	25.7014
Pita_unigene46056	0.290012	0.564813	0.651998	0.374641	1.16403	0.618928	0.312851	0.478542	0.567537	0.366201	0.22048	0.296283	0.168636	0.257534	0.733845	0.199099	0.258771	0.33319	0.224349	0.159935	0.144316	0.0883115	0.215946	0.308662	0.160847	0.254791	0.267161	0	0	0.0591066	0.0630872	0.265773	0.132638	0.0309868	0.0309835	0.0960456	0.0614827	0.188274	0.243906	0	0	0.218289	0.108023	0.171733	0.190754	0.172894	0.14551	0.117739
Pita_unigene46053	24.0758	2.27192	1.57615	5.73328	4.65451	4.38352	11.2782	1.60182	2.44818	3.33681	2.11368	6.78891	4.24978	1.73478	2.81188	6.00166	1.89013	12.4363	3.08649	1.96975	1.67872	3.81002	26.0821	2.5656	2.31704	11.2544	24.381	10.9037	2.24025	4.11471	2.67543	8.53973	9.15223	14.0648	1.82338	4.4892	11.7369	8.83132	22.223	14.768	7.40518	9.37322	4.82595	9.38111	20.6293	17.0577	4.65722	2.90689
Pita_unigene46	4.6695	10.302	106.651	81.603	73.4446	467.586	23.4915	81.4513	18.2776	59.623	4.71848	220.633	41.0635	54.4917	78.2467	46.0551	204.142	23.8053	4.93379	15.4231	14.5104	9.39181	14.8459	81.0155	134.433	0	0	0	13.5447	63.4761	14.1108	10.8308	0	0	0	19.2035	4.97871	6.06801	0	0	4.55895	4.86464	14.7166	0	4.18439	0	10.2993	28.7154
Pita_unigene45945	1.51	0.853833	1.37037	0.567714	1.22543	0.469473	0.824087	3.05578	2.33664	2.33612	2.06503	1.35585	2.10402	1.09246	2.62291	1.75401	1.27259	1.40842	1.12236	1.33407	1.33925	2.32341	1.43174	1.49403	2.00707	1.69184	0.740835	3.85359	2.50591	2.45925	8.01559	6.54468	2.96032	12.8453	7.55894	12.6649	5.86431	3.57268	5.31672	5.75276	5.92367	3.90125	1.42645	1.56092	1.72039	2.33901	3.08534	2.17145
Pita_unigene45935	0.915822	0.414915	1.06292	0.723259	0.704867	0.769265	0.860736	0.858692	0.164149	1.1781	0.434804	0.86126	0.717916	0.732765	0.199327	0.41281	0.496609	0.574394	0.947561	0.742726	0.206148	0.483576	0.589275	0.74211	0.381543	0.467912	0	0.239411	0.106012	1.00527	0.432847	0.299092	0.100759	0.415635	0.275439	0.985157	0.140196	0.428253	0.0674724	0.202575	0.191751	0.80343	0.193499	0.126548	0.102483	0.155566	0.147061	0.540832
Pita_unigene45929	5.73151	29.0262	44.0868	55.9656	24.7726	25.0515	22.3808	21.8045	33.2612	24.6255	22.7843	14.2932	56.7753	41.1417	34.663	25.4623	38.5659	68.3391	36.8796	12.3008	20.9426	14.696	48.5068	19.1901	24.183	24.9926	20.1953	4.17915	24.1522	3.11862	24.9547	24.7594	28.9318	4.82258	11.3765	8.40811	22.4173	11.9669	32.0131	7.2275	2.03973	9.13908	55.7993	29.6274	27.257	80.0716	70.6106	12.8206
Pita_unigene45873	15.2802	29.0993	23.3097	20.8645	16.6389	13.3962	10.8857	15.1112	22.5141	18.4122	10.5312	15.8169	14.7083	9.08577	19.5478	15.7745	14.3069	10.8871	22.2022	12.5582	15.2252	13.5452	8.80879	11.2295	10.3595	8.26078	15.0531	4.17312	10.4171	7.73614	6.52984	4.47481	9.08266	1.38399	5.14773	4.80315	7.42698	6.91613	12.4848	4.32266	5.30216	9.01009	19.3283	8.18535	12.4484	14.9454	15.4635	13.8574
Pita_unigene4587	11.8751	14.0326	45.6456	53.7595	33.5548	10.6488	34.0076	7.40899	11.3406	30.6966	9.75091	8.1008	38.2471	22.3858	13.6746	19.2845	33.7551	68.3482	9.23097	4.69456	6.70245	4.84433	36.2251	4.40186	14.7959	13.7052	5.07004	3.74844	33.3843	3.33641	5.48696	9.72318	5.54918	2.81413	1.02005	0.984082	6.1647	17.8137	6.15889	0.846827	0.534742	3.62874	17.5067	43.1687	24.7309	33.8504	30.1183	8.05856
Pita_unigene45863	27.1394	26.1302	9.94765	12.847	13.483	10.2318	14.9222	28.4524	31.0965	26.78	22.6824	10.8966	25.7536	12.9692	16.0712	15.7938	10.4627	16.3716	30.1999	60.194	26.3434	34.5082	16.7711	22.7353	27.2847	27.7364	17.2662	46.7802	24.0671	40.967	50.3627	38.7479	32.0255	101.451	53.9976	48.6358	192.26	71.4278	53.5962	207.415	164.462	75.5952	38.7304	39.7276	29.6035	47.1092	40.2563	36.3727
Pita_unigene45855	12.1834	2.54912	0.820301	6.89803	2.62456	2.47142	8.44457	2.6413	3.51563	13.7954	3.4306	3.17846	12.7561	2.45891	3.797	4.17452	4.99005	11.395	14.1814	3.42749	3.67842	4.4569	10.1361	4.04053	7.90838	6.91067	6.56291	9.25741	9.10148	8.39042	17.3634	11.2463	12.8917	14.8006	23.2205	13.3384	12.4395	11.9223	16.3307	18.4429	23.2658	12.5571	10.3198	7.23017	9.1684	9.20028	11.9913	8.49061
Pita_unigene45798	0.239856	0.182787	0.317212	0.221952	0.209935	0.406452	0.0866893	0.170605	0.217409	0.283542	0.0294763	0.700572	0.113496	0.0517966	0.411222	0.12056	0.398834	0.0772138	0.0851191	0	0.0522308	0.0558159	0.11695	0.25706	0.0475094	0.161473	0	0	0.14342	0.0286552	0.338962	0.0945689	0.437864	0	0.143374	0	0.0525982	0.203219	0.454034	0.189892	0.0392108	0.118089	0.219955	0.148325	0	0.0272514	0.214883	0.114056
Pita_unigene45784	3.28893	2.5727	4.37593	3.16915	5.10827	21.3441	2.71402	4.19063	2.66003	2.89285	11.0488	4.1945	2.51264	4.6337	5.00588	5.5565	2.99354	2.68423	2.28761	5.19481	3.11212	5.78134	4.70728	6.54112	23.1601	14.8811	12.6384	15.1928	15.115	33.068	46.5476	19.0758	26.0599	47.5575	71.4032	37.5781	13.7974	13.3127	24.7381	42.8459	28.9039	13.8336	5.17208	5.37014	9.63553	9.46685	34.0006	6.44145
Pita_unigene45775	7.88819	3.53068	2.36245	3.74418	3.14487	1.32116	7.25406	2.54502	1.95484	2.85545	2.18288	1.39228	1.97652	1.37852	2.68788	2.77206	0.970175	8.21391	1.62044	1.4247	1.25051	0.924418	5.83356	0.478839	2.09963	1.94545	2.9239	0.557362	1.38695	1.95122	2.02369	1.27648	1.93361	0.409597	0.938719	0.507495	2.29377	2.03472	3.01906	0.693226	1.87017	1.18848	2.16565	1.3298	2.11545	0.72967	1.34715	0.909119
Pita_unigene45770	0.635877	0.949302	2.12804	0.618823	1.59626	0.616059	0.860778	1.29746	1.15984	0.619157	0.643754	0.479196	0.513922	1.48911	1.63686	1.72361	0.649113	1.67059	0.329862	1.05798	0.701495	0.571308	0.69405	0.396063	0.693741	0.64416	0.432103	0.122957	0.248218	0.346086	0.250494	0.351673	0.587083	0.0683512	0.118667	0.169704	1.05776	0.839215	0.817669	0.24278	0.250492	0.701683	0.53167	0.660948	0.77119	0.495895	0.442998	0.571086
Pita_unigene45765	0.715104	0.752434	1.27876	1.09862	2.09696	0.9659	1.38775	1.65776	1.754	1.92769	1.40462	1.58438	1.48338	0.823999	2.51825	1.9102	1.23655	1.93287	0.944083	0.649007	0.778464	1.00856	1.0848	0.765033	1.14355	1.0921	0.724463	0.99958	0.882868	0.460166	1.31017	2.0346	1.46232	0.642944	1.18636	0.750552	0.631165	0.642719	0.44442	0.530591	0.467075	0.628139	0.640094	0.667057	0.525881	0.5361	0.881167	0.571228
Pita_unigene45735	6.06428	7.75764	5.07556	3.05217	2.41547	2.20647	5.93019	2.65721	4.04268	2.1225	1.68948	3.01611	1.57259	5.20977	8.70329	2.10232	1.59253	9.09707	0.535956	1.96682	6.92927	1.21227	4.40009	0.974985	2.45832	2.4613	0.549192	0.69841	3.17483	1.55961	2.23755	1.61477	0.136193	0.432076	1.30288	0.484962	1.56903	2.73164	0.280697	0.298146	0.70304	1.06471	1.50044	1.7281	0.483517	0.0542914	1.65553	0.9757
Pita_unigene45710	17.4975	11.0705	11.5998	8.54005	14.3592	21.7381	12.808	19.9716	12.637	11.3989	13.4718	8.38568	11.9861	28.1102	13.985	15.3675	7.72328	18.8277	10.2727	29.3502	9.43293	15.2694	11.6429	7.39747	48.2736	19.8367	14.6269	123.84	32.0913	26.8816	87.3563	62.5608	22.1722	207.103	178.188	69.0207	32.4996	23.0294	28.3494	41.6371	49.0442	23.6735	10.0446	7.42624	9.33655	10.7677	11.8287	13.5153
Pita_unigene45695	0	0	2.15337	0	0	0	0	1.43588	0	0.184656	0	0	0	1.51168	0	0	0	0	0	0.826339	0	0	0	0	0.691521	0	1.25604	0.542139	4.11776	2.04727	1.2179	0	0.594362	0.731266	2.2096	1.36377	2.08495	0	2.87034	0.510891	3.65137	3.68094	0.186673	0	1.80979	0.299404	5.78989	1.56209
Pita_unigene45678	2.52472e-05	0.00108373	0	0.00179223	0	0.116745	0.117868	0	0.00122014	0.16221	4.72476e-09	1.103e-08	0.100785	0.229217	0	0.0277049	0.276454	0.322043	0.159005	0.208109	0.173999	0.256034	0.149078	0.0380013	0	0.114905	0	0.341025	0.163159	0.233343	0.274386	0.176588	0.0646614	0.239591	0.19464	0.12873	0	0.300561	0.106847	0.0479409	0.375527	0	0.0894852	0.135788	0.2458	0	0.0469623	0.189123
Pita_unigene4566	12.4226	14.966	12.9941	12.451	16.0061	9.04427	11.9493	6.07294	13.9919	6.30027	4.26904	3.91068	11.1235	10.7458	16.718	7.96474	7.25557	16.2231	5.83887	10.3524	18.2108	8.76733	11.5734	3.13132	12.4608	14.4337	8.26999	4.90597	13.8081	6.60827	6.14386	9.40241	5.63421	2.51312	6.95624	3.02657	5.5056	6.86545	2.59771	2.39875	3.85252	4.93904	8.90754	10.0608	4.66031	6.38916	11.5914	7.15493
Pita_unigene45617	1.18598	0.491264	0.39659	0.574755	0.932795	0.288231	0.408019	0.748755	0.50672	0.700065	0.742089	0.566417	0.586157	0.453407	0.665059	0.652904	0.312498	0.738392	1.15802	0.859859	0.760073	0.773757	0.914162	0.79124	1.12752	1.02278	0.723559	1.73246	1.04891	0.418295	2.38214	3.00084	1.42305	2.41412	2.62107	1.83902	0.896262	1.04918	0.854866	0.907554	0.785678	0.685646	0.516275	1.05945	1.09396	0.757569	1.1612	0.748214
Pita_unigene45577	1.46181	0.736512	2.40789	2.13139	4.48851	1.15493	1.33736	0.956207	1.29976	1.61239	1.30028	0.557917	1.19209	0.68152	2.49984	1.8528	0.733191	2.02318	0.402581	0.660829	0.792702	0.748278	1.06102	0.433588	1.46099	0.609606	0.488283	0.15989	0.434776	0.571671	0.707542	0.596142	0.646082	0.278021	0.236336	0.398379	1.86943	1.25835	1.02125	0.521274	0.322614	1.4145	0.815362	0.638115	0.722093	0.258542	0.548993	0.825308
Pita_unigene45569	0.187996	0.0693426	0.128185	0	0.396433	1.14013	0.131308	0.174937	0.0618548	0.132002	0.10363	0	0.0662261	0.0604267	0.0624684	0.480603	0.0580468	0	0	0.369091	0.129489	0.0634695	0.132848	0.0606121	0.540054	0.147944	0.434035	0.904116	0.303851	2.40552	0.674555	0.574754	0.0760147	2.50005	1.06915	1.89576	0.634851	0.529224	2.2515	0.893242	0.874757	0.610819	0	0.271365	0.206674	0.061556	1.72128	0
Pita_unigene45566	3.65091	1.45359	1.38883	0.206698	0.631529	0.946466	1.29004	1.40493	1.05228	1.11374	0.658646	0.677112	0.583601	1.48835	0.882595	0.778249	1.10706	1.99628	0.615515	1.74807	0.555236	0.979523	0.759617	0.462011	2.51796	2.53605	2.65805	4.33873	2.34644	3.17379	4.26757	2.8525	1.98307	4.1265	2.7102	1.77598	0.911514	1.09815	1.09044	1.13261	0.983179	0.338831	1.73046	0.594147	1.05004	1.11512	0.930216	0.554791
Pita_unigene45538	0.291854	0.259017	1.10072	1.10177	1.06743	2.11906	0.542416	0	0.347031	0.911202	1.11102	1.85375	0.465522	0.115663	0.444843	0.202499	1.69007	0.509652	0.346003	0	0.120973	0.160474	0.503142	1.38529	0.581242	0.129549	0.297714	0.147323	0.074488	0.448524	0.211851	0.146531	0.172331	0	0.0941333	0.570266	0.0826104	0.122918	0.231543	0.0184938	0.0368717	0.424689	0.186672	0.067176	0.317422	0.155703	0.436604	1.00017
Pita_unigene45530	58.1355	130.244	64.1705	42.9281	60.7082	66.1668	209.931	317.668	1016.84	200.661	514.16	160.122	141.061	428.141	736.559	385.72	154.502	214.302	124.844	206	673.281	282.613	198.791	156.885	375.725	86.2436	196.395	520.612	338.955	103.204	1315.26	496.332	1941.14	2053.3	1972.71	1100.1	712.406	486.294	828.339	970.192	1112.56	360.481	364.233	248.389	803.069	319.855	651.073	237.221
Pita_unigene45527	0.180119	0.055272	0.281859	0.162241	0.267104	0.187744	0.0469092	0.0797549	0.0986132	0.0621268	0.053444	0.0944107	0.128921	0.0800343	0.484143	0.226136	0.0780727	0.173672	0.0857885	0	0.0361445	0.0337646	0.173265	0.0321899	0.123011	0.1484	0.0681033	0.0919763	0.10007	0.138514	0.0984826	0.144974	0.0654584	0.0177698	0.035541	0.0679322	0.0351576	0.188862	0.0641762	0	0	0.0357621	0.169322	0.143316	0.127668	0.0660805	0.260087	0.120842
Pita_unigene45519	9.73134	7.90609	10.9784	4.46595	9.41976	6.93978	9.0114	8.24796	7.52347	3.57102	6.88308	8.30193	4.45737	4.75949	9.6242	7.90626	4.36298	9.23302	4.36338	6.36714	6.01201	5.96246	5.29899	6.68062	3.33041	2.75613	3.43189	0.865155	0.599576	1.88015	0.134639	1.27426	1.33487	0.288034	0.157143	0.709301	0.17323	1.1152	1.36055	0.291462	0.404273	2.13484	2.10059	4.84933	4.41514	5.89982	2.28044	7.63467
Pita_unigene455	6.58307	4.27991	4.40976	3.07844	2.61792	3.29339	2.52799	4.62879	3.82089	3.06329	2.78846	2.06381	4.01706	3.62669	3.04234	2.92553	3.01525	5.30803	3.77758	4.55501	2.65511	1.52761	3.81363	1.42419	1.22314	3.24082	3.78229	0.774781	1.92616	2.92524	0.597891	1.17695	1.67433	0.597634	1.57155	1.30255	2.34837	3.22789	7.444	0.916291	2.45604	3.77021	2.61931	3.47268	3.75746	2.43773	2.48163	2.48179
Pita_unigene45485	0.72956	0.578429	0.938198	1.79353	0.861624	1.55682	0.818682	1.13005	0.745129	1.81347	1.03589	1.71966	2.16164	0.710723	0.715007	1.01689	1.17231	0.999721	1.90891	1.10935	0.634258	0.376017	0.604224	1.26259	0.654692	0.530115	0.582671	0.104794	0.913224	0.698703	0.553424	0.530107	0.356574	0.327625	0.603808	0.32946	1.44861	0.793268	0.336073	0.505642	0.560943	0.37508	0.834233	0.340321	0.291545	0.51181	0.545897	0.225608
Pita_unigene45457	0.178193	0.634152	0.476812	0.475088	0.822804	0.275619	0.120331	0.100995	0.115319	0.0241067	0.0490729	0.0519932	0	0.0373958	0.572137	0.125466	0	0.1672	0.0401228	0	0	0.0464799	0.165662	0	0.282263	0.134339	0.0398273	0.0506275	0.111107	0.119253	0.323535	0.131215	0	0	0.041575	0	0	0.0866671	0.0770402	0	0	0.0419167	0.124176	0.105699	0.251227	0	0.281243	0.0404421
Pita_unigene45453	0.0966953	0	0.0515428	0.0427906	0.16232	0.468242	0.291188	0.174981	0.183271	0.210503	0.11934	0.0951586	0.0784636	0.0413718	0.148207	0.162643	0	0.125178	0	0.161948	0	0.145785	0.104422	0.0718098	1.59316	1.12427	0.714233	7.6294	0.858915	0.129792	6.99115	4.86433	1.76044	22.9446	9.45489	3.16692	0.960161	0.467874	0.331334	2.99712	0.867099	0.0603848	0.0394964	0.189273	0	0	0.248276	0
Pita_unigene45350	0.176689	0.465882	0.882019	1.49616	1.59522	0.374473	0.206222	0.699149	0.304379	1.47569	0.518328	0.34746	1.51518	0.810958	0.772932	0.935927	0.53443	0.522201	1.06959	0.451285	0.294749	0.841273	0.487054	0.279164	0.354122	0.182707	0.207153	0.444418	0.369092	0.0473281	0.434494	0.536489	0.242635	0.577317	0.130999	0.139623	0.442325	0.107376	0.417026	0.389501	0.149176	0.0434256	0.210437	0.399323	0.35547	0.501389	0.49203	0.174458
Pita_unigene45349	42.967	43.74	73.6618	66.0668	112.426	33.6081	60.771	102.355	39.0311	52.0505	66.2201	39.3931	66.4362	97.8799	44.7138	100.395	27.0571	58.1028	43.9717	51.1465	48.6647	73.632	26.5746	19.9469	63.5288	71.6388	64.0538	22.4325	16.8805	26.9534	19.8756	55.9518	41.6104	9.07284	12.9451	20.9609	19.264	39.751	23.7908	10.5878	13.8342	11.0395	38.4455	29.9359	21.6734	32.0614	6.73092	28.9074
Pita_unigene45339	45.5295	57.8781	23.5943	76.5584	35.4988	14.2542	97.5213	25.076	63.4964	69.8693	39.4173	16.8182	96.5554	24.0091	74.8994	50.4171	27.3745	93.5153	90.9757	18.0849	91.6239	41.3563	95.9484	21.9597	19.0857	32.6265	25.6998	8.73477	17.9333	50.1967	10.6247	30.8559	19.2455	3.95787	10.7387	46.6427	14.0602	39.283	25.7693	7.46725	9.68331	59.0205	24.6136	37.9839	36.4958	20.0311	25.2625	65.3944
Pita_unigene4533	0.843785	0.448054	0.879634	0.583715	1.22234	0.994698	2.8122	2.84327	1.34891	2.29117	2.49621	5.56748	3.85072	3.8526	3.48293	6.98526	4.98567	2.15216	2.08684	4.25604	2.19656	5.99953	4.18737	2.59423	7.85178	2.68275	3.4663	33.9063	8.68664	3.48357	26.0787	16.3564	14.3481	52.2406	33.308	15.0886	38.903	12.4333	14.2856	47.8076	35.7145	11.9022	4.52318	1.58646	6.11488	2.99088	5.12819	2.7196
Pita_unigene45319	3.99002	1.44368	4.11907	2.66839	2.11827	1.5059	3.46204	2.30277	1.56051	2.54276	1.55855	2.43975	1.70103	1.46548	2.69638	0.882498	1.41583	3.51577	2.5435	1.99255	1.30762	0.916693	2.36544	1.61357	1.24275	2.52491	4.71803	0.249552	1.15758	0.50823	0.20461	0.465956	1.99615	0.239187	0.220983	0.147641	0.327807	1.66745	3.03783	0.511391	0.453967	0.651934	0.780285	1.58304	4.40413	0.717526	1.20002	0.91199
Pita_unigene45315	0	0.0407274	1.80443e-06	0	1.38291e-06	0	0	0.0202693	1.46745e-06	0	1.59895e-06	1.01879e-06	7.1248e-07	0	0	4.79459e-06	6.01106e-07	3.75672e-06	1.43124e-06	2.11689e-06	0	0.119281	0	0	0.0737122	0.193439	0	0.485137	0.164539	0.222709	0.749846	0.696087	0.192381	1.46056	0.523255	0.114577	0.0625981	0.0907062	0.437792	0.563008	0.187885	0.0343952	7.58307e-07	1.16454e-05	0	0	0.113805	0
Pita_unigene45309	0.283715	0.108156	1.22997	0.278409	1.16615	0.298187	0.421675	0.332233	0.351411	0.167802	0.10437	0.0792791	0.0689961	0.895286	0.975873	0.843164	0.332344	0.748147	0	0.181726	0	0.100098	0.410429	0	0.412814	0.258516	0.205377	0.296993	0	0.139391	0.351103	0.97828	0	0	0	0	0.453513	0.671418	0	0	0	0.188046	0.696489	0.797396	0.253903	0.183027	0.218478	0.628551
Pita_unigene45276	83.159	58.8121	59.9667	48.3242	24.4924	44.0972	94.3375	68.4034	75.0409	69.9449	58.4474	82.6158	54.8917	51.913	43.0553	50.4449	57.7608	70.5954	52.8026	41.8147	42.4258	43.1096	74.2422	65.3745	23.9005	57.1441	54.5174	20.096	26.1597	96.7569	20.0984	29.1771	37.1031	12.5436	17.3046	36.4482	26.9004	46.5437	50.9719	20.8814	22.431	49.1777	42.0802	50.5426	67.0607	47.3492	38.0587	46.2886
Pita_unigene45269	5.66632	5.15361	6.78619	2.26223	3.41903	6.43225	1.927	4.30719	1.6955	1.01528	1.24899	2.293	1.16376	6.7739	4.84213	2.31591	3.46405	2.95638	0.778859	4.13483	2.97459	2.13256	3.24888	3.44054	9.55728	3.54171	4.98944	17.425	13.2848	8.91725	10.1555	6.62806	5.49262	10.2335	12.1892	12.562	3.45124	2.36578	3.07386	5.77467	4.96732	6.99744	2.37768	1.04264	2.26197	3.08963	3.31342	3.46543
Pita_unigene4524	0.133893	0.177741	0.5058	1.33769	1.65681	1.56793	0.141927	0.147939	0.196784	1.13861	0.859087	1.06377	1.16186	0.0891801	0.453488	1.04775	1.42376	0.183513	0.963698	0.20486	0.229165	0.767478	0.240537	1.47814	1.35626	2.09307	1.67626	1.41219	0.942255	1.25777	1.46868	1.79218	1.09212	1.58196	1.36121	1.89722	2.6873	2.16327	1.77836	1.48657	1.66854	2.0769	1.80145	1.87564	1.02105	1.03925	1.35314	1.42407
Pita_unigene45237	44.535	160.724	584.302	970.773	319.194	356.874	423.895	135.042	128.902	535.018	55.5044	159.766	611.488	404.34	149.228	174.311	423.968	667.073	148.68	104.421	75.0102	23.2352	408.539	105.773	184.538	161.266	20.699	52.281	133.702	115.298	86.8096	119.516	17.4623	29.8084	6.88896	25.51	121.165	143.326	20.5089	10.1299	7.19085	117.837	218.338	234.126	68.6036	184.533	116.859	190.361
Pita_unigene45229	1.72081	2.61903	3.11129	2.17989	4.0461	1.0833	2.31035	0.303077	1.82759	1.71955	2.49252	0.523795	1.37918	0.344708	3.47924	3.48574	0.655887	4.32003	1.41697	0.327033	0.414201	1.05043	4.9381	0.886169	1.79067	1.60736	1.39161	0.121624	2.46656	0.974675	1.17953	1.04066	1.15498	0.0886758	0.180352	0.724471	0.439598	0.72009	1.01034	0.152696	0.332922	0.910629	1.28628	2.52353	2.80112	0.586611	3.10176	1.64758
Pita_unigene4519	6.97597	9.12655	4.54984	5.87568	4.77048	3.99789	3.94329	5.40495	7.77522	5.04294	5.33207	5.47818	5.11059	5.19696	8.17686	4.33654	4.63156	3.44948	4.81271	4.48671	4.55332	3.61874	2.62652	3.7964	10.1327	13.3343	9.90854	11.4473	9.73449	20.7965	12.5733	19.1593	15.8224	19.9332	22.2222	14.5753	11.176	14.304	13.7041	18.8901	17.8022	8.69492	4.48157	6.18315	6.41792	8.3731	5.60201	2.45182
Pita_unigene45189	0.960954	1.60964	1.7677	0.770275	0.81691	0.386497	0.371154	2.55492	1.20303	0.20685	0.294858	0.178337	0.207688	1.43839	0.627606	0.215258	0.366455	0.326811	0.202604	1.32918	0.650056	0.23905	0.625877	0.608244	1.93625	2.12586	2.04978	1.56085	1.71526	1.47456	1.23563	2.97229	2.52126	1.25626	1.8035	1.52826	0.956508	1.38697	1.45323	1.19298	1.41726	1.30477	0.50182	0.806149	1.12168	0.892754	1.09511	0.650727
Pita_unigene4517	0.317137	0.522279	1.00171	0.443055	0.942404	0.706267	0.46969	0.232565	0.563999	0.208904	0.518163	0.380322	0.327975	0.57301	1.46379	1.46806	0.711362	0.998316	0.307178	0.675152	0.552087	0.541601	0.277229	0.348176	0.260006	0.290613	0.330246	0.63146	0.108351	0.116206	0.0269999	0.156352	0.164847	0.318267	0.0397734	0	0.513041	0.610556	0.47312	1.08333	0.345296	0.387062	0.660276	0.814747	0.435236	0.616767	0.346561	0.180371
Pita_unigene45134	0.297713	1.15684	0.930927	0.277843	2.71507	0.439436	0.703421	0.560986	0.714442	0.338329	3.52999	0.303998	0.28318	0.851008	1.60548	3.19873	0.4262	1.0607	0.248634	0.262726	0.664934	2.20108	0.427036	0.362827	0.627129	1.79211	0.274083	0.0591843	0.129932	0.111597	0.116363	1.25839	0.12957	0	0.0858142	0.0821343	0.312093	2.06061	0.150145	0.0762496	0.0552109	0.0574959	0.399101	1.58847	0.235096	0.212306	0.478255	0.0555308
Pita_unigene45079	0.335979	0.149047	0.166857	0.286403	0.371026	0.143866	0.136083	0.0572773	0.176644	0.179854	0.0313031	0.109242	0.297191	0.0982041	0.131183	0.0791648	0.0333726	0.356124	0.437803	0.200031	0.10205	0.146359	0.228674	0.096792	1.28297	0.197964	0.161329	2.26596	0.4447	0.130527	1.15197	0.595309	0.427292	1.02286	1.51046	0.901112	0.289086	0.360374	0	0.536826	0.525645	0.0849771	0.131891	0.371479	0.19407	0.0334722	0.210114	0.342517
Pita_unigene45073	9.0868	11.1609	4.28496	6.22991	4.20098	6.02091	11.6008	9.12431	12.7616	8.75183	5.16045	7.07515	8.01941	5.20433	8.23189	6.56554	4.81981	9.73178	10.038	7.63155	9.52824	5.97193	8.57319	5.66368	13.6992	12.2535	19.525	32.3498	11.3578	11.154	30.1412	44.9365	39.1938	66.7749	43.4516	23.4227	8.43453	16.1154	15.2195	13.0477	9.56687	8.79994	6.56193	11.0653	13.4213	9.89972	7.95776	7.60495
Pita_unigene45012	1.59611	0.885775	2.16835	1.24094	1.52478	0.732301	1.09802	1.52942	2.43503	2.98848	1.32839	1.7415	1.94988	0.895191	2.90376	2.4138	1.48621	1.46553	2.07065	1.13716	0.472813	0.911048	2.67336	1.32651	0.704053	0.917989	0.985611	0.577578	0.744244	0.492644	1.29563	1.30882	0.473248	0.313842	0.191796	0.549864	1.5569	2.42957	3.86165	0.665983	0.5551	1.68433	1.63276	3.65588	3.09573	2.8692	4.68463	1.13489
Pita_unigene44994	2.79648	2.7399	3.24173	1.09639	1.7944	1.11041	2.33309	2.15496	2.37468	1.82481	1.92522	1.53601	1.02833	1.40426	1.90826	2.0617	1.03079	2.0955	0.80694	1.42791	1.13746	1.22299	2.1808	1.26845	1.14658	2.85161	2.6184	0.23373	0.430804	3.64447	1.5167	1.28398	1.09898	0.18062	0.248439	1.70631	3.06948	1.78696	2.44194	2.60738	0.958865	3.61147	3.60058	3.08959	3.01471	2.48309	2.38426	3.33375
Pita_unigene44993	13.5077	13.6646	14.8466	11.4892	13.8779	12.9153	11.5696	7.22769	14.0554	14.7615	13.428	13.6922	12.9621	6.07923	9.19136	8.96979	9.24655	9.04181	13.4145	8.44021	9.71578	9.67471	10.7438	11.2098	9.24614	16.0786	16.6718	2.54937	5.52438	13.3638	3.08078	7.3319	8.27782	1.95925	4.19624	6.16932	4.11197	8.55732	8.90112	2.3004	3.50366	6.31542	10.3219	11.8528	13.193	8.76548	10.0227	12.4357
Pita_unigene44987	3.65164	2.56893	1.75988	0.931207	2.40608	0.9614	1.03428	2.44079	1.51041	2.23747	3.18041	1.25656	1.04033	0.930014	1.98449	1.86724	0.395753	1.04552	0.543722	1.6262	0.818066	1.65844	1.49502	0.697064	8.77083	2.18298	1.16899	4.64371	4.89277	3.32891	36.0132	10.0048	9.27827	12.6503	22.6377	19.0719	14.265	4.45539	5.02431	6.60306	10.7935	7.74309	1.45864	1.28695	1.11747	0.977026	4.53284	2.24274
Pita_unigene44972	14.3528	11.5504	13.1126	15.4926	14.3746	17.8472	12.0308	24.5627	16.5153	17.8615	30.7842	16.0807	18.055	22.9383	18.0838	15.8704	17.0847	17.6153	15.3576	27.3232	13.4477	13.6433	13.0764	15.5165	35.7315	22.9666	13.1514	94.8311	31.1587	34.5447	61.9122	45.6786	37.5611	110.45	67.7004	81.7114	48.9292	32.6595	30.2221	95.2567	59.7195	36.164	20.933	21.7204	16.6097	27.4569	28.4563	21.9878
Pita_unigene44909	0.567533	0	0.438138	0	0.0806294	0.273485	0.454759	0.528342	0.126549	0.0837386	1.12317	0.76367	0	0.0999986	0.0926285	0.635398	0.640339	0.200873	0	0.104987	0	0.127861	0	0.463991	4.31264	0.0862183	0.0744908	1.70156	0.249927	1.44341	9.43214	0.648916	0	3.26975	2.21114	2.29418	11.1845	1.17617	0.807839	4.20838	2.78425	0.804986	3.56922	0.0790324	0.170042	0.142909	1.36772	0.106937
Pita_unigene44870	28.6477	55.2189	108.911	42.2848	71.4686	85.6982	30.7676	128.674	73.0823	56.6852	120.18	43.0998	61.4565	195.551	61.5152	90.4222	77.0269	40.0457	47.3265	121.369	65.8626	95.0081	38.7773	56.2604	138.306	144.074	64.5158	209.478	153.224	115.535	197.858	295.013	99.5655	264.411	301.057	283.686	54.3854	180.913	65.6854	68.9223	114.621	88.7007	46.2996	139.546	49.3493	87.2614	118.533	100.298
Pita_unigene44855	0.745925	1.71895	1.84359	1.13587	2.21123	1.00968	0.617145	0.994225	0.849597	0.618075	1.2132	0.880843	0.731762	0.565243	1.9911	1.37869	0.530924	0.831462	0.346132	0.296981	0.520747	0.127698	0.289918	0.263819	0.904696	0.418129	0.364908	0.370956	0.468026	0.545943	0.159567	0.216274	0.329565	0.0447914	0.156823	0.128545	0.511162	0.555575	0.399788	0.0398059	0.0432331	0.337964	0.736627	0.451994	0.552066	0.520222	0.842991	0.21756
Pita_unigene44819	0.146199	1.09121	1.74846	1.36593	6.45578	0.573878	0.550941	0.869014	0.713805	0.277005	1.62268	0.29821	0.555819	1.26812	7.99457	2.01698	0.669329	0.680093	0	0.647326	1.01881	0.665806	0.0696751	0.0635918	0.647515	1.16472	0.201563	0.0723496	0.892578	0.617807	0	0.603054	0	0	0.350492	0	0	0.910751	0.0736273	0	0.0677361	0.42076	0.559697	1.01166	0.0722929	0.193605	0.219391	0.47482
Pita_unigene44818	0.813177	0.202344	0.24935	0.63305	0.537147	0.598699	2.87395	0.201422	0.421154	0.706127	1.04627	0.207362	0.193246	0.411383	0.364592	0.200337	0.16946	1.3252	0.125667	0.0666463	0.0629764	0.246951	2.13229	0.176864	1.27573	3.16485	2.86567	0.671036	1.06396	0.572563	0.593159	1.04815	2.29165	0.907188	1.62496	0.375154	1.28825	1.76582	2.04794	4.45139	2.0095	0.975899	1.29718	1.12153	0.670001	1.43751	1.69555	0.314595
Pita_unigene44811	3.39681	0.290862	0.100293	1.00422	0.205846	0.145112	0.308935	0.0306117	0.0274341	0.421237	0.0297566	0.0625733	0.376554	0.0267384	0.0277412	0	0	0.259321	0.0951148	0.291645	0.0861733	0.0281727	0.0320292	0	0.964402	2.24906	1.93243	0.568479	0.781264	0	0.446556	0.956712	0.95581	0.168137	0.0989117	0.0629666	0.983924	0.382628	1.19029	0.196407	0.0286212	0.361764	0.755495	1.03316	0.64162	0.196658	0.49481	0.0287839
Pita_unigene44780	3.97167	5.24078	8.74748	5.13065	5.40532	4.38677	5.62832	5.9421	5.85157	7.39082	8.06138	6.36694	6.32889	7.96825	6.01021	5.59748	8.0174	7.11442	2.45673	2.73397	3.43608	2.03466	4.79555	3.03254	3.32127	2.57721	2.69369	1.31526	2.09809	3.39626	3.06192	2.33467	2.1235	1.1701	1.57292	3.26938	3.45179	3.51753	2.56484	1.42753	1.32438	3.46242	5.49307	4.63247	4.67798	4.77717	8.46137	3.73434
Pita_unigene44763	1.14477	0.839348	1.01973	0.856677	1.56976	0.991837	1.13099	1.09971	1.18203	0.981598	2.68319	1.42584	0.515998	0.765625	1.08722	1.99151	1.87062	1.73952	0.0871007	0.486475	0.405892	1.08277	1.37338	0.778384	0.758974	0.514614	0.165466	0.526917	0.955282	0.107649	1.49145	0.794213	0.750687	0.80496	0.286063	0.30742	0.360993	0.61777	0.20976	0.245667	0.194329	0.211309	0.554165	0.272902	0.213851	0.679891	0.939562	0.381737
Pita_unigene44761	2.38771	1.05178	6.67296	2.14355	3.52759	0.857617	0.780209	2.13943	5.71101	1.43518	1.63848	1.92148	1.17893	2.94478	6.88529	6.78847	1.61699	0.987321	0.553732	2.52455	0.85413	3.09898	11.1831	1.51853	1.32295	0.923332	1.56315	1.77715	5.88999	1.42108	3.76139	2.17775	1.20038	2.24451	2.38065	1.60687	9.35419	5.20676	16.1089	6.50533	7.95984	6.45766	2.98925	1.42758	5.30669	2.69172	7.9649	0.512914
Pita_unigene44758	17.6857	17.5891	12.9149	8.32594	5.99123	4.34235	19.1951	2.49644	14.3721	8.68239	8.36325	1.98825	7.12454	1.49066	5.62347	7.53915	3.63402	15.7569	3.38302	2.06974	6.44856	3.10729	5.21371	0.292238	3.13231	4.13806	21.7095	0	1.60332	3.19135	0.531572	0	4.03109	0	0.39215	0.0938863	0.447231	0.347337	5.04327	0	0	0	8.74283	2.54212	3.78038	0.381584	1.195	0.882323
Pita_unigene44750	14.5519	15.6757	9.80798	8.55855	14.1648	13.3356	14.02	16.4189	12.6409	10.2948	13.2844	16.5785	7.72927	10.596	10.5753	11.9973	8.16301	11.6685	10.8353	44.0984	14.2906	16.6522	8.36687	8.82886	21.2919	18.0041	20.0373	130.979	31.8807	17.4735	20.3561	35.8418	15.134	104.626	45.215	18.2038	67.3047	30.3933	21.5153	76.4853	95.0085	43.0088	6.3566	8.41654	14.2874	4.26198	11.6702	7.84595
Pita_unigene44719	5.16812	9.88412	3.62072	17.0918	28.0967	9.61045	6.76177	1.15334	8.1532	8.59123	13.1383	5.89952	7.81245	3.87938	10.2334	13.8967	9.42266	8.54073	5.32301	2.9272	9.87256	14.3863	7.26711	8.1306	17.5755	14.9506	18.1533	41.1619	22.4928	16.3097	11.2064	21.7321	16.4516	34.3374	23.9818	18.8422	11.2124	16.7616	13.4018	16.5427	16.3312	14.1249	7.15889	8.37182	14.2166	10.4052	12.9312	9.50425
Pita_unigene44649	16.2606	19.8084	14.584	18.9	14.4835	21.3332	28.5335	11.4934	13.1247	16.1112	15.4873	21.3239	20.9517	11.9898	22.9433	14.5988	21.8531	27.9468	13.9981	6.22994	22.1006	16.7005	22.6851	15.1576	10.0858	14.4154	18.5054	5.75548	13.2736	6.53734	6.69968	9.8723	14.2508	4.14152	7.66889	3.7318	4.73158	10.8377	12.3675	3.12997	5.71395	6.48401	7.65127	12.6818	19.3169	6.93855	13.7587	6.61432
Pita_unigene44635	28.5283	34.1507	35.4343	3.26293	19.0462	5.04081	15.4007	33.6934	27.8094	2.46342	18.7531	3.70344	2.52837	29.0082	33.7667	18.8643	3.14262	10.737	2.31046	19.8221	20.0459	15.2964	17.2394	2.2298	70.7962	38.1395	25.9164	41.5833	87.9867	138.679	43.1949	19.4561	17.1643	34.6746	65.6815	35.1499	41.0366	16.032	33.1285	36.4766	51.7865	39.1378	15.8246	7.0324	15.1345	20.6167	35.3336	12.6179
Pita_unigene44625	2.85179	3.54412	0.984198	2.71731	1.07433	3.25731	1.22766	1.76412	7.26961	7.5489	9.18861	7.02034	8.01479	4.64548	15.4085	9.25057	13.2932	3.29083	4.07293	7.04093	7.71615	17.1753	2.70982	12.2951	17.8765	5.5892	5.12474	40.0554	16.1617	11.1802	80.4151	19.9806	14.6988	111.683	32.5253	54.9684	38.6058	19.8861	15.3014	71.9214	32.133	21.294	14.778	5.57844	9.88919	15.0668	9.83426	8.33918
Pita_unigene44564	1.21506	1.28794	1.09426	0.984767	0.853735	0.749376	1.09548	1.10772	0.928834	0.504454	0.279585	1.0668	0.807202	0.941625	1.48976	1.03055	0.897498	1.17311	0.876256	0.771067	1.17868	0.333816	2.05426	0.972543	1.64474	1.14544	1.59896	3.55514	1.41618	1.51346	4.17255	2.96033	2.12603	3.86842	1.36408	4.59112	2.48138	1.80921	2.09281	2.03117	1.04675	3.0025	1.05703	1.22379	1.88453	0.901149	1.26333	1.33531
Pita_unigene44561	0.706035	0.285839	1.72469	1.64695	2.72295	0.925569	0.500739	0.569683	0.235373	0.698188	0.127587	0.202808	0.419784	0.19107	1.21022	1.06573	0.167567	0.538593	0.286676	0.367501	0.102692	0.0492928	0.211686	0.0469651	0.318072	0.0698299	0.426683	0.109738	0.0770447	0.0413373	0.107898	0.0227451	0.191947	0	0.0636191	0	0.102993	0.0751271	0.111301	0	0.0818439	0.209236	0.359186	0.198585	0.435429	0.0788063	0.31033	0.411912
Pita_unigene4453	1.07207	0.981568	1.30573	0.330494	0.937433	0.883916	0.328628	1.92533	1.44219	1.20734	0.865852	1.06514	0.413411	1.17959	1.53656	2.37057	0.756558	0.326043	0.376423	0.82386	0.566268	0.740539	1.46858	0.428794	1.15648	1.07086	0.560192	0.604858	0.606994	2.09069	2.4351	1.70265	0.472862	1.02939	0.946575	1.94499	2.56815	2.43295	5.72836	2.57264	1.50457	3.16199	0.665875	1.34912	1.42999	1.05915	1.30919	1.02695
Pita_unigene44521	2.30908	4.75475	10.2002	6.08174	2.86818	6.49238	6.30475	12.8014	13.01	10.6138	4.61982	17.4497	7.79098	10.1504	7.58408	3.61027	13.706	6.53117	5.94034	7.61292	3.73117	1.38348	3.06584	7.61375	4.36598	5.51216	5.34375	2.03686	3.08513	0.204399	3.5221	4.59538	7.18854	2.17305	1.56081	2.01276	2.60897	5.40844	4.44367	2.31611	1.62069	0.829817	4.42285	7.78936	4.03387	6.65753	2.86969	2.00886
Pita_unigene4452	0.188163	0.200998	0.292862	0.208401	0.607874	0.148124	0	0.301601	0.17907	0	0.167385	0.177454	0.195541	0	0.351615	0.202577	0	0	0	0.401998	0	0	0	0.17895	0.160565	0	0.133345	0	0	0	0	0	0.223107	0	0	0	0.372869	0	0.207457	0.351021	0	0.308237	0	0	0	0.0776891	0	0
Pita_unigene44515	0.385017	0.602405	1.51779	1.08438	0.162924	2.1615	0.726407	0.327081	0.439663	0.208394	0.106116	1.57145	0.575246	0.90595	1.13527	0.162622	1.19613	1.02674	0.102026	0.216159	0.0511394	0.150425	0.99743	0.813639	0.426534	0.466258	0.252944	0.0545347	0.143963	0	0.267891	0.0567124	0.179847	0	0.105575	0	0.104654	0.685818	0.166295	0.0469342	0.254902	0.105818	0.94773	0.855742	0.380462	0.24377	1.10215	0.0511454
Pita_unigene44513	0.69922	1.64674	0.5645	1.73094	0	1.2736	0.66746	0.121106	0.317252	1.13634	0.166901	0.99309	1.5241	0.381437	1.18763	0.603978	0.862271	0.190176	1.4647	0	0.577284	0.416585	1.06512	2.24933	1.76388	2.17453	2.26598	2.93461	1.94931	1.51538	1.93506	2.49005	1.5914	1.88494	3.68399	1.34261	1.64942	1.96463	1.53089	2.73937	4.30437	0.951223	1.44983	0.7395	1.06657	1.13268	3.08809	0.494351
Pita_unigene44509	0.141595	0.155506	0.129727	0.124669	0.487873	0.243501	0.0719416	0.0658046	0.132989	0.190584	0.176259	0.0241954	0.199555	0.0395382	0.539922	0.174518	0.170205	0.205478	0.171779	0.0642401	0.186073	0.0546801	0.03543	0.116589	0.707297	0.317261	0.12722	0.417558	0.340904	0.331194	0.56912	0.318567	0.619898	0.352185	0.784876	0.54116	0.42879	0.275121	0.40438	0.297714	0.811873	0.426062	0.13731	0.13624	0.132942	0.0462434	0.415245	0.20341
Pita_unigene44473	3.97202	8.54334	2.16627	4.19334	6.65012	8.87152	3.80691	2.53489	11.0682	6.42804	6.41855	9.12076	5.88264	2.55978	9.53018	6.09903	8.8857	4.35158	6.5237	3.66297	9.23436	6.15347	4.28835	11.1686	15.2107	8.32526	14.4578	19.5604	14.4251	9.71248	17.9044	12.5726	23.0049	27.3594	24.8962	15.2419	11.2218	7.75781	15.1722	14.6458	15.337	9.26826	8.96977	6.5358	13.994	9.07749	13.3937	6.46381
Pita_unigene44385	3.3418	2.05599	5.64261	4.81345	4.0246	3.65877	3.81931	3.52304	2.3388	4.64112	4.22389	3.54861	3.25639	3.59731	3.17587	5.479	4.03719	3.73708	3.51791	3.57103	2.22482	3.57035	4.18113	3.49532	1.29368	1.60051	1.30826	1.61963	2.35326	2.12899	0.948589	1.96753	1.30758	1.4252	1.14919	1.16656	1.81403	1.61932	1.56466	0.906534	1.07733	1.90701	1.81691	3.93014	3.55274	2.20625	4.03208	1.89725
Pita_unigene44357	4.75566	1.13714	0.942652	1.73553	0.712055	1.11645	1.28125	1.65844	0.923867	1.14476	0.401534	1.73304	1.2109	1.78545	0.877072	0.58487	1.91298	0.809671	1.35875	2.78898	0.414891	0.734584	1.49174	1.56846	1.41641	3.10868	2.97171	3.99498	1.86859	13.7411	4.91104	2.53692	3.97334	5.99466	3.25504	4.30483	4.42556	3.73896	8.3529	7.42854	3.40411	4.21162	0.855237	0.785397	1.81814	1.89861	0.906783	0.79139
Pita_unigene44343	1.35579	0.21615	0.523689	0.112464	0.398567	2.24172	0.128161	0.107575	0.19282	0.128394	0.209099	0.083071	0.0515866	0	0.146251	0.133645	0.091403	0.178049	0.0754898	0.10633	0.0757104	0.123766	0.285284	0.0944223	3.12677	4.20801	0.624152	0.215678	0.710087	5.46263	0.609605	0.083863	0.0884934	0.312498	0.390847	0.772839	0.646154	0.123082	1.12147	1.48164	0.226298	0.235749	0.181757	0.289286	0.267627	0.386969	1.17093	0.126484
Pita_unigene44322	3.90252	3.88545	1.97694	5.5755	7.26285	9.66754	0.906913	0.952905	1.00462	1.07146	0.109122	0.807917	6.82916	1.07872	2.4868	0.89184	3.26278	2.69149	2.46536	5.27966	1.63008	1.18579	1.0795	1.52563	4.07252	2.93723	2.4968	62.9651	8.53647	2.7596	3.08466	13.9378	2.52771	20.0346	6.94742	8.75854	3.2281	2.50016	0.74096	2.36476	7.60109	2.61086	0.812101	0.715062	1.11786	0.751736	1.35981	1.26198
Pita_unigene44308	1.13265	1.00908	0.9817	0.238376	1.15657	0.392301	1.13697	0.7661	0.778223	0	1.90473	0.573497	0	0.939695	1.67523e-05	0	1.10426	0.186526	0	0.172022	0.332113	1.24615	1.01973	0	0.228844	1.11396	0.999103	0.550816	1.21035	1.10868	0.453651	0	0.296611	4.41695e-10	1.25789	1.76522	0.811673	3.20831	0.450672	0.710181	2.59648	2.37224	0.419862	0.281315	0.793676	0.914158	0.691566	1.08619
Pita_unigene44293	13.4776	20.6373	34.024	39.201	27.1327	24.9893	26.9567	8.5047	18.7848	20.0373	11.8952	22.7526	23.6726	11.7382	30.0375	20.4893	21.554	27.9522	23.7644	12	44.6648	18.4525	20.6424	21.7708	5.62329	21.9823	35.18	8.14526	12.9176	11.5141	1.64734	9.5971	7.18288	3.70162	4.69716	4.73699	2.01169	9.24663	7.00335	3.40342	5.48933	5.63471	9.89255	45.2165	16.3679	13.2698	21.1235	15.7259
Pita_unigene44288	0.317705	1.68037	1.02414	0.323077	2.24947	1.3841	0.485231	0.208671	0.912433	0.364764	0.188442	0.710791	0.162735	0.413573	1.25242	0.361361	0.781064	0.55045	0.73113	0.74541	1.25111	0.133874	0.647192	0.735933	0.10857	0.154744	0.202532	0.218742	0.128003	0.0457927	0.167271	0.226747	0.34555	0.0469546	0.0234869	0.269231	0.0698963	0.138679	0.394476	0.146064	0.151282	0.283415	1.31055	1.08898	1.05142	1.54858	0.490959	1.61501
Pita_unigene44244	10.3058	7.74411	9.15826	5.85838	10.0808	6.93863	8.0587	30.0243	18.7703	11.4404	10.5708	10.5867	9.91911	20.8469	31.427	14.5269	11.3499	12.8893	14.7874	28.8458	16.2367	16.9916	12.2184	12.777	32.8124	12.9902	5.87269	36.7514	26.9948	8.96409	77.4582	29.014	22.6702	79.7027	63.7978	41.7037	56.5917	29.2611	20.6174	64.638	63.2362	21.0348	26.7075	19.5421	16.1809	27.1082	34.2637	20.1832
Pita_unigene4424	7.64033	7.14437	6.80616	10.0226	8.60473	7.62394	6.47889	4.28886	4.70895	6.30806	6.69529	6.04666	5.74527	2.44191	7.47029	7.84476	5.09516	8.07766	5.60484	2.76568	4.70925	3.74735	4.93212	3.83346	1.00047	6.24355	5.62049	2.29008	1.89855	3.88664	0	6.53036	4.47712	1.09144	1.44839	1.82809	0	5.33429	6.25677	1.05919	0.452628	2.3205	0	7.16045	7.31699	4.00064	4.32255	3.15644
Pita_unigene44217	1.35185	2.40103	2.39809	0.640638	1.64934	0.790718	3.80352	2.04372	4.44663	2.4671	7.36815	2.44063	1.90895	0.770811	5.65386	6.91706	1.27816	4.27077	0.802069	1.28482	0.613757	1.0182	1.44598	0.820637	0.886859	0.220781	0.440029	0.0704176	0.394201	0.335252	1.09645	0.375966	0.604487	0.33089	0.258947	0.624442	2.43054	1.1832	5.9845	0.590399	0.406773	1.16482	1.45582	1.75207	2.4521	2.18146	2.88054	0.728184
Pita_unigene44208	0.996357	0.492847	1.01699	0.943748	0.136679	0.452985	0.925145	0.957206	0.448129	2.48132	0.332417	1.48814	0.95625	0.709341	0.487393	0.250492	0.522351	1.52701	1.24031	0.814104	0.54538	0.154027	1.14538	0.921708	0.841206	1.21866	0.181543	0.183556	0.189868	0.454648	0.515373	0.465332	0.272959	0.344925	0.213947	0.196877	1.08635	1.09205	0.522854	0.41451	0.21895	0.454204	1.24761	1.19711	0.458274	0.703029	0.833854	0.687285
Pita_unigene44202	5.67535	7.46838	7.972	7.86155	14.2693	3.30586	6.01601	1.83255	6.79929	2.95821	5.91647	1.78521	5.7701	4.00209	8.90549	9.1033	2.8339	5.65366	2.18388	3.15425	8.74833	7.84862	5.34623	1.39393	4.37856	5.61012	4.22084	1.42876	5.82439	3.51973	2.38048	3.90706	1.72864	0.343665	2.91415	1.94487	1.93255	2.24241	1.32619	1.17786	1.4089	3.51285	7.24523	2.39616	1.89551	3.88048	3.87975	5.05016
Pita_unigene44140	2.98803	2.57711	1.43283	1.82433	2.25285	2.05962	2.17618	3.37979	2.2129	2.54303	1.80659	2.37692	2.04331	2.10028	3.11645	2.67479	1.5406	1.89715	2.42405	4.30377	1.31364	1.80519	1.20321	1.47988	3.25925	2.0628	3.05123	6.2508	2.7347	4.72857	5.58995	3.81586	3.64721	5.25251	6.22757	4.30313	7.23704	6.88704	5.35657	10.6892	8.85729	4.7112	2.38893	1.5621	2.63953	1.57174	2.37505	2.80676
Pita_unigene4410	6.69233	6.51204	30.2162	15.5781	37.2217	13.4631	10.99	3.39325	11.2853	11.4144	2.85974	5.70627	5.96694	2.80039	52.8435	12.7055	4.94919	20.7183	1.41115	0.820793	1.5919	1.24895	3.85189	2.38294	7.62851	1.88943	1.11986	0	0.232297	0.606008	0.408292	0.588043	0.910709	0	0.0730421	0.139973	0.507039	1.55272	1.38035	0.0324574	0.0705073	1.17349	1.78392	3.87621	3.60452	1.15031	4.84519	3.7554
Pita_unigene44090	39.2736	34.9479	23.4789	33.089	17.9308	55.3838	34.2821	14.9178	27.019	26.5905	42.9629	28.2959	30.5185	24.3912	30.4331	23.3487	36.5517	27.5663	19.2868	14.0737	34.2631	17.2598	40.2807	32.9169	110.413	81.9981	57.4181	72.0143	146.626	296.145	28.9296	15.4798	23.2666	66.0508	69.7922	77.2989	65.0841	23.2424	36.4319	226.281	77.8	46.6732	32.9414	22.7392	27.433	37.5635	70.4045	22.5824
Pita_unigene44064	12.8627	25.4189	45.9879	56.9286	56.2234	70.5384	58.2026	80.7594	91.0306	98.9862	281.076	94.8859	73.2657	76.6233	50.7716	112.903	78.1907	57.1335	72.7234	24.2178	25.3085	92.0754	53.0355	71.2106	44.1441	16.2532	29.9815	33.4152	31.1528	6.33137	75.9323	15.5589	50.2516	38.9183	35.623	8.30239	48.5682	16.4917	93.4944	54.5108	24.5134	10.7142	59.4987	21.3397	33.2844	229.6	79.1107	9.04868
Pita_unigene44045	0.124835	0.124828	0.36314	0.181205	2.59183	1.10591	0.0944188	0.0742919	0.332907	0.237942	0.144388	0.0764927	0.068334	0.32435	0.812943	0.0492225	0	0.515436	0	0.49168	0.177493	0.0984506	0.0716508	0.065207	1.35596	1.2482	0.781643	4.26649	0.228608	0.771929	1.41546	3.46992	2.09103	3.26248	0.794466	1.39997	1.6185	2.591	2.25831	2.37824	1.43679	1.01331	0.103168	0.174781	0.197116	0.0891188	0.451393	0
Pita_unigene44015	20.3066	20.8215	12.4183	17.0279	16.4617	18.1394	11.1237	35.3898	23.5832	19.478	21.1507	14.4763	20.7185	34.6823	36.6919	19.8564	15.4955	10.6485	15.2963	64.2595	38.2077	26.5756	18.6968	16.8521	82.3828	28.0853	20.5276	346.224	80.678	41.621	259.426	144.376	83.3143	470.578	233.717	137.242	332.685	109.286	76.0003	362.718	176.154	90.7785	33.5005	23.5859	34.0755	25.4336	27.2338	20.9216
Pita_unigene44004	6.98195	4.66847	7.29081	4.57665	5.24611	4.72281	4.79189	4.24471	4.34479	4.96943	7.27185	4.96855	5.20641	3.33528	5.58946	7.54863	3.66765	6.13181	2.98906	3.81833	2.41099	3.84559	2.49969	2.37259	22.0035	12.7603	11.8635	23.8368	12.4064	13.2923	34.1641	28.2101	25.5953	21.7489	27.2318	26.3909	18.3607	15.1587	15.2924	9.38455	10.3387	7.20659	2.32933	1.68125	2.71141	0.542949	1.26709	3.34262
Pita_unigene44	0.958402	2.12022	1.52191	1.36987	1.33271	1.33673	0.429452	0.553889	2.31728	2.18347	1.25368	1.55184	2.35597	1.06542	4.51425	2.85144	1.7789	1.37726	1.12456	0.13344	3.61633	0.892237	2.0885	0.87561	0.904206	0.876495	0.571601	0.511252	1.2528	0.506416	0.32924	0.475217	0.640081	0.109234	0	0.705885	0.574506	1.42743	0.130352	0.100875	0.257912	0.386226	1.48519	0.326058	1.06099	0.820773	1.11381	1.49757
Pita_unigene43862	3.33917	5.2891	6.24961	2.80889	8.84985	10.7324	3.69884	5.04422	8.06306	3.09894	11.1748	12.8341	3.32675	5.69877	10.0592	9.07643	11.1761	4.65345	2.4226	4.11176	8.64215	8.28114	4.05244	10.5551	16.1518	9.66925	15.2908	48.0455	17.8537	6.59373	21.3505	18.2334	27.5269	62.2375	29.2094	13.8722	13.2741	7.04313	14.4626	30.9715	11.0457	5.32023	4.24476	2.91314	6.50318	7.31605	7.22946	2.91538
Pita_unigene43799	68.7069	143.974	248.586	186.718	289.705	236.597	53.058	142.785	74.0222	98.6377	59.1635	98.2223	136.753	217.84	147.906	187.468	153.492	88.507	74.2636	240.33	150.434	170.228	66.6332	122.62	551.598	245.878	152.372	998.249	527.041	191.644	502.779	389.708	190.844	633.585	688	225.894	304.697	195.411	115.248	318.923	325.013	140.678	125.265	76.1631	68.6135	64.9523	143.587	75.6963
Pita_unigene43798	16.8329	3.96455	41.4798	29.9216	42.8454	24.5119	11.3431	29.4897	4.12484	20.1585	28.4654	13.3131	27.1444	36.7436	7.82728	41.2523	15.9754	15.4577	14.0573	30.3843	5.75449	32.2255	11.4757	11.4599	2.45055	7.33171	2.13466	33.0988	3.08976	8.74936	2.35787	6.28282	2.42367	18.2411	1.27244	2.05165	2.62414	9.89554	2.78585	28.9854	2.05135	4.86125	1.16544	4.11332	0.877541	14.4536	1.76779	1.02345
Pita_unigene43795	0.585427	0.348786	0.792258	4.92649	0.477152	3.24807	0.541079	0.325275	0.0798232	2.32285	0	1.57861	0.965013	0.427386	0.458376	1.137	1.38236	0.915163	0.501046	0	0.076258	0	1.52918	0.376456	1.81107	2.98818	2.15901	4.22682	7.72037	1.66911	2.06944	3.30526	1.36664	2.93502	9.46639	2.17361	0.74896	1.33581	1.40782	1.42182	3.72658	2.76156	0.57966	1.09915	1.11682	0.217022	4.74441	0.828939
Pita_unigene4379	0.666129	3.65898	11.0217	1.30556	8.28499	1.70876	0.984609	0.581604	1.18188	0.992024	1.31052	0	0	0.330435	3.50348	3.09391	0.157511	0.839275	0.793668	0.187595	0	0	9.36962	0.662089	1.79044	0.304174	0.436936	0.37599	0.41486	0.0894503	0.307708	0.0981578	0.104003	0.453702	0.182338	0.352095	4.96381	2.57427	3.15328	3.04552	2.90918	29.749	0.455278	0.524947	2.63754	0.167233	8.61071	0.528525
Pita_unigene43776	0.356507	0	1.23008	0.185141	0.710679	1.22339	0.503224	1.94187	0.237266	1.52028	0.258172	0.454262	0.338794	2.08854	0	0.702641	0.517166	1.07509	0.578274	30.9121	0	0.973506	1.69716	0.0775251	0.789243	0.569327	5.6489	3.78771	1.39897	0.58632	0.864691	0.275788	0.779054	16.0733	0.768677	1.23598	16.1585	1.81604	8.61465	6.46052	0.660665	6.14227	0.341164	0.0869504	0.882053	0.784193	14.873	0.247687
Pita_unigene43695	8.16176	3.05764	3.04807	4.79506	5.82163	1.7371	2.66651	1.52197	3.98539	3.47686	1.715	1.20491	5.39394	1.3359	3.06777	3.61354	1.36239	5.13266	1.09579	0.584049	2.96274	2.47329	3.82168	0.617105	3.66383	2.02304	2.93066	0.233188	3.30016	2.44844	3.08788	2.19646	1.55381	0.337593	1.1321	0.877203	1.2325	0.802539	2.142	0.302513	0.109547	1.01484	1.58424	2.08234	1.99237	1.86207	2.00517	1.52927
Pita_unigene43667	1.33199	1.93626	0.848668	0.851677	2.97218	0.803112	1.3487	0.405793	1.36327	0.874077	1.68265	0.73084	0.0973551	0.3559	4.86059	1.31276	0.677158	1.23306	0	0.101059	1.04619	0.186415	1.65687	0.26733	0.680347	0.327869	0	0	0	0	0.893267	1.90248	0.224104	0	0	0.284546	0.0971718	0.463728	0.103122	0	0	0.391551	0.0980389	0.300248	0.101457	0	0	0.0947711
Pita_unigene4366	0.375514	1.14505	1.26776	0.436238	4.34579	1.3839	0.271654	1.47205	1.22616	0.126093	4.36434	2.05528	0.225194	0.69159	1.10135	2.71993	0.499173	0.0992996	0.414064	2.2867	0.848335	3.13865	0.164983	1.64236	3.59476	4.0036	1.09843	1.57195	1.1721	3.61504	3.20747	4.98479	2.56411	3.22215	1.57221	4.78304	2.11447	4.13402	1.76017	2.89471	1.81266	3.32361	1.90298	3.71917	1.74442	1.73189	1.17606	3.33496
Pita_unigene43655	2.44193	1.43255	1.08862	0.377441	1.29103	1.64392	0.871458	1.22085	1.1377	1.64655	0.65849	1.83172	0.877959	0.875572	1.62851	1.46222	1.34314	1.09672	0.87446	3.6269	1.06581	1.91119	1.15036	2.49134	1.07425	1.25052	0.745681	3.25111	1.46902	1.283	1.13433	2.39075	0.714486	5.52044	3.0356	2.76424	4.13197	3.32306	4.34748	4.83571	7.56099	2.67437	0.57317	1.10758	1.26107	1.08073	2.37715	1.10419
Pita_unigene43639	5.06037	9.95066	8.12246	6.3225	14.2167	3.84324	1.47398	2.8907	4.41825	2.56448	3.84484	1.68429	2.17056	1.58468	9.68939	5.14423	0.914919	1.27249	1.25796	2.05799	2.85993	1.12968	5.57653	1.11978	2.90597	3.47986	3.97346	0.44942	1.79464	3.46779	1.80279	1.14115	1.74431	0.0868254	0.260553	1.03809	0.732352	0.999975	2.14244	0	0.272348	0.977006	1.60088	1.44546	4.25783	0.806803	6.85397	1.24411
Pita_unigene43578	22.587	0.134723	3.59934	0.0674286	14.3476	0.136291	18.7497	5.38831	0.0560676	0.124112	17.788	0.135125	0.0606728	4.14215	0	16.5035	0.0660741	19.4555	0.175493	4.61916	0	17.7775	17.3607	0.0607277	19.7695	4.21152	42.1568	17.301	15.0736	38.7154	21.518	5.89493	48.6823	17.0149	19.6121	42.9751	20.8628	6.36861	58.0174	21.2306	23.297	41.2515	19.7729	4.41066	38.5303	16.0147	18.3596	24.9775
Pita_unigene43577	128.662	97.884	106.206	90.4849	71.1867	73.3242	199.764	170.757	142.504	184.426	148.009	140.629	174.733	167.258	96.6473	138.047	129.488	225.636	120.262	151.02	81.3431	103.424	115.863	81.6894	21.2339	50.7098	54.007	5.35011	29.7621	47.9844	26.9328	21.429	46.483	14.908	33.4168	47.4536	57.3626	83.407	78.1606	24.9032	31.6772	91.6823	110.791	142.454	96.4784	87.8736	50.1132	99.2357
Pita_unigene43551	0.536905	0.336441	2.05947	1.45136	2.11746	1.28474	0.879201	0.500035	0.848385	0.653633	1.08706	1.52316	0.469494	1.38155	1.5651	2.17409	1.06456	0.78479	0.53594	0.943048	1.08927	0.481013	0.911409	0.590028	0.661977	0.157416	0.86201	0.227911	0.301604	0.421292	0.555066	0.947216	0.64092	0.475295	0.106199	0.518081	0.187217	0.330842	0.685213	0.415063	0	0.540399	0	0	0.836798	0.366685	2.98085	0.667335
Pita_unigene43547	44.7872	16.4331	2.34175	4.20558	5.9615	6.98787	20.5956	1.90607	12.0696	6.37067	6.59549	15.399	4.36286	1.89954	8.83522	8.53563	7.819	21.0138	6.64859	2.8866	5.49528	8.59644	15.0572	9.27149	3.21714	20.1786	5.89535	21.548	11.2523	32.0251	8.50137	28.5836	8.21795	31.7679	16.3066	34.9793	7.84846	31.7709	13.2651	38.0674	25.0331	42.717	4.25393	16.6896	5.30422	23.0913	9.33486	21.7497
Pita_unigene43485	69.0688	8.92955	28.0077	13.5433	17.6416	19.185	28.8769	10.8854	23.6565	21.441	31.183	20.3514	23.3922	16.0014	17.999	36.0611	23.1835	53.6088	7.28405	4.24833	7.79219	12.0497	10.6916	11.1832	9.96556	20.3701	14.5465	0.0546301	1.20949	2.87512	2.85938	17.8308	31.7365	0.105538	2.48408	5.30205	2.13713	24.5544	24.0409	0.539497	0.535003	17.1736	5.69487	28.9352	14.1376	11.0259	8.87892	42.0475
Pita_unigene43464	19.8806	0.539413	7.56636	0	2.55219	2.36543	0.680235	2.32673	1.84428	0.171271	0	0	0	0	0.938036	5.1884	4.64279	0.502984	0	0.0890448	0.419571	0.164498	8.45231	0.0786019	5.0012	2.11692	3.90095	11.015	4.72799	3.73683	2.45438	4.03988	6.44023	1.32801	5.88569	5.31885	5.83226	1.53434	3.31144	0.946284	1.00476	2.42143	0.856686	0.440849	0.408735	0.317953	0.993179	4.35223
Pita_unigene43452	6.90063	1.83263	4.85495	5.7189	3.80936	2.33629	12.0246	7.00232	10.0903	7.99499	13.453	5.83655	8.63402	6.98566	5.31683	10.7203	6.07719	18.5904	3.94557	2.71212	2.35613	3.64736	5.90365	3.47741	4.07861	2.73178	1.93026	0.0393463	1.86428	0.444492	2.7469	3.17976	3.16029	0.152033	0.684228	0.799356	4.09179	7.54122	5.18709	0.371439	0.733482	2.71531	7.59301	11.8048	5.15033	4.52222	5.76189	3.85855
Pita_unigene43408	34.9891	47.8581	67.097	32.7973	48.3231	34.1048	30.88	37.919	50.0407	42.1429	56.7443	38.5227	19.7714	23.2478	42.1474	38.0993	27.4267	28.3587	25.8786	15.1409	29.7163	30.3264	33.6549	30.4489	25.2536	48.1345	46.6619	13.3181	18.9251	29.5161	13.2847	25.864	24.0772	10.8399	9.6324	17.7651	24.6353	34.5839	41.9902	31.0914	12.7143	42.2897	65.5178	75.8291	54.8715	81.2981	56.729	56.3189
Pita_unigene43399	0.388828	0.944448	5.92252	2.72119	4.73528	1.41139	1.44754	1.75963	1.64181	3.63611	3.44319	1.21611	2.54293	1.83106	2.79671	4.57552	1.74206	2.30354	1.17276	0.762187	0.769081	1.5753	0.953182	0.909739	2.15578	1.59002	0.939854	0.241687	0.848569	0.842407	1.35444	1.8038	1.348	0.256805	0.770723	0.781813	1.36693	2.234	1.49551	0.165994	0.360573	1.3387	1.51264	2.8276	1.46292	0.976017	2.17254	1.54217
Pita_unigene43390	1.96553	1.97468	4.33781	2.93646	5.06457	1.44186	1.08439	1.24855	1.03454	1.15045	2.02607	0.92306	1.36499	1.13694	2.98985	2.31858	0.720413	2.56834	0.890482	0.627748	0.537799	0.695703	0.61328	0.202515	1.58161	1.7634	0.245574	0.693759	1.2193	1.58885	0.897407	1.01437	0.238143	0.237236	0.823694	0.295694	3.38335	2.28897	0.718462	1.36782	2.53931	2.08792	0.686285	0.834585	0.381389	0.610731	1.43263	0.829139
Pita_unigene43379	14.0074	2.44877	2.67098	13.2593	6.58111	4.37679	9.10225	5.23026	1.31971	5.84721	8.89383	1.76704	10.1503	4.79481	1.48144	5.85169	1.61727	9.27031	5.81311	5.55388	1.01822	4.29743	5.1383	1.66654	24.5701	8.54297	10.6659	34.9343	15.6118	17.3698	53.9187	31.8074	30.9737	40.7877	69.9645	23.4034	21.0008	10.3531	9.25264	14.0513	17.2163	9.3445	1.86734	1.57066	2.40976	0.577595	2.31312	2.12216
Pita_unigene43369	1.85214	2.31417	0.932056	0.778104	3.61557	0.970948	0.498018	1.02227	1.64966	0.909272	3.72456	0.65507	0.934188	0.532318	2.3396	3.43824	0.260345	1.25979	0.964248	0.733504	2.27575	3.09449	0.857137	1.02311	4.14497	4.83303	5.32665	0.911511	3.26813	2.54298	5.58556	5.75869	6.67163	0.667039	4.60449	2.6766	4.99968	6.31293	7.18204	0.989484	3.05633	3.21784	4.38376	4.3749	6.08091	0.925265	3.37564	2.19067
Pita_unigene43368	2.78721	4.53765	7.65925	5.34469	5.63953	4.51668	3.93226	1.79209	1.50974	2.35824	2.80732	1.62892	2.33663	1.97682	3.13592	3.69978	2.03516	4.49851	1.85161	1.34885	3.68836	1.33657	2.21858	1.11596	3.86926	0.219737	0.808218	0.908962	1.10742	1.6449	0.312625	0.661043	0.149649	0.219471	0.571609	0.253043	0.19764	0.207721	0.461677	0.273597	0.91313	0.468306	0.807487	0.697062	1.17614	1.40898	2.02042	1.961
Pita_unigene43352	0	0.0926334	0.856804	1.83771	0.743219	0.821459	0.437995	0.922063	0.165231	0.441219	0.269756	0	0.265441	0.646622	7.67161	0.458806	0.231313	1.20873	0	0	0.432305	0	0.265895	0.0809903	8.14189	0.198377	2.30892	9.74465	2.67939	0.525115	24.5156	0.960465	3.25623	17.6743	6.06678	1.03339	23.4865	0.737748	2.06219	9.36965	5.07766	1.69246	1.15833	0.0908763	0.737337	0.573016	1.39527	0.258649
Pita_unigene43347	1.34708	1.67402	5.24394	2.60025	7.75914	2.90918	1.81208	1.6428	2.04019	1.77005	1.59631	1.474	0.967824	1.65975	8.48805	2.28568	1.45688	2.37624	0.922237	1.66957	1.7839	1.10172	1.76559	1.13291	1.96773	0.948723	0.849704	0.776561	0.908796	0.332491	0.948606	1.07322	1.15796	1.0911	0.659442	0.456679	1.26323	2.52417	1.83798	0.909078	0.899586	1.80658	1.29146	1.72049	2.03133	0.887029	2.044	1.56781
Pita_unigene43336	184.594	9.57977	0.311563	1.93714	0.688051	2.31305	2.69482	9.53836	28.9131	35.0056	44.3977	18.758	5.30195	0.147291	0.755064	17.6698	32.1991	0.464756	74.5864	2.51678	0.470364	106.07	36.8665	200.864	1.8695	0.728193	19.3894	0.830135	1.0325	0.797703	1.13898	0.523571	2.04272	0.800911	1.13186	4.09764	0.159608	0.954507	2.21122	0.288354	0.469919	2.56277	8.25017	0.498157	2.01381	3.37025	24.5441	59.5321
Pita_unigene43334	0.205065	0.108437	0.565566	0.245139	1.9699	0.233363	0.134028	0.0335449	0.154248	0.14362	0.0856994	0	0.0585461	0.0693182	1.40764	0.39437	0.0259096	0.230799	0	0.0439575	0.057279	0.0445192	0.108404	0.0267903	0.276566	0	0.0566642	0.0917631	0.0537254	0	0.0601372	0.0951848	0	0.0295451	0.0591373	0.0283045	0.085446	0.0908002	0.337823	0.0262737	0	0.119342	0.0294688	0.119435	0	0.203575	0.266663	0.0573979
Pita_unigene43294	13.6821	3.14365	6.37034	0.103357	9.23067	13.2952	6.42258	23.8428	4.69182	0.223975	6.9025	13.1066	0.362915	26.6432	13.6328	11.2141	12.1651	8.88331	0.226055	35.7448	4.46783	16.3895	17.0185	24.8256	27.5304	7.3633	10.5362	43.0904	27.8687	21.8094	36.0101	20.8104	22.1338	51.6067	28.238	35.4939	89.9927	18.9187	45.7045	40.9249	41.0213	45.3917	7.87095	5.17421	26.7211	8.4599	12.9011	13.3781
Pita_unigene43293	1.1591	2.30778	7.91248	2.40583	5.43006	4.49342	2.64608	10.7003	3.46712	3.35165	7.12184	3.73428	3.53779	13.6999	4.59703	8.71751	5.80761	3.41271	6.39282	32.6816	5.67084	16.3458	6.92571	8.65197	7.36527	3.49353	5.66582	10.337	7.39746	5.2101	21.9118	5.09523	7.98231	72.2128	23.8228	27.5088	46.1794	9.33323	13.2774	53.9243	43.8742	16.4164	19.27	8.78442	19.7781	15.9848	18.5106	19.047
Pita_unigene43253	0.976676	0.419669	5.17586	3.85459	12.3068	0.0827298	6.11854	1.50773	0.862148	1.97034	1.54942	0.344029	1.09282	3.74273	1.08663	14.8844	2.03226	16.1957	0.39823	0.74777	0.156704	0.726336	2.41059	0	0.562266	0.987319	0.542498	0.837986	1.5449	0.158528	0.982653	1.13107	1.19782	2.31664	0.0940497	1.76987	0.961204	3.15186	1.27415	0.501289	0.313041	4.20567	0.96882	5.67599	2.50411	2.75231	1.18058	2.34566
[truncated: 1,199 more rows]

## Sheet: Annotation
target_id	ID	p	short_description	Curator_summary	Computational_description
[truncated: 2,192 more rows]
