# Supplementary material for: The Transcriptional Landscape and Hub Genes Associated with Physiological Responses to Drought Stress in Pinus tabuliformis
Source: Int J Mol Sci. 2021 Sep 4;22(17):9604. doi: 10.3390/ijms22179604 (PMC8431770; doi:10.3390/ijms22179604)
Supplement: Supplementary file 1 [file ijms-22-09604-s001.zip › S2 ABA-related DEGs.xlsx]

## Sheet: Expression
target_id	C1-1	C2-1	C3-1	C4-1	C5-1	C6-1	C1-2	C2-2	C3-2	C4-2	C5-2	C6-2	C1-3	C2-3	C3-3	C4-3	C5-3	C6-3	C1-4	C2-4	C3-4	C4-4	C5-4	C6-4	D1-1	D2-1	D3-1	D4-1	D5-1	D6-1	D1-2	D2-2	D3-2	D4-2	D5-2	D6-2	R1-1	R2-1	R3-1	R4-1	R5-1	R6-1	R1-2	R2-2	R3-2	R4-2	R5-2	R6-2	target_id
Pita_unigene4288	1.31877	3.51057	0.907672	2.22342	4.75465	4.90762	0.752412	1.55948	10.9329	2.04211	3.44425	4.49244	2.24655	1.20938	8.90036	3.99145	5.50787	0.988912	1.49219	1.23698	4.74027	2.50975	1.10904	5.46722	5.12818	4.16552	6.59468	15.9867	10.8627	4.47532	4.44191	4.87089	18.0061	25.0109	11.4761	12.0849	4.24773	4.1385	28.5195	25.3024	12.8315	8.0676	3.19147	5.34867	8.71622	19.9705	16.2604	4.87874	Pita_unigene4288
Pita_unigene57214	7.81419	11.7324	15.4824	8.09508	6.80986	10.138	5.53441	11.066	10.574	8.58697	7.00519	8.93478	5.83562	11.5778	14.3769	5.45667	6.11415	4.90087	4.59832	10.2146	10.3071	3.35919	4.47778	6.07633	51.2868	38.6104	22.9165	70.5369	40.6357	20.1143	64.7979	58.7311	30.3333	68.3257	58.2426	39.6524	21.5902	26.2604	14.1599	23.181	17.07	10.1345	10.9737	11.4978	6.72328	8.50489	9.96069	5.86478	Pita_unigene57214
Pita_unigene8323	0.843067	0.475787	0.488357	0.550881	0.609594	0.260837	1.57653	0.210492	0.37193	0.653753	0.665767	1.01038	0.65625	0.184092	0.438871	0.685153	0.933034	1.18971	1.18184	1.28856	0.444303	0.822887	2.53013	2.05257	0.669348	1.25128	2.96073	10.1851	1.34337	0.099618	2.80067	5.82324	10.5082	21.3477	4.55924	1.47064	0.828661	3.59657	4.85717	2.88709	3.04966	0.408692	0.508245	4.15377	6.29476	1.87143	0.585225	0.456156	Pita_unigene8323
Pita_unigene62985	1325.88	3108.66	464.106	6959.85	8011.85	4186.49	2216.91	604.043	3086.78	5267.94	2686.15	2560.26	5546.76	782.382	4768.93	2790.99	1846.69	2378.94	4601.79	605.044	4793.93	2471.09	1770.59	2119.13	1652.91	845.711	619.761	1688.39	3460.2	1521.93	423.822	551.815	328.991	713.89	1320.97	1468.74	343.756	429.759	236.377	322.561	2368.24	907.801	1309.17	714.105	556.174	741.141	3172.19	2306.11	Pita_unigene62985
Pita_unigene2665	32.4802	27.1758	39.8383	30.5067	65.5174	39.0685	30.6083	37.4029	28.6774	37.5726	43.8829	43.2303	38.9016	32.9351	38.0503	47.0737	34.4075	31.4815	26.8157	32.5105	27.092	33.8642	29.8573	33.6036	124.658	85.3262	66.2562	245.204	138.412	71.5505	161.513	134.762	149.062	178.333	189.503	129.649	103.329	89.6488	83.9852	156.677	113.769	62.0987	39.6015	43.5997	36.202	37.1053	47.6679	24.665	Pita_unigene2665
Pita_unigene2481	22.4267	31.4293	14.6022	17.1646	7.728	21.0092	3.74602	8.95891	4.38201	6.43133	3.59725	9.5653	8.32099	8.99336	4.33603	5.60813	4.72861	2.50257	9.40352	13.167	4.71395	4.44797	6.52997	9.65451	4.45082	7.13754	10.7782	19.7372	6.90462	8.92507	4.80197	7.3954	6.40741	13.0593	3.76438	9.02898	38.7784	44.4052	63.4833	94.2697	50.7539	60.277	6.72939	12.1743	15.305	18.0428	15.9168	6.85333	Pita_unigene2481
Pita_unigene755	0	0.558358	0.616148	0.258206	0	0.00805183	0	0	1.99558	1.27	0.962832	0.907648	0	1.93671	3.37894	4.08704	1.61013	0.00239845	0	0	0.548755	0	0	0	1.4059	0	0.198248	0.695603	0.533955	2.56053	3.15501	0	1.34954	0	0.391542	3.55414	1.74949	0	0	0	1.45777	2.47457	1.43567	1.56282	1.10625	2.56493	2.07913	2.057	Pita_unigene755
Pita_unigene5707	2.46801	2.0193	1.21979	1.19337	2.10596	1.22826	1.48004	1.28867	1.37543	0.965013	1.47193	1.56928	1.40536	1.05455	1.71008	2.17677	1.37041	1.90847	0.215347	0.852516	1.53096	1.7036	2.43839	1.46739	0	1.19724	0.892039	0.540955	0.556632	1.03831	0.459519	0.402936	0.420367	0.361401	0.552797	0.466029	2.25759	1.54166	3.22771	0.365308	2.76953	2.1333	0.978452	0.936035	1.30019	0.990678	3.22735	0.90528	Pita_unigene5707
Pita_unigene42137	2.30202	4.3367	7.36093	3.05832	4.31876	3.16087	1.45628	3.07828	3.33347	1.94218	4.36646	2.75789	2.89295	4.51586	5.02118	4.07929	3.14864	2.2464	1.14397	2.71394	2.23889	3.21608	1.15576	1.38238	0.401832	1.58395	2.59832	1.9737	1.21451	3.16184	0.497695	0.4941	0.876574	1.11632	0.487902	0.824762	1.48696	2.39069	2.51261	2.62598	1.42046	3.22494	1.24605	1.71943	1.59702	3.71418	1.0272	1.36817	Pita_unigene42137
Pita_unigene40730	1.54292	2.1978	3.67221	2.66007	2.37073	3.08106	1.97942	2.6521	1.57119	1.69183	1.52368	1.99028	1.93664	3.03568	2.17266	1.74603	3.3926	2.28265	1.53407	3.94027	0.604722	1.10569	1.66755	1.73265	0.495747	1.20066	2.06453	0.685683	0.771047	1.53688	0.0992188	0	0.753357	0.573066	0.207285	0.286228	1.15848	3.48204	6.90732	2.11584	1.54903	4.3284	1.24677	1.51354	2.96539	2.8031	1.30122	2.79409	Pita_unigene40730
Pita_unigene62418	10.2182	4.11525	1.60056	8.98747	1.74219	15.8007	1.67692	0.828141	2.04486	3.89942	0.601354	5.62956	4.06464	0.767018	2.41631	1.56077	6.78329	3.69378	15.2845	5.08078	7.78417	7.81221	11.6987	21.3561	0.163825	1.48073	0.160514	0.144318	0.506154	4.30139	0.198139	0.35684	0	0.139383	0.353825	0.645445	1.72953	5.8093	0.364672	7.22742	4.0886	21.596	8.28875	14.1181	2.22872	33.4987	12.9451	34.9604	Pita_unigene62418
Pita_unigene24111	1.47873	2.33875	2.28582	2.43977	3.3912	3.78059	1.99781	0.617561	2.50653	2.63858	1.64821	3.40798	3.301	2.4858	3.23858	3.51701	3.83145	2.90462	4.50785	3.14153	4.92258	4.55462	1.96183	6.07307	1.3832	0.793233	0.799249	0.308735	0.489297	1.22835	0.385159	0.128524	0.543686	0.0596288	0.485302	0.402331	0.871504	2.15334	1.7376	1.9122	2.06523	6.10095	1.84899	1.39478	7.14039	6.63427	3.50974	7.92263	Pita_unigene24111
Pita_unigene21014	8.45808	14.762	8.96955	7.83679	11.2999	14.161	1.92031	4.80072	6.1796	5.28724	2.74718	6.08813	5.8455	5.43932	8.203	7.19456	7.67334	4.15352	19.6228	24.0894	26.8081	28.3668	9.05458	21.6259	1.98032	1.3075	1.62026	0.349129	1.34688	5.35168	0.726091	0.299035	0.29359	0.337194	0.0848546	0.73317	8.44265	5.06031	14.0455	8.3745	9.98953	24.381	23.7537	14.1954	38.2427	32.7633	21.6046	37.1966	Pita_unigene21014
Pita_unigene63165	5.02372	3.83659	2.83996	2.97103	0.98906	2.044	3.36957	3.16663	3.85935	5.46746	0.706464	2.30107	3.06638	3.37583	3.24774	1.08142	1.4386	4.47117	2.56519	3.54933	2.36316	0.558826	2.93203	2.16688	6.5848	6.80032	2.99466	25.629	6.226	16.8675	8.20286	7.3027	4.99205	18.646	8.17564	11.7554	14.3519	8.53138	6.11065	27.0453	11.1129	13.3191	4.91416	5.002	4.52628	6.74387	8.36098	3.59489	Pita_unigene63165
Pita_unigene57862	0.202875	0	0	0.108811	0	0.153363	0.10726	0.588859	0.151893	0.300645	0.400563	0	0.257169	0.182614	0.51796	0	0.293117	0.434282	0.303958	0.106511	0	0.13728	0.121878	0.0910712	0.584255	0.855113	0	1.38607	0.253049	1.20635	0.770039	1.19784	0.311278	1.90218	0.365812	0.84991	0.499613	0.958262	0.206442	1.61854	0.650128	0.63777	0.538285	0.692539	0.376328	0.48647	1.02849	0.615399	Pita_unigene57862
Pita_unigene61645	0.19649	0	0.979069	0	0.292255	0.290395	0	0.868792	0	0.112023	0.313372	0	0	1.48677	0	0.430135	0	0	0	1.07787	0	0.422438	0	0.0514509	1.02472	0.487659	0	5.16488	0.184964	0	3.90271	2.78319	0.193404	11.5087	4.40522	0.163556	0.261651	0.393216	0	2.58043	0.757691	0	0	0	0.0584425	0	1.10602	0.274793	Pita_unigene61645
Pita_unigene8684	0.580627	0.257873	0.346231	0.245057	0.431934	0.299326	0.348804	0.188797	0.241246	0.517214	0.148254	0.0314061	0.364203	0.119194	0.491533	0.181909	0	0.144164	0.199786	0.0340908	0.143113	0.163315	0.432838	0	2.94894	1.68636	0.610407	21.2084	3.47991	0.789178	8.56197	6.08071	0.850867	50.3377	17.7114	1.96218	2.04617	0.520922	0.636914	1.30128	2.0713	0.326656	0.112323	0.417774	0.204325	0.0822346	1.6103	0.0547034	Pita_unigene8684
Pita_unigene6859	0.11488	0.0969158	0.897319	0.201444	0.504824	0.295492	0.348158	0.605559	0.515558	0.489111	0.807193	0.0519015	0.0925009	0.14514	1.95089	0.954507	0.165014	0.394099	0.0902509	0.281398	0.0717236	0.0927476	0.150759	0	3.64668	0.83031	0.503782	2.96192	0.321202	0.620211	5.66763	2.37581	1.89856	2.52838	1.23896	1.06514	2.67924	2.29124	2.08778	1.09833	0.196371	0.755854	0.0975713	0.376204	0.0958443	0.064055	0.252288	0.0594802	Pita_unigene6859
Pita_unigene57289	0.0379161	0.288872	0.272125	0.0461238	0.0889647	0.0368714	0	0.328585	0.155335	0.0717692	0	0	0.0819506	0.132441	0.158376	0	0.0568234	0	0.0940168	0.227582	0	0.0364459	0.170567	0	1.0678	0.0389072	0.075939	2.28957	1.13138	0.652834	2.27886	0.391282	0.462308	6.36083	4.92058	2.16363	0.456597	0.041121	0.118183	0.301092	0.669316	0.0651889	0.135379	0	0.0757046	0	0.266147	0.0658904	Pita_unigene57289
Pita_unigene5546	1.53207	2.54681	2.55399	3.80335	5.74959	4.82088	2.26046	2.05591	3.20898	3.40539	2.27353	2.79123	3.65428	2.37431	6.35467	2.52614	3.84947	3.28888	1.83421	1.73874	3.29158	2.60198	1.49789	2.78593	8.88917	4.49735	1.00783	23.9975	8.71981	4.19121	12.5436	6.70136	1.98721	19.2715	10.9164	5.82843	7.16539	4.25006	1.51045	15.0544	9.75602	3.91256	1.9244	1.69096	0.379618	3.30057	5.48661	2.71163	Pita_unigene5546
Pita_unigene42599	2.19967	3.99661	4.03508	4.56935	9.96659	6.01517	3.47295	3.42383	4.17395	3.46955	5.48702	3.54221	3.95008	2.72573	9.74646	6.89184	3.66131	4.54569	2.88574	2.99478	4.05628	4.99231	3.91505	3.87593	16.611	8.05463	2.62923	35.7695	13.8566	6.15997	17.8525	14.8422	5.92314	29.496	19.1588	12.8845	15.6087	9.84142	4.08346	20.347	18.2259	6.44481	4.40111	3.89566	2.27686	3.92663	7.22326	4.07865	Pita_unigene42599
Pita_unigene2135	10.8113	5.66424	8.09322	2.86023	15.1663	4.15148	12.1113	7.43489	5.30974	3.36666	13.3201	4.76493	3.5564	5.86518	7.34316	11.7698	2.41885	12.7144	2.51992	5.03343	4.02187	9.62306	10.1862	3.68715	28.0209	23.5984	13.4189	38.0517	19.9321	8.54266	28.7901	39.3289	20.0207	35.9911	38.1996	22.6192	13.6439	15.784	10.4512	12.0183	10.8239	4.22824	4.74715	7.29765	4.63524	3.60054	6.73356	4.5848	Pita_unigene2135
Pita_unigene31375	4.08636	3.58102	0.716239	1.81923	1.45764	2.28837	1.92163	0.48168	2.07136	1.84419	1.40946	1.58647	1.57163	0.168933	0.696876	0.383525	0.482874	0.901478	2.16389	0	1.44524	1.23935	1.85151	2.36928	0.430716	0.725874	0.714725	0.288267	1.44215	0.457321	0	0.50182	0.106354	0.742044	0.186416	0.45007	0.276882	0.110109	0.587602	0.829583	0.45066	0.465063	0.465482	0.7599	1.34839	2.39272	2.91483	2.43118	Pita_unigene31375
Pita_unigene43001	6.97649	5.62091	9.01339	8.89648	9.30281	8.42466	11.908	2.32252	2.69623	6.50719	7.96243	7.06468	7.59537	1.43111	6.97836	8.71274	3.38692	13.2261	1.8276	1.56949	2.47592	2.13635	3.05015	1.29759	4.77911	1.63613	5.58433	2.74622	1.90507	1.64876	6.53786	1.42768	2.14741	0.969068	1.78902	1.71765	3.39499	2.53559	5.79685	0.999795	1.18471	1.12733	1.98824	0.621322	3.52565	0.330568	2.24133	1.13922	Pita_unigene43001
Pita_unigene43577	128.662	97.884	106.206	90.4849	71.1867	73.3242	199.764	170.757	142.504	184.426	148.009	140.629	174.733	167.258	96.6473	138.047	129.488	225.636	120.262	151.02	81.3431	103.424	115.863	81.6894	21.2339	50.7098	54.007	5.35011	29.7621	47.9844	26.9328	21.429	46.483	14.908	33.4168	47.4536	57.3626	83.407	78.1606	24.9032	31.6772	91.6823	110.791	142.454	96.4784	87.8736	50.1132	99.2357	Pita_unigene43577
Pita_unigene60041	1.0366	0.540711	0.681046	0.512122	0.291982	2.9593	1.39754	0.929671	2.89401	7.4806	7.66513	3.27443	4.55285	0.598978	1.59526	1.94601	2.39827	2.02922	0.274721	1.89057	0.918088	0.720193	2.02671	0.902091	24.2841	1.56798	2.85211	159.547	45.1814	6.52843	87.2362	32.42	20.2214	315.192	128.696	59.0226	73.7993	7.33152	48.6619	44.2121	40.9978	11.1205	0.189021	0	0.877787	0.876185	6.9271	0.137792	Pita_unigene60041
Pita_unigene57330	2.55129	0.108633	0	0.263954	0	0.193545	0.0691811	0.147658	0.270667	0.279151	0.184001	0.0386287	0.293501	0.0662967	0.407635	0.250942	0.336664	0.139975	0	0.442083	0.0347444	0.143995	0.0691949	0.195034	2.02173	0.0795403	0.0677481	0.688011	0.0650471	0.518274	4.83648	0.0803373	0.120976	0.210447	0	0.170436	9.09609	1.43785	2.54992	1.20885	0.142848	0.728983	1.53567	0.36259	0.14378	0.193322	1.33589	0.341794	Pita_unigene57330
Pita_unigene2917	1.55035	1.9463	1.91635	0.840555	2.57967	1.6464	1.17551	1.93158	1.12139	1.69501	1.85284	1.6614	1.12851	1.30317	1.33878	1.83394	0.967277	0.965342	1.18748	1.02889	1.31645	1.91848	0.88367	1.5144	5.46941	6.12527	4.04314	6.65141	2.27362	6.31976	3.60547	3.89285	4.43353	6.2578	3.21188	4.37394	3.52871	3.42406	3.2315	6.30498	3.2695	2.56818	2.85917	1.68535	2.05498	1.50111	1.46541	1.7606	Pita_unigene2917
Pita_unigene46898	3.58499	5.61218	3.74637	2.1397	1.8053	2.24657	6.91919	7.05901	11.993	7.04669	7.43302	7.32375	4.9954	5.75373	6.74195	7.62146	4.77212	5.34162	6.21794	4.32786	8.37782	5.3741	8.26606	5.1234	8.11264	14.5858	8.50486	10.2342	6.60749	4.98569	14.5461	32.1223	22.4598	14.429	12.8976	14.9868	26.5076	31.4472	27.496	14.9663	13.4167	15.2728	12.6058	16.6158	12.2542	10.6963	6.56892	4.92057	Pita_unigene46898
Pita_unigene64007	0.139357	0.24295	0.0961262	0.0937235	0.228068	0.0685433	0.0329142	0	0.185764	0.00646633	0.339026	0.0355695	0.0758721	0	0.324959	0.0811261	0	0	0	0	0	0.12473	0	0	0.0772389	0	0.0443532	0.0692242	0.737964	0.0979689	0.51032	0.0718361	0.151679	0.47518	0.752002	0.256422	1.19302	0.27752	0.203544	0.268285	0.281125	0.605082	0.0333579	0	0.343969	0	1.19975	0.0324725	Pita_unigene64007
Pita_unigene41302	14.1383	7.36731	7.32795	5.42511	6.09619	5.90796	10.046	10.5946	4.74513	7.94308	10.6215	4.61251	5.73768	11.3388	3.31202	9.7393	8.99388	11.2439	4.06921	5.56735	4.96477	9.22752	9.51206	5.37022	6.5272	6.32502	5.2892	1.35063	7.42036	1.80971	8.60873	4.53178	4.21229	0.651701	2.88856	1.52936	4.02607	5.11869	8.4216	2.5739	4.95832	2.2186	5.9084	4.83985	2.99344	2.51151	6.28795	2.40355	Pita_unigene41302
Pita_unigene55491	27.4177	18.3851	24.5402	14.0552	0	5.40425	9.97989	7.45948	11.2715	8.20127	0	0.757728	5.99183	6.093	7.11784	0	1.30766	8.03739	7.3194	3.81724	17.7555	0	27.5497	3.1386	1.99208	9.17978	0	0	4.09934	0	0.968739	5.23183	0	0	1.31152	0	0	2.47109	0	0	0.531005	0	0.193015	2.42598	0	0	6.32863	0	Pita_unigene55491
Pita_unigene24038	34.4117	12.1466	15.1006	11.5055	7.92451	29.9463	4.22538	9.12121	4.74418	4.26466	4.15889	38.4079	7.02877	7.94576	8.00799	7.02242	20.9294	5.58503	4.60538	10.026	4.27793	6.38356	5.6832	22.4897	39.1952	94.0739	12.9369	44.8278	21.5165	155.899	25.7847	64.5232	11.3548	25.2872	17.5925	23.0277	16.9899	31.5099	17.2365	24.6551	9.81101	29.983	8.50377	6.45783	5.05379	9.54306	3.06881	8.00682	Pita_unigene24038
Pita_unigene5856	19.3546	30.0428	37.4201	25.6526	30.5613	34.9705	16.3673	17.8096	19.7378	20.0655	28.7293	15.5136	19.5727	17.9244	24.1193	20.3979	14.1443	19.0493	15.5835	11.7856	14.5451	15.0896	10.7157	9.14632	16.5213	21.7901	17.0149	1.21512	10.6445	14.3459	5.63142	5.46089	7.6314	0.25151	4.75405	4.28214	10.901	14.3988	15.177	3.57806	4.91173	13.5757	16.3034	11.9425	8.84822	8.19952	15.4883	13.0028	Pita_unigene5856
Pita_unigene55965	14.8405	16.5922	19.948	10.4102	20.8144	16.7636	12.2622	15.0395	13.9582	7.18965	13.3128	9.60779	6.37711	6.40582	27.4052	7.21214	4.97082	10.0336	3.01601	5.19841	6.29764	4.75381	2.84306	3.59623	82.172	49.7745	27.3484	124.947	44.6862	32.9542	153.101	99.3647	44.7241	96.2267	98.7976	72.7173	17.7779	21.8041	12.6972	15.3775	12.1826	9.69393	3.89154	5.47571	6.49901	3.05471	4.951	4.21557	Pita_unigene55965
Pita_unigene16736	8.54231	7.47639	10.6237	5.77454	10.7308	7.65481	4.57435	7.64768	6.23907	2.94779	9.41476	5.50827	2.46699	2.93624	13.7039	6.37466	0.872574	6.25212	2.11787	2.17113	3.08918	3.34353	2.71087	2.07715	43.1676	25.9481	12.9244	45.286	22.3668	11.9943	64.2709	55.5151	25.7468	43.9072	56.5104	33.1857	11.72	12.4756	6.80119	6.61308	5.83597	4.47171	3.64253	3.18871	3.82422	1.75533	2.45347	1.90191	Pita_unigene16736
[truncated: 120 more columns]

## Sheet: Anotation
target_id	ID	p	short_description	Curator_summary	Computational_description
Pita_unigene4288	AT5G65280	3.89e-146	GCR2-like 1	Encodes a protein with reported similarity to GCR2 a putative G protein coupled receptor thought to be an ABA receptor. Loss of function mutations in GCL1 show no ABA response defects based on assays of seed germination and seedling development.GCL1 also has similarity to LANCL1 and LANCL2, human homologs of bacterial lanthionine synthetase.	GCR2-like 1 (GCL1); FUNCTIONS IN: catalytic activity; INVOLVED IN: response to salt stress; LOCATED IN: extrinsic to membrane; EXPRESSED IN: 23 plant structures; EXPRESSED DURING: 13 growth stages; CONTAINS InterPro DOMAIN/s: LanC-like protein, eukaryotic (InterPro:IPR020464), Six-hairpin glycosidase-like (InterPro:IPR008928), Lanthionine synthetase C-like (InterPro:IPR007822); BEST Arabidopsis t…
Pita_unigene57214	AT5G59220	1.7e-87	highly ABA-induced PP2C gene 1	Encodes a member of the PP2C family (Clade A protein phosphatases type 2C). Functions as a negative regulator of osmotic stress and ABA signaling.	highly ABA-induced PP2C gene 1 (HAI1); FUNCTIONS IN: protein serine/threonine phosphatase activity, catalytic activity; INVOLVED IN: response to water deprivation, response to abscisic acid stimulus; LOCATED IN: chloroplast; EXPRESSED IN: 18 plant structures; EXPRESSED DURING: 11 growth stages; CONTAINS InterPro DOMAIN/s: Protein phosphatase 2C-related (InterPro:IPR001932), Protein phosphatase 2C…
Pita_unigene8323	AT5G50720	3.49e-42	HVA22 homologue E	Encodes one of five HVA22 homologs in Arabidopsis. HVA22 is an ABA- and stress-inducible gene first isolated from barley. Members of this gene family have only been found in eukaryotes. AtHVA22e mRNA is upregulated to varying degrees in response to cold stress, salt stress, ABA treatment or dehydration.	HVA22 homologue E (HVA22E); FUNCTIONS IN: molecular_function unknown; INVOLVED IN: response to water deprivation, response to cold, hyperosmotic salinity response, response to abscisic acid stimulus; LOCATED IN: endomembrane system; EXPRESSED IN: 22 plant structures; EXPRESSED DURING: 12 growth stages; CONTAINS InterPro DOMAIN/s: TB2/DP1/HVA22 related protein (InterPro:IPR004345); BEST Arabidopsi…
Pita_unigene62985	AT5G25610	4.16e-51	BURP domain-containing protein	responsive to dehydration 22 (RD22) mediated by ABA	RESPONSIVE TO DESSICATION 22 (RD22); FUNCTIONS IN: nutrient reservoir activity; INVOLVED IN: response to desiccation, response to salt stress, response to abscisic acid stimulus; LOCATED IN: endomembrane system; EXPRESSED IN: 21 plant structures; EXPRESSED DURING: 13 growth stages; CONTAINS InterPro DOMAIN/s: BURP (InterPro:IPR004873); BEST Arabidopsis thaliana protein match is: unknown seed prot…
Pita_unigene2665	AT4G33950	0	Protein kinase superfamily protein	Encodes calcium-independent ABA-activated protein kinase, a member of SNF1-related protein kinases (SnRK2) whose activity is activated by ionic (salt) and non-ionic (mannitol) osmotic stress. Mutations disrupted ABA induction of stomatal closure as well as ABA inhibition of light-induced stomatal opening. However, regulation of stomatal opening/closing by light or CO(2) is not affected in these m…	OPEN STOMATA 1 (OST1); FUNCTIONS IN: calcium-dependent protein serine/threonine kinase activity, protein kinase activity, kinase activity; INVOLVED IN: in 14 processes; LOCATED IN: cytosol, nucleus, cytoplasm; EXPRESSED IN: 25 plant structures; EXPRESSED DURING: 14 growth stages; CONTAINS InterPro DOMAIN/s: Protein kinase, catalytic domain (InterPro:IPR000719), Serine/threonine-protein kinase dom…
Pita_unigene2481	AT4G19230	3.75e-168	cytochrome P450, family 707, subfamily A, polypeptide 1	Encodes a protein with ABA 8'-hydroxylase activity, involved in ABA catabolism. Member of the CYP707A gene family. CYP707A1 appears to play an important role in determining the ABA levels in dry seeds. Gene involved in postgermination growth. Overexpression of CYP707A1 leads to a decrease in ABA levels and a reduction in after-ripening period to break dormancy.	cytochrome P450, family 707, subfamily A, polypeptide 1 (CYP707A1); FUNCTIONS IN: oxygen binding, (+)-abscisic acid 8'-hydroxylase activity; INVOLVED IN: in 7 processes; LOCATED IN: endomembrane system; EXPRESSED IN: 18 plant structures; EXPRESSED DURING: 10 growth stages; CONTAINS InterPro DOMAIN/s: Cytochrome P450 (InterPro:IPR001128), Cytochrome P450, E-class, group I (InterPro:IPR002401), Cyt…
Pita_unigene755	AT4G18010	1.24e-48	myo-inositol polyphosphate 5-phosphatase 2	Encodes an inositol polyphosphate 5-phosphatase that appears to have Type I activity. It can dephosphorylate IP3(inositol(1,4,5)P3) and IP4 (inositol(1,3,4,5)P4), but it does not appear to be active against phosphatidylinositol 4,5 bisphosphate. Overexpression of this gene renders plants insensitive to ABA in germination and growth assays.	INOSITOL(1,4,5)P3 5-PHOSPHATASE II (IP5PII); CONTAINS InterPro DOMAIN/s: Inositol polyphosphate related phosphatase (InterPro:IPR000300), Endonuclease/exonuclease/phosphatase (InterPro:IPR005135); BEST Arabidopsis thaliana protein match is: DNAse I-like superfamily protein (TAIR:AT1G71710.2); Has 2627 Blast hits to 2054 proteins in 224 species: Archae - 0; Bacteria - 0; Metazoa - 957; Fungi - 640…
Pita_unigene5707	AT4G17870	1.36e-64	Polyketide cyclase/dehydrase and lipid transport superfamily protein	Encodes a member of the PYR (pyrabactin resistance )/PYL(PYR1-like)/RCAR (regulatory components of ABA receptor) family proteins with 14 members. PYR/PYL/RCAR family proteins function as abscisic acid sensors. Mediate ABA-dependent regulation of protein phosphatase 2Cs ABI1 and ABI2.	PYRABACTIN RESISTANCE 1 (PYR1); FUNCTIONS IN: abscisic acid binding; INVOLVED IN: abscisic acid mediated signaling pathway, regulation of protein phosphatase type 2c activity; LOCATED IN: cellular_component unknown; EXPRESSED IN: 25 plant structures; EXPRESSED DURING: 15 growth stages; CONTAINS InterPro DOMAIN/s: Streptomyces cyclase/dehydrase (InterPro:IPR005031); BEST Arabidopsis thaliana prote…
Pita_unigene42137	AT4G17870	1.75e-53	Polyketide cyclase/dehydrase and lipid transport superfamily protein	Encodes a member of the PYR (pyrabactin resistance )/PYL(PYR1-like)/RCAR (regulatory components of ABA receptor) family proteins with 14 members. PYR/PYL/RCAR family proteins function as abscisic acid sensors. Mediate ABA-dependent regulation of protein phosphatase 2Cs ABI1 and ABI2.	PYRABACTIN RESISTANCE 1 (PYR1); FUNCTIONS IN: abscisic acid binding; INVOLVED IN: abscisic acid mediated signaling pathway, regulation of protein phosphatase type 2c activity; LOCATED IN: cellular_component unknown; EXPRESSED IN: 25 plant structures; EXPRESSED DURING: 15 growth stages; CONTAINS InterPro DOMAIN/s: Streptomyces cyclase/dehydrase (InterPro:IPR005031); BEST Arabidopsis thaliana prote…
Pita_unigene40730	AT4G17870	4.37e-64	Polyketide cyclase/dehydrase and lipid transport superfamily protein	Encodes a member of the PYR (pyrabactin resistance )/PYL(PYR1-like)/RCAR (regulatory components of ABA receptor) family proteins with 14 members. PYR/PYL/RCAR family proteins function as abscisic acid sensors. Mediate ABA-dependent regulation of protein phosphatase 2Cs ABI1 and ABI2.	PYRABACTIN RESISTANCE 1 (PYR1); FUNCTIONS IN: abscisic acid binding; INVOLVED IN: abscisic acid mediated signaling pathway, regulation of protein phosphatase type 2c activity; LOCATED IN: cellular_component unknown; EXPRESSED IN: 25 plant structures; EXPRESSED DURING: 15 growth stages; CONTAINS InterPro DOMAIN/s: Streptomyces cyclase/dehydrase (InterPro:IPR005031); BEST Arabidopsis thaliana prote…
Pita_unigene62418	AT4G01026	9.5e-58	PYR1-like 7	Encodes a member of the PYR (pyrabactin resistance )/PYL(PYR1-like)/RCAR (regulatory components of ABA receptor) family proteins with 14 members. PYR/PYL/RCAR family proteins function as abscisic acid sensors. Mediate ABA-dependent regulation of protein phosphatase 2Cs ABI1 and ABI2. PYL/RCAR family proteins function as abscisic acid sensors. Mediate ABA-dependent regulation of ABI1 and ABI2.	PYR1-like 7 (PYL7); CONTAINS InterPro DOMAIN/s: Polyketide cyclase/dehydrase (InterPro:IPR019587); BEST Arabidopsis thaliana protein match is: regulatory component of ABA receptor 1 (TAIR:AT1G01360.1); Has 397 Blast hits to 397 proteins in 30 species: Archae - 0; Bacteria - 5; Metazoa - 2; Fungi - 0; Plants - 390; Viruses - 0; Other Eukaryotes - 0 (source: NCBI BLink).
Pita_unigene24111	AT4G01026	4.34e-59	PYR1-like 7	Encodes a member of the PYR (pyrabactin resistance )/PYL(PYR1-like)/RCAR (regulatory components of ABA receptor) family proteins with 14 members. PYR/PYL/RCAR family proteins function as abscisic acid sensors. Mediate ABA-dependent regulation of protein phosphatase 2Cs ABI1 and ABI2. PYL/RCAR family proteins function as abscisic acid sensors. Mediate ABA-dependent regulation of ABI1 and ABI2.	PYR1-like 7 (PYL7); CONTAINS InterPro DOMAIN/s: Polyketide cyclase/dehydrase (InterPro:IPR019587); BEST Arabidopsis thaliana protein match is: regulatory component of ABA receptor 1 (TAIR:AT1G01360.1); Has 397 Blast hits to 397 proteins in 30 species: Archae - 0; Bacteria - 5; Metazoa - 2; Fungi - 0; Plants - 390; Viruses - 0; Other Eukaryotes - 0 (source: NCBI BLink).
Pita_unigene21014	AT4G01026	1.07e-57	PYR1-like 7	Encodes a member of the PYR (pyrabactin resistance )/PYL(PYR1-like)/RCAR (regulatory components of ABA receptor) family proteins with 14 members. PYR/PYL/RCAR family proteins function as abscisic acid sensors. Mediate ABA-dependent regulation of protein phosphatase 2Cs ABI1 and ABI2. PYL/RCAR family proteins function as abscisic acid sensors. Mediate ABA-dependent regulation of ABI1 and ABI2.	PYR1-like 7 (PYL7); CONTAINS InterPro DOMAIN/s: Polyketide cyclase/dehydrase (InterPro:IPR019587); BEST Arabidopsis thaliana protein match is: regulatory component of ABA receptor 1 (TAIR:AT1G01360.1); Has 397 Blast hits to 397 proteins in 30 species: Archae - 0; Bacteria - 5; Metazoa - 2; Fungi - 0; Plants - 390; Viruses - 0; Other Eukaryotes - 0 (source: NCBI BLink).
Pita_unigene63165	AT3G55610	0	delta 1-pyrroline-5-carboxylate synthase 2	encodes delta 1-pyrroline-5-carboxylate synthetase B. Gene expression is induced by dehydration, high salt and ABA. Knock-out mutations in P5CS2 are embryo-lethal. P5CS2 appears to be present in different cells and/or different subcellular locations from P5CS1 in a tissue-dependent manner. Mutants are defective in pollen development.	delta 1-pyrroline-5-carboxylate synthase 2 (P5CS2); FUNCTIONS IN: oxidoreductase activity, catalytic activity, glutamate 5-kinase activity; INVOLVED IN: hyperosmotic salinity response, proline biosynthetic process, response to abscisic acid stimulus, embryo development ending in seed dormancy; LOCATED IN: chloroplast, cytoplasm; EXPRESSED IN: 16 plant structures; EXPRESSED DURING: L mature pollen…
Pita_unigene57862	AT3G55610	0	delta 1-pyrroline-5-carboxylate synthase 2	encodes delta 1-pyrroline-5-carboxylate synthetase B. Gene expression is induced by dehydration, high salt and ABA. Knock-out mutations in P5CS2 are embryo-lethal. P5CS2 appears to be present in different cells and/or different subcellular locations from P5CS1 in a tissue-dependent manner. Mutants are defective in pollen development.	delta 1-pyrroline-5-carboxylate synthase 2 (P5CS2); FUNCTIONS IN: oxidoreductase activity, catalytic activity, glutamate 5-kinase activity; INVOLVED IN: hyperosmotic salinity response, proline biosynthetic process, response to abscisic acid stimulus, embryo development ending in seed dormancy; LOCATED IN: chloroplast, cytoplasm; EXPRESSED IN: 16 plant structures; EXPRESSED DURING: L mature pollen…
Pita_unigene61645	AT2G33380	2.89e-102	Caleosin-related family protein	Encodes a calcium binding protein whose mRNA is induced upon treatment with NaCl, ABA and in response to dessication. mRNA expression under drought conditions is apparent particularly in leaves and flowers. Isoform of caleosin with a role as a peroxygenase involved in oxylipin metabolism during biotic and abiotic stress.	RESPONSIVE TO DESSICATION 20 (RD20); FUNCTIONS IN: lipoxygenase activity, calcium ion binding; INVOLVED IN: in 7 processes; LOCATED IN: chloroplast membrane, microsome, vacuole; EXPRESSED IN: 21 plant structures; EXPRESSED DURING: 13 growth stages; CONTAINS InterPro DOMAIN/s: Caleosin related (InterPro:IPR007736); BEST Arabidopsis thaliana protein match is: caleosin-related family protein (TAIR:A…
Pita_unigene8684	AT2G29380	4.05e-72	highly ABA-induced PP2C gene 3	0	highly ABA-induced PP2C gene 3 (HAI3); FUNCTIONS IN: protein serine/threonine phosphatase activity, catalytic activity; INVOLVED IN: protein amino acid dephosphorylation; LOCATED IN: protein serine/threonine phosphatase complex; CONTAINS InterPro DOMAIN/s: Protein phosphatase 2C, manganese/magnesium aspartate binding site (InterPro:IPR000222), Protein phosphatase 2C-related (InterPro:IPR001932), …
Pita_unigene6859	AT2G29380	1.8e-62	highly ABA-induced PP2C gene 3	0	highly ABA-induced PP2C gene 3 (HAI3); FUNCTIONS IN: protein serine/threonine phosphatase activity, catalytic activity; INVOLVED IN: protein amino acid dephosphorylation; LOCATED IN: protein serine/threonine phosphatase complex; CONTAINS InterPro DOMAIN/s: Protein phosphatase 2C, manganese/magnesium aspartate binding site (InterPro:IPR000222), Protein phosphatase 2C-related (InterPro:IPR001932), …
Pita_unigene57289	AT2G29380	1.47e-72	highly ABA-induced PP2C gene 3	0	highly ABA-induced PP2C gene 3 (HAI3); FUNCTIONS IN: protein serine/threonine phosphatase activity, catalytic activity; INVOLVED IN: protein amino acid dephosphorylation; LOCATED IN: protein serine/threonine phosphatase complex; CONTAINS InterPro DOMAIN/s: Protein phosphatase 2C, manganese/magnesium aspartate binding site (InterPro:IPR000222), Protein phosphatase 2C-related (InterPro:IPR001932), …
Pita_unigene5546	AT2G29380	1.94e-89	highly ABA-induced PP2C gene 3	0	highly ABA-induced PP2C gene 3 (HAI3); FUNCTIONS IN: protein serine/threonine phosphatase activity, catalytic activity; INVOLVED IN: protein amino acid dephosphorylation; LOCATED IN: protein serine/threonine phosphatase complex; CONTAINS InterPro DOMAIN/s: Protein phosphatase 2C, manganese/magnesium aspartate binding site (InterPro:IPR000222), Protein phosphatase 2C-related (InterPro:IPR001932), …
Pita_unigene42599	AT2G29380	1.76e-73	highly ABA-induced PP2C gene 3	0	highly ABA-induced PP2C gene 3 (HAI3); FUNCTIONS IN: protein serine/threonine phosphatase activity, catalytic activity; INVOLVED IN: protein amino acid dephosphorylation; LOCATED IN: protein serine/threonine phosphatase complex; CONTAINS InterPro DOMAIN/s: Protein phosphatase 2C, manganese/magnesium aspartate binding site (InterPro:IPR000222), Protein phosphatase 2C-related (InterPro:IPR001932), …
Pita_unigene2135	AT2G29380	5.01e-84	highly ABA-induced PP2C gene 3	0	highly ABA-induced PP2C gene 3 (HAI3); FUNCTIONS IN: protein serine/threonine phosphatase activity, catalytic activity; INVOLVED IN: protein amino acid dephosphorylation; LOCATED IN: protein serine/threonine phosphatase complex; CONTAINS InterPro DOMAIN/s: Protein phosphatase 2C, manganese/magnesium aspartate binding site (InterPro:IPR000222), Protein phosphatase 2C-related (InterPro:IPR001932), …
Pita_unigene31375	AT1G69850	1.04e-62	nitrate transporter 1:2	Encodes an inducible component of low-affinity nitrate uptake. mRNA found primarily in root hairs and the epidermis of roots. It also acts as an ABA importer at the site of ABA biosynthesis and is important for the regulation of stomatal aperture in inflorescence stems.	nitrate transporter 1:2 (NRT1:2); FUNCTIONS IN: transporter activity, calcium ion binding; INVOLVED IN: response to nematode; LOCATED IN: plasma membrane, membrane; EXPRESSED IN: 22 plant structures; EXPRESSED DURING: 13 growth stages; CONTAINS InterPro DOMAIN/s: Oligopeptide transporter (InterPro:IPR000109), Major facilitator superfamily, general substrate transporter (InterPro:IPR016196); BEST …
Pita_unigene43001	AT1G18100	7.9e-79	PEBP (phosphatidylethanolamine-binding protein) family protein	Encodes a member of the FT and TFL1 family of phosphatidylethanolamine-binding proteins. It is expressed in seeds and up-regulated in response to ABA. Loss of function mutants show decreased rate of germination in the presence of ABA. ABA dependent regulation is mediated by both ABI3 and ABI5. ABI5 promotes MFT expression, primarily in the radicle-hypocotyl transition zone and ABI3 suppresses it …	E12A11; CONTAINS InterPro DOMAIN/s: Phosphatidylethanolamine-binding, conserved site (InterPro:IPR001858), Phosphatidylethanolamine-binding protein PEBP (InterPro:IPR008914); BEST Arabidopsis thaliana protein match is: PEBP (phosphatidylethanolamine-binding protein) family protein (TAIR:AT5G03840.1); Has 2417 Blast hits to 2417 proteins in 371 species: Archae - 0; Bacteria - 118; Metazoa - 639; F…
Pita_unigene43577	AT1G12480	1.52e-163	C4-dicarboxylate transporter/malic acid transport protein	Encodes a membrane protein with 10 predicted transmembrane helices. SLAC1 is a multispanning membrane protein expressed predominantly in guard cells that plays a role in regulating cellular ion homeostasis and S-type anion currents. SLAC1 is important for normal stomatal closure in response to a variety of signals including elevated CO2, ozone, ABA, darkness, and humidity. SLAC1:GFP localizes to …	OZONE-SENSITIVE 1 (OZS1); CONTAINS InterPro DOMAIN/s: C4-dicarboxylate transporter/malic acid transport protein (InterPro:IPR004695); BEST Arabidopsis thaliana protein match is: SLAC1 homologue 3 (TAIR:AT5G24030.1); Has 903 Blast hits to 900 proteins in 365 species: Archae - 17; Bacteria - 650; Metazoa - 0; Fungi - 31; Plants - 165; Viruses - 0; Other Eukaryotes - 40 (source: NCBI BLink).
Pita_unigene60041	AT1G01720	6.09e-83	NAC (No Apical Meristem) domain transcriptional regulator superfamily protein	Belongs to a large family of putative transcriptional activators with NAC domain. Transcript level increases in response to wounding and abscisic acid. ATAF1 attentuates ABA signaling and sythesis. Mutants are hyposensitive to ABA.	ATAF1; CONTAINS InterPro DOMAIN/s: No apical meristem (NAM) protein (InterPro:IPR003441); BEST Arabidopsis thaliana protein match is: NAC domain containing protein 32 (TAIR:AT1G77450.1); Has 3043 Blast hits to 3037 proteins in 75 species: Archae - 0; Bacteria - 0; Metazoa - 0; Fungi - 0; Plants - 3043; Viruses - 0; Other Eukaryotes - 0 (source: NCBI BLink).
Pita_unigene57330	AT1G01720	1.97e-77	NAC (No Apical Meristem) domain transcriptional regulator superfamily protein	Belongs to a large family of putative transcriptional activators with NAC domain. Transcript level increases in response to wounding and abscisic acid. ATAF1 attentuates ABA signaling and sythesis. Mutants are hyposensitive to ABA.	ATAF1; CONTAINS InterPro DOMAIN/s: No apical meristem (NAM) protein (InterPro:IPR003441); BEST Arabidopsis thaliana protein match is: NAC domain containing protein 32 (TAIR:AT1G77450.1); Has 3043 Blast hits to 3037 proteins in 75 species: Archae - 0; Bacteria - 0; Metazoa - 0; Fungi - 0; Plants - 3043; Viruses - 0; Other Eukaryotes - 0 (source: NCBI BLink).
Pita_unigene2917	AT4G33150	0	lysine-ketoglutarate reductase/saccharopine dehydrogenase bifunctional enzyme	Encodes two proteins. One protein is the monofunctional saccharopine dehydrogenase involved in lysine degradation. The longer protein from the same LKR/SDH locus is bifunctional and also has saccharopine dehydrogenase activity. The monofunctional SDH functions mainly to enhance the flux of lysine catabolism. Gene expression is induced by abscisic acid, jasmonate, and under sucrose starvation.	lysine-ketoglutarate reductase/saccharopine dehydrogenase bifunctional enzyme; CONTAINS InterPro DOMAIN/s: Saccharopine dehydrogenase / Homospermidine synthase (InterPro:IPR005097); Has 1125 Blast hits to 1121 proteins in 331 species: Archae - 40; Bacteria - 296; Metazoa - 110; Fungi - 190; Plants - 55; Viruses - 0; Other Eukaryotes - 434 (source: NCBI BLink).
Pita_unigene46898	AT4G22200	0	potassium transport 2/3	Encodes AKT2, a photosynthate- and light-dependent inward rectifying potassium channel with unique gating properties that are regulated by phosphorylation. Expressed in guard cell protoplasts and in the phloem and xylem of aerial portions of the plant. The channel can coassemble with another K+ channel, KAT1, in vitro. In guard cells, AKT2/3 is responsible for the Ca2+ sensitivity of the K+ uptak…	potassium transport 2/3 (KT2/3); FUNCTIONS IN: inward rectifier potassium channel activity, protein binding, cyclic nucleotide binding; INVOLVED IN: regulation of membrane potential, response to abscisic acid stimulus; LOCATED IN: membrane; EXPRESSED IN: 24 plant structures; EXPRESSED DURING: 13 growth stages; CONTAINS InterPro DOMAIN/s: Cyclic nucleotide-binding (InterPro:IPR000595), Potassium c…
Pita_unigene64007	AT4G18350	0	nine-cis-epoxycarotenoid dioxygenase 2	Encodes 9-<i>cis</i>-epoxycarotenoid dioxygenase, a key enzyme in the biosynthesis of abscisic acid. The expression of this gene declines during the first 12h of imbibition.	nine-cis-epoxycarotenoid dioxygenase 2 (NCED2); CONTAINS InterPro DOMAIN/s: Carotenoid oxygenase (InterPro:IPR004294); BEST Arabidopsis thaliana protein match is: nine-cis-epoxycarotenoid dioxygenase 5 (TAIR:AT1G30100.1); Has 1807 Blast hits to 1807 proteins in 277 species: Archae - 0; Bacteria - 0; Metazoa - 736; Fungi - 347; Plants - 385; Viruses - 0; Other Eukaryotes - 339 (source: NCBI BLink).
Pita_unigene41302	AT4G17260	2.96e-60	Lactate/malate dehydrogenase family protein	0	Lactate/malate dehydrogenase family protein; FUNCTIONS IN: in 6 functions; INVOLVED IN: response to salt stress, response to abscisic acid stimulus; LOCATED IN: plasma membrane; EXPRESSED IN: 24 plant structures; EXPRESSED DURING: 13 growth stages; CONTAINS InterPro DOMAIN/s: L-lactate dehydrogenase (InterPro:IPR011304), Lactate/malate dehydrogenase, C-terminal (InterPro:IPR022383), NAD(P)-bindin…
Pita_unigene55491	AT3G24500	5.54e-62	multiprotein bridging factor 1C	One of three genes in A. thaliana encoding multiprotein bridging factor 1, a highly conserved transcriptional coactivator. May serve as a bridging factor between a bZIP factor and TBP. Its expression is specifically elevated in response to pathogen infection, salinity, drought, heat, hydrogen peroxide, and application of abscisic acid or salicylic acid. Constitutive expression enhances the tolera…	multiprotein bridging factor 1C (MBF1C); FUNCTIONS IN: transcription coactivator activity, DNA binding, sequence-specific DNA binding transcription factor activity; INVOLVED IN: in 7 processes; LOCATED IN: nucleolus; EXPRESSED IN: 24 plant structures; EXPRESSED DURING: 14 growth stages; CONTAINS InterPro DOMAIN/s: Multiprotein bridging factor 1, N-terminal (InterPro:IPR013729); BEST Arabidopsis t…
Pita_unigene24038	AT3G22060	4.02e-23	Receptor-like protein kinase-related family protein	contains Pfam profile: PF01657 Domain of unknown function that is usually associated with protein kinase domain Pfam:PF00069, however this protein does not have the protein kinase domain	Receptor-like protein kinase-related family protein; FUNCTIONS IN: molecular_function unknown; INVOLVED IN: response to abscisic acid stimulus; LOCATED IN: cell wall, vacuole; EXPRESSED IN: 17 plant structures; EXPRESSED DURING: 9 growth stages; CONTAINS InterPro DOMAIN/s: Protein of unknown function DUF26 (InterPro:IPR002902); BEST Arabidopsis thaliana protein match is: Domain of unknown functio…
Pita_unigene5856	AT2G22430	3.55e-38	homeobox protein 6	Encodes a homeodomain leucine zipper class I (HD-Zip I) protein that is a target of the protein phosphatase ABI1 and regulates hormone responses in Arabidopsis.	homeobox protein 6 (HB6); FUNCTIONS IN: protein binding, sequence-specific DNA binding, DNA binding, transcription activator activity, sequence-specific DNA binding transcription factor activity; INVOLVED IN: response to water deprivation, positive regulation of transcription, abscisic acid mediated signaling pathway, negative regulation of abscisic acid mediated signaling pathway, regulation of …
Pita_unigene55965	AT1G78390	3.53e-84	nine-cis-epoxycarotenoid dioxygenase 9	Encodes 9-cis-epoxycarotenoid dioxygenase, a key enzyme in the biosynthesis of abscisic acid. The expression of this gene increases during the first 6h of imbibition.	nine-cis-epoxycarotenoid dioxygenase 9 (NCED9); CONTAINS InterPro DOMAIN/s: Carotenoid oxygenase (InterPro:IPR004294); BEST Arabidopsis thaliana protein match is: nine-cis-epoxycarotenoid dioxygenase 3 (TAIR:AT3G14440.1); Has 2892 Blast hits to 2853 proteins in 497 species: Archae - 16; Bacteria - 810; Metazoa - 240; Fungi - 201; Plants - 889; Viruses - 0; Other Eukaryotes - 736 (source: NCBI BLi…
Pita_unigene16736	AT1G78390	0	nine-cis-epoxycarotenoid dioxygenase 9	Encodes 9-cis-epoxycarotenoid dioxygenase, a key enzyme in the biosynthesis of abscisic acid. The expression of this gene increases during the first 6h of imbibition.	nine-cis-epoxycarotenoid dioxygenase 9 (NCED9); CONTAINS InterPro DOMAIN/s: Carotenoid oxygenase (InterPro:IPR004294); BEST Arabidopsis thaliana protein match is: nine-cis-epoxycarotenoid dioxygenase 3 (TAIR:AT3G14440.1); Has 2892 Blast hits to 2853 proteins in 497 species: Archae - 16; Bacteria - 810; Metazoa - 240; Fungi - 201; Plants - 889; Viruses - 0; Other Eukaryotes - 736 (source: NCBI BLi…
