# Supplementary material for: The Transcriptional Landscape and Hub Genes Associated with Physiological Responses to Drought Stress in Pinus tabuliformis
Source: Int J Mol Sci. 2021 Sep 4;22(17):9604. doi: 10.3390/ijms22179604 (PMC8431770; doi:10.3390/ijms22179604)
Supplement: Supplementary file 1 [file ijms-22-09604-s001.zip › S3 Transcription factors .xlsx]

## Sheet: Sheet1
Differentially expressed Transcription factors family under drought stress
target_id	ID	p	short_description	Curator_summary	Computational_description					target_id	C1-1	C2-1	C3-1	C4-1	C5-1	C6-1	C1-2	C2-2	C3-2	C4-2	C5-2	C6-2	C1-3	C2-3	C3-3	C4-3	C5-3	C6-3	C1-4	C2-4	C3-4	C4-4	C5-4	C6-4	D1-1	D2-1	D3-1	D4-1	D5-1	D6-1	D1-2	D2-2	D3-2	D4-2	D5-2	D6-2	R1-1	R2-1	R3-1
Pita_unigene60560	AT1G14440	1.09e-49	homeobox protein 31	0	homeobox protein 31 (HB31); FUNCTIONS IN: DNA binding, sequence-specific DNA binding transcription factor activity; INVOLVED IN: regulation of transcription; LOCATED IN: cellular_component unknown; EXPRESSED IN: 17 plant structures; EXPRESSED DURING: 11 growth stages; CONTAINS InterPro DOMAIN/s: Homeobox domain, ZF-HD class (InterPro:IPR006455), ZF-HD homeobox protein, Cys/His-rich dimerisation d…	zf-HD		Transcription Factor		Pita_unigene60560	0.682155	0.127269	0.4378	0	1.18255	0.882588	1.54483	0.107534	0.654996	0.345632	1.27615	0.575317	0.253064	0.184733	0.72467	0.90156	0.619836	1.61581	0.866715	0.0656196	0.349823	0	1.11139	0.454175	0.336236	1.22686	0.411064	0	0.8197	0.206331	0.125893	0.376226	0	0	0.240014	0.160062	0.10074	1.08624	0.608096
Pita_unigene7955	AT1G28360	7.51e-31	ERF domain protein 12	encodes a member of the ERF (ethylene response factor) subfamily B-1 of ERF/AP2 transcription factor family (ERF12). The protein contains one AP2 domain. There are 15 members in this subfamily including ATERF-3, ATERF-4, ATERF-7, and leafy petiole.	ERF domain protein 12 (ERF12); CONTAINS InterPro DOMAIN/s: DNA-binding, integrase-type (InterPro:IPR016177), Pathogenesis-related transcriptional factor/ERF, DNA-binding (InterPro:IPR001471); BEST Arabidopsis thaliana protein match is: ethylene responsive element binding factor 4 (TAIR:AT3G15210.1); Has 5550 Blast hits to 5447 proteins in 245 species: Archae - 0; Bacteria - 0; Metazoa - 1; Fungi …	AP2/ERF-ERF		Transcription Factor		Pita_unigene7955	19.5793	11.0192	20.756	11.3336	12.9561	13.4449	10.5168	6.8395	5.75848	4.76603	11.558	8.05518	6.91533	9.37324	9.12156	11.8906	8.40154	15.4695	2.72434	3.75084	4.25534	3.09759	5.43163	3.21303	4.71951	7.85319	8.07164	2.08168	2.95139	3.5414	1.9092	1.82645	2.28513	0.589595	1.17266	1.58854	2.61815	4.28165	4.87568
Pita_unigene59379	0	0	0	0	0	AP2/ERF-ERF		Transcription Factor		Pita_unigene7805	7.32227	5.95621	3.79443	5.83164	4.01845	5.72589	6.32529	3.47557	5.86279	5.07952	6.76432	4.89377	4.16754	1.25152	3.33249	5.53948	3.41041	4.71951	6.5525	2.5831	4.98676	5.12476	4.52902	6.82064	2.57092	4.58766	4.60105	1.43204	1.0798	4.30517	1.9598	2.81787	2.41614	1.03726	1.08892	2.32803	1.07951	3.50753	5.19737
Pita_unigene57527	AT5G11590	5.02e-44	Integrase-type DNA-binding superfamily protein	encodes a member of the DREB subfamily A-4 of ERF/AP2 transcription factor family. The protein contains one AP2 domain. There are 17 members in this subfamily including TINY.	TINY2 (TINY2); FUNCTIONS IN: DNA binding, sequence-specific DNA binding transcription factor activity; INVOLVED IN: regulation of transcription, DNA-dependent; LOCATED IN: nucleus; EXPRESSED IN: shoot apex, embryo, hypocotyl, leaf; EXPRESSED DURING: LP.10 ten leaves visible, D bilateral stage; CONTAINS InterPro DOMAIN/s: DNA-binding, integrase-type (InterPro:IPR016177), Pathogenesis-related trans…	AP2/ERF-ERF		Transcription Factor		Pita_unigene7540	0.565891	0.698122	1.80912	1.39704	2.69327	0.556951	0.967977	0.32072	0.598816	0.842127	1.19484	0.275182	0.897152	0.443455	1.40498	1.38127	0.204387	0.657229	0.475129	0.211333	0.677159	0.541188	0.360835	0.258047	1.19513	0.540498	0.446597	0.133963	0.0940897	0.37874	0.579486	0.444486	0.43971	0.02588	0.181262	0.123874	0.282542	0.458691	0.299012
Pita_unigene39961	0	0	0	0	0	AP2/ERF-ERF		Transcription Factor		PtMYB22-1	#N/A
Pita_unigene38501	AT1G53170	6.51e-22	ethylene response factor 8	encodes a member of the ERF (ethylene response factor) subfamily B-1 of ERF/AP2 transcription factor family (ATERF-8). The protein contains one AP2 domain. There are 15 members in this subfamily including ATERF-3, ATERF-4, ATERF-7, and leafy petiole.	ethylene response factor 8 (ERF8); CONTAINS InterPro DOMAIN/s: DNA-binding, integrase-type (InterPro:IPR016177), Pathogenesis-related transcriptional factor/ERF, DNA-binding (InterPro:IPR001471); BEST Arabidopsis thaliana protein match is: ethylene responsive element binding factor 4 (TAIR:AT3G15210.1); Has 5970 Blast hits to 5718 proteins in 254 species: Archae - 0; Bacteria - 2; Metazoa - 0; Fu…	AP2/ERF-ERF		Transcription Factor		Pita_unigene6756	1.36583	4.00375	7.07063	4.57373	8.28652	2.14915	2.91163	2.39893	4.057	3.84372	2.10715	1.23495	1.37317	1.11581	5.08283	2.73093	0.655605	3.32398	1.04994	0.804133	1.70628	1.21049	1.5662	1.7662	3.50345	3.09468	3.55546	1.2401	1.83906	1.2805	1.63778	2.53469	2.71913	1.19776	0.974452	1.00564	1.04065	0.752463	1.61332
Pita_unigene36205	AT5G51190	8.4e-29	Integrase-type DNA-binding superfamily protein	encodes a member of the ERF (ethylene response factor) subfamily B-3 of ERF/AP2 transcription factor family. The protein contains one AP2 domain. There are 18 members in this subfamily including ATERF-1, ATERF-2, AND ATERF-5.	Integrase-type DNA-binding superfamily protein; CONTAINS InterPro DOMAIN/s: DNA-binding, integrase-type (InterPro:IPR016177), Pathogenesis-related transcriptional factor/ERF, DNA-binding (InterPro:IPR001471); BEST Arabidopsis thaliana protein match is: ethylene response factor 104 (TAIR:AT5G61600.1); Has 30201 Blast hits to 17322 proteins in 780 species: Archae - 12; Bacteria - 1396; Metazoa - 17…	AP2/ERF-ERF		Transcription Factor		Pita_unigene63386	0.465936	0.824814	1.28572	0.537147	0.459648	0.508728	0.976983	0.56446	1.51751	0.784579	0.599232	1.2151	0.443025	0.807756	0.975836	0.45921	0.65009	0.87027	0.576226	0.305109	1.25165	0.236015	0.197695	0.315359	0.401511	1.26118	0.523843	0.102694	0	0.388527	0.1009	0.320275	0.507726	0.148768	0.198772	0.0954019	0	0.880368	0.156541
Pita_unigene286	AT1G22190	2.5e-29	Integrase-type DNA-binding superfamily protein	The gene encodes a putative transcription factor belongings to the abiotic stress-associated DREB A-6 clade.	Integrase-type DNA-binding superfamily protein; FUNCTIONS IN: DNA binding, sequence-specific DNA binding transcription factor activity; INVOLVED IN: regulation of transcription, DNA-dependent; LOCATED IN: nucleus; EXPRESSED IN: 22 plant structures; EXPRESSED DURING: 13 growth stages; CONTAINS InterPro DOMAIN/s: DNA-binding, integrase-type (InterPro:IPR016177), Pathogenesis-related transcriptional…	AP2/ERF-ERF		Transcription Factor		Pita_unigene63359	4.74779	1.80058	1.18318	0.889378	1.44212	1.08504	1.36053	1.97453	1.87847	2.52372	2.89379	2.53341	1.5733	1.24707	1.62421	1.57005	1.16048	0.861438	1.42116	1.92234	0.256542	2.20862	2.92891	2.23978	1.29044	2.07052	1.38174	2.34418	0.614932	6.08567	4.66867	2.99998	1.73314	3.02885	1.41262	4.73267	4.23249	3.89251	8.46525
Pita_unigene2517	0	0	0	0	0	AP2/ERF-ERF		Transcription Factor		Pita_unigene63030	1.71963	4.19755	2.80638	0.748288	2.41026	1.52592	1.20353	3.40864	1.57657	1.68139	5.83276	1.64145	1.68771	3.12581	2.68809	4.48292	2.22681	1.55312	0.411584	2.83416	0.670476	1.66876	0.847081	1.15846	15.4246	23.3371	18.112	5.22478	7.45313	69.5871	12.8597	25.1666	13.1204	5.25825	8.73084	16.3098	3.32465	4.08708	3.29834
Pita_unigene22373	AT4G17500	9.54e-40	ethylene responsive element binding factor 1	Encodes a member of the ERF (ethylene response factor) subfamily B-3 of ERF/AP2 transcription factor family (ATERF-1). The protein contains one AP2 domain. There are 18 members in this subfamily including ATERF-1, ATERF-2, AND ATERF-5.	ethylene responsive element binding factor 1 (ERF-1); CONTAINS InterPro DOMAIN/s: DNA-binding, integrase-type (InterPro:IPR016177), Pathogenesis-related transcriptional factor/ERF, DNA-binding (InterPro:IPR001471); BEST Arabidopsis thaliana protein match is: ethylene responsive element binding factor 2 (TAIR:AT5G47220.1); Has 5773 Blast hits to 5650 proteins in 248 species: Archae - 0; Bacteria -…	AP2/ERF-ERF		Transcription Factor		Pita_unigene63025	2.30367	1.06514	0.0523216	0.300139	0	0.995225	0.714435	2.83741	2.84655	1.43896	2.31278	7.47608	0.569926	0.992737	1.5191	1.58434	7.11759	0.811053	6.19194	1.37071	1.58081	4.57042	3.97552	18.589	0.587703	0.306277	0.665391	4.47445	10.7851	3.60397	5.18148	0.736153	4.94965	24.0158	25.3713	11.1254	18.9524	2.04337	18.5381
Pita_unigene16442	AT5G25810	7.97e-32	Integrase-type DNA-binding superfamily protein	encodes a member of the DREB subfamily A-4 of ERF/AP2 transcription factor family (TINY). The protein contains one AP2 domain. There are 17 members in this subfamily including TINY. Ectopic or overexpression of this gene in a Ds tagged line has reduced cell expansion. The expression of this gene is induced by ethylene and light and appears to stimulate cytokinin biosynthesis.	TINY (tny); CONTAINS InterPro DOMAIN/s: DNA-binding, integrase-type (InterPro:IPR016177), Pathogenesis-related transcriptional factor/ERF, DNA-binding (InterPro:IPR001471); BEST Arabidopsis thaliana protein match is: Integrase-type DNA-binding superfamily protein (TAIR:AT5G11590.1); Has 1807 Blast hits to 1807 proteins in 277 species: Archae - 0; Bacteria - 0; Metazoa - 736; Fungi - 347; Plants -…	AP2/ERF-ERF		Transcription Factor		Pita_unigene62821	5.6074	12.6734	29.2417	26.3052	18.4079	19.1694	21.0305	16.7236	15.8099	19.8127	25.9125	11.2961	15.0686	18.0457	9.54275	14.0327	14.4207	26.0155	20.6245	7.13455	15.1908	17.2078	25.9341	10.481	11.0757	21.4242	30.0098	1.20938	18.7203	5.67115	6.4646	7.13892	20.399	1.12129	5.33627	7.68048	14.665	24.1594	29.2448
Pita_unigene13251	AT4G23750	8.36e-29	cytokinin response factor 2	encodes a member of the ERF (ethylene response factor) subfamily B-5 of ERF/AP2 transcription factor family. The protein contains one AP2 domain. There are 7 members in this subfamily. Monopteros target gene.	cytokinin response factor 2 (CRF2); CONTAINS InterPro DOMAIN/s: DNA-binding, integrase-type (InterPro:IPR016177), Pathogenesis-related transcriptional factor/ERF, DNA-binding (InterPro:IPR001471); BEST Arabidopsis thaliana protein match is: cytokinin response factor 1 (TAIR:AT4G11140.1); Has 35333 Blast hits to 34131 proteins in 2444 species: Archae - 798; Bacteria - 22429; Metazoa - 974; Fungi -…	AP2/ERF-ERF		Transcription Factor		Pita_unigene62260	10.0921	7.81312	6.83388	8.79711	6.60557	8.30867	6.50098	8.90036	8.69579	8.20304	9.35926	7.11511	11.1644	13.6995	13.2596	12.1049	12.6953	12.2161	7.18591	12.1994	8.238	10.4284	7.19899	6.122	16.0484	10.8782	7.54988	45.7944	16.5904	9.0689	23.0794	28.3811	14.1351	39.3086	24.6725	19.7143	15.952	14.561	12.7791
Pita_unigene13068	AT5G11590	9.41e-23	Integrase-type DNA-binding superfamily protein	encodes a member of the DREB subfamily A-4 of ERF/AP2 transcription factor family. The protein contains one AP2 domain. There are 17 members in this subfamily including TINY.	TINY2 (TINY2); FUNCTIONS IN: DNA binding, sequence-specific DNA binding transcription factor activity; INVOLVED IN: regulation of transcription, DNA-dependent; LOCATED IN: nucleus; EXPRESSED IN: shoot apex, embryo, hypocotyl, leaf; EXPRESSED DURING: LP.10 ten leaves visible, D bilateral stage; CONTAINS InterPro DOMAIN/s: DNA-binding, integrase-type (InterPro:IPR016177), Pathogenesis-related trans…	AP2/ERF-ERF		Transcription Factor		Pita_unigene62171	11.4062	13.4062	13.8019	12.3682	13.3992	9.39122	10.6175	8.36169	12.2416	10.5567	9.54639	10.7205	9.17182	6.6173	10.9582	10.7233	9.32349	10.2046	6.17257	3.52651	8.00937	4.85556	8.15264	5.57426	6.30657	8.97253	10.5969	3.49377	5.91714	8.17771	3.90375	7.22219	5.39563	1.97465	3.08454	3.86858	4.64468	6.17043	7.75446
Pita_unigene38107	AT1G78700	1.91e-29	BES1/BZR1 homolog 4	0	BES1/BZR1 homolog 4 (BEH4); FUNCTIONS IN: transcription regulator activity; INVOLVED IN: biological_process unknown; LOCATED IN: cellular_component unknown; EXPRESSED IN: 23 plant structures; EXPRESSED DURING: 13 growth stages; CONTAINS InterPro DOMAIN/s: BZR1, transcriptional repressor (InterPro:IPR008540); BEST Arabidopsis thaliana protein match is: BES1/BZR1 homolog 3 (TAIR:AT4G18890.1); Has 3…	BES1		Transcription Factor		Pita_unigene62152	2.77726	0.511242	1.8303	0	1.0182	0.881035	1.35305	2.59321	3.1564	1.6733	0.497707	1.31455	0.79665	0	0.419551	0.687772	0.62665	1.61654	0	1.13327e-07	0	0	1.12289	0.539394	0	0.488976	0	0	0	0	0	0	1.29058	2.71568	0	0	0	0.680404	0.947808
Pita_unigene46312	AT4G09820	3.06e-69	basic helix-loop-helix (bHLH) DNA-binding superfamily protein	TT8 is a regulation factor that acts in a concerted action with TT1, PAP1 and TTG1 on the regulation of flavonoid pathways, namely proanthocyanidin and anthocyanin biosynthesis. Affects dihydroflavonol 4-reductase gene expression. It is thought that a ternary complex composed of TT2, TT8 and TTG1 is necessary for correct expression of BAN in seed endothelium. Also important for important for marg…	TRANSPARENT TESTA 8 (TT8); FUNCTIONS IN: DNA binding, sequence-specific DNA binding transcription factor activity; INVOLVED IN: trichome differentiation, regulation of flavonoid biosynthetic process, regulation of proanthocyanidin biosynthetic process; LOCATED IN: nucleus; EXPRESSED IN: stem, hypocotyl, micropylar endosperm; EXPRESSED DURING: C globular stage; CONTAINS InterPro DOMAIN/s: Helix-lo…	bHLH		Transcription Factor		Pita_unigene61697	0	0	2.06938	0.782818	0	0	0	0.812351	0	1.82363	0	0	0.893726	1.70878	0	0	0	0	0.317186	1.15485	0	0	0	0	6.33393	4.23607	4.04084	0	9.26328	5.32032	9.50601	7.63583	4.10712	0	14.7572	6.00219	5.67722	2.45825	3.38187
Pita_unigene32372	AT1G68810	1.11e-49	basic helix-loop-helix (bHLH) DNA-binding superfamily protein	0	basic helix-loop-helix (bHLH) DNA-binding superfamily protein; FUNCTIONS IN: DNA binding, sequence-specific DNA binding transcription factor activity; INVOLVED IN: regulation of transcription; LOCATED IN: nucleus; EXPRESSED IN: 20 plant structures; EXPRESSED DURING: 12 growth stages; CONTAINS InterPro DOMAIN/s: Helix-loop-helix DNA-binding domain (InterPro:IPR001092), Helix-loop-helix DNA-binding…	bHLH		Transcription Factor		Pita_unigene61274	4.27333	1.45015	6.44176	2.42652	5.57449	2.79395	4.22133	3.74806	0.895994	0.90763	1.90357	1.24997	2.26058	3.19101	0.463849	2.92639	2.62361	4.05163	1.43299	5.46355	2.11629	3.52059	4.67607	1.44171	1.35172	0.686358	2.75151	1.64217	5.43787	1.11898	1.20086	0.555868	0.68867	0.637025	4.47177	0.367796	0.609096	0.845766	1.04161
Pita_unigene15442	0	0	0	0	0	bHLH		Transcription Factor		Pita_unigene60666	2.40179	1.81241	2.21972	2.26915	4.87729	2.79549	1.38085	1.05391	1.3449	1.19485	1.53671	1.78051	1.96767	1.05671	2.58775	2.57495	1.44519	2.02867	0.839843	0.522136	1.17529	0.642558	0.640309	0.753339	2.60953	1.50869	1.37456	0.779477	1.04094	1.34266	1.45596	1.51063	0.9477	0.391562	0.598739	0	0.949085	0.816154	0.942298
Pita_unigene33923	AT3G30530	5.64e-22	basic leucine-zipper 42	0	basic leucine-zipper 42 (bZIP42); FUNCTIONS IN: DNA binding, protein homodimerization activity, protein heterodimerization activity, sequence-specific DNA binding transcription factor activity; INVOLVED IN: regulation of transcription, DNA-dependent; EXPRESSED IN: inflorescence meristem, flower; EXPRESSED DURING: petal differentiation and expansion stage; CONTAINS InterPro DOMAIN/s: Basic-leucine…	bZIP		Transcription Factor		Pita_unigene60560	0.682155	0.127269	0.4378	0	1.18255	0.882588	1.54483	0.107534	0.654996	0.345632	1.27615	0.575317	0.253064	0.184733	0.72467	0.90156	0.619836	1.61581	0.866715	0.0656196	0.349823	0	1.11139	0.454175	0.336236	1.22686	0.411064	0	0.8197	0.206331	0.125893	0.376226	0	0	0.240014	0.160062	0.10074	1.08624	0.608096
Pita_unigene63386	0	0	0	0	0	C2C2-Dof		Transcription Factor		Pita_unigene60041	1.0366	0.540711	0.681046	0.512122	0.291982	2.9593	1.39754	0.929671	2.89401	7.4806	7.66513	3.27443	4.55285	0.598978	1.59526	1.94601	2.39827	2.02922	0.274721	1.89057	0.918088	0.720193	2.02671	0.902091	24.2841	1.56798	2.85211	159.547	45.1814	6.52843	87.2362	32.42	20.2214	315.192	128.696	59.0226	73.7993	7.33152	48.6619
Pita_unigene6756	AT3G54810	3.25e-33	Plant-specific GATA-type zinc finger transcription factor family protein	Encodes a protein containing a GATA type zinc finger domain that is expressed in the embryo axis and involved in germination. Mutants have a reduced rate of germination even when stratified.	BLUE MICROPYLAR END 3 (BME3); CONTAINS InterPro DOMAIN/s: Zinc finger, NHR/GATA-type (InterPro:IPR013088), Transcription factor, GATA, plant (InterPro:IPR016679), Zinc finger, GATA-type (InterPro:IPR000679); BEST Arabidopsis thaliana protein match is: GATA transcription factor 11 (TAIR:AT1G08010.2); Has 1480 Blast hits to 1450 proteins in 168 species: Archae - 0; Bacteria - 0; Metazoa - 58; Fungi…	C2C2-GATA		Transcription Factor		Pita_unigene59967	2.97345	1.17933	0.893443	0	0.763358	0.582218	0.279572	0.482193	1.05202	2.13733	1.42684	1.48954	3.41303	0	3.06219	2.86482	2.20769	0.45776	0	1.08891	0.516304	2.93681	0.990041	0.419949	5.167	1.48611	1.43012	14.1814	11.4104	1.63004	17.1625	5.57986	4.32988	42.214	13.8231	2.94613	34.0781	4.40646	36.524
Pita_unigene39956	AT1G08465	8.87e-54	Plant-specific transcription factor YABBY family protein	Member of the YABBY family of Arabidopsis proteins involved in the abaxial cell fate specification in lateral organs	YABBY2 (YAB2); CONTAINS InterPro DOMAIN/s: High mobility group, superfamily (InterPro:IPR009071), YABBY protein (InterPro:IPR006780); BEST Arabidopsis thaliana protein match is: plant-specific transcription factor YABBY family protein (TAIR:AT2G26580.2); Has 446 Blast hits to 444 proteins in 124 species: Archae - 0; Bacteria - 0; Metazoa - 0; Fungi - 2; Plants - 433; Viruses - 0; Other Eukaryotes…	C2C2-YABBY		Transcription Factor		Pita_unigene59825	4.04751	5.32492	0.213899	0.36396	0.590797	0.178408	4.47396	0.323523	2.97368	0.196329	0.470268	0.205666	0.265279	0.0397728	4.46679	0.503805	0.105246	3.22096	0.353136	0.089598	4.24206	0.250773	3.56367	0.239774	0.154463	0.255967	0.404441	0	0	0	0.226245	0.404982	0.350007	0.0860918	0.0942606	0	0.251754	0	0.441502
Pita_unigene58930	AT4G06634	2.78e-63	zinc finger (C2H2 type) family protein	Encodes a C2H2-type zinc finger transcription factor with both tran- scriptional repression and activation domains, that binds a G-rich, 11-bp DNA-binding motif.	zinc finger (C2H2 type) family protein; FUNCTIONS IN: zinc ion binding, nucleic acid binding; INVOLVED IN: biological_process unknown; LOCATED IN: intracellular; CONTAINS InterPro DOMAIN/s: Zinc finger, C2H2-like (InterPro:IPR015880), Zinc finger, C2H2-type (InterPro:IPR007087), Zinc finger, C2H2-type/integrase, DNA-binding (InterPro:IPR013087); BEST Arabidopsis thaliana protein match is: Zinc fi…	C2H2		Transcription Factor		Pita_unigene59379	2.24511	0.8143	2.69417	0.625835	0.229188	0.896413	0.646947	4.3767	3.36772	1.84731	0.743514	6.05743	1.05192	1.21162	1.26869	1.2933	1.12051	1.09169	0.941266	1.44443	0.56437	1.4808	7.53592	5.58549	2.73931	0.686539	4.97919	7.41926	2.56233	11.7692	15.4003	1.42866	11.7859	4.87842	8.1179	15.9836	9.17279	1.28015	24.7213
Pita_unigene39680	0	0	0	0	0	C2H2		Transcription Factor		Pita_unigene58930	14.3102	7.48369	7.063	9.43084	10.784	9.42626	11.893	9.25996	7.93094	12.9056	16.3401	12.9929	9.92873	7.14823	7.80887	13.649	11.7804	13.032	11.3026	5.29896	5.64601	10.8224	10.7782	11.249	0.703824	1.52111	7.04946	1.18467	8.4576	9.12767	1.57337	1.24324	8.71444	1.28222	10.1682	9.27419	0.482917	2.48899	9.17965
Pita_unigene62152	AT3G04030	1.12e-77	Homeodomain-like superfamily protein	0	Homeodomain-like superfamily protein; FUNCTIONS IN: sequence-specific DNA binding transcription factor activity; INVOLVED IN: regulation of transcription; EXPRESSED IN: 9 plant structures; EXPRESSED DURING: 4 anthesis, 4 leaf senescence stage, petal differentiation and expansion stage; CONTAINS InterPro DOMAIN/s: Homeodomain-like (InterPro:IPR009057), Myb, DNA-binding (InterPro:IPR014778), Myb-li…	GARP-G2-like		Transcription Factor		Pita_unigene58680	1.2159	1.09764	4.15868	1.34877	6.1617	2.95226	1.615	0.753505	1.78948	0.647749	2.23483	0.853376	0.614327	1.02057	3.20857	2.62163	1.24513	2.24108	0.141012	1.23029	0.671647	1.52538	1.27092	0.926023	1.17924	0.36154	1.29389	0.566059	0.63006	0.463078	3.56068	0.705136	1.11687	0.473838	0.766382	1.5036	1.73715	1.63778	3.52499
Pita_unigene918	AT5G66770	2.45e-97	GRAS family transcription factor	0	GRAS family transcription factor; CONTAINS InterPro DOMAIN/s: Transcription factor GRAS (InterPro:IPR005202); BEST Arabidopsis thaliana protein match is: GRAS family transcription factor (TAIR:AT3G50650.1); Has 1807 Blast hits to 1807 proteins in 277 species: Archae - 0; Bacteria - 0; Metazoa - 736; Fungi - 347; Plants - 385; Viruses - 0; Other Eukaryotes - 339 (source: NCBI BLink).	GRAS		Transcription Factor		Pita_unigene58579	0.22682	3.61508	7.82301	3.45035	1.00309	5.65145	5.53455	5.62255	4.16542	2.90003	5.79553	3.55052	3.55935	5.40439	5.0601	2.45925	4.22483	9.98077	2.10442	1.70619	1.68817	1.03475	4.98564	2.56651	3.60353	2.03825	0.730639	0.0750918	0.956779	0.141759	5.57228	2.33848	2.09887	0.0725286	0.181545	0.34789	5.50906	3.98789	5.41309
Pita_unigene44994	AT3G54220	1.1e-60	GRAS family transcription factor	Encodes a member of a novel family having similarity to DNA binding proteins containing basic-leucine zipper regions; scr is expressed in cortex/endodermal initial cells and in the endodermal cell lineage. Regulates the radial organization of the root. Is required cell-autonomously for distal specification of the quiescent center, which in turn regulates stem cell fate of immediately surrounding …	SCARECROW (SCR); CONTAINS InterPro DOMAIN/s: Transcription factor GRAS (InterPro:IPR005202); BEST Arabidopsis thaliana protein match is: GRAS family transcription factor (TAIR:AT5G41920.1); Has 4362 Blast hits to 4213 proteins in 491 species: Archae - 0; Bacteria - 22; Metazoa - 838; Fungi - 368; Plants - 2661; Viruses - 19; Other Eukaryotes - 454 (source: NCBI BLink).	GRAS		Transcription Factor		Pita_unigene58563	0.412221	0.310432	0.943229	0.185739	0.43383	0.226194	0.35564	0.967271	0.435377	0.715276	1.41159	0.630853	0.647505	0.384495	0.543044	0.54885	1.16207	0.662021	0.28414	0.529195	0.18351	0.324358	0.303826	0.908807	1.46237	0.671329	0.390034	1.51481	0.479306	0.976149	5.14411	0.714509	1.27973	1.38585	0.898092	0.955008	6.55362	1.54337	1.60175
Pita_unigene18890	0	0	0	0	0	GRAS		Transcription Factor		Pita_unigene58299	37.2481	25.6577	30.8157	23.3351	20.596	22.1983	20.2239	20.6531	20.4034	19.571	18.8564	20.4439	21.6557	16.8024	15.3639	19.6946	17.0991	19.3461	18.9889	15.2668	18.3365	18.4511	20.0627	21.0522	10.4996	16.6589	18.3463	5.54681	10.2974	27.304	2.6336	3.83905	6.17664	4.16397	2.44629	9.65507	32.181	38.64	52.5584
Pita_unigene1868	AT3G54220	1.24e-129	GRAS family transcription factor	Encodes a member of a novel family having similarity to DNA binding proteins containing basic-leucine zipper regions; scr is expressed in cortex/endodermal initial cells and in the endodermal cell lineage. Regulates the radial organization of the root. Is required cell-autonomously for distal specification of the quiescent center, which in turn regulates stem cell fate of immediately surrounding …	SCARECROW (SCR); CONTAINS InterPro DOMAIN/s: Transcription factor GRAS (InterPro:IPR005202); BEST Arabidopsis thaliana protein match is: GRAS family transcription factor (TAIR:AT5G41920.1); Has 4362 Blast hits to 4213 proteins in 491 species: Archae - 0; Bacteria - 22; Metazoa - 838; Fungi - 368; Plants - 2661; Viruses - 19; Other Eukaryotes - 454 (source: NCBI BLink).	GRAS		Transcription Factor		Pita_unigene57917	0.461502	1.06895	0.741248	0.452786	0.984142	0.750011	1.70439	0.853046	1.00061	0.298721	0.795118	0.344428	0.975633	0.960091	0.679443	1.24151	1.13949	1.39645	0.0549631	0.353958	0.704253	0.207642	0.656443	0.252938	0.646281	0.52927	0.332814	0.259352	0.171226	0.906424	0.743546	0.32511	0.455673	0.671031	0.295243	0.499553	0.696068	0.670789	0
Pita_unigene18305	0	0	0	0	0	GRAS		Transcription Factor		Pita_unigene57527	0.382238	1.22617	0.264339	1.31836	3.14766	0.493715	1.26038	0.456266	3.07626	1.17936	2.25105	1.57401	0.858738	0.38788	3.11162	1.95844	0.79238	1.90302	0.550851	0.058182	0.535342	0.766272	0.827328	0.469861	0.335764	1.47651	0.436146	0.330332	0.31825	0.0988168	0.105103	1.05139	0.290344	0.385631	1.19133	0.482081	0.43151	2.25651	0.404438
Pita_unigene61697	AT1G69780	3.32e-39	Homeobox-leucine zipper protein family	Encodes a homeodomain leucine zipper class I (HD-Zip I) protein.	ATHB13; FUNCTIONS IN: sequence-specific DNA binding, DNA binding, sequence-specific DNA binding transcription factor activity; INVOLVED IN: cotyledon morphogenesis, regulation of transcription, DNA-dependent, response to sucrose stimulus, leaf morphogenesis; LOCATED IN: nucleus; EXPRESSED IN: 22 plant structures; EXPRESSED DURING: 13 growth stages; CONTAINS InterPro DOMAIN/s: Homeobox, conserved …	HB-HD-ZIP		Transcription Factor		Pita_unigene57520	0.30646	0.300622	0.141958	1.12495	1.16244	0.321873	0.712388	0.841583	0.665665	1.74085	2.02973	0.736151	2.52028	0.664542	0.338253	2.32163	3.42351	1.35346	0.979469	0.338403	0	0.638559	0.218615	0.90592	0.0535963	0.0502125	0.0382268	0	0.0467569	0.0656652	0.267514	0	0	0.0336109	0.0733845	0.217451	0.036439	0	0.0435309
Pita_unigene5856	AT2G22430	3.55e-38	homeobox protein 6	Encodes a homeodomain leucine zipper class I (HD-Zip I) protein that is a target of the protein phosphatase ABI1 and regulates hormone responses in Arabidopsis.	homeobox protein 6 (HB6); FUNCTIONS IN: protein binding, sequence-specific DNA binding, DNA binding, transcription activator activity, sequence-specific DNA binding transcription factor activity; INVOLVED IN: response to water deprivation, positive regulation of transcription, abscisic acid mediated signaling pathway, negative regulation of abscisic acid mediated signaling pathway, regulation of …	HB-HD-ZIP		Transcription Factor		Pita_unigene57330	2.55129	0.108633	0	0.263954	0	0.193545	0.0691811	0.147658	0.270667	0.279151	0.184001	0.0386287	0.293501	0.0662967	0.407635	0.250942	0.336664	0.139975	0	0.442083	0.0347444	0.143995	0.0691949	0.195034	2.02173	0.0795403	0.0677481	0.688011	0.0650471	0.518274	4.83648	0.0803373	0.120976	0.210447	0	0.170436	9.09609	1.43785	2.54992
Pita_unigene55924	AT5G06710	4.53e-40	homeobox from Arabidopsis thaliana	Homeobox-leucine zipper protein.	homeobox from Arabidopsis thaliana (HAT14); FUNCTIONS IN: DNA binding, sequence-specific DNA binding transcription factor activity; INVOLVED IN: regulation of transcription, DNA-dependent; LOCATED IN: nucleus; EXPRESSED IN: 18 plant structures; EXPRESSED DURING: 9 growth stages; BEST Arabidopsis thaliana protein match is: Homeobox-leucine zipper protein 4 (HB-4) / HD-ZIP protein (TAIR:AT4G17460.1…	HB-HD-ZIP		Transcription Factor		Pita_unigene55924	5.13494	12.7242	7.03255	6.74944	7.55307	8.57513	9.52513	10.1215	15.2014	12.9164	5.00872	13.9714	12.8017	9.74443	13.7203	9.10913	10.0637	11.9242	8.83671	5.60655	12.5714	6.96902	4.68243	9.63123	4.42423	5.38216	3.56813	6.9001	4.18123	4.06877	4.50064	8.76559	5.16217	6.33593	7.55579	5.94315	6.18703	4.20344	3.33479
Pita_unigene43862	AT1G69780	1.62e-38	Homeobox-leucine zipper protein family	Encodes a homeodomain leucine zipper class I (HD-Zip I) protein.	ATHB13; FUNCTIONS IN: sequence-specific DNA binding, DNA binding, sequence-specific DNA binding transcription factor activity; INVOLVED IN: cotyledon morphogenesis, regulation of transcription, DNA-dependent, response to sucrose stimulus, leaf morphogenesis; LOCATED IN: nucleus; EXPRESSED IN: 22 plant structures; EXPRESSED DURING: 13 growth stages; CONTAINS InterPro DOMAIN/s: Homeobox, conserved …	HB-HD-ZIP		Transcription Factor		Pita_unigene55649	13.6202	22.0045	17.6164	9.85224	9.45447	18.2922	13.1341	14.2826	17.2094	17.2429	11.4124	32.8168	13.9449	10.8966	28.5714	3.69742	4.38392	10.8165	19.6783	8.38142	36.9613	9.29578	17.2597	17.5043	5.51579e-07	7.67269	0.924602	3.51149	2.31712	3.5843	18.1354	0.0663664	4.92866	0	7.22888	2.641	8.34178	3.72633	9.29098e-06
Pita_unigene3134	AT5G60690	0	Homeobox-leucine zipper family protein / lipid-binding START domain-containing protein	REVOLUTA regulates meristem initiation at lateral positions. a member of a small homeodomain-leucine zipper family. Has overlapping functions with PHAVOLUTA and PHABULOSA.	REVOLUTA (REV); CONTAINS InterPro DOMAIN/s: Homeobox (InterPro:IPR001356), Homeodomain-like (InterPro:IPR009057), Lipid-binding START (InterPro:IPR002913), MEKHLA (InterPro:IPR013978), Homeodomain-related (InterPro:IPR012287); BEST Arabidopsis thaliana protein match is: Homeobox-leucine zipper family protein / lipid-binding START domain-containing protein (TAIR:AT2G34710.1); Has 1807 Blast hits t…	HB-HD-ZIP		Transcription Factor		Pita_unigene53237	9.25483	4.08173	4.89644	1.92813	4.66923	5.47315	8.53332	5.45647	8.13545	6.21601	9.97273	7.23619	5.29323	4.66446	4.89273	7.13392	1.75781	7.64964	2.78104	5.54439	2.60022	2.73803	7.69774	4.10439	13.3197	7.78402	5.03613	25.3458	15.2374	4.81581	27.9811	31.2603	13.0089	33.7565	24.1568	22.6737	11.7536	4.28415	10.4631
PtWOX4	AT1G46480	8.81e-35	WUSCHEL related homeobox 4	Encodes a WUSCHEL-related homeobox gene family member with 65 amino acids in its homeodomain. Proteins in this family contain a sequence of eight residues (TLPLFPMH) downstream of the homeodomain called the WUS box. This protein also contains an acidic domain approximately 10 residues upstream of the WUS box. Part of the TDIF-TDR-WOX4 signaling pathway that plays a crucial role in the maintenance…	WUSCHEL related homeobox 4 (WOX4); CONTAINS InterPro DOMAIN/s: Homeobox (InterPro:IPR001356), Homeodomain-like (InterPro:IPR009057); BEST Arabidopsis thaliana protein match is: WUSCHEL related homeobox 1 (TAIR:AT3G18010.1); Has 537 Blast hits to 535 proteins in 47 species: Archae - 0; Bacteria - 0; Metazoa - 0; Fungi - 0; Plants - 537; Viruses - 0; Other Eukaryotes - 0 (source: NCBI BLink).	HB-WOX		Transcription Factor		PtWOX4
Pita_unigene42725	AT1G46264	4.53e-52	heat shock transcription factor B4	Encodes SCHIZORIZA, a member of Heat Shock Transcription Factor (Hsf) family. Functions as a nuclear factor regulating asymmetry of stem cell divisions.	heat shock transcription factor B4 (HSFB4); FUNCTIONS IN: DNA binding, sequence-specific DNA binding transcription factor activity; INVOLVED IN: asymmetric cell division; LOCATED IN: nucleus; EXPRESSED IN: 17 plant structures; EXPRESSED DURING: 8 growth stages; CONTAINS InterPro DOMAIN/s: Winged helix-turn-helix transcription repressor DNA-binding (InterPro:IPR011991), Heat shock factor (HSF)-typ…	HSF		Transcription Factor		Pita_unigene47306	2.05196	2.67514	2.46439	1.15443	2.23826	1.74283	1.45295	2.31135	1.37593	1.49563	0.952657	1.39996	1.57561	2.40927	2.73108	1.65319	0.716266	2.65166	1.40527	1.95537	2.68077	2.01055	2.06345	1.51412	4.7161	5.56337	2.57354	9.88873	5.90824	4.66675	5.3123	8.21886	4.08286	7.48029	7.74534	5.43858	3.97129	5.00961	1.97036
Pita_unigene58299	AT3G49940	1.37e-64	LOB domain-containing protein 38	0	LOB domain-containing protein 38 (LBD38); CONTAINS InterPro DOMAIN/s: Lateral organ boundaries, LOB (InterPro:IPR004883); BEST Arabidopsis thaliana protein match is: LOB domain-containing protein 37 (TAIR:AT5G67420.1); Has 581 Blast hits to 580 proteins in 26 species: Archae - 0; Bacteria - 0; Metazoa - 0; Fungi - 0; Plants - 581; Viruses - 0; Other Eukaryotes - 0 (source: NCBI BLink).	LOB		Transcription Factor		Pita_unigene46826	2.95498	4.53469	7.26388	4.14221	1.55965	2.97415	2.55074	3.63432	3.56587	3.55355	1.56936	3.15279	3.12913	2.50757	2.37028	1.38197	3.44761	3.07172	2.0324	1.45642	1.60865	0.875651	3.48934	2.1731	2.78852	2.71663	3.34116	0.422406	0.888505	1.69179	1.7235	1.51762	2.48681	0.270749	0.357448	1.30671	1.30973	1.58579	2.43166
Pita_unigene46337	0	0	0	0	0	LOB		Transcription Factor		Pita_unigene46337	13.2391	20.0334	21.7411	25.3363	26.1169	48.6308	16.7095	11.0667	13.4091	13.7173	16.5427	29.9372	20.9691	13.1148	23.2225	20.9522	38.6271	18.0329	12.1499	9.42048	29.9765	18.2779	18.1963	21.7443	6.92761	6.5428	12.5827	0.597367	4.64121	4.57377	1.37972	2.35911	5.15833	0.157338	1.10387	0.858133	1.71955	2.17297	4.45017
Pita_unigene10537	AT1G68510	1.71e-55	LOB domain-containing protein 42	0	LOB domain-containing protein 42 (LBD42); CONTAINS InterPro DOMAIN/s: Lateral organ boundaries, LOB (InterPro:IPR004883), Asymmetric leaves, AS2/LOB (InterPro:IPR017414); BEST Arabidopsis thaliana protein match is: LOB domain-containing protein 41 (TAIR:AT3G02550.1); Has 393 Blast hits to 393 proteins in 23 species: Archae - 0; Bacteria - 0; Metazoa - 0; Fungi - 4; Plants - 389; Viruses - 0; Othe…	LOB		Transcription Factor		Pita_unigene46312	0.08724	0.328919	0.435272	0.364567	0.181348	0.154385	0.147707	0.0808689	0.0814066	0.261271	0.217778	0.294155	0.111657	0.0575329	0.316776	0.250968	0.266276	0.175172	0.138735	0.0868062	0.0378968	0.168045	0.15019	0.140726	0.0458718	0	0.0291543	0.0207412	0.111861	0.0474716	0	0.0231288	0.0675439	0.0191356	0.0174924	0	0.236039	0.0992893	0.470276
PtMYB22-1	AT4G38620	1.5e-76	myb domain protein 4	Encodes a R2R3 MYB protein which is involved in the response to UV-B. It functions as a repressor of target gene expression. One of its target genes encodes cinnamate 4-hydroxylase; mutants accumulate sinapate esters in their leaves. MYB4 binds to its own promoter and represses its own expression. Nuclear localization of MYB4 depends on the action of the beta importin SAD2.	myb domain protein 4 (MYB4); CONTAINS InterPro DOMAIN/s: SANT, DNA-binding (InterPro:IPR001005), Homeodomain-like (InterPro:IPR009057), Myb, DNA-binding (InterPro:IPR014778), HTH transcriptional regulator, Myb-type, DNA-binding (InterPro:IPR017930), Homeodomain-related (InterPro:IPR012287), Myb transcription factor (InterPro:IPR015495); BEST Arabidopsis thaliana protein match is: myb domain prote…	MYB		Transcription Factor		Pita_unigene45577	1.46181	0.736512	2.40789	2.13139	4.48851	1.15493	1.33736	0.956207	1.29976	1.61239	1.30028	0.557917	1.19209	0.68152	2.49984	1.8528	0.733191	2.02318	0.402581	0.660829	0.792702	0.748278	1.06102	0.433588	1.46099	0.609606	0.488283	0.15989	0.434776	0.571671	0.707542	0.596142	0.646082	0.278021	0.236336	0.398379	1.86943	1.25835	1.02125
Pita_unigene62821	AT1G22640	5.4e-54	myb domain protein 3	MYB-type transcription factor (MYB3) that represses phenylpropanoid biosynthesis gene expression	myb domain protein 3 (MYB3); CONTAINS InterPro DOMAIN/s: SANT, DNA-binding (InterPro:IPR001005), Homeodomain-like (InterPro:IPR009057), Myb, DNA-binding (InterPro:IPR014778), HTH transcriptional regulator, Myb-type, DNA-binding (InterPro:IPR017930), Homeodomain-related (InterPro:IPR012287), Myb transcription factor (InterPro:IPR015495); BEST Arabidopsis thaliana protein match is: myb domain prote…	MYB		Transcription Factor		Pita_unigene44994	2.79648	2.7399	3.24173	1.09639	1.7944	1.11041	2.33309	2.15496	2.37468	1.82481	1.92522	1.53601	1.02833	1.40426	1.90826	2.0617	1.03079	2.0955	0.80694	1.42791	1.13746	1.22299	2.1808	1.26845	1.14658	2.85161	2.6184	0.23373	0.430804	3.64447	1.5167	1.28398	1.09898	0.18062	0.248439	1.70631	3.06948	1.78696	2.44194
Pita_unigene62171	AT2G38090	1.27e-66	Duplicated homeodomain-like superfamily protein	0	Duplicated homeodomain-like superfamily protein; CONTAINS InterPro DOMAIN/s: Molecular chaperone, heat shock protein, Hsp40, DnaJ (InterPro:IPR015609), SANT, eukarya (InterPro:IPR017884), Myb-like DNA-binding domain, SHAQKYF class (InterPro:IPR006447), SANT, DNA-binding (InterPro:IPR001005), Homeodomain-like (InterPro:IPR009057), Myb, DNA-binding (InterPro:IPR014778), Homeodomain-related (InterPr…	MYB		Transcription Factor		Pita_unigene43862	3.33917	5.2891	6.24961	2.80889	8.84985	10.7324	3.69884	5.04422	8.06306	3.09894	11.1748	12.8341	3.32675	5.69877	10.0592	9.07643	11.1761	4.65345	2.4226	4.11176	8.64215	8.28114	4.05244	10.5551	16.1518	9.66925	15.2908	48.0455	17.8537	6.59373	21.3505	18.2334	27.5269	62.2375	29.2094	13.8722	13.2741	7.04313	14.4626
Pita_unigene61274	AT5G35550	1.77e-47	Duplicated homeodomain-like superfamily protein	TT2 encodes a R2R3 MYB domain putative transcription factor that acts as a key determinant in the proanthocyanidin accumulation of developing seed. It is thought that a ternary complex composed of TT2, TT8 and TTG1 is necessary for correct expression of BAN in seed endothelium.	TRANSPARENT TESTA 2 (TT2); CONTAINS InterPro DOMAIN/s: SANT, DNA-binding (InterPro:IPR001005), Homeodomain-like (InterPro:IPR009057), Myb, DNA-binding (InterPro:IPR014778), HTH transcriptional regulator, Myb-type, DNA-binding (InterPro:IPR017930), Homeodomain-related (InterPro:IPR012287), Myb transcription factor (InterPro:IPR015495); BEST Arabidopsis thaliana protein match is: myb domain protein…	MYB		Transcription Factor		PtMYB14
Pita_unigene58680	AT4G38620	1.75e-81	myb domain protein 4	Encodes a R2R3 MYB protein which is involved in the response to UV-B. It functions as a repressor of target gene expression. One of its target genes encodes cinnamate 4-hydroxylase; mutants accumulate sinapate esters in their leaves. MYB4 binds to its own promoter and represses its own expression. Nuclear localization of MYB4 depends on the action of the beta importin SAD2.	myb domain protein 4 (MYB4); CONTAINS InterPro DOMAIN/s: SANT, DNA-binding (InterPro:IPR001005), Homeodomain-like (InterPro:IPR009057), Myb, DNA-binding (InterPro:IPR014778), HTH transcriptional regulator, Myb-type, DNA-binding (InterPro:IPR017930), Homeodomain-related (InterPro:IPR012287), Myb transcription factor (InterPro:IPR015495); BEST Arabidopsis thaliana protein match is: myb domain prote…	MYB		Transcription Factor		Pita_unigene43379	14.0074	2.44877	2.67098	13.2593	6.58111	4.37679	9.10225	5.23026	1.31971	5.84721	8.89383	1.76704	10.1503	4.79481	1.48144	5.85169	1.61727	9.27031	5.81311	5.55388	1.01822	4.29743	5.1383	1.66654	24.5701	8.54297	10.6659	34.9343	15.6118	17.3698	53.9187	31.8074	30.9737	40.7877	69.9645	23.4034	21.0008	10.3531	9.25264
Pita_unigene57520	AT3G02940	8.12e-61	myb domain protein 107	Encodes a putative transcription factor (MYB107).	myb domain protein 107 (MYB107); CONTAINS InterPro DOMAIN/s: SANT, DNA-binding (InterPro:IPR001005), Homeodomain-like (InterPro:IPR009057), Myb, DNA-binding (InterPro:IPR014778), HTH transcriptional regulator, Myb-type, DNA-binding (InterPro:IPR017930), Homeodomain-related (InterPro:IPR012287), Myb transcription factor (InterPro:IPR015495); BEST Arabidopsis thaliana protein match is: myb domain p…	MYB		Transcription Factor		Pita_unigene42725	0.308889	1.15268	0.994586	0.320694	0.690467	0.530339	0.581867	0.152992	0.685433	0.0731612	0.0745354	0.472489	0.440365	0.937856	0.899745	0.380488	1.79791	2.08208	0	0	0	0	0.441503	0.537419	0.0854979	0.0820771	0	0	0.471447	0.145069	0	0.238917	0.0843022	0	0.0740419	0.0713163	0	0.262359	0.466617
Pita_unigene39308	AT4G13480	1.68e-51	myb domain protein 79	Member of the R2R3 factor gene family.	myb domain protein 79 (MYB79); FUNCTIONS IN: DNA binding, sequence-specific DNA binding transcription factor activity; INVOLVED IN: regulation of transcription, DNA-dependent, regulation of transcription; CONTAINS InterPro DOMAIN/s: SANT, DNA-binding (InterPro:IPR001005), Homeodomain-like (InterPro:IPR009057), Myb, DNA-binding (InterPro:IPR014778), HTH transcriptional regulator, Myb-type, DNA-bin…	MYB		Transcription Factor		Pita_unigene42613	19.1575	12.9489	8.00251	8.86647	13.8525	8.64068	13.7487	14.7471	13.8781	9.07805	14.2391	12.8365	8.66679	14.6169	12.0103	13.5601	11.3576	15.4749	10.6414	19.9586	17.3704	18.4955	14.2735	17.5457	31.7274	21.2142	16.2403	46.5457	21.2174	28.4189	39.0442	33.1613	27.1908	55.2169	43.2099	46.5085	24.8264	19.4801	15.9036
Pita_unigene34546	AT3G13540	3.29e-63	myb domain protein 5	Encodes a member of the MYB family of transcriptional regulators. MYB5 act as a negative regulator of trichome branching and play a role in the correct formation of the seed coat and possibly the formation the underlying endosperm layers. Loss of function mutations have defects in seed coat mucilage and columella cells as well as trichome defects (smaller and reduced number of branches).	myb domain protein 5 (MYB5); CONTAINS InterPro DOMAIN/s: SANT, DNA-binding (InterPro:IPR001005), Homeodomain-like (InterPro:IPR009057), Myb, DNA-binding (InterPro:IPR014778), HTH transcriptional regulator, Myb-type, DNA-binding (InterPro:IPR017930), Homeodomain-related (InterPro:IPR012287), Myb transcription factor (InterPro:IPR015495); BEST Arabidopsis thaliana protein match is: myb domain prote…	MYB		Transcription Factor		Pita_unigene42550	0.256989	0	0	0	0.381581	0.315416	0	0.381967	0	0.912894	0.247966	1.17971	3.35914	0.445698	0.345741	0.189943	1.17931	0	0.774491	0.947539	0	1.93193	0	2.62718	0.284621	0.954278	0.118142	0.700068	2.52198	0.0603058	0.187538	4.76988	0.21021	4.17918	0.246537	0.770403	4.58129	2.76639	3.56009
Pita_unigene22049	AT3G02940	5.93e-61	myb domain protein 107	Encodes a putative transcription factor (MYB107).	myb domain protein 107 (MYB107); CONTAINS InterPro DOMAIN/s: SANT, DNA-binding (InterPro:IPR001005), Homeodomain-like (InterPro:IPR009057), Myb, DNA-binding (InterPro:IPR014778), HTH transcriptional regulator, Myb-type, DNA-binding (InterPro:IPR017930), Homeodomain-related (InterPro:IPR012287), Myb transcription factor (InterPro:IPR015495); BEST Arabidopsis thaliana protein match is: myb domain p…	MYB		Transcription Factor		Pita_unigene39961	15.8415	7.61524	13.133	13.763	18.8877	24.4166	14.0028	9.18404	10.6298	6.89183	9.51837	12.1144	13.5959	12.5409	13.3561	13.7783	14.1669	16.2205	4.7953	8.25633	6.00607	10.8917	9.6244	10.1945	56.1004	31.8005	29.4076	46.2031	40.3172	56.9469	39.3991	26.1737	21.1806	34.1153	42.4577	46.8887	23.9491	19.3089	21.4048
Pita_unigene14535	AT3G61250	3.77e-71	myb domain protein 17	LATE MERISTEM IDENTITY2 (LMI2) is a target of the meristem identity regulator LEAFY (LFY). Has a role in the meristem identity transition from vegetative growth to flowering. Member of the R2R3 factor gene family.	myb domain protein 17 (MYB17); CONTAINS InterPro DOMAIN/s: SANT, DNA-binding (InterPro:IPR001005), Homeodomain-like (InterPro:IPR009057), Myb, DNA-binding (InterPro:IPR014778), HTH transcriptional regulator, Myb-type, DNA-binding (InterPro:IPR017930), Homeodomain-related (InterPro:IPR012287), Myb transcription factor (InterPro:IPR015495); BEST Arabidopsis thaliana protein match is: myb domain pro…	MYB		Transcription Factor		Pita_unigene39956	41.3185	37.4942	35.351	23.6401	28.6307	32.5354	35.3871	37.4676	42.3509	28.2051	9.10209	42.246	54.2659	20.5014	58.7987	53.4288	48.674	37.1906	55.4609	25.4827	52.931	48.4992	64.1323	51.3436	10.8902	10.5613	17.5438	1.01873	3.15729	3.62329	2.38336	7.76406	4.15527	0.749624	1.73682	0.585551	3.30424	2.55026	4.9187
Pita_unigene13110	AT4G13480	1.38e-51	myb domain protein 79	Member of the R2R3 factor gene family.	myb domain protein 79 (MYB79); FUNCTIONS IN: DNA binding, sequence-specific DNA binding transcription factor activity; INVOLVED IN: regulation of transcription, DNA-dependent, regulation of transcription; CONTAINS InterPro DOMAIN/s: SANT, DNA-binding (InterPro:IPR001005), Homeodomain-like (InterPro:IPR009057), Myb, DNA-binding (InterPro:IPR014778), HTH transcriptional regulator, Myb-type, DNA-bin…	MYB		Transcription Factor		Pita_unigene39680	0.896198	0	1.82772	1.49535	1.40436	1.18793	1.32483	0.579517	0.900206	5.12052e-09	0.901709	0.994432	1.37112	0.81028	1.38263	1.229	0.896827	1.42244	0.542259	0.34411	0.68874	0.924287	0.167356	0.712206	0.518253	0.453202	0.681339	0.967382	0.748123	0.584494	0.304249	0.522246	0.721183	0.523238	0.336805	0.199891	0.445326	0.618748	0.392903
Pita_unigene11287	AT3G50060	3.58e-55	myb domain protein 77	Encodes a member of the R2R3 transcription factor gene family. Expressed in response to potassium deprivation and auxin. Involved in lateral root development. Interacts with ARF7 and regulates the expression of some auxin responsive genes.	myb domain protein 77 (MYB77); CONTAINS InterPro DOMAIN/s: SANT, DNA-binding (InterPro:IPR001005), Homeodomain-like (InterPro:IPR009057), Myb, DNA-binding (InterPro:IPR014778), HTH transcriptional regulator, Myb-type, DNA-binding (InterPro:IPR017930), Homeodomain-related (InterPro:IPR012287), Myb transcription factor (InterPro:IPR015495); BEST Arabidopsis thaliana protein match is: myb domain pro…	MYB		Transcription Factor		Pita_unigene39308	0.393798	0	0.742394	0.545727	0.0666859	0.201231	0	0.364213	0.172219	1.05654	0.157866	0.296184	0.997387	0.373429	0	0.834651	0.228019	0.181289	0.0759414	0.404181	0.105456	0	0.226123	0.0356224	0.159451	0.606026	0	0.139986	0.274424	1.46834	0.471853	0.63535	0.167872	0.845857	1.14	0.449452	1.33134	0.967572	2.73132
Pita_unigene10229	AT2G37630	1.54e-84	myb-like HTH transcriptional regulator family protein	Encodes a MYB-domain protein involved in specification of the leaf proximodistal axis. Mutation results in lobed and dissected leaves with a characteristic asymmetry. Homologous to the Antirrhinum PHANTASTICA (PHAN) and maize ROUGH SHEATH2 (RS2) genes Asymmetric placement of auxin response at the distal leaf tip precedes visible asymmetric leaf growth. Acts alongside AXR1 to exclude BP expression…	ASYMMETRIC LEAVES 1 (AS1); CONTAINS InterPro DOMAIN/s: SANT, DNA-binding (InterPro:IPR001005), Homeodomain-like (InterPro:IPR009057), Myb, DNA-binding (InterPro:IPR014778), HTH transcriptional regulator, Myb-type, DNA-binding (InterPro:IPR017930), Homeodomain-related (InterPro:IPR012287), Myb transcription factor (InterPro:IPR015495); BEST Arabidopsis thaliana protein match is: myb domain protein…	MYB		Transcription Factor		Pita_unigene38501	3.96757	2.08844	3.22192	1.57679	3.98344	5.71302	0.657722	2.42565	2.06951	2.10223	3.15806	2.37747	3.54761	5.47409	4.69664	3.5649	4.61026	1.61647	0.324327	3.68726	0.324778	2.54625	2.66163	2.43534	19.6228	3.49195	3.74814	61.5513	13.3284	18.5395	52.7589	9.12564	6.89735	115.086	68.5685	28.0747	58.104	12.4048	18.9023
Pita_unigene62260	AT5G47390	3.48e-67	myb-like transcription factor family protein	0	myb-like transcription factor family protein; CONTAINS InterPro DOMAIN/s: SANT, DNA-binding (InterPro:IPR001005), Homeodomain-like (InterPro:IPR009057), Myb, DNA-binding (InterPro:IPR014778), Zinc finger, CCHC-type (InterPro:IPR001878), HTH transcriptional regulator, Myb-type, DNA-binding (InterPro:IPR017930), Myb-like DNA-binding domain, SHAQKYF class (InterPro:IPR006447); BEST Arabidopsis thali…	MYB-related		Transcription Factor		Pita_unigene38107	29.186	15.7816	20.5117	27.3352	29.4624	24.4862	18.0976	23.7806	16.8447	27.3862	37.4331	26.1561	23.0207	37.9042	24.5246	25.7477	32.5519	26.8855	23.9264	20.6735	21.2925	29.1982	22.9533	30.9137	69.8743	43.6656	31.9216	39.9399	61.9909	23.2807	116.388	87.9695	72.7343	85.9887	140.475	97.7716	36.3468	34.0131	37.952
Pita_unigene59825	AT2G38090	1.07e-40	Duplicated homeodomain-like superfamily protein	0	Duplicated homeodomain-like superfamily protein; CONTAINS InterPro DOMAIN/s: Molecular chaperone, heat shock protein, Hsp40, DnaJ (InterPro:IPR015609), SANT, eukarya (InterPro:IPR017884), Myb-like DNA-binding domain, SHAQKYF class (InterPro:IPR006447), SANT, DNA-binding (InterPro:IPR001005), Homeodomain-like (InterPro:IPR009057), Myb, DNA-binding (InterPro:IPR014778), Homeodomain-related (InterPr…	MYB-related		Transcription Factor		Pita_unigene36205	21.8635	16.9982	15.0188	10.7527	12.3635	28.697	5.74293	7.93621	7.63426	5.50043	3.32654	6.26845	10.2116	14.5701	18.2512	3.92965	15.9911	12.8541	12.5023	11.8097	16.1182	9.10936	13.1626	6.65654	30.3696	14.1383	9.08063	8.43208	3.0435	15.1939	2.95496	1.14321	1.33822	3.63751	0.811832	3.13784	7.25636	8.58053	12.428
Pita_unigene58579	AT3G13540	1.2e-51	myb domain protein 5	Encodes a member of the MYB family of transcriptional regulators. MYB5 act as a negative regulator of trichome branching and play a role in the correct formation of the seed coat and possibly the formation the underlying endosperm layers. Loss of function mutations have defects in seed coat mucilage and columella cells as well as trichome defects (smaller and reduced number of branches).	myb domain protein 5 (MYB5); CONTAINS InterPro DOMAIN/s: SANT, DNA-binding (InterPro:IPR001005), Homeodomain-like (InterPro:IPR009057), Myb, DNA-binding (InterPro:IPR014778), HTH transcriptional regulator, Myb-type, DNA-binding (InterPro:IPR017930), Homeodomain-related (InterPro:IPR012287), Myb transcription factor (InterPro:IPR015495); BEST Arabidopsis thaliana protein match is: myb domain prote…	MYB-related		Transcription Factor		Pita_unigene34647	0.125763	0.0908622	0.235601	0.207002	0.261474	0.167213	0	0.107464	0.104811	0.251195	0.104637	0	0.213768	0.0486767	0.275029	0.182057	0	0.431482	0.0834554	0	0.0761817	0.279273	0.147597	0	0	0	0	0.11584	0	0.181167	0.189989	0.143696	0.178926	0.130551	0.0595675	0.0720291	0.197097	0.226757	0.207585
Pita_unigene55649	AT2G38090	1.29e-43	Duplicated homeodomain-like superfamily protein	0	Duplicated homeodomain-like superfamily protein; CONTAINS InterPro DOMAIN/s: Molecular chaperone, heat shock protein, Hsp40, DnaJ (InterPro:IPR015609), SANT, eukarya (InterPro:IPR017884), Myb-like DNA-binding domain, SHAQKYF class (InterPro:IPR006447), SANT, DNA-binding (InterPro:IPR001005), Homeodomain-like (InterPro:IPR009057), Myb, DNA-binding (InterPro:IPR014778), Homeodomain-related (InterPr…	MYB-related		Transcription Factor		Pita_unigene34546	4.84626	6.64601	11.9752	5.39297	4.14106	4.71089	4.29439	9.57137	4.84003	3.41556	0.555505	4.25408	2.81689	6.09808	3.12402	4.07679	1.89985	3.42937	3.43865	17.3099	3.42224	1.06654	4.41518	0.359036	13.2299	5.7155	13.3757	18.327	4.15866	8.42457	9.55109	4.75051	13.2978	18.6651	6.35683	11.4768	11.8182	9.55318	14.9119
Pita_unigene53237	AT1G01060	2.37e-32	Homeodomain-like superfamily protein	LHY encodes a myb-related putative transcription factor involved in circadian rhythm along with another myb transcription factor CCA1	LATE ELONGATED HYPOCOTYL (LHY); FUNCTIONS IN: DNA binding, sequence-specific DNA binding transcription factor activity; INVOLVED IN: in 11 processes; EXPRESSED IN: 22 plant structures; EXPRESSED DURING: 13 growth stages; BEST Arabidopsis thaliana protein match is: circadian clock associated 1 (TAIR:AT2G46830.1).	MYB-related		Transcription Factor		Pita_unigene34156	0	8.68987	64.4068	30.9456	32.3225	26.7891	42.0596	60.3114	15.2261	43.7245	115.895	19.1521	31.0671	40.8431	13.8097	36.9501	7.75621	32.2424	21.7761	22.7017	5.02124	21.3602	23.7637	12.243	26.6295	0.849143	14.567	6.17432	5.49672	8.80768	24.8044	6.34592	14.8093	4.39866	4.45568	14.5792	5.49794	0.827482	27.3612
PtMYB14	AT2G16720	4.95e-26	myb domain protein 7	Encodes a member of MYB3R- and R2R3- type MYB- encoding genes	myb domain protein 7 (MYB7); CONTAINS InterPro DOMAIN/s: SANT, DNA-binding (InterPro:IPR001005), Homeodomain-like (InterPro:IPR009057), Myb, DNA-binding (InterPro:IPR014778), HTH transcriptional regulator, Myb-type, DNA-binding (InterPro:IPR017930), Homeodomain-related (InterPro:IPR012287), Myb transcription factor (InterPro:IPR015495); BEST Arabidopsis thaliana protein match is: myb domain prote…	MYB-related		Transcription Factor		Pita_unigene34094	0.112411	0.111784	0.206915	0.467321	0.225456	0	0	0.556398	0.0996902	0	0.108638	0	0.106799	1.46467	0.20113	0.221558	1.01892	0	0.104151	0.443841	0.312895	0	0.320588	0	0.870598	0.120063	1.03179	0.332619	0.784114	0.211488	1.52273	0.463854	0.738145	0.963088	1.8297	1.04142	0.639224	0.508568	0.452449
Pita_unigene34156	AT4G38620	1.81e-39	myb domain protein 4	Encodes a R2R3 MYB protein which is involved in the response to UV-B. It functions as a repressor of target gene expression. One of its target genes encodes cinnamate 4-hydroxylase; mutants accumulate sinapate esters in their leaves. MYB4 binds to its own promoter and represses its own expression. Nuclear localization of MYB4 depends on the action of the beta importin SAD2.	myb domain protein 4 (MYB4); CONTAINS InterPro DOMAIN/s: SANT, DNA-binding (InterPro:IPR001005), Homeodomain-like (InterPro:IPR009057), Myb, DNA-binding (InterPro:IPR014778), HTH transcriptional regulator, Myb-type, DNA-binding (InterPro:IPR017930), Homeodomain-related (InterPro:IPR012287), Myb transcription factor (InterPro:IPR015495); BEST Arabidopsis thaliana protein match is: myb domain prote…	MYB-related		Transcription Factor		Pita_unigene33923	6.54472	7.42473	8.65819	6.26873	12.0693	12.3237	8.17252	6.88494	3.71895	3.00478	7.50759	7.18987	7.38446	6.92635	7.41393	9.27205	8.53296	6.5322	1.4214	4.23615	2.08828	4.55822	2.91818	3.11272	6.56379	4.90823	4.8822	1.71612	2.31821	4.51922	2.27836	0.843882	1.45379	2.63087	1.27331	2.27185	6.01288	11.3391	9.77735
Pita_unigene15998	AT4G38620	1.06e-27	myb domain protein 4	Encodes a R2R3 MYB protein which is involved in the response to UV-B. It functions as a repressor of target gene expression. One of its target genes encodes cinnamate 4-hydroxylase; mutants accumulate sinapate esters in their leaves. MYB4 binds to its own promoter and represses its own expression. Nuclear localization of MYB4 depends on the action of the beta importin SAD2.	myb domain protein 4 (MYB4); CONTAINS InterPro DOMAIN/s: SANT, DNA-binding (InterPro:IPR001005), Homeodomain-like (InterPro:IPR009057), Myb, DNA-binding (InterPro:IPR014778), HTH transcriptional regulator, Myb-type, DNA-binding (InterPro:IPR017930), Homeodomain-related (InterPro:IPR012287), Myb transcription factor (InterPro:IPR015495); BEST Arabidopsis thaliana protein match is: myb domain prote…	MYB-related		Transcription Factor		Pita_unigene32372	1.13404	1.55047	0.851837	0.793008	2.99721	1.03829	0.37397	0.237975	1.00803	0.749255	1.67778	0.545825	0.652262	0.708102	1.51758	1.58581	0.422355	0.61855	0.465011	0.16788	0.737061	0.457444	0.504517	0.482142	1.17902	0.74907	0.218545	0.266226	0.48345	0.321239	0.850767	0.183506	0.4877	0.886554	0.887021	0.242433	0.980435	0.957713	0.452272
Pita_unigene10824	AT2G38090	2.73e-42	Duplicated homeodomain-like superfamily protein	0	Duplicated homeodomain-like superfamily protein; CONTAINS InterPro DOMAIN/s: Molecular chaperone, heat shock protein, Hsp40, DnaJ (InterPro:IPR015609), SANT, eukarya (InterPro:IPR017884), Myb-like DNA-binding domain, SHAQKYF class (InterPro:IPR006447), SANT, DNA-binding (InterPro:IPR001005), Homeodomain-like (InterPro:IPR009057), Myb, DNA-binding (InterPro:IPR014778), Homeodomain-related (InterPr…	MYB-related		Transcription Factor		Pita_unigene3185	0.125187	0.407082	1.25161	0.286104	2.08389	0.52113	0.280154	0.856603	0.289516	0.554312	0.411031	0.379172	0.460608	0.686866	0.848688	0.906291	0.0974596	0.467539	0.404359	0.233904	0.554041	0.227269	0.263242	0.317402	0.80438	0.543189	0.146198	0.20838	0.243113	0.0746884	0.316622	0.444587	0.123995	0.0404281	0.144242	0	0.537814	0.415249	0
Pita_unigene63030	AT3G04070	2.72e-81	NAC domain containing protein 47	0	NAC domain containing protein 47 (NAC047); FUNCTIONS IN: sequence-specific DNA binding transcription factor activity; INVOLVED IN: multicellular organismal development, regulation of transcription; LOCATED IN: cellular_component unknown; EXPRESSED IN: 16 plant structures; EXPRESSED DURING: 7 growth stages; CONTAINS InterPro DOMAIN/s: No apical meristem (NAM) protein (InterPro:IPR003441); BEST Ara…	NAC		Transcription Factor		Pita_unigene3134	2.01136	2.08655	2.55883	1.9104	5.0081	0.764444	1.79862	1.26994	1.51263	1.66832	1.9368	1.28291	1.48481	1.21316	5.76094	4.10167	1.26482	2.69602	0.855866	0.821343	1.73184	0.462011	0.459148	0.800178	3.18225	1.69641	1.00151	0.90029	1.54146	0.489055	1.13974	1.60041	1.32744	0.737877	0.95289	0.200302	1.10983	1.77188	1.1685
Pita_unigene60041	AT1G01720	6.09e-83	NAC (No Apical Meristem) domain transcriptional regulator superfamily protein	Belongs to a large family of putative transcriptional activators with NAC domain. Transcript level increases in response to wounding and abscisic acid. ATAF1 attentuates ABA signaling and sythesis. Mutants are hyposensitive to ABA.	ATAF1; CONTAINS InterPro DOMAIN/s: No apical meristem (NAM) protein (InterPro:IPR003441); BEST Arabidopsis thaliana protein match is: NAC domain containing protein 32 (TAIR:AT1G77450.1); Has 3043 Blast hits to 3037 proteins in 75 species: Archae - 0; Bacteria - 0; Metazoa - 0; Fungi - 0; Plants - 3043; Viruses - 0; Other Eukaryotes - 0 (source: NCBI BLink).	NAC		Transcription Factor		Pita_unigene29448	9.20704	16.5029	34.2091	17.0972	18.7169	25.7987	15.7517	14.1423	21.5091	27.9516	25.3603	19.6572	30.85	25.3459	25.669	15.6675	20.5875	28.6551	27.7476	15.848	21.3636	15.5585	6.8504	20.6527	4.39397	11.0822	13.6562	3.85258	15.3276	6.72179	2.94298	5.81779	9.63999	3.44778	8.43969	10.7812	16.2345	19.9195	16.5193
Pita_unigene59967	AT1G77450	2.76e-81	NAC domain containing protein 32	0	NAC domain containing protein 32 (NAC032); FUNCTIONS IN: sequence-specific DNA binding transcription factor activity; INVOLVED IN: multicellular organismal development, regulation of transcription; LOCATED IN: cellular_component unknown; EXPRESSED IN: 16 plant structures; EXPRESSED DURING: LP.06 six leaves visible, LP.04 four leaves visible, 4 anthesis, petal differentiation and expansion stage, …	NAC		Transcription Factor		Pita_unigene2867	4.93904	1.54065	1.95716	0.203371	2.77971	0.239596	5.41216	2.83373	2.17047	0.389301	0.324634	1.54079	0.257421	1.44949	0.597688	1.89578	0.783472	2.62129	0.261347	1.38715	0.549346	0.578902	6.1894	1.53864	1.18881	0.687888	0	0.040321	0.797801	0.250849	1.86808	0.209339	0.0867323	0.0389439	0.389985	0	0.132612	0.200618	0
Pita_unigene57330	AT1G01720	1.97e-77	NAC (No Apical Meristem) domain transcriptional regulator superfamily protein	Belongs to a large family of putative transcriptional activators with NAC domain. Transcript level increases in response to wounding and abscisic acid. ATAF1 attentuates ABA signaling and sythesis. Mutants are hyposensitive to ABA.	ATAF1; CONTAINS InterPro DOMAIN/s: No apical meristem (NAM) protein (InterPro:IPR003441); BEST Arabidopsis thaliana protein match is: NAC domain containing protein 32 (TAIR:AT1G77450.1); Has 3043 Blast hits to 3037 proteins in 75 species: Archae - 0; Bacteria - 0; Metazoa - 0; Fungi - 0; Plants - 3043; Viruses - 0; Other Eukaryotes - 0 (source: NCBI BLink).	NAC		Transcription Factor		Pita_unigene2534	10.0599	16.8821	18.152	10.9766	10.7886	15.8926	19.5137	10.7348	14.7157	10.2625	14.3734	12.9592	12.8122	14.707	15.616	10.9306	20.1753	18.6269	7.5943	9.06699	11.5678	10.1068	10.4557	10.8283	4.21375	7.38921	9.84222	2.17185	7.48157	8.77698	2.30274	1.91141	5.34522	3.4544	4.16225	3.92591	6.49888	7.38007	13.4486
Pita_unigene47306	AT1G61110	1.26e-83	NAC domain containing protein 25	0	NAC domain containing protein 25 (NAC025); FUNCTIONS IN: sequence-specific DNA binding transcription factor activity; INVOLVED IN: multicellular organismal development, regulation of transcription; LOCATED IN: cellular_component unknown; EXPRESSED IN: 6 plant structures; EXPRESSED DURING: 4 anthesis, petal differentiation and expansion stage; CONTAINS InterPro DOMAIN/s: No apical meristem (NAM) p…	NAC		Transcription Factor		Pita_unigene2517	0.33109	0.192442	1.2941	0.88687	0.703039	0.244384	0.652005	0.60202	0.392388	0.418058	0.558507	0.309924	0.918569	0.501851	0.71924	0.594128	0.162736	0.465818	0.921735	0.297539	0.487889	0.576445	0.237494	0.288226	1.4072	2.18469	2.32084	1.92015	1.01153	0.336091	2.56189	2.26304	2.16111	3.12656	3.18147	1.52208	1.89345	1.81592	1.41941
Pita_unigene3185	AT4G29230	6.11e-118	NAC domain containing protein 75	0	NAC domain containing protein 75 (NAC075); FUNCTIONS IN: sequence-specific DNA binding transcription factor activity; INVOLVED IN: multicellular organismal development, regulation of transcription; EXPRESSED IN: inflorescence meristem, flower; EXPRESSED DURING: petal differentiation and expansion stage; CONTAINS InterPro DOMAIN/s: No apical meristem (NAM) protein (InterPro:IPR003441); BEST Arabid…	NAC		Transcription Factor		Pita_unigene22373	24.9837	12.3212	6.88549	27.3642	12.1271	17.2617	4.36397	5.56994	4.15789	10.5456	8.0651	9.45148	16.4532	14.1999	15.2406	10.4707	17.9244	15.0395	13.8225	17.1056	5.19648	12.5856	8.87395	10.0637	23.2169	6.4919	12.8949	38.6171	14.3034	15.1296	40.4129	9.1802	13.2591	79.0834	34.134	23.0104	30.064	15.3938	48.0106
Pita_unigene29448	AT2G02450	9.09e-67	NAC domain containing protein 35	0	NAC domain containing protein 35 (NAC035); FUNCTIONS IN: sequence-specific DNA binding transcription factor activity; INVOLVED IN: multicellular organismal development, regulation of transcription; LOCATED IN: cellular_component unknown; EXPRESSED IN: 18 plant structures; EXPRESSED DURING: 12 growth stages; CONTAINS InterPro DOMAIN/s: No apical meristem (NAM) protein (InterPro:IPR003441); BEST Ar…	NAC		Transcription Factor		Pita_unigene22049	1.58853	1.4456	2.17924	0.992855	1.09245	0.641365	2.59149	4.15662	5.79796	1.60732	2.75978	1.19041	2.60521	4.51742	2.36985	2.6724	2.79335	7.66821	0.392725	0.804576	1.42177	1.17727	2.21134	0.801867	0.932735	1.49919	0.167649	0	0.394796	0	0.613851	1.67475	0.520447	0	0.175156	0.0991097	0.359599	2.11259	0.518557
Pita_unigene2534	AT2G02450	4.49e-27	NAC domain containing protein 35	0	NAC domain containing protein 35 (NAC035); FUNCTIONS IN: sequence-specific DNA binding transcription factor activity; INVOLVED IN: multicellular organismal development, regulation of transcription; LOCATED IN: cellular_component unknown; EXPRESSED IN: 18 plant structures; EXPRESSED DURING: 12 growth stages; CONTAINS InterPro DOMAIN/s: No apical meristem (NAM) protein (InterPro:IPR003441); BEST Ar…	NAC		Transcription Factor		Pita_unigene18890	2.57985	2.98756	9.10497	3.58532	5.51272	4.19408	3.61644	3.39921	5.132	3.47245	7.91864	2.62026	3.88012	4.87676	2.68225	9.52942	5.54123	7.42707	0.994468	1.49689	3.58205	1.9484	2.64159	1.86529	3.56067	3.95553	1.9696	0	1.6869	1.6246	0.617838	1.10856	1.89173	0	1.23086	0.200803	3.02908	4.59602	3.0242
Pita_unigene43379	AT1G56170	1.61e-58	nuclear factor Y, subunit C2	Encodes a protein with similarity to a subunit of the CCAAT promoter motif binding complex of yeast.One of two members of this class (HAP5B) and expressed in vegetative and reproductive tissues	nuclear factor Y, subunit C2 (NF-YC2); CONTAINS InterPro DOMAIN/s: Transcription factor CBF/NF-Y/archaeal histone (InterPro:IPR003958), Histone-fold (InterPro:IPR009072); BEST Arabidopsis thaliana protein match is: nuclear factor Y, subunit C9 (TAIR:AT1G08970.2); Has 1485 Blast hits to 1485 proteins in 232 species: Archae - 0; Bacteria - 0; Metazoa - 583; Fungi - 338; Plants - 429; Viruses - 0; O…	NF-YC		Transcription Factor		Pita_unigene1868	0.121123	0.120712	0.87254	0.544126	0.888505	0.715564	0.286386	0.340432	0.340998	0.87935	0.155641	0.371141	0.422506	0.367101	1.14373	0.358204	0.221569	0.682553	0.355987	0.356025	0.263102	0.110607	0.154545	0.210909	0.358201	0.319376	0.0929579	0.0200848	0.0704949	0.151274	0.019749	0.249727	0.15365	0	0.0388091	0.148391	0.0385021	0.36663	0.203684
Pita_unigene34094	AT1G56170	3.04e-29	nuclear factor Y, subunit C2	Encodes a protein with similarity to a subunit of the CCAAT promoter motif binding complex of yeast.One of two members of this class (HAP5B) and expressed in vegetative and reproductive tissues	nuclear factor Y, subunit C2 (NF-YC2); CONTAINS InterPro DOMAIN/s: Transcription factor CBF/NF-Y/archaeal histone (InterPro:IPR003958), Histone-fold (InterPro:IPR009072); BEST Arabidopsis thaliana protein match is: nuclear factor Y, subunit C9 (TAIR:AT1G08970.2); Has 1485 Blast hits to 1485 proteins in 232 species: Archae - 0; Bacteria - 0; Metazoa - 583; Fungi - 338; Plants - 429; Viruses - 0; O…	NF-YC		Transcription Factor		Pita_unigene18305	7.03515	4.23995	10.1751	3.9335	7.24511	4.16638	4.93026	4.71286	8.00192	5.49754	8.7851	7.14053	4.29857	10.5469	9.84032	7.17529	8.44373	9.77328	0.929433	2.00467	3.95486	2.50327	4.49997	1.52628	6.37637	3.27391	3.22414	0.245235	4.38032	1.18778	3.12412	3.10901	2.4768	0.472835	0.718903	1.87958	4.94139	4.5161	6.31328
Pita_unigene18165	AT1G56170	3.2e-59	nuclear factor Y, subunit C2	Encodes a protein with similarity to a subunit of the CCAAT promoter motif binding complex of yeast.One of two members of this class (HAP5B) and expressed in vegetative and reproductive tissues	nuclear factor Y, subunit C2 (NF-YC2); CONTAINS InterPro DOMAIN/s: Transcription factor CBF/NF-Y/archaeal histone (InterPro:IPR003958), Histone-fold (InterPro:IPR009072); BEST Arabidopsis thaliana protein match is: nuclear factor Y, subunit C9 (TAIR:AT1G08970.2); Has 1485 Blast hits to 1485 proteins in 232 species: Archae - 0; Bacteria - 0; Metazoa - 583; Fungi - 338; Plants - 429; Viruses - 0; O…	NF-YC		Transcription Factor		Pita_unigene18165	7.74955	8.98187	7.69911	4.71593	2.86217	11.0402	4.74877	13.7157	2.37162	1.78223	8.13931	4.20234	2.24264	15.8907	5.15679	5.25878	4.79734	7.34511	1.7923	14.3738	2.87382	2.44048	2.87417	1.58393	63.8159	24.537	26.9039	91.21	36.5565	9.44378	148.358	76.2075	69.2927	119.309	159.749	20.8714	56.388	23.8029	22.1493
Pita_unigene7540	AT1G32700	4.92e-71	PLATZ transcription factor family protein	0	PLATZ transcription factor family protein; CONTAINS InterPro DOMAIN/s: Protein of unknown function DUF597 (InterPro:IPR006734); BEST Arabidopsis thaliana protein match is: PLATZ transcription factor family protein (TAIR:AT4G17900.2); Has 35333 Blast hits to 34131 proteins in 2444 species: Archae - 798; Bacteria - 22429; Metazoa - 974; Fungi - 991; Plants - 531; Viruses - 0; Other Eukaryotes - 961…	PLATZ		Transcription Factor		Pita_unigene16442	0.0788623	0.62779	0.362749	0	0.156767	0.077362	0.0742692	0	0.139992	0	0.0761217	0.0804151	0	0.068416	0	0.699416	0	0.146599	0	0	0	0	0.150275	0.0686024	0.785786	0.167678	0.0724676	3.04243	0.343881	0.148158	1.53202	0.731983	0.516604	5.4236	1.96574	0.582733	1.94766	0.803739	0.873585
Pita_unigene42613	AT1G21000	3.39e-76	PLATZ transcription factor family protein	0	PLATZ transcription factor family protein; FUNCTIONS IN: binding; INVOLVED IN: biological_process unknown; EXPRESSED IN: 21 plant structures; EXPRESSED DURING: 10 growth stages; CONTAINS InterPro DOMAIN/s: Protein of unknown function DUF597 (InterPro:IPR006734); BEST Arabidopsis thaliana protein match is: PLATZ transcription factor family protein (TAIR:AT1G76590.1); Has 30201 Blast hits to 17322 …	PLATZ		Transcription Factor		Pita_unigene15998	0.782382	11.1483	47.0497	15.7299	18.3943	21.6941	29.6202	42.456	16.7617	29.4363	62.9344	19.1243	12.8841	39.6765	11.774	25.0593	8.34449	25.9528	12.5638	14.183	5.07997	10.0715	28.2342	9.29676	19.7597	11.867	11.3664	2.95288	2.50141	12.0329	16.8737	9.68699	17.1428	0.247826	1.37251	4.35682	5.18427	10.1697	21.2516
Pita_unigene45577	AT1G02065	4.43e-50	squamosa promoter binding protein-like 8	Encodes an SBP-box gene, a member of the SPL gene family. Mutants are affected in micro- and megasporogenesis, trichome formation on sepals, and stamen filament elongation.	squamosa promoter binding protein-like 8 (SPL8); CONTAINS InterPro DOMAIN/s: Transcription factor, SBP-box (InterPro:IPR004333); BEST Arabidopsis thaliana protein match is: squamosa promoter binding protein-like 2 (TAIR:AT5G43270.1); Has 35333 Blast hits to 34131 proteins in 2444 species: Archae - 798; Bacteria - 22429; Metazoa - 974; Fungi - 991; Plants - 531; Viruses - 0; Other Eukaryotes - 961…	SBP		Transcription Factor		Pita_unigene15442	0	0	0.219318	1.36086	0	0	0	0	0	0.451691	0	0	1.7567	0	0.160428	0	0.0995886	0	0.663334	0	0	0	0	0	0	1.64319	3.56289	0.413507	0.208	0.559372	0.11606	2.08968	2.0796	0	0	0.803895	0.736961	1.68883	1.98206
Pita_unigene34647	AT1G27370	7.6e-42	squamosa promoter binding protein-like 10	In conjunction with SPL11 and SPL2, SPL10 redundantly controls proper development of lateral organs in association with shoot maturation in the reproductive phase. SPL10 also controls lamina shape during vegetative development.	squamosa promoter binding protein-like 10 (SPL10); FUNCTIONS IN: DNA binding, transcription activator activity, sequence-specific DNA binding transcription factor activity; INVOLVED IN: leaf shaping, regulation of transcription, regulation of timing of transition from vegetative to reproductive phase; LOCATED IN: nucleus; EXPRESSED IN: 24 plant structures; EXPRESSED DURING: 13 growth stages; CONT…	SBP		Transcription Factor		Pita_unigene14535	1.48117	0.402071	0.557402	0.419296	1.37144	0.330466	0.444178	0.533652	0.478208	0.573997	0.51974	0.206022	0.127997	0.642264	1.69046	0.796162	0.392891	1.19132	0.374563	1.72152	1.18882	0.736072	0.962979	1.11289	1.64028	0.643127	1.60926	2.53353	1.23325	0.821663	1.50612	1.11079	1.0282	2.69931	2.05862	1.83032	1.34395	1.37302	1.153
Pita_unigene63025	0	0	0	0	0	Tify		Transcription Factor		Pita_unigene14240	25.4443	11.8602	4.78111	7.56782	4.40327	39.2007	4.53944	14.0373	7.96785	12.8143	9.21941	62.8365	21.0376	3.7673	10.9663	9.37903	34.1779	6.17755	8.49519	4.46392	5.77391	26.0655	18.526	82.2676	12.0482	57.3854	16.6644	46.6982	22.9306	38.1924	18.4674	88.3842	31.1618	67.8183	38.6968	23.8685	25.7873	53.1066	43.4983
Pita_unigene57917	0	0	0	0	0	Tify		Transcription Factor		Pita_unigene13251	0.376254	0.4614	0.266179	0.540205	0.539128	0.313299	0.273553	0.459268	0.565946	0.0548181	0.167398	0.147771	0.11012	0.225626	0.546302	0.285293	0.0243781	0.189981	0.214859	0.255395	0.215481	0.158511	0.221426	0.125975	1.05893	1.6809	1.54548	1.06452	0.732635	0.244094	1.66874	4.11762	1.9838	0.889295	1.64076	2.36865	0.110336	0.426935	0.408714
Pita_unigene42550	0	0	0	0	0	Tify		Transcription Factor		Pita_unigene13110	0.727016	0.512242	0.483117	0.293173	0.441201	0	0.298875	0.550071	0.0795885	0.177734	0	0.27907	1.5942	0.598822	0.994924	0.869877	0.377574	0.935458	0	0.929213	0.192472	0.433074	0.424021	0.0688608	0.284323	0	0.364049	0.375347	0.321644	1.84465	0.85651	0.487104	0.742232	1.00349	1.13959	2.36917	3.00793	1.35303	3.02403
Pita_unigene46826	AT5G01380	1.67e-30	Homeodomain-like superfamily protein	0	Homeodomain-like superfamily protein; CONTAINS InterPro DOMAIN/s: SANT, DNA-binding (InterPro:IPR001005), MYB-like (InterPro:IPR017877); BEST Arabidopsis thaliana protein match is: Homeodomain-like superfamily protein (TAIR:AT2G38250.1); Has 1807 Blast hits to 1807 proteins in 277 species: Archae - 0; Bacteria - 0; Metazoa - 736; Fungi - 347; Plants - 385; Viruses - 0; Other Eukaryotes - 339 (sou…	Trihelix		Transcription Factor		Pita_unigene13068	31.8838	32.8791	9.85003	28.0315	20.8783	34.3274	13.9552	2.62308	11.1654	11.1119	1.79922	5.21689	33.3429	9.12792	22.883	9.72294	8.94412	31.8071	48.7038	26.963	40.8235	21.3281	32.0837	20.9373	5.53067	7.90989	5.97456	9.77703	4.30344	4.2907	1.63977	3.84588	2.42689	3.45431	3.63648	0.887519	5.83562	16.6353	12.7903
Pita_unigene7805	AT2G34830	3.52e-49	WRKY DNA-binding protein 35	member of WRKY Transcription Factor; Group II-e	WRKY DNA-binding protein 35 (WRKY35); CONTAINS InterPro DOMAIN/s: DNA-binding WRKY (InterPro:IPR003657), Transcription factor, WRKY group Iie (InterPro:IPR017412); BEST Arabidopsis thaliana protein match is: WRKY DNA-binding protein 14 (TAIR:AT1G30650.1); Has 5047 Blast hits to 3028 proteins in 237 species: Archae - 0; Bacteria - 12; Metazoa - 64; Fungi - 63; Plants - 3289; Viruses - 0; Other Euk…	WRKY		Transcription Factor		Pita_unigene11287	9.87743	5.67571	7.82661	5.41755	10.966	6.33105	2.93227	4.66729	3.67475	3.29289	3.0357	3.75036	4.00331	6.95072	6.47957	5.6987	2.37427	5.36713	3.0175	5.50108	4.42575	4.892	3.89802	3.2964	17.5071	12.3652	8.89031	17.452	17.3089	9.97638	17.377	21.2726	11.2937	9.16947	21.993	13.2729	7.4537	7.81543	3.825
Pita_unigene63359	AT1G69310	2.47e-45	WRKY DNA-binding protein 57	Encodes WRKY57, a member of the WRKY Transcription Factor. Activation of WRKY57 confers drought tolerance.	WRKY DNA-binding protein 57 (WRKY57); CONTAINS InterPro DOMAIN/s: DNA-binding WRKY (InterPro:IPR003657); BEST Arabidopsis thaliana protein match is: WRKY DNA-binding protein 48 (TAIR:AT5G49520.1); Has 35333 Blast hits to 34131 proteins in 2444 species: Archae - 798; Bacteria - 22429; Metazoa - 974; Fungi - 991; Plants - 531; Viruses - 0; Other Eukaryotes - 9610 (source: NCBI BLink).	WRKY		Transcription Factor		Pita_unigene10824	12.9017	17.033	20.017	34.3896	23.1189	28.0733	10.3347	12.8035	12.7155	24.608	16.9969	23.1246	22.0197	14.0422	15.2887	13.9819	31.1754	17.4305	14.0684	6.77215	12.55	11.8742	16.8947	19.0947	16.2831	13.8637	22.7057	8.32321	10.9032	2.27663	10.5697	10.9802	9.69172	6.97483	5.20893	0.713908	10.1841	8.25675	13.5116
Pita_unigene60666	AT2G30590	6.12e-70	WRKY DNA-binding protein 21	Encodes WRKY DNA-binding protein 21 (WRKY21).	WRKY DNA-binding protein 21 (WRKY21); FUNCTIONS IN: calmodulin binding, sequence-specific DNA binding transcription factor activity; INVOLVED IN: regulation of transcription, DNA-dependent, regulation of transcription; LOCATED IN: nucleus; EXPRESSED IN: 22 plant structures; EXPRESSED DURING: 13 growth stages; CONTAINS InterPro DOMAIN/s: DNA-binding WRKY (InterPro:IPR003657), Transcription factor,…	WRKY		Transcription Factor		Pita_unigene10537	13.3275	6.08188	23.5988	0.633844	9.6515	1.63665	5.5526	5.55871	21.3064	6.52235	14.2493	3.85302	9.66191	4.38081	69.6159	14.8313	4.50474	10.0023	2.06012	1.58229	1.34238	3.29046	29.2554	2.46436	1.47644	0.882702	5.7203	4.84494	17.0539	4.11613	4.11082	0.973383	4.60009	1.16974	3.25091	4.40172	10.0902	1.44774	49.8637
Pita_unigene14240	AT1G29860	7.78e-29	WRKY DNA-binding protein 71	member of WRKY Transcription Factor; Group II-c	WRKY DNA-binding protein 71 (WRKY71); FUNCTIONS IN: sequence-specific DNA binding transcription factor activity; INVOLVED IN: regulation of transcription, DNA-dependent, regulation of transcription; EXPRESSED IN: stem; CONTAINS InterPro DOMAIN/s: DNA-binding WRKY (InterPro:IPR003657), Transcription factor, WRKY group IIc (InterPro:IPR017396); BEST Arabidopsis thaliana protein match is: WRKY DNA-b…	WRKY		Transcription Factor		Pita_unigene10229	0.184688	0.181897	0.580638	0.168346	0.93475	0.135945	0.138831	0.0700918	0.0707769	0.0854734	0.0838939	0.0748238	0.0376263	0.247235	0.410035	0.105969	0	0.184215	0	0.0724244	0.163611	0.0270434	0.229839	0.0425511	0	0.152227	0.0900606	0.048708	0	0	0.0479168	0.151082	0.119409	0	0	0	0.0933131	0.124631	0.181927
[truncated: 9 more columns]
