# Supplementary material for: The Transcriptional Landscape and Hub Genes Associated with Physiological Responses to Drought Stress in Pinus tabuliformis
Source: Int J Mol Sci. 2021 Sep 4;22(17):9604. doi: 10.3390/ijms22179604 (PMC8431770; doi:10.3390/ijms22179604)
Supplement: Supplementary file 1 [file ijms-22-09604-s001.zip › S4 Protein kinases .xlsx]

## Sheet: Sheet1
target_id	ID	p	short_description	Curator_summary	Computational_description				Gid	C1-1	C2-1	C3-1	C4-1	C5-1	C6-1	C1-2	C2-2	C3-2	C4-2	C5-2	C6-2	C1-3	C2-3	C3-3	C4-3	C5-3	C6-3	C1-4	C2-4	C3-4	C4-4	C5-4	C6-4	D1-1	D2-1	D3-1	D4-1	D5-1	D6-1	D1-2	D2-2	D3-2	D4-2	D5-2	D6-2	R1-1	R2-1	R3-1	R4-1
Pita_unigene9573	AT3G01490	0	Protein kinase superfamily protein	0	Protein kinase superfamily protein; FUNCTIONS IN: protein serine/threonine/tyrosine kinase activity, kinase activity; INVOLVED IN: protein amino acid phosphorylation; LOCATED IN: cellular_component unknown; EXPRESSED IN: 8 plant structures; EXPRESSED DURING: LP.06 six leaves visible, 4 anthesis, petal differentiation and expansion stage; CONTAINS InterPro DOMAIN/s: Protein kinase, catalytic domai…	TKL-Pl-4	PK		Pita_unigene9573	0.735648	1.60461	0.29437	0.456168	2.39292	0.573024	0.624528	0.0872388	1.03847	0.314623	1.27162	1.38727	0.179605	0.0742622	1.41902	1.58393	0.686925	0.326316	0.656301	0	1.05792	1.64255	0.37914	0.742825	1.31145	0.925747	2.81992	2.6268	1.48846	1.8054	1.24863	1.22216	5.53269	2.07394	2.1238	2.81745	1.67944	2.42262	4.93694	1.38358
Pita_unigene6954	AT5G65600	3.22e-53	Concanavalin A-like lectin protein kinase family protein	0	Concanavalin A-like lectin protein kinase family protein; FUNCTIONS IN: kinase activity; INVOLVED IN: protein amino acid phosphorylation; LOCATED IN: endomembrane system; EXPRESSED IN: stem; CONTAINS InterPro DOMAIN/s: Legume lectin, beta chain (InterPro:IPR001220), Protein kinase, ATP binding site (InterPro:IPR017441), Serine/threonine-protein kinase-like domain (InterPro:IPR017442), Concanavali…	RLK-Pelle_L-LEC	PK		Pita_unigene6954	4.09045	3.96663	1.03522	4.67499	1.94335	0.801542	2.59598	0.708744	2.44906	3.00478	1.08663	1.25041	3.30357	1.33199	5.03415	1.31018	1.18279	2.27207	2.08472	1.00861	3.60703	2.04655	1.45909	0.53361	1.24486	0.763502	1.22055	0.403793	0.534972	1.4423	0.297177	0.527426	1.67745	0	0.391789	0.18932	0.387928	0.347115	1.02919	0.0871913
Pita_unigene6528	AT5G21326	2.48e-173	Ca2+regulated serine-threonine protein kinase family protein	0	Ca2+regulated serine-threonine protein kinase family protein; FUNCTIONS IN: protein serine/threonine kinase activity, protein kinase activity, ATP binding; INVOLVED IN: signal transduction, protein amino acid phosphorylation; CONTAINS InterPro DOMAIN/s: Protein kinase, ATP binding site (InterPro:IPR017441), Serine/threonine-protein kinase domain (InterPro:IPR002290), NAF/FISL domain (InterPro:IPR…	CAMK_CAMKL-CHK1	PK		Pita_unigene6528	6.39478	6.33481	4.40284	8.52172	3.19312	3.3384	8.03223	6.12848	8.31775	10.2517	4.75327	6.82045	10.3632	5.35454	5.10349	3.76782	7.35883	7.76259	10.3749	5.11673	8.17681	3.65104	7.205	8.11607	2.17802	3.66252	2.86074	1.77445	2.55674	3.9181	1.43019	1.95207	2.02209	0.994067	1.16674	4.53611	1.46338	2.55316	1.15287	2.43967
Pita_unigene63539	AT5G55090	2.27e-81	mitogen-activated protein kinase kinase kinase 15	member of MEKK subfamily	mitogen-activated protein kinase kinase kinase 15 (MAPKKK15); FUNCTIONS IN: protein serine/threonine kinase activity, protein kinase activity, kinase activity, ATP binding; INVOLVED IN: protein amino acid phosphorylation; LOCATED IN: cellular_component unknown; CONTAINS InterPro DOMAIN/s: Protein kinase, ATP binding site (InterPro:IPR017441), Protein kinase, catalytic domain (InterPro:IPR000719),…	STE_STE11	PK		Pita_unigene63539	1.58632	1.58023	1.69649	0.95654	1.23237	1.45142	0.801495	0.658442	1.24573	0.663835	2.95227	1.01688	0.280689	0.799066	1.19314	1.09088	1.05423	0.898156	0.51342	0.398129	0.480517	0.572234	0.740429	0.610101	1.10407	1.98883	2.17306	1.75888	2.18939	0.968329	3.06137	3.27094	2.20874	4.31792	3.75604	4.03968	1.22991	2.17606	4.27819	1.03919
Pita_unigene63426	AT5G13290	9.81e-102	Protein kinase superfamily protein	Encodes a protein with predicted Ser/Thr kinase activity and membrane localization that is involved in the CLV3 signaling pathway that represses WUS expression in the meristem. Loss of function of CRN can suppress the phenotype caused by overexpression of CLV3. SOL2 isolated as a suppressor of root- specific overexpression of CLE19, a clavata3 like gene. sol2 partially suppresses the short root p…	CORYNE (CRN); FUNCTIONS IN: protein kinase activity, kinase activity, ATP binding; INVOLVED IN: regulation of meristem growth, regulation of root meristem growth, meristem maintenance, regulation of flower development; LOCATED IN: plasma membrane; EXPRESSED IN: 25 plant structures; EXPRESSED DURING: 11 growth stages; CONTAINS InterPro DOMAIN/s: Protein kinase, catalytic domain (InterPro:IPR000719…	RLK-Pelle_LRR-XI-2	PK		Pita_unigene63426	2.44908	2.36349	3.80157	2.99286	5.70623	2.40958	1.57893	3.13493	2.9082	2.29085	3.37538	2.2211	1.63002	2.58923	2.52386	3.68589	2.71265	2.38541	2.29999	1.69774	2.44249	3.21294	1.70493	2.05974	1.5203	1.73078	1.34256	0.686811	1.0073	0.717723	0.695071	1.36537	1.46498	0.494772	0.788234	0.659563	1.0123	1.53837	2.17117	0.475698
Pita_unigene62241	AT3G25560	0	NSP-interacting kinase 2	0	NSP-interacting kinase 2 (NIK2); FUNCTIONS IN: protein serine/threonine kinase activity, protein kinase activity, ATP binding; INVOLVED IN: protein amino acid phosphorylation; LOCATED IN: endomembrane system; EXPRESSED IN: 18 plant structures; EXPRESSED DURING: 13 growth stages; CONTAINS InterPro DOMAIN/s: Protein kinase, ATP binding site (InterPro:IPR017441), Serine/threonine-protein kinase doma…	RLK-Pelle_LRR-II	PK		Pita_unigene62241	4.87759	5.00678	5.05237	5.7696	7.71757	5.13087	2.95613	3.77791	2.46728	3.03442	4.33346	3.30311	4.52161	3.16534	3.82358	4.83999	3.91811	4.28276	3.99886	3.09382	2.37501	4.06742	3.77379	3.58352	3.68929	2.61229	4.44141	0.726775	2.08523	2.64909	2.36588	1.75101	3.43817	0.206263	1.17037	2.09611	1.16864	2.30773	3.98462	0.172526
Pita_unigene61775	AT1G51170	3.87e-94	Protein kinase superfamily protein	Encodes an active AGC VIII protein kinase that interacts with the putative transcription factor ATS and regulates planar growth during integument development in the ovule. Mutants exhibit ectopic growth in filaments and petals, as well as aberrant embryogenesis.	Protein kinase superfamily protein; FUNCTIONS IN: kinase activity; INVOLVED IN: protein amino acid phosphorylation; EXPRESSED IN: 21 plant structures; EXPRESSED DURING: 7 growth stages; CONTAINS InterPro DOMAIN/s: Protein kinase, ATP binding site (InterPro:IPR017441), Protein kinase, catalytic domain (InterPro:IPR000719), Serine/threonine-protein kinase domain (InterPro:IPR002290), Serine/threoni…	AGC_RSK-2	PK		Pita_unigene61775	1.4058	1.22639	1.00911	3.34254	5.1843	0.742067	1.10141	0.340007	0.518008	1.91587	1.42145	0.805161	0.880506	0.207931	1.23235	1.18289	0.259548	1.15637	1.49526	0	1.76519	0.531917	0.557203	0.208919	0.75331	1.05072	1.16775	0.0340661	0.14963	0.0964156	0	0.459542	0.485134	0	0.0658749	0.0946316	0.130665	0.0777961	0.311213	0
Pita_unigene60174	AT1G67720	1.69e-126	Leucine-rich repeat protein kinase family protein	0	Leucine-rich repeat protein kinase family protein; FUNCTIONS IN: protein kinase activity, kinase activity; INVOLVED IN: protein amino acid phosphorylation; LOCATED IN: endomembrane system; EXPRESSED IN: 21 plant structures; EXPRESSED DURING: 13 growth stages; CONTAINS InterPro DOMAIN/s: Protein kinase, ATP binding site (InterPro:IPR017441), Protein kinase, catalytic domain (InterPro:IPR000719), S…	RLK-Pelle_LRR-I-1	PK		Pita_unigene60174	1.23295	5.35078	2.72625	3.52694	4.88582	2.02416	0.552791	2.18352	2.22595	1.99276	2.95667	2.26065	2.90712	2.01428	5.15163	3.79162	2.16458	0.44005	1.92906	1.37606	3.15888	1.82357	0.28546	1.91095	1.37418	4.793	1.52689	0.326769	0.856266	6.54785	0.378326	1.83997	0.785138	0.417518	0.470471	0.809687	0.215845	2.66966	1.29729	0.470741
Pita_unigene59665	AT5G55090	2.53e-57	mitogen-activated protein kinase kinase kinase 15	member of MEKK subfamily	mitogen-activated protein kinase kinase kinase 15 (MAPKKK15); FUNCTIONS IN: protein serine/threonine kinase activity, protein kinase activity, kinase activity, ATP binding; INVOLVED IN: protein amino acid phosphorylation; LOCATED IN: cellular_component unknown; CONTAINS InterPro DOMAIN/s: Protein kinase, ATP binding site (InterPro:IPR017441), Protein kinase, catalytic domain (InterPro:IPR000719),…	STE_STE11	PK		Pita_unigene59665	1.69842	1.10162	1.8164	0.942265	1.24272	2.64133	0.708753	0.60973	0.350963	0.972615	0.495113	1.00802	0.262946	0.647325	0.886979	0.428243	0.497618	0.665427	0.403091	0.542626	1.06559	0.468452	0.377425	0.962588	1.09444	1.29477	1.19954	0.15689	0.448114	0.370314	0.269841	0.244334	0.215021	0.151533	0.379337	0.254477	2.52032	1.29919	2.27014	3.16913
Pita_unigene59535	AT5G40380	2.8e-109	cysteine-rich RLK (RECEPTOR-like protein kinase) 42	Encodes a cysteine-rich receptor-like protein kinase.	cysteine-rich RLK (RECEPTOR-like protein kinase) 42 (CRK42); FUNCTIONS IN: kinase activity; INVOLVED IN: protein amino acid phosphorylation; LOCATED IN: endomembrane system; EXPRESSED IN: 11 plant structures; EXPRESSED DURING: 7 growth stages; CONTAINS InterPro DOMAIN/s: Protein kinase, ATP binding site (InterPro:IPR017441), Protein kinase, catalytic domain (InterPro:IPR000719), Protein of unknow…	RLK-Pelle_DLSV	PK		Pita_unigene59535	1.10805	0.264197	0.436706	0.574059	0.528828	0.332433	0.47905	0.239055	0.235698	0.478888	0.440808	0.344639	0.458437	0.312669	0.151799	0.926143	0.143109	0.609339	0.559089	0.235634	0.157073	0.635638	0.738672	0.251726	0.291952	0.152026	0.355174	0.0480245	0.0420678	0.067631	0.259835	0.223466	0.287741	0.0927982	0.0926938	0.110463	0.253051	0.186053	0.437698	0.205747
Pita_unigene59481	AT4G26890	1.43e-24	mitogen-activated protein kinase kinase kinase 16	member of MEKK subfamily	mitogen-activated protein kinase kinase kinase 16 (MAPKKK16); FUNCTIONS IN: protein serine/threonine kinase activity, protein kinase activity, kinase activity, ATP binding; INVOLVED IN: protein amino acid phosphorylation; EXPRESSED IN: root, carpel; EXPRESSED DURING: 4 anthesis; CONTAINS InterPro DOMAIN/s: Protein kinase, ATP binding site (InterPro:IPR017441), Serine/threonine-protein kinase doma…	STE_STE11	PK		Pita_unigene59481	2.94054	1.86742	1.00782	1.10592	2.20355	4.19791	0.80887	0.849769	0.571134	1.16738	0.930396	1.14826	1.987	1.43997	1.53893	1.35447	1.21058	0.700372	0.347899	1.31603	0.697538	1.02591	0.409192	0.652803	3.28038	3.2159	1.88699	4.72918	1.53063	1.15626	4.69859	3.59128	2.04395	4.61855	7.25167	6.98466	1.66735	4.61478	3.11008	2.05767
Pita_unigene59465	AT5G55910	1.56e-94	D6 protein kinase	D6PK is a protein kinase involved that plays a role in polar auxin transport. Most likely acts redundantly with the related proteins: D6PKL1,D6PKL2,and D6PKL3. PIN1 is a target of D6PK phosphorylation.	D6 protein kinase (D6PK); CONTAINS InterPro DOMAIN/s: Protein kinase, catalytic domain (InterPro:IPR000719), Serine/threonine-protein kinase domain (InterPro:IPR002290), Serine/threonine-protein kinase-like domain (InterPro:IPR017442), Protein kinase-like domain (InterPro:IPR011009), Serine/threonine-protein kinase, active site (InterPro:IPR008271); BEST Arabidopsis thaliana protein match is: D6 …	AGC_RSK-2	PK		Pita_unigene59465	5.04159	9.65167	14.9839	4.73253	5.21807	3.36633	16.6568	43.7193	23.8351	16.0269	39.8999	6.72887	6.38515	31.1454	23.5558	17.2194	3.16424	11.9673	4.11925	10.0271	6.5694	7.35982	10.5963	2.19774	113.158	70.7211	31.6174	137.759	103.866	31.8798	280.19	277.566	121.311	225.811	442.284	126.143	42.2994	50.0758	20.3139	43.8409
Pita_unigene5817	AT3G51990	5.06e-93	Protein kinase superfamily protein	0	Protein kinase superfamily protein; FUNCTIONS IN: protein serine/threonine kinase activity, protein kinase activity, kinase activity, ATP binding; INVOLVED IN: protein amino acid phosphorylation; EXPRESSED IN: 24 plant structures; EXPRESSED DURING: 14 growth stages; CONTAINS InterPro DOMAIN/s: Protein kinase, ATP binding site (InterPro:IPR017441), Protein kinase, catalytic domain (InterPro:IPR000…	RLK-Pelle_CR4L	PK		Pita_unigene5817	4.61076	1.49165	0.833643	0.613122	0.426202	0.813855	8.4875	2.65699	1.50571	1.38096	1.25396	0.88504	0.899479	0.614629	0.955764	0.776854	0.728197	5.01631	0.767789	2.20422	1.20981	0.826918	5.46026	1.2005	0.74253	1.04178	0.834144	0.626137	0.378312	0.775888	0.499999	0.609445	0.6865	0.415771	0.302781	0.580335	0.450376	1.16215	0.357628	0.504563
Pita_unigene58001	AT5G02070	1.19e-110	Protein kinase family protein	0	Protein kinase family protein; FUNCTIONS IN: kinase activity; INVOLVED IN: protein amino acid phosphorylation; CONTAINS InterPro DOMAIN/s: Protein kinase, ATP binding site (InterPro:IPR017441), Protein kinase, catalytic domain (InterPro:IPR000719), Serine/threonine-protein kinase-like domain (InterPro:IPR017442), Protein kinase-like domain (InterPro:IPR011009), Serine/threonine-protein kinase, ac…	RLK-Pelle_WAK_LRK10L-1	PK		Pita_unigene58001	7.79178	5.84725	8.26851	3.2908	5.04719	4.77297	4.3694	3.66658	6.58714	4.03379	3.60514	4.59453	2.31142	1.42	2.72609	5.54809	2.88596	3.03412	2.10155	0.537793	3.19169	2.48073	1.92043	2.25923	2.95638	5.00078	3.64089	0.558073	0.815784	0.477689	1.33092	1.2765	1.08408	0.748567	0.576763	0.287181	1.32796	1.16822	1.48226	0.537716
Pita_unigene57581	AT1G56120	8.51e-92	Leucine-rich repeat transmembrane protein kinase	0	Leucine-rich repeat transmembrane protein kinase; FUNCTIONS IN: kinase activity; INVOLVED IN: protein amino acid phosphorylation; CONTAINS InterPro DOMAIN/s: Protein kinase, ATP binding site (InterPro:IPR017441), Serine/threonine-protein kinase domain (InterPro:IPR002290), Leucine-rich repeat (InterPro:IPR001611), Serine-threonine/tyrosine-protein kinase (InterPro:IPR001245), Protein kinase-like …	RLK-Pelle_DLSV	PK		Pita_unigene57581	0.668843	1.91778	0.353796	0.349233	0.757373	0	0.362097	0.470498	0.20684	0.136428	0.880592	0.168216	0.0971394	0.181713	1.04625	0.577815	0.0759934	0.179292	0.301265	0.808855	0.79869	0.380702	1.05835	0	0	0	0.171059	1.31425	0	0.182379	0	0	0	0.458925	0	0	0	0	0.84862	0.915712
Pita_unigene57577	AT5G48740	1.16e-92	Leucine-rich repeat protein kinase family protein	0	Leucine-rich repeat protein kinase family protein; FUNCTIONS IN: kinase activity; INVOLVED IN: protein amino acid phosphorylation; LOCATED IN: endomembrane system; EXPRESSED IN: 10 plant structures; EXPRESSED DURING: LP.04 four leaves visible, 4 anthesis, petal differentiation and expansion stage; CONTAINS InterPro DOMAIN/s: Protein kinase, ATP binding site (InterPro:IPR017441), Protein kinase, c…	RLK-Pelle_LRR-I-1	PK		Pita_unigene57577	13.366	21.3673	9.81839	8.09261	13.4191	20.4048	9.77946	13.8954	12.3452	12.3218	10.7484	27.4579	7.75165	11.0949	17.9239	22.8962	25.0476	13.8331	9.4129	11.2486	9.26764	11.2748	7.71281	15.1072	13.5044	8.07882	17.035	1.06769	7.32089	17.6441	10.5761	2.57037	14.357	0.564717	4.76303	6.56318	12.6321	7.03086	21.8874	1.02562
Pita_unigene5698	AT5G54380	0	protein kinase family protein	Encodes THESEUS1 (THE1), a receptor kinase regulated by Brassinosteroids and required for cell elongation during vegetative growth.	THESEUS1 (THE1); FUNCTIONS IN: protein kinase activity, kinase activity; INVOLVED IN: in 6 processes; LOCATED IN: plasma membrane; EXPRESSED IN: 26 plant structures; EXPRESSED DURING: 13 growth stages; CONTAINS InterPro DOMAIN/s: Protein kinase, ATP binding site (InterPro:IPR017441), Malectin/receptor-like protein kinase (InterPro:IPR021720), Protein kinase, catalytic domain (InterPro:IPR000719),…	RLK-Pelle_CrRLK1L-1	PK		Pita_unigene5698	3.01317	2.97938	3.07251	0.858931	3.79534	1.75825	1.85173	4.14289	3.36875	2.5391	4.32022	2.90466	1.50051	2.6848	3.18596	5.66692	1.63528	2.95391	2.48211	4.14401	2.49045	3.7293	2.53762	2.74691	6.57967	4.89827	3.30902	5.95503	2.65265	3.90539	10.399	13.4291	11.167	8.47507	7.2504	6.29346	6.16882	5.4954	5.61187	4.95719
Pita_unigene5651	AT5G28290	1.01e-145	NIMA-related kinase 3	Encodes AtNek3, a member of the NIMA-related serine/threonine kinases (Neks) that have been linked to cell-cycle regulation in fungi and mammals. Plant Neks might be involved in plant development processes.	NIMA-related kinase 3 (NEK3); FUNCTIONS IN: protein serine/threonine kinase activity, protein kinase activity, kinase activity, ATP binding; INVOLVED IN: protein amino acid phosphorylation; LOCATED IN: cellular_component unknown; EXPRESSED IN: 16 plant structures; EXPRESSED DURING: 11 growth stages; CONTAINS InterPro DOMAIN/s: Protein kinase, ATP binding site (InterPro:IPR017441), Protein kinase,…	NEK	PK		Pita_unigene5651	11.1799	22.5677	32.7399	37.7863	58.1288	37.2101	18.7046	9.06391	12.1669	10.2648	6.03766	9.31624	21.0621	13.4098	29.1066	17.3326	11.5911	27.1313	17.6473	14.191	42.1039	26.5926	26.5482	8.43835	8.30077	7.70583	16.4652	7.36701	15.8132	11.0639	3.34435	8.12776	6.4419	2.42583	2.62549	2.05055	4.49083	3.30579	6.26385	1.24929
Pita_unigene5111	AT2G41890	6.36e-111	curculin-like (mannose-binding) lectin family protein / PAN domain-containing protein	0	curculin-like (mannose-binding) lectin family protein / PAN domain-containing protein; FUNCTIONS IN: sugar binding, protein kinase activity, ATP binding; INVOLVED IN: protein amino acid phosphorylation, recognition of pollen; LOCATED IN: endomembrane system; EXPRESSED IN: 22 plant structures; EXPRESSED DURING: 13 growth stages; CONTAINS InterPro DOMAIN/s: Curculin-like (mannose-binding) lectin (I…	RLK-Pelle_L-LEC	PK		Pita_unigene5111	0.244199	0.573791	0.223351	0.405026	0.98557	0.121475	0.266877	0.442533	0.310773	0.311548	0.317072	0.189041	0.219167	0.249286	0.704776	0.243842	0.0694355	0.328287	0.0954216	0.08059	0.325416	0.0938844	0.220506	0.020182	0.214047	0.534015	0.18937	0.0613724	0.233366	0.250395	0.0603456	0.0976665	0.0934099	0.0395232	0.185873	0.245626	0.117651	0.14004	0.173641	0
Pita_unigene4940	AT5G49660	4.47e-104	Leucine-rich repeat transmembrane protein kinase family protein	The gene encodes receptorlike kinase (RLK). Involved in the maintenance organization of cell files or cell morphology in conductive elements.	Leucine-rich repeat transmembrane protein kinase family protein; FUNCTIONS IN: kinase activity; INVOLVED IN: protein amino acid phosphorylation; LOCATED IN: endomembrane system; EXPRESSED IN: 20 plant structures; EXPRESSED DURING: 10 growth stages; CONTAINS InterPro DOMAIN/s: Protein kinase, ATP binding site (InterPro:IPR017441), Protein kinase, catalytic domain (InterPro:IPR000719), Leucine-rich…	RLK-Pelle_LRR-XI-1	PK		Pita_unigene4940	12.1445	12.4739	10.2915	6.6035	13.227	9.43426	11.1277	9.04541	9.11937	6.95929	8.54371	10.2785	5.64039	4.3215	7.65698	8.66889	7.11377	7.60697	4.9931	2.05794	8.05975	5.07886	5.37003	4.12449	2.624	3.75244	2.56812	0.55285	0.864088	0.984818	0.363984	0.802239	0.835845	0.0636388	0.241914	0.231915	0.59284	0.467508	2.19621	0.169318
Pita_unigene49295	AT5G49660	1.79e-97	Leucine-rich repeat transmembrane protein kinase family protein	The gene encodes receptorlike kinase (RLK). Involved in the maintenance organization of cell files or cell morphology in conductive elements.	Leucine-rich repeat transmembrane protein kinase family protein; FUNCTIONS IN: kinase activity; INVOLVED IN: protein amino acid phosphorylation; LOCATED IN: endomembrane system; EXPRESSED IN: 20 plant structures; EXPRESSED DURING: 10 growth stages; CONTAINS InterPro DOMAIN/s: Protein kinase, ATP binding site (InterPro:IPR017441), Protein kinase, catalytic domain (InterPro:IPR000719), Leucine-rich…	RLK-Pelle_LRR-XI-1	PK		Pita_unigene49295	12.2921	11.1882	8.95525	5.07168	11.0709	11.2163	8.7969	7.37484	8.01981	6.11279	10.0133	6.00268	3.90947	4.42353	9.26342	8.68317	5.51219	6.41773	3.07347	3.64471	7.22523	3.28663	3.73477	4.61919	3.13483	4.61478	2.59225	0.424266	0.644238	0.648342	0.458285	0.768271	1.72887	0.0459447	0.220462	0.106706	0.455118	1.84686	1.40415	0.0270216
Pita_unigene47027	AT5G07280	0	Leucine-rich repeat transmembrane protein kinase	Encodes EMS1 (EXCESS MICROSPOROCYTES1), a putative leucine-rich repeat receptor protein kinase that controls somatic and reproductive cell fates in Arabidopsis anther.	EXCESS MICROSPOROCYTES1 (EMS1); CONTAINS InterPro DOMAIN/s: Protein kinase, ATP binding site (InterPro:IPR017441), Serine/threonine-protein kinase domain (InterPro:IPR002290), Leucine-rich repeat-containing N-terminal domain, type 2 (InterPro:IPR013210), Leucine-rich repeat (InterPro:IPR001611), Serine/threonine-protein kinase-like domain (InterPro:IPR017442), Serine/threonine-protein kinase, act…	RLK-Pelle_LRR-Xb-1	PK		Pita_unigene47027	0.04491	0.0783448	0.443954	0.372375	0.62442	0.188039	0.159384	0.0222801	0.199685	0.212623	0.0649061	0.0114705	0.0747792	0.0291588	0.899119	0.210303	0	0.359104	0.218869	0.0329783	0.0313664	0.0102572	0.0215029	0	0.274002	0.0354831	0.0103435	0.0111805	0	0.0105123	0	0.0115736	0	0.0108009	0	0.0206164	0.0214268	0.0892414	0.0226633	0.00958861
Pita_unigene46841	AT5G48740	3.16e-122	Leucine-rich repeat protein kinase family protein	0	Leucine-rich repeat protein kinase family protein; FUNCTIONS IN: kinase activity; INVOLVED IN: protein amino acid phosphorylation; LOCATED IN: endomembrane system; EXPRESSED IN: 10 plant structures; EXPRESSED DURING: LP.04 four leaves visible, 4 anthesis, petal differentiation and expansion stage; CONTAINS InterPro DOMAIN/s: Protein kinase, ATP binding site (InterPro:IPR017441), Protein kinase, c…	RLK-Pelle_LRR-I-1	PK		Pita_unigene46841	1.39172	0.893508	2.84963	0.371893	5.82499	0.350096	0.811858	3.92825	0.629634	0.15731	0.661977	0.608385	0.183972	1.34171	0.380572	1.57966	0.269034	0.879286	0.0705647	1.87338	0.251867	0.655754	1.51295	0.70816	0.406467	1.34145	0.241277	0.20482	0.155	0.1299	0.0340344	0.925909	0.18388	0.107921	0.125915	0.0343824	0.0994177	0.927057	0.18881	0.159784
Pita_unigene46646	AT5G65700	0	Leucine-rich receptor-like protein kinase family protein	Encodes a CLAVATA1-related receptor kinase-like protein required for both shoot and flower meristem function. Very similar to BAM2,with more than 85% a.a. identity. It has a broad expression pattern and is involved in vascular strand development in the leaf, control of leaf shape, size and symmetry, male gametophyte development and ovule specification and function. Anthers of double mutants (bam1…	BARELY ANY MERISTEM 1 (BAM1); CONTAINS InterPro DOMAIN/s: Protein kinase, catalytic domain (InterPro:IPR000719), Leucine-rich repeat-containing N-terminal domain, type 2 (InterPro:IPR013210), Leucine-rich repeat (InterPro:IPR001611), Serine/threonine-protein kinase-like domain (InterPro:IPR017442), Protein kinase-like domain (InterPro:IPR011009), Serine/threonine-protein kinase, active site (Inte…	RLK-Pelle_LRR-XI-1	PK		Pita_unigene46646	1.66354	2.3634	2.68305	2.76114	8.67095	2.23188	1.6397	0.758896	1.68454	0.915994	0.69423	0.533141	0.956736	0.650152	6.89689	2.60111	0.484568	2.87401	0.425352	0.311596	1.24452	0.418594	0.877492	0.243831	2.49907	0.710814	0.433851	0.253467	0.555682	0.405228	0.361446	0.406749	0.25015	0.0489717	0.13463	0.058439	0.461487	0.621448	0.561961	0.0217403
Pita_unigene45770	AT2G01950	0	BRI1-like 2	Encodes a leucine rich repeat receptor kinase and associated with provascular/procambial cells. Similar to BRI, brassinosteroid receptor protein.	BRI1-like 2 (BRL2); FUNCTIONS IN: protein binding, protein serine/threonine kinase activity, transmembrane receptor protein serine/threonine kinase activity, ATP binding; INVOLVED IN: in 7 processes; LOCATED IN: cellular_component unknown; EXPRESSED IN: 22 plant structures; EXPRESSED DURING: 13 growth stages; CONTAINS InterPro DOMAIN/s: Protein kinase, ATP binding site (InterPro:IPR017441), Serin…	RLK-Pelle_LRR-Xb-1	PK		Pita_unigene45770	0.635877	0.949302	2.12804	0.618823	1.59626	0.616059	0.860778	1.29746	1.15984	0.619157	0.643754	0.479196	0.513922	1.48911	1.63686	1.72361	0.649113	1.67059	0.329862	1.05798	0.701495	0.571308	0.69405	0.396063	0.693741	0.64416	0.432103	0.122957	0.248218	0.346086	0.250494	0.351673	0.587083	0.0683512	0.118667	0.169704	1.05776	0.839215	0.817669	0.24278
Pita_unigene45765	AT1G77280	1.3e-132	Protein kinase protein with adenine nucleotide alpha hydrolases-like domain	0	Protein kinase protein with adenine nucleotide alpha hydrolases-like domain; FUNCTIONS IN: protein serine/threonine kinase activity, protein kinase activity, kinase activity, ATP binding; INVOLVED IN: protein amino acid phosphorylation, response to stress; LOCATED IN: cellular_component unknown; EXPRESSED IN: 16 plant structures; EXPRESSED DURING: 6 growth stages; CONTAINS InterPro DOMAIN/s: UspA…	RLK-Pelle_RLCK-VI	PK		Pita_unigene45765	0.715104	0.752434	1.27876	1.09862	2.09696	0.9659	1.38775	1.65776	1.754	1.92769	1.40462	1.58438	1.48338	0.823999	2.51825	1.9102	1.23655	1.93287	0.944083	0.649007	0.778464	1.00856	1.0848	0.765033	1.14355	1.0921	0.724463	0.99958	0.882868	0.460166	1.31017	2.0346	1.46232	0.642944	1.18636	0.750552	0.631165	0.642719	0.44442	0.530591
Pita_unigene4517	AT5G56040	0	Leucine-rich receptor-like protein kinase family protein	0	Leucine-rich receptor-like protein kinase family protein; FUNCTIONS IN: protein serine/threonine kinase activity, kinase activity, ATP binding; INVOLVED IN: transmembrane receptor protein tyrosine kinase signaling pathway, protein amino acid phosphorylation; LOCATED IN: endomembrane system; EXPRESSED IN: 22 plant structures; EXPRESSED DURING: 13 growth stages; CONTAINS InterPro DOMAIN/s: Protein …	RLK-Pelle_LRR-XI-1	PK		Pita_unigene4517	0.317137	0.522279	1.00171	0.443055	0.942404	0.706267	0.46969	0.232565	0.563999	0.208904	0.518163	0.380322	0.327975	0.57301	1.46379	1.46806	0.711362	0.998316	0.307178	0.675152	0.552087	0.541601	0.277229	0.348176	0.260006	0.290613	0.330246	0.63146	0.108351	0.116206	0.0269999	0.156352	0.164847	0.318267	0.0397734	0	0.513041	0.610556	0.47312	1.08333
Pita_unigene45134	AT4G36180	5.2e-139	Leucine-rich receptor-like protein kinase family protein	0	Leucine-rich receptor-like protein kinase family protein; FUNCTIONS IN: protein serine/threonine kinase activity, kinase activity, ATP binding; INVOLVED IN: transmembrane receptor protein tyrosine kinase signaling pathway, protein amino acid phosphorylation; LOCATED IN: plasma membrane; EXPRESSED IN: 21 plant structures; EXPRESSED DURING: 13 growth stages; CONTAINS InterPro DOMAIN/s: Protein kina…	RLK-Pelle_LRR-VII-3	PK		Pita_unigene45134	0.297713	1.15684	0.930927	0.277843	2.71507	0.439436	0.703421	0.560986	0.714442	0.338329	3.52999	0.303998	0.28318	0.851008	1.60548	3.19873	0.4262	1.0607	0.248634	0.262726	0.664934	2.20108	0.427036	0.362827	0.627129	1.79211	0.274083	0.0591843	0.129932	0.111597	0.116363	1.25839	0.12957	0	0.0858142	0.0821343	0.312093	2.06061	0.150145	0.0762496
Pita_unigene44855	AT1G68400	0	leucine-rich repeat transmembrane protein kinase family protein	0	leucine-rich repeat transmembrane protein kinase family protein; FUNCTIONS IN: protein serine/threonine kinase activity, kinase activity, ATP binding; INVOLVED IN: transmembrane receptor protein tyrosine kinase signaling pathway, protein amino acid phosphorylation; LOCATED IN: endomembrane system; EXPRESSED IN: 21 plant structures; EXPRESSED DURING: 13 growth stages; CONTAINS InterPro DOMAIN/s: P…	RLK-Pelle_LRR-III	PK		Pita_unigene44855	0.745925	1.71895	1.84359	1.13587	2.21123	1.00968	0.617145	0.994225	0.849597	0.618075	1.2132	0.880843	0.731762	0.565243	1.9911	1.37869	0.530924	0.831462	0.346132	0.296981	0.520747	0.127698	0.289918	0.263819	0.904696	0.418129	0.364908	0.370956	0.468026	0.545943	0.159567	0.216274	0.329565	0.0447914	0.156823	0.128545	0.511162	0.555575	0.399788	0.0398059
Pita_unigene43238	AT3G59110	1.13e-174	Protein kinase superfamily protein	0	Protein kinase superfamily protein; FUNCTIONS IN: protein serine/threonine kinase activity, protein kinase activity, kinase activity, ATP binding; INVOLVED IN: protein amino acid phosphorylation; LOCATED IN: plasma membrane; EXPRESSED IN: 22 plant structures; EXPRESSED DURING: 13 growth stages; CONTAINS InterPro DOMAIN/s: Protein kinase, ATP binding site (InterPro:IPR017441), Protein kinase, cata…	RLK-Pelle_RLCK-V	PK		Pita_unigene43238	0.23963	0.695909	0.426021	0.235158	0.0859922	0.26381	0	0.146025	0.201576	0.070963	0	0	0	0	0.30783	0.225638	0.155026	0.317803	0	0.257482	0.0787631	0.240599	0.0897588	0	0.1651	0.0688886	0.242594	0	0	0	0.0486568	0.182849	0	0	0.0636658	0	0.442616	0.448517	0.328381	0.337262
Pita_unigene4304	AT1G10850	2.11e-172	Leucine-rich repeat protein kinase family protein	0	Leucine-rich repeat protein kinase family protein; FUNCTIONS IN: protein serine/threonine kinase activity, protein kinase activity, ATP binding; INVOLVED IN: transmembrane receptor protein tyrosine kinase signaling pathway, protein amino acid phosphorylation; LOCATED IN: endomembrane system; EXPRESSED IN: 22 plant structures; EXPRESSED DURING: 13 growth stages; CONTAINS InterPro DOMAIN/s: Protein…	RLK-Pelle_LRR-III	PK		Pita_unigene4304	1.10112	2.14584	1.39042	0.868832	0.594143	0.744543	0.824022	0.538046	0.672179	0.451307	0.823522	0.822604	0.437802	0.327284	0.798287	0.745262	0.666699	0.648722	0.442378	0.257562	0.719175	0.480334	0.755114	0.457902	0.966083	1.26474	0.999089	0.0654294	0.430458	0.246263	0.289535	0.711551	0.428763	0.0316029	0.173801	0.241533	0.423265	0.746302	1.02822	0.168411
Pita_unigene41775	AT2G45340	5.5e-141	Leucine-rich repeat protein kinase family protein	0	Leucine-rich repeat protein kinase family protein; FUNCTIONS IN: protein serine/threonine kinase activity, protein kinase activity, ATP binding; INVOLVED IN: transmembrane receptor protein tyrosine kinase signaling pathway, protein amino acid phosphorylation; LOCATED IN: endomembrane system; EXPRESSED IN: 21 plant structures; EXPRESSED DURING: 13 growth stages; CONTAINS InterPro DOMAIN/s: Protein…	RLK-Pelle_LRR-IV	PK		Pita_unigene41775	2.54206	0.989837	1.7467	1.9694	3.06538	1.38016	2.01597	0.666501	2.02569	1.93697	1.77448	1.67084	1.66758	0.733971	3.07271	1.5553	0.935151	2.30144	0.867645	0.372438	1.00611	0.693433	1.22945	0.483279	1.78173	1.11078	0.672512	0.203314	0.790641	1.12262	0.942249	0.90369	0.890132	0.168331	0.168449	0.591117	1.16957	0.79571	0.854703	0.299344
Pita_unigene41098	AT4G13000	6.51e-78	AGC (cAMP-dependent, cGMP-dependent and protein kinase C) kinase family protein	0	AGC (cAMP-dependent, cGMP-dependent and protein kinase C) kinase family protein; FUNCTIONS IN: kinase activity; INVOLVED IN: protein amino acid phosphorylation; LOCATED IN: cellular_component unknown; EXPRESSED IN: 21 plant structures; EXPRESSED DURING: 10 growth stages; CONTAINS InterPro DOMAIN/s: Protein kinase, catalytic domain (InterPro:IPR000719), Serine/threonine-protein kinase domain (Inte…	AGC_RSK-2	PK		Pita_unigene41098	2.24925	9.69566	5.33737	8.58461	8.45332	2.20499	2.91037	2.22807	4.55095	3.88017	5.70031	2.36362	5.52332	1.98098	5.34893	5.61152	1.04409	2.49702	4.78766	0.428552	5.6556	4.37788	1.88953	1.45933	2.26613	1.89482	1.53783	0.570867	0.567934	0.0862338	0.320958	0.336868	0.598775	0	0.216305	0	0.312696	0.843149	0.785734	0.178544
Pita_unigene41031	AT1G64300	2.19e-46	Protein kinase family protein	0	Protein kinase family protein; FUNCTIONS IN: protein serine/threonine/tyrosine kinase activity, kinase activity; INVOLVED IN: protein amino acid phosphorylation; LOCATED IN: endomembrane system; EXPRESSED IN: 12 plant structures; EXPRESSED DURING: 8 growth stages; CONTAINS InterPro DOMAIN/s: Protein kinase, catalytic domain (InterPro:IPR000719), Protein of unknown function DUF1221 (InterPro:IPR01…	TKL_Gdt	PK		Pita_unigene41031	5.4623	5.32533	6.7266	4.32251	3.9735	3.93171	3.44935	4.21788	2.85129	3.46982	4.48335	4.03575	2.82048	2.90863	3.58831	2.91618	2.34842	3.17757	2.75055	3.12145	2.41868	2.79705	2.66645	2.60143	3.93551	7.24905	5.38412	1.92172	2.22444	4.21214	1.27762	2.06867	2.28156	0.45743	1.02978	0.974083	2.57063	3.91203	3.72612	1.89679
Differentially expressed Protein kinases family against drought stress
Pita_unigene37553	AT5G01020	0	Protein kinase superfamily protein	0	Protein kinase superfamily protein; FUNCTIONS IN: protein serine/threonine kinase activity, protein kinase activity, kinase activity, ATP binding; INVOLVED IN: protein amino acid phosphorylation, N-terminal protein myristoylation; LOCATED IN: plasma membrane; EXPRESSED IN: 22 plant structures; EXPRESSED DURING: 13 growth stages; CONTAINS InterPro DOMAIN/s: Protein kinase, ATP binding site (InterP…	RLK-Pelle_RLCK-VIIa-2	PK		Pita_unigene37553	0.366225	2.12431	3.1705	1.68687	2.37144	2.15355	0.43902	1.22173	2.4459	1.62686	1.15913	2.32901	1.06422	1.8105	6.68016	1.75829	2.00665	1.14157	0.269137	0.454823	1.1767	0.609759	0.682516	1.12217	1.61101	0.534953	0.724296	0.0756373	1.1685	0.523896	0.451664	1.00101	0.755233	0.344534	0.643207	0.273266	0.677058	0.514926	1.30848	0.118787
Pita_unigene37265	AT1G28440	7.51e-77	HAESA-like 1	0	HAESA-like 1 (HSL1); FUNCTIONS IN: protein serine/threonine kinase activity, kinase activity, ATP binding; INVOLVED IN: transmembrane receptor protein tyrosine kinase signaling pathway, protein amino acid phosphorylation; EXPRESSED IN: 22 plant structures; EXPRESSED DURING: 13 growth stages; CONTAINS InterPro DOMAIN/s: Protein kinase, ATP binding site (InterPro:IPR017441), Protein kinase, catalyt…	RLK-Pelle_LRR-XI-1	PK		Pita_unigene37265	2.78713	7.58347	6.41244	5.47532	4.68903	4.76119	6.77198	6.3023	6.67765	8.43439	7.02156	8.463	3.51341	5.5033	5.20309	6.12288	6.50911	5.65406	3.4098	2.10792	5.75728	4.38797	4.39505	3.2615	2.78295	2.97272	3.77026	1.97639	2.25552	2.05924	0.381755	2.55438	2.40692	0.751771	1.03448	3.26117	0.688742	3.73083	3.94126	1.69558
Pita_unigene33249	AT5G55090	1.33e-38	mitogen-activated protein kinase kinase kinase 15	member of MEKK subfamily	mitogen-activated protein kinase kinase kinase 15 (MAPKKK15); FUNCTIONS IN: protein serine/threonine kinase activity, protein kinase activity, kinase activity, ATP binding; INVOLVED IN: protein amino acid phosphorylation; LOCATED IN: cellular_component unknown; CONTAINS InterPro DOMAIN/s: Protein kinase, ATP binding site (InterPro:IPR017441), Protein kinase, catalytic domain (InterPro:IPR000719),…	STE_STE11	PK		Pita_unigene33249	17.5081	1.73805	2.76289	2.61023	2.31775	17.0788	0.701099	1.72878	1.54903	1.18979	1.70066	1.52336	2.85309	2.84378	2.00426	3.94078	1.80156	0.905157	1.1568	0.998058	1.62129	0.90626	0.235828	1.51944	7.17603	4.61679	2.75137	6.59185	3.70673	6.38587	9.56974	7.73854	4.68307	6.59095	15.9833	15.1999	3.73704	10.3796	7.03898	6.17432
Pita_unigene3103	AT3G24550	8.14e-130	proline extensin-like receptor kinase 1	Encodes a member of the proline-rich extensin-like receptor kinase (PERK) family. This family consists of 15 predicted receptor kinases (PMID: 15653807).	proline extensin-like receptor kinase 1 (PERK1); FUNCTIONS IN: protein kinase activity, ATP binding; INVOLVED IN: protein amino acid phosphorylation, response to fungus, response to wounding; LOCATED IN: plasma membrane; EXPRESSED IN: 25 plant structures; EXPRESSED DURING: 13 growth stages; CONTAINS InterPro DOMAIN/s: Protein kinase, ATP binding site (InterPro:IPR017441), Protein kinase, catalyti…	RLK-Pelle_PERK-1	PK		Pita_unigene3103	15.3439	4.98489	7.15257	2.61202	7.34966	7.177	6.47189	21.9108	3.99796	7.06827	8.02585	21.6649	0	12.9787	5.97349	20.9987	8.4234	16.3789	11.2411	31.9122	17.9892	15.0903	25.0812	25.1191	74.3682	15.4767	10.2017	49.1944	12.9031	4.45536	156.692	59.2182	30.8462	57.1073	34.9293	53.9306	160.463	34.7709	31.6438	50.3615
Pita_unigene3088	AT1G10850	3.94e-172	Leucine-rich repeat protein kinase family protein	0	Leucine-rich repeat protein kinase family protein; FUNCTIONS IN: protein serine/threonine kinase activity, protein kinase activity, ATP binding; INVOLVED IN: transmembrane receptor protein tyrosine kinase signaling pathway, protein amino acid phosphorylation; LOCATED IN: endomembrane system; EXPRESSED IN: 22 plant structures; EXPRESSED DURING: 13 growth stages; CONTAINS InterPro DOMAIN/s: Protein…	RLK-Pelle_LRR-III	PK		Pita_unigene3088	2.70616	2.77353	0.899825	0.538831	2.22517	3.0569	2.86409	0.500557	2.31106	0.651485	1.85631	2.56138	0.363656	0.450071	3.03955	2.09503	2.21025	2.64447	0.241255	0.0898452	2.2777	0.600493	2.59062	1.78384	0.813985	0.467337	0.563327	1.6893	0.42716	0.486806	0.209527	0.425539	0.432082	1.57309	0.338089	0.182548	0.364623	0.607525	0.493721	2.14123
Pita_unigene30876	AT5G24080	2.86e-56	Protein kinase superfamily protein	0	Protein kinase superfamily protein; FUNCTIONS IN: protein serine/threonine kinase activity, protein kinase activity, kinase activity, ATP binding; INVOLVED IN: protein amino acid phosphorylation; LOCATED IN: cellular_component unknown; EXPRESSED IN: sperm cell, stamen; EXPRESSED DURING: 4 anthesis; CONTAINS InterPro DOMAIN/s: Protein kinase, ATP binding site (InterPro:IPR017441), Serine/threonine…	RLK-Pelle_SD-2b	PK		Pita_unigene30876	4.57507	5.24623	16.2562	9.82417	3.04542	3.76158	1.99325	16.1315	4.71221	13.5293	3.99504	4.15393	7.07706	11.6619	2.6377	2.29235	4.23205	2.41995	8.60388	10.9481	3.01628	2.03986	1.53724	4.17993	3.03916	3.20913	2.59477	1.21869	2.26285	12.5291	1.78795	2.20162	2.07457	1.72904	1.20298	3.7206	1.75199	2.75108	2.96157	2.52354
Pita_unigene2867	AT5G48740	6.6e-68	Leucine-rich repeat protein kinase family protein	0	Leucine-rich repeat protein kinase family protein; FUNCTIONS IN: kinase activity; INVOLVED IN: protein amino acid phosphorylation; LOCATED IN: endomembrane system; EXPRESSED IN: 10 plant structures; EXPRESSED DURING: LP.04 four leaves visible, 4 anthesis, petal differentiation and expansion stage; CONTAINS InterPro DOMAIN/s: Protein kinase, ATP binding site (InterPro:IPR017441), Protein kinase, c…	RLK-Pelle_LRR-I-1	PK		Pita_unigene2867	4.93904	1.54065	1.95716	0.203371	2.77971	0.239596	5.41216	2.83373	2.17047	0.389301	0.324634	1.54079	0.257421	1.44949	0.597688	1.89578	0.783472	2.62129	0.261347	1.38715	0.549346	0.578902	6.1894	1.53864	1.18881	0.687888	0	0.040321	0.797801	0.250849	1.86808	0.209339	0.0867323	0.0389439	0.389985	0	0.132612	0.200618	0	0
Pita_unigene2665	AT4G33950	0	Protein kinase superfamily protein	Encodes calcium-independent ABA-activated protein kinase, a member of SNF1-related protein kinases (SnRK2) whose activity is activated by ionic (salt) and non-ionic (mannitol) osmotic stress. Mutations disrupted ABA induction of stomatal closure as well as ABA inhibition of light-induced stomatal opening. However, regulation of stomatal opening/closing by light or CO(2) is not affected in these m…	OPEN STOMATA 1 (OST1); FUNCTIONS IN: calcium-dependent protein serine/threonine kinase activity, protein kinase activity, kinase activity; INVOLVED IN: in 14 processes; LOCATED IN: cytosol, nucleus, cytoplasm; EXPRESSED IN: 25 plant structures; EXPRESSED DURING: 14 growth stages; CONTAINS InterPro DOMAIN/s: Protein kinase, catalytic domain (InterPro:IPR000719), Serine/threonine-protein kinase dom…	CAMK_OST1L	PK		Pita_unigene2665	32.4802	27.1758	39.8383	30.5067	65.5174	39.0685	30.6083	37.4029	28.6774	37.5726	43.8829	43.2303	38.9016	32.9351	38.0503	47.0737	34.4075	31.4815	26.8157	32.5105	27.092	33.8642	29.8573	33.6036	124.658	85.3262	66.2562	245.204	138.412	71.5505	161.513	134.762	149.062	178.333	189.503	129.649	103.329	89.6488	83.9852	156.677
Pita_unigene26046	AT5G01850	1.89e-122	Protein kinase superfamily protein	0	Protein kinase superfamily protein; FUNCTIONS IN: protein serine/threonine/tyrosine kinase activity, kinase activity; INVOLVED IN: protein amino acid phosphorylation; EXPRESSED IN: 22 plant structures; EXPRESSED DURING: 13 growth stages; CONTAINS InterPro DOMAIN/s: Protein kinase, ATP binding site (InterPro:IPR017441), Serine/threonine-protein kinase domain (InterPro:IPR002290), Serine-threonine/…	TKL-Pl-4	PK		Pita_unigene26046	0.28632	0.0674068	0.154401	0	0	0.366922	0.348496	0.388434	0.0783388	0.621702	0.177246	0.158018	0.121293	0.190894	0.094428	0.074716	0.793274	0.285856	0.150224	0	0.20698	0.165405	0	0.159671	0.295732	0.623902	0.392302	0.67287	0.445092	0.143869	0	0.331971	0	0	0.065304	0	1.02967	0.655869	0.202256	0.393924
Pita_unigene25922	AT1G28440	2.49e-140	HAESA-like 1	0	HAESA-like 1 (HSL1); FUNCTIONS IN: protein serine/threonine kinase activity, kinase activity, ATP binding; INVOLVED IN: transmembrane receptor protein tyrosine kinase signaling pathway, protein amino acid phosphorylation; EXPRESSED IN: 22 plant structures; EXPRESSED DURING: 13 growth stages; CONTAINS InterPro DOMAIN/s: Protein kinase, ATP binding site (InterPro:IPR017441), Protein kinase, catalyt…	RLK-Pelle_LRR-XI-1	PK		Pita_unigene25922	3.42777	5.9381	5.99617	6.00817	4.98738	4.33556	4.35062	6.79352	8.58011	6.13206	5.29368	5.33282	4.45808	6.28815	7.76402	4.46328	7.18706	4.82738	4.07045	3.57147	4.83754	3.97586	4.08436	4.51167	1.97681	3.07599	3.99404	1.48103	1.45653	3.42213	2.21589	1.61626	2.72826	1.37134	1.37329	4.30272	1.20956	1.17032	3.31243	4.47145
Pita_unigene24974	AT5G58380	3.92e-70	SOS3-interacting protein 1	Encodes a CBL-interacting protein kinase with similarity to SOS protein kinase.	SOS3-interacting protein 1 (SIP1); FUNCTIONS IN: protein serine/threonine kinase activity, protein kinase activity, kinase activity, ATP binding; INVOLVED IN: signal transduction, protein amino acid phosphorylation; LOCATED IN: cellular_component unknown; EXPRESSED IN: 23 plant structures; EXPRESSED DURING: 15 growth stages; CONTAINS InterPro DOMAIN/s: Protein kinase, ATP binding site (InterPro:I…	CAMK_CAMKL-CHK1	PK		Pita_unigene24974	2.86638	2.93842	2.33426	1.04134	1.23129	5.04817	3.23128	2.68777	4.63443	1.2883	3.52762	10.2261	1.44949	3.08051	3.82406	2.091	14.299	3.09767	1.24054	0.956688	2.21626	0.93016	0.873191	4.25272	16.0656	4.63986	12.4955	12.5294	7.22308	14.2064	14.6475	6.22955	22.6992	12.1785	7.05431	25.3269	15.86	4.50107	18.1247	8.55062
Pita_unigene24387	AT4G18700	7.78e-29	CBL-interacting protein kinase 12	Encodes CBL-interacting protein kinase 12 (CIPK12).	CBL-interacting protein kinase 12 (CIPK12); FUNCTIONS IN: protein serine/threonine kinase activity, protein kinase activity, kinase activity, ATP binding; INVOLVED IN: signal transduction, protein amino acid phosphorylation; EXPRESSED IN: 24 plant structures; EXPRESSED DURING: 15 growth stages; CONTAINS InterPro DOMAIN/s: Protein kinase, ATP binding site (InterPro:IPR017441), Serine/threonine-pro…	CAMK_CAMKL-CHK1	PK		Pita_unigene24387	2.4312	0.968446	4.05747	2.54158	6.59003	0.947687	1.82097	2.36948	1.72059	4.64061	5.2039	0.98268	3.21977	2.56784	7.7282	3.33748	1.89111	1.7114	0.897655	2.91509	1.79105	3.9624	2.2441	1.68401	7.47877	7.98658	0.448723	5.21674	5.49758	7.34768	11.124	13.8796	2.67894	21.317	26.2698	7.74335	11.0211	10.0852	5.28633	8.6286
Pita_unigene24122	AT5G21326	1.79e-36	Ca2+regulated serine-threonine protein kinase family protein	0	Ca2+regulated serine-threonine protein kinase family protein; FUNCTIONS IN: protein serine/threonine kinase activity, protein kinase activity, ATP binding; INVOLVED IN: signal transduction, protein amino acid phosphorylation; CONTAINS InterPro DOMAIN/s: Protein kinase, ATP binding site (InterPro:IPR017441), Serine/threonine-protein kinase domain (InterPro:IPR002290), NAF/FISL domain (InterPro:IPR…	CAMK_CAMKL-CHK1	PK		Pita_unigene24122	2.5247	8.83669	9.34368	12.8508	15.0052	7.17227	1.16036	10.651	3.25508	3.5459	9.43049	0	12.7853	8.70933	8.81238	13.3929	2.8121	3.15683	8.07335	12.1308	8.00602	10.1192	2.15858	7.57	17.5207	16.9564	4.59709	18.4217	36.2951	31.9815	34.9764	17.5245	9.57471	18.4736	42.6181	33.9613	33.1098	11.5623	4.71961	15.7992
Pita_unigene22461	AT1G11280	1.54e-33	S-locus lectin protein kinase family protein	0	S-locus lectin protein kinase family protein; FUNCTIONS IN: in 6 functions; INVOLVED IN: protein amino acid phosphorylation, recognition of pollen; EXPRESSED IN: 23 plant structures; EXPRESSED DURING: 15 growth stages; CONTAINS InterPro DOMAIN/s: Curculin-like (mannose-binding) lectin (InterPro:IPR001480), PAN-2 domain (InterPro:IPR013227), Apple-like (InterPro:IPR003609), Serine/threonine-protei…	RLK-Pelle_DLSV	PK		Pita_unigene22461	9.3796	4.26368	3.07274	2.48101	3.38625	4.03776	0.595922	3.30177	1.97115	2.71449	6.46188	6.95566	1.66071	2.21306	3.83229	3.91577	2.59094	1.60352	1.61945	3.93745	2.94664	4.32793	2.10925	5.52682	8.08042	6.49255	5.68477	12.0197	2.07854	11.9847	23.8693	16.236	15.5207	17.6216	8.35696	14.4976	5.10398	6.81969	7.35249	15.8488
Pita_unigene17384	AT1G45160	2.49e-47	Protein kinase superfamily protein	0	Protein kinase superfamily protein; FUNCTIONS IN: kinase activity; INVOLVED IN: protein amino acid phosphorylation; LOCATED IN: cellular_component unknown; EXPRESSED IN: 25 plant structures; EXPRESSED DURING: 15 growth stages; CONTAINS InterPro DOMAIN/s: Serine/threonine-protein kinase domain (InterPro:IPR002290), Serine/threonine-protein kinase-like domain (InterPro:IPR017442), Serine/threonine-…	AGC_RSK-2	PK		mnbnghy	0.421991	3.4299	1.23422	0.219025	0.278944	0.483217	2.32495	2.0207	3.74637	1.66566	5.42989	1.29121	0.26741	0.488002	4.91848	3.6733	0.292931	2.29128	0.260842	0.415111	0.849629	0.768822	0.804596	0.428298	9.1898	2.61909	6.59438	30.0096	12.453	3.89613	18.9538	14.65	20.1054	56.6371	38.4589	7.27296	2.8782	1.11545	1.20436	5.76558
Pita_unigene15889	AT5G01810	2.1e-43	CBL-interacting protein kinase 15	Encodes a CBL-interacting serine/threonine protein kinase, also has similarities to SOS2 kinase.	CBL-interacting protein kinase 15 (CIPK15); CONTAINS InterPro DOMAIN/s: Protein kinase, ATP binding site (InterPro:IPR017441), Serine/threonine-protein kinase domain (InterPro:IPR002290), Serine/threonine-protein kinase-like domain (InterPro:IPR017442), Serine/threonine-protein kinase, active site (InterPro:IPR008271), Protein kinase-like domain (InterPro:IPR011009), NAF domain (InterPro:IPR00404…	CAMK_CAMKL-CHK1	PK		Pita_unigene15889	5.54985	6.83862	4.94344	1.8008	7.48291	1.95064	2.70544	6.07841	4.90107	2.74179	4.33657	0.767976	2.66302	4.38096	5.37579	5.29507	1.34631	5.69061	1.02838	2.58554	2.39186	2.51644	2.59872	0.733586	32.613	23.7907	11.2971	23.2638	24.7872	11.5697	32.0824	60.4145	25.7672	19.8881	45.0624	21.4578	6.18927	6.77952	3.97863	5.49585
Pita_unigene15795	AT3G20830	1.1e-46	AGC (cAMP-dependent, cGMP-dependent and protein kinase C) kinase family protein	0	AGC (cAMP-dependent, cGMP-dependent and protein kinase C) kinase family protein; FUNCTIONS IN: kinase activity; INVOLVED IN: protein amino acid phosphorylation; LOCATED IN: chloroplast; EXPRESSED IN: hypocotyl, male gametophyte, root, pedicel, carpel; EXPRESSED DURING: 4 anthesis; CONTAINS InterPro DOMAIN/s: Protein kinase, ATP binding site (InterPro:IPR017441), Protein kinase, catalytic domain (…	AGC_RSK-2	PK		Pita_unigene15795	5.64832	7.72218	4.57046	2.27098	6.90905	5.20511	5.47576	1.9365	3.39372	2.30239	5.08619	5.14744	1.2824	0.913862	5.11601	3.58679	5.70326	5.62567	0.954359	1.67141	5.32574	2.66762	2.82947	2.58679	2.06001	2.96327	1.10629	0.232244	0.349551	0.458698	0.605914	2.06564	1.32605	0.0819826	0.310108	0.793874	0.838618	1.68538	1.28161	0.219749
Pita_unigene14566	AT3G18750	4.88e-93	with no lysine (K) kinase 6	Encodes a member of the WNK family (9 members in all) of protein kinases, the structural design of which is clearly distinct from those of other known protein kinases, such as receptor-like kinases and mitogen-activated protein kinases. Its transcription is under the control of circadian rhythms.	with no lysine (K) kinase 6 (WNK6); CONTAINS InterPro DOMAIN/s: Protein kinase, catalytic domain (InterPro:IPR000719), Serine/threonine-protein kinase domain (InterPro:IPR002290), Tyrosine-protein kinase, catalytic domain (InterPro:IPR020635), Serine/threonine-protein kinase-like domain (InterPro:IPR017442), Serine/threonine-protein kinase, active site (InterPro:IPR008271), Protein kinase-like do…	WNK_NRBP	PK		Pita_unigene14566	49.9924	36.1997	33.059	48.6579	47.2354	39.2282	51.0029	34.7686	35.7299	44.2372	58.7084	53.6376	49.288	27.028	26.45	47.1791	37.5775	52.4715	40.9614	21.6078	31.4909	25.9546	24.1181	33.6584	41.4826	25.1838	28.9497	10.5053	15.2194	27.7585	20.0275	23.8597	29.0943	3.92852	16.4188	14.8891	33.7085	26.0105	26.2462	8.59308
Pita_unigene1353	AT5G45820	7.64e-91	CBL-interacting protein kinase 20	Encodes a CBL-interacting serine/threonine protein kinase comprised of an N-terminal kinase catalytic domain similar to SNF1/AMPK and a unique C-terminal regulatory domain.	CBL-interacting protein kinase 20 (CIPK20); CONTAINS InterPro DOMAIN/s: Protein kinase, ATP binding site (InterPro:IPR017441), Serine/threonine-protein kinase domain (InterPro:IPR002290), NAF/FISL domain (InterPro:IPR018451), Serine/threonine-protein kinase-like domain (InterPro:IPR017442), Protein kinase-like domain (InterPro:IPR011009), Serine/threonine-protein kinase, active site (InterPro:IPR…	CAMK_CAMKL-CHK1	PK		Pita_unigene1353	14.8747	13.4298	16.0887	8.67335	8.0132	17.7664	15.1607	20.0278	10.7605	9.0941	7.34074	13.3103	12.7334	31.5185	16.0452	13.2208	26.4152	20.7799	5.2782	29.6742	5.76455	4.74625	10.0128	10.7603	64.4053	32.3426	35.9759	31.896	31.1528	32.5902	67.0146	31.6084	49.4877	25.9801	38.6468	23.1	48.4284	20.9779	29.8442	19.3473
Pita_unigene1352	AT5G01810	2.93e-36	CBL-interacting protein kinase 15	Encodes a CBL-interacting serine/threonine protein kinase, also has similarities to SOS2 kinase.	CBL-interacting protein kinase 15 (CIPK15); CONTAINS InterPro DOMAIN/s: Protein kinase, ATP binding site (InterPro:IPR017441), Serine/threonine-protein kinase domain (InterPro:IPR002290), Serine/threonine-protein kinase-like domain (InterPro:IPR017442), Serine/threonine-protein kinase, active site (InterPro:IPR008271), Protein kinase-like domain (InterPro:IPR011009), NAF domain (InterPro:IPR00404…	CAMK_CAMKL-CHK1	PK		Pita_unigene1352	18.7318	14.4176	15.2307	10.2988	14.6095	11.983	11.8454	13.8325	13.5974	9.94772	10.5601	12.2063	15.1838	15.0428	13.919	15.7274	11.1209	16.662	8.48742	20.9697	7.60642	9.56659	12.3998	10.6446	55.359	42.9299	33.6099	26.8349	26.7417	77.2875	43.7042	52.1805	44.1457	26.1354	34.9262	48.3752	22.4518	19.4813	17.7582	12.7436
Pita_unigene1339	AT4G37250	8.52e-148	Leucine-rich repeat protein kinase family protein	0	Leucine-rich repeat protein kinase family protein; FUNCTIONS IN: protein serine/threonine kinase activity, kinase activity, ATP binding; INVOLVED IN: transmembrane receptor protein tyrosine kinase signaling pathway, protein amino acid phosphorylation; LOCATED IN: endomembrane system; EXPRESSED IN: 22 plant structures; EXPRESSED DURING: 13 growth stages; CONTAINS InterPro DOMAIN/s: Protein kinase,…	RLK-Pelle_LRR-III	PK		Pita_unigene1339	1.42301	1.70519	1.42214	1.54765	1.42962	1.13756	1.16852	0.937623	0.529183	0.836844	1.02413	0.540975	0.957187	0.806634	0.986173	1.35619	0.998581	1.1921	0.695047	0.443499	0.679394	0.598497	0.735722	0.348979	0.60374	1.11072	1.03816	0.280744	0.451854	0.493893	0	0.553383	0.510387	0	0.0694886	0.227002	0.327896	0.944339	0.653773	0.0966167
Pita_unigene13325	AT1G28440	1.1e-125	HAESA-like 1	0	HAESA-like 1 (HSL1); FUNCTIONS IN: protein serine/threonine kinase activity, kinase activity, ATP binding; INVOLVED IN: transmembrane receptor protein tyrosine kinase signaling pathway, protein amino acid phosphorylation; EXPRESSED IN: 22 plant structures; EXPRESSED DURING: 13 growth stages; CONTAINS InterPro DOMAIN/s: Protein kinase, ATP binding site (InterPro:IPR017441), Protein kinase, catalyt…	RLK-Pelle_LRR-XI-1	PK		Pita_unigene13325	1.85633	3.72893	5.42387	2.35685	4.41817	2.82391	4.64388	6.13293	7.03526	6.17383	5.39254	4.33504	3.13825	4.13014	4.20404	4.85878	3.67976	4.06874	3.29572	2.96843	3.609	3.19453	2.70363	2.6422	1.4726	1.91931	1.87473	1.725	1.28615	2.14478	1.27648	0.988434	1.0083	0.88879	1.28665	2.58071	0.328436	1.92487	1.7034	2.26889
Pita_unigene13030	AT4G32300	1.13e-54	S-domain-2 5	0	S-domain-2 5 (SD2-5); FUNCTIONS IN: carbohydrate binding, protein kinase activity, kinase activity; INVOLVED IN: protein amino acid autophosphorylation; LOCATED IN: plasma membrane; EXPRESSED IN: 25 plant structures; EXPRESSED DURING: 15 growth stages; CONTAINS InterPro DOMAIN/s: Curculin-like (mannose-binding) lectin (InterPro:IPR001480), Protein kinase, ATP binding site (InterPro:IPR017441), Pr…	RLK-Pelle_SD-2b	PK		Pita_unigene13030	2.08625	1.0168	1.71474	0.920925	1.70435	1.65828	1.13147	2.3763	1.97181	1.89186	1.79788	1.76696	0.802009	1.07708	2.3916	2.66874	0.670193	1.99242	1.23533	1.65584	0.743159	1.2146	1.73839	1.50663	1.96762	1.31512	1.22528	0.837087	1.27825	1.37366	3.03068	1.3272	2.51394	0.893578	2.38678	2.73845	5.36701	3.4229	7.42861	4.54618
Pita_unigene12650	AT5G65700	0	Leucine-rich receptor-like protein kinase family protein	Encodes a CLAVATA1-related receptor kinase-like protein required for both shoot and flower meristem function. Very similar to BAM2,with more than 85% a.a. identity. It has a broad expression pattern and is involved in vascular strand development in the leaf, control of leaf shape, size and symmetry, male gametophyte development and ovule specification and function. Anthers of double mutants (bam1…	BARELY ANY MERISTEM 1 (BAM1); CONTAINS InterPro DOMAIN/s: Protein kinase, catalytic domain (InterPro:IPR000719), Leucine-rich repeat-containing N-terminal domain, type 2 (InterPro:IPR013210), Leucine-rich repeat (InterPro:IPR001611), Serine/threonine-protein kinase-like domain (InterPro:IPR017442), Protein kinase-like domain (InterPro:IPR011009), Serine/threonine-protein kinase, active site (Inte…	RLK-Pelle_LRR-XI-1	PK		Pita_unigene12650	0.921205	1.10885	0.363067	0.397822	1.52562	0.77489	0.551252	0.447602	0.35835	0.391657	0.289882	0.568384	0.511276	0.374419	0.828515	1.13508	0.178699	0.671135	0.436231	0.331525	0.607601	0.771097	0.197919	0.229158	0.553496	0.277551	0.441728	0.056122	0	0.105653	0.31928	0.0969023	0.327038	0.110735	0.054217	0.0863609	0.311734	0.192069	0.445752	0.0163874
Pita_unigene12021	AT2G19130	0	S-locus lectin protein kinase family protein	0	S-locus lectin protein kinase family protein; FUNCTIONS IN: protein serine/threonine kinase activity, sugar binding, protein kinase activity, ATP binding; INVOLVED IN: protein amino acid phosphorylation, recognition of pollen; LOCATED IN: endomembrane system; EXPRESSED IN: 19 plant structures; EXPRESSED DURING: 13 growth stages; CONTAINS InterPro DOMAIN/s: Curculin-like (mannose-binding) lectin (…	RLK-Pelle_SD-2b	PK		Pita_unigene12021	33.7731	7.01054	29.0441	26.2518	26.5582	23.5125	15.3591	20.7346	3.75287	18.102	14.9979	14.0143	16.0059	13.646	4.46505	14.6149	11.997	18.4513	16.7954	13.5185	3.01959	13.2571	13.8811	11.6128	14.9593	23.8349	5.25313	5.71322	2.16962	6.7116	9.01662	10.4978	3.3703	1.33108	1.81389	2.24286	8.36891	14.6944	5.59857	4.96865
Pita_unigene11317	AT4G10730	0	Protein kinase superfamily protein	0	Protein kinase superfamily protein; FUNCTIONS IN: protein serine/threonine kinase activity, protein kinase activity, kinase activity, ATP binding; INVOLVED IN: protein amino acid phosphorylation; LOCATED IN: plasma membrane; EXPRESSED IN: stem, cultured cell; CONTAINS InterPro DOMAIN/s: Protein kinase, ATP binding site (InterPro:IPR017441), Protein kinase, catalytic domain (InterPro:IPR000719), S…	STE_STE20-Fray	PK		Pita_unigene11317	0.922587	0.541842	0.58471	0.888794	0.855568	0.137781	0.118517	0.50197	0.521738	0.268264	1.01225	0.392385	0.674238	0.72353	0.326258	0.710575	0.0476381	0.835901	0.964926	0.728475	0.533472	1.27425	0.371174	0.207433	0	0.242839	0	0.0650598	0.142948	0.584531	0.186088	0.667118	0.716988	0.292696	0.201276	0.316627	0.398722	0.520953	0.377591	0.0617393
Pita_unigene1035	AT3G19300	6.8e-76	Protein kinase superfamily protein	0	Protein kinase superfamily protein; FUNCTIONS IN: kinase activity; INVOLVED IN: protein amino acid phosphorylation; LOCATED IN: plasma membrane; EXPRESSED IN: 9 plant structures; EXPRESSED DURING: 6 growth stages; CONTAINS InterPro DOMAIN/s: Protein kinase, ATP binding site (InterPro:IPR017441), Protein kinase, catalytic domain (InterPro:IPR000719), Serine/threonine-protein kinase-like domain (In…	RLK-Pelle_URK-1	PK		Pita_unigene1035	0.864806	0.660784	0.959281	0.459524	1.8903	0.757805	0.612933	1.67317	1.32938	1.0674	2.48851	0.845378	0.750967	0.985156	1.49995	2.00312	0.376419	1.49853	0.912316	1.03521	1.05803	1.1227	0.978441	0.507939	0.501403	1.0532	0.189803	0.0533904	0.267019	0.103626	2.17907	2.54249	0.828788	0.377873	0.821438	0.819753	0.53097	1.65899	1.00089	0.52596
[truncated: 8 more columns]
