# Supplementary material for: The Transcriptional Landscape and Hub Genes Associated with Physiological Responses to Drought Stress in Pinus tabuliformis
Source: Int J Mol Sci. 2021 Sep 4;22(17):9604. doi: 10.3390/ijms22179604 (PMC8431770; doi:10.3390/ijms22179604)
Supplement: Supplementary file 1 [file ijms-22-09604-s001.zip › S5 Transcriptional regulators .xlsx]

## Sheet: Sheet1
Transcriptional regulators differentially expressed under drought stress
target_id	ID	p	short_description	Curator_summary	Computational_description	gh	gh	gh	C1-1	C2-1	C3-1	C4-1	C5-1	C6-1	C1-2	C2-2	C3-2	C4-2	C5-2	C6-2	C1-3	C2-3	C3-3	C4-3	C5-3	C6-3	C1-4	C2-4	C3-4	C4-4	C5-4	C6-4	D1-1	D2-1	D3-1	D4-1	D5-1	D6-1	D1-2	D2-2	D3-2	D4-2	D5-2	D6-2	R1-1	R2-1	R3-1	R4-1	R5-1
Pita_unigene9031	AT2G23060	5.27e-158	Acyl-CoA N-acyltransferases (NAT) superfamily protein	0	Acyl-CoA N-acyltransferases (NAT) superfamily protein; FUNCTIONS IN: N-acetyltransferase activity; INVOLVED IN: metabolic process; LOCATED IN: cellular_component unknown; EXPRESSED IN: embryo, leaf whorl, flower, pedicel, seed; EXPRESSED DURING: 4 anthesis, F mature embryo stage, petal differentiation and expansion stage, E expanded cotyledon stage, D bilateral stage; CONTAINS InterPro DOMAIN/s: …	GNAT	TR	Pita_unigene9031	2.36444	4.33067	1.2627	2.13592	3.67324	2.1004	1.11663	0.907519	2.57545	1.26413	2.50043	1.16796	2.93782	1.25562	2.80921	2.48089	2.30705	1.17817	2.12293	0.823209	1.45465	0.939455	1.53069	1.62648	1.43718	1.20958	1.08804	0.984755	1.89711	0.321771	0.372258	0.94363	1.57767	0.219493	0.512792	0.350962	0.908077	1.94658	1.57667	0.781262	0.636427
Pita_unigene8767	AT5G20510	3.12e-96	alfin-like 5	Encodes a member of the Alfin1-like family of nuclear-localized PHD (plant homeodomain) domain containing proteins. All AL proteins except AL3 bind to di- or trimethylated histone H3 (H3K4me3/2). Members of this family include: AT5G05610 (AL1), AT3G11200 (AL2), AT3G42790 (AL3), AT5G26210 (AL4), AT5G20510 (AL5), AT2G02470 (AL6), AT1G14510 (AL7).	alfin-like 5 (AL5); CONTAINS InterPro DOMAIN/s: Zinc finger, PHD-type, conserved site (InterPro:IPR019786), Protein of unknown function DUF3594 (InterPro:IPR021998), Zinc finger, PHD-type (InterPro:IPR001965), Zinc finger, FYVE/PHD-type (InterPro:IPR011011), Zinc finger, PHD-finger (InterPro:IPR019787); BEST Arabidopsis thaliana protein match is: alfin-like 3 (TAIR:AT3G42790.1); Has 1720 Blast hi…	PHD	TR	Pita_unigene8767	1.52707	0.0487145	0	0	2.33872	0.0471313	1.11637	0	0.0429248	0	2.61673	0.0996437	0	0	0	1.55234	0	1.26263	0.0919455	0.0465975	0	2.10123	1.77509	0	30.4397	3.54451	29.1354	0.557429	15.7723	15.1051	39.3429	4.74777	35.0951	0.792572	19.9745	16.1058	39.642	4.24175	38.4953	0.764062	22.7785
Pita_unigene63770	AT1G01920	2.28e-142	SET domain-containing protein	0	SET domain-containing protein; CONTAINS InterPro DOMAIN/s: SET domain (InterPro:IPR001214); BEST Arabidopsis thaliana protein match is: Rubisco methyltransferase family protein (TAIR:AT1G14030.1); Has 35333 Blast hits to 34131 proteins in 2444 species: Archae - 798; Bacteria - 22429; Metazoa - 974; Fungi - 991; Plants - 531; Viruses - 0; Other Eukaryotes - 9610 (source: NCBI BLink).	SET	TR	Pita_unigene63770	0.55152	0	0.243924	0.433619	1.16855	0.477067	0.356379	0.166504	0	0.575586	0	0.643195	0.540137	0.565497	0.520088	0.484922	0.122357	0.191006	0.713408	0.179909	0.500062	0.495374	0.271881	0.170799	0.430951	0.653666	0.612742	0.461469	0.923029	0.859993	1.07628	0.194145	0.459373	0.33453	0.256232	0.451983	0	0	0	0	0.325984
Pita_unigene58613	0	0	0	0	0	Others	TR	Pita_unigene58613	19.7502	0.176807	0	0.061434	1.51411	4.82603	0.237774	0.0586664	0.42058	0.280377	0.228451	0.241593	0.168843	0.410611	0.424896	0.291707	0.197838	0.165637	0.0549006	0.116365	0.165099	0	0.225935	0.309057	0.327871	0.125529	4.083	0.410698	1.08455	4.23185	2.19018	0.183123	4.84062	1.58647	0.68165	0.873296	1.80171	0	6.91973	0.4546	0.219466
Pita_unigene57976	AT5G26594	7.24e-24	response regulator 24	Encodes an atypical subtype of the ARR (Arabidopsis response regulator) protein family . It appears to be expressed in floral buds, mature flowers, and pollen. But, unlike the related ARR22 protein, it does not appear to be expressed at the seed:funiculus junction.	response regulator 24 (RR24); FUNCTIONS IN: two-component response regulator activity; INVOLVED IN: regulation of transcription, DNA-dependent, two-component signal transduction system (phosphorelay); LOCATED IN: cellular_component unknown; EXPRESSED IN: fruit, male gametophyte, flower, floral bud; CONTAINS InterPro DOMAIN/s: CheY-like (InterPro:IPR011006), Signal transduction response regulator,…	Others	TR	Pita_unigene57976	7.84647	5.10872	6.49439	8.49157	3.99535	12.3056	4.00347	4.71282	3.52899	4.44296	1.98604	6.02066	7.57053	0.877946	3.25587	2.33045	5.23465	3.68193	7.82647	1.62415	7.99176	2.25894	4.90034	8.5044	2.18162	3.19923	3.4114	0.65848	1.30921	2.64739	5.22271	2.06833	3.41978	1.96948	2.11033	5.36917	2.97283	6.50252	12.9591	2.36773	4.31711
Pita_unigene56667	0	0	0	0	0	Others	TR	Pita_unigene56667	0.917865	0.683432	0.211279	0.717807	0.707347	1.34249	0.214373	4.75849	0.608791	1.7454	2.22534	2.33018	2.39761	3.80636	0.613023	1.35645	2.21225	0.416294	0.212263	2.97237	0.424766	4.36535	1.73278	1.99123	0.506465	0.994561	1.0511	0	6.80243	1.51766	6.59157	4.25976	2.02027	4.32551	3.0631	5.14818	6.45983	4.38516	5.53486	2.1491	9.55626
Pita_unigene55491	AT3G24500	5.54e-62	multiprotein bridging factor 1C	One of three genes in A. thaliana encoding multiprotein bridging factor 1, a highly conserved transcriptional coactivator. May serve as a bridging factor between a bZIP factor and TBP. Its expression is specifically elevated in response to pathogen infection, salinity, drought, heat, hydrogen peroxide, and application of abscisic acid or salicylic acid. Constitutive expression enhances the tolera…	multiprotein bridging factor 1C (MBF1C); FUNCTIONS IN: transcription coactivator activity, DNA binding, sequence-specific DNA binding transcription factor activity; INVOLVED IN: in 7 processes; LOCATED IN: nucleolus; EXPRESSED IN: 24 plant structures; EXPRESSED DURING: 14 growth stages; CONTAINS InterPro DOMAIN/s: Multiprotein bridging factor 1, N-terminal (InterPro:IPR013729); BEST Arabidopsis t…	MBF1	TR	Pita_unigene55491	27.4177	18.3851	24.5402	14.0552	0	5.40425	9.97989	7.45948	11.2715	8.20127	0	0.757728	5.99183	6.093	7.11784	0	1.30766	8.03739	7.3194	3.81724	17.7555	0	27.5497	3.1386	1.99208	9.17978	0	0	4.09934	0	0.968739	5.23183	0	0	1.31152	0	0	2.47109	0	0	0.531005
Pita_unigene55414	AT4G38960	4.85e-36	B-box type zinc finger family protein	0	B-box type zinc finger family protein; FUNCTIONS IN: sequence-specific DNA binding transcription factor activity, zinc ion binding; INVOLVED IN: regulation of transcription; LOCATED IN: endomembrane system, intracellular; EXPRESSED IN: 18 plant structures; EXPRESSED DURING: 8 growth stages; CONTAINS InterPro DOMAIN/s: Zinc finger, B-box (InterPro:IPR000315); BEST Arabidopsis thaliana protein matc…	Others	TR	Pita_unigene55414	1.61205e-06	4.87472	12.634	9.10699	11.2761	15.1581	5.72264	9.73977	8.58747	7.366	10.0883	14.684	9.11881	10.4313	10.1985	16.7398	16.203	1.17762	3.0331	4.71077	2.2509	6.65755	0.667125	8.98748	2.41154	2.63991	13.7791	0	9.89544	9.15702	2.71165	0	7.96269	0	3.93814	1.26167	0.609571	1.84716	16.5119	0.649991	4.91838
Pita_unigene46160	AT5G26594	1.11e-24	response regulator 24	Encodes an atypical subtype of the ARR (Arabidopsis response regulator) protein family . It appears to be expressed in floral buds, mature flowers, and pollen. But, unlike the related ARR22 protein, it does not appear to be expressed at the seed:funiculus junction.	response regulator 24 (RR24); FUNCTIONS IN: two-component response regulator activity; INVOLVED IN: regulation of transcription, DNA-dependent, two-component signal transduction system (phosphorelay); LOCATED IN: cellular_component unknown; EXPRESSED IN: fruit, male gametophyte, flower, floral bud; CONTAINS InterPro DOMAIN/s: CheY-like (InterPro:IPR011006), Signal transduction response regulator,…	Others	TR	Pita_unigene46160	7.28131	4.36159	3.81031	5.18291	4.11279	4.81885	2.16675	2.36611	2.79223	3.4313	3.45872	2.37589	1.97435	0.959362	2.07512	1.36228	0.717919	1.58173	2.33986	0.872455	3.02306	1.9991	3.24968	2.54374	5.67297	5.32191	3.67916	3.75169	3.632	6.75133	4.72565	5.88391	3.96815	1.95335	3.01898	5.34345	4.39587	4.02633	5.15589	3.75433	2.58352
Pita_unigene46083	AT2G01830	0	CHASE domain containing histidine kinase protein	Histidine kinase: cytokinin-binding receptor that transduces cytokinin signals across the plasma membrane	WOODEN LEG (WOL); FUNCTIONS IN: osmosensor activity, cytokine binding, cytokinin receptor activity, protein histidine kinase activity, phosphoprotein phosphatase activity; INVOLVED IN: in 7 processes; LOCATED IN: membrane; EXPRESSED IN: 30 plant structures; EXPRESSED DURING: 13 growth stages; CONTAINS InterPro DOMAIN/s: Signal transduction histidine kinase, homodimeric (InterPro:IPR009082), CHASE…	Others	TR	Pita_unigene46083	2.34027	2.39614	1.83827	1.10382	1.32086	1.07241	1.59554	1.99337	2.28244	1.44588	1.88774	1.34438	0.84652	1.06221	1.48466	1.35113	1.14191	1.80267	0.652724	0.77222	0.983137	0.87616	0.790204	0.656942	1.11074	1.96528	1.03856	0.3996	0.406246	1.39758	0.552718	0.504033	0.367816	0	0.109269	0.828092	0.549072	1.49894	0.903828	0.408751	0.0975204
Pita_unigene43170	0	0	0	0	0	TRAF	TR	Pita_unigene43170	0.775454	0	0	0	0	0	0.074494	0	0	0	0.838291	0	0	0.907223	0	0.0779493	0	0.471789	0	0.508928	0	0	0.26243	0	0	0	0.29075	0	0.206956	0.0743055	0	0	0.431821	0	0	0.0730649	0.375684	1.3313	1.53459	0.472251	1.88202
Pita_unigene42898	AT3G56230	1.38e-65	BTB/POZ domain-containing protein	0	BTB/POZ domain-containing protein; CONTAINS InterPro DOMAIN/s: BTB/POZ (InterPro:IPR013069), BTB/POZ fold (InterPro:IPR011333), Kelch related (InterPro:IPR013089), BTB/POZ-like (InterPro:IPR000210); BEST Arabidopsis thaliana protein match is: BTB/POZ domain-containing protein (TAIR:AT1G01640.2); Has 5225 Blast hits to 5141 proteins in 152 species: Archae - 0; Bacteria - 0; Metazoa - 3910; Fungi -…	TRAF	TR	Pita_unigene42898	3.94672	2.30574	1.95237	2.65218	3.31293	1.86358	3.58275	2.76789	2.15756	5.62071	3.05329	4.10305	4.96734	2.03565	2.79916	1.11458	2.67979	2.06384	3.96622	5.54251	0.909983	3.00905	3.11947	4.6478	2.27069	3.91445	6.10257	5.30066	4.05509	13.9278	5.04132	5.13308	6.60019	4.31159	7.64444	15.1528	8.78101	5.03516	4.40408	7.30258	9.34715
Pita_unigene40412	AT1G59940	1.07e-48	response regulator 3	Type A response regulator highly similar to bacterial two-component response regulators. Rapidly induced by cytokinin. Involved in red-light signaling. Acts redundantly with ARR3 in the control of circadian period in a cytokinin-independent manner.	response regulator 3 (ARR3); CONTAINS InterPro DOMAIN/s: CheY-like (InterPro:IPR011006), Signal transduction response regulator, receiver domain (InterPro:IPR001789); BEST Arabidopsis thaliana protein match is: response regulator 4 (TAIR:AT1G10470.1); Has 60077 Blast hits to 59393 proteins in 2784 species: Archae - 301; Bacteria - 52871; Metazoa - 21; Fungi - 539; Plants - 1521; Viruses - 7; Othe…	Others	TR	Pita_unigene40412	0.781926	0.700179	0.386072	1.00792	0.947141	1.01453	0.873273	1.01284	0.538447	0.844528	0.554568	0.707532	0.866197	0.918698	2.31459	0.863137	1.00179	0.875051	0.319039	1.58436	0.611523	0.592147	1.05591	1.31412	1.24392	0.942148	0.463549	1.02674	1.309	1.87008	1.04707	0.455848	1.07226	0.740272	0.242118	1.01068	1.57372	2.19062	2.00337	2.1642	1.00542
Pita_unigene39044	AT5G24330	3.99e-148	ARABIDOPSIS TRITHORAX-RELATED PROTEIN 6	Encodes a SET-domain protein, a H3K27 monomethyltransferases required for chromatin structure and gene silencing. Regulates heterochromatic DNA replication. Contains a PCNA-binding domain. ATXR6 accumulates preferentially during the late G1 or S phase, suggesting that it plays a role in cell-cycle regulation or progression.	ARABIDOPSIS TRITHORAX-RELATED PROTEIN 6 (ATXR6); CONTAINS InterPro DOMAIN/s: SET domain (InterPro:IPR001214), Zinc finger, PHD-type, conserved site (InterPro:IPR019786), Zinc finger, PHD-type (InterPro:IPR001965), Zinc finger, FYVE/PHD-type (InterPro:IPR011011), Zinc finger, PHD-finger (InterPro:IPR019787); BEST Arabidopsis thaliana protein match is: ARABIDOPSIS TRITHORAX-RELATED PROTEIN 5 (TAIR:…	PHD	TR	Pita_unigene39044	0.318051	0.452507	0.752235	0.471342	0.805415	0.267994	0.0428918	0.135128	0.201828	0.301237	0.306727	0	0.0432063	0	0.407981	0.313474	0.0381009	0.127441	0.126445	0	0.0422593	0.0828798	0.433969	0.0395426	0	0.192335	0.167219	0.0450922	0.39648	0.0426104	0	0	0.0989789	0.0871013	0.0436247	0.0836817	0.0432541	0.0515225	0	0.0387781	0.12636
Pita_unigene35708	AT2G01830	1.02e-129	CHASE domain containing histidine kinase protein	Histidine kinase: cytokinin-binding receptor that transduces cytokinin signals across the plasma membrane	WOODEN LEG (WOL); FUNCTIONS IN: osmosensor activity, cytokine binding, cytokinin receptor activity, protein histidine kinase activity, phosphoprotein phosphatase activity; INVOLVED IN: in 7 processes; LOCATED IN: membrane; EXPRESSED IN: 30 plant structures; EXPRESSED DURING: 13 growth stages; CONTAINS InterPro DOMAIN/s: Signal transduction histidine kinase, homodimeric (InterPro:IPR009082), CHASE…	Others	TR	Pita_unigene35708	0.403659	0.266939	0.0374709	0.0123345	0.887576	0.394802	0.0318316	0.464497	0.269035	0.733268	0.353006	0.289553	0.444347	0.566147	1.02613	1.11741	0.306711	0.325567	0.297698	0.182498	0.226107	0.0576922	0.174925	0.106891	0	0.203477	0.134773	0.201298	0.521433	0.534426	0.217055	0.128289	0.00186895	0	0.155777	0	0.0211829	0.407348	0.267387	0.0180643	0
Pita_unigene2115	0	0	0	0	0	mTERF	TR	Pita_unigene2115	20.2793	43.4291	27.5077	14.2411	5.49644	17.7625	6.98089	37.4854	37.4591	14.2769	6.88859	20.7129	7.56806	19.4324	17.2396	6.28358	14.5925	10.3165	16.0104	23.5643	17.2391	10.1405	12.2036	26.3759	7.07792	4.873	15.4202	4.77123	10.3446	17.6535	6.70359	5.26645	10.8199	3.2155	5.74773	5.00762	10.5949	5.24969	18.0324	8.09972	9.1044
Pita_unigene10032	0	0	0	0	0	Others	TR	Pita_unigene10032	2.88208	0.399035	0.238765	0.44469	0.432068	0	0.307586	4.74209	0.447571	0.201639	1.69123	0.736453	0.754029	1.26982	1.26148	2.48019	1.96253	0.91736	1.52585	1.41731	0.363019	3.89002	3.60518	1.85798	0.315109	0	0.522907	1.46722	3.8089	2.8606	4.36627	0.175329	1.21433	2.73333	3.3934	12.9071	14.9655	2.19335	10.1177	3.08936	12.001
[truncated: 7 more columns]
